# Supplementary material for: A native chemical chaperone in the human eye lens
Source: eLife. 2022 Jun 20;11:e76923. doi: 10.7554/eLife.76923 (PMC9246369; doi:10.7554/eLife.76923)
Supplement: Figure 1—source data 1. [file elife-76923-fig1-data1.xlsx]

## Sheet: Sheet1
										2020-07-06										2020-07-14
		HEPES				PIPES
		final turbidity	normalized to "none"	remaining soluble protein	normalized to "none with DTT"	final turbidity	normalized to "none"	remaining soluble protein	normalized to "none with DTT"	HEPES			Mean	SEM
	none	0.481548	100	0.941667	54.4893	0.367886	100	0.926667	55.7505	none			0.941667	0.0112002	0.7865		SEM %	SEM
	galactose	0.333	69.152	1.211	70.0743	0.309143	84.0323	1.24467	74.8822	galactose			1.211	0.0128582	0.517167	34.2445	2.48628	0.851415
	inositol	0.340452	70.6996	1.19667	69.2449	0.251257	68.2976	1.20367	72.4155	inositol			1.19667	0.0177983	0.5315	32.4221	3.34868	1.08571
	glucose	0.344571	71.555	1.21667	70.4022	0.2922	79.4268	1.142	68.7055	glucose			1.21667	0.014881	0.5115	34.965	2.90929	1.01723
	sucrose	0.295214	61.3053	1.32867	76.883	0.221029	60.0808	1.40467	84.5082	sucrose			1.32867	0.00417665	0.3995	49.2053	1.04547	0.514427
	trehalose	0.294286	61.1125	1.261	72.9675	0.247914	67.3889	1.33467	80.2968	trehalose			1.261	0.00953939	0.467167	40.6018	2.04197	0.829076
	arabinose	0.414429	86.0618	1.13033	65.4065	0.349914	95.1149	1.14267	68.7456	arabinose			1.13033	0.010729	0.597833	23.9881	1.79464	0.430502
	rhamnose	0.394	81.8195	1.22167	70.6915	0.333229	90.5794	1.05433	63.4313	rhamnose			1.22167	0.0117804	0.5065	35.6008	2.32584	0.828018
	mannitol	0.405929	84.2967	1.24767	72.196	0.333114	90.5483	1.08833	65.4768	none, +DTT			1.72817	0.0075351	0	100
	none with DTT	0.000380952	0.07911	1.72817	100	5.71429e-05	0.0155328	1.66217	100	mannitol			1.24767	0.00664162	0.4805	38.9065	1.38223	0.537778
	glycerol	0.505286	104.93	1.17167	67.7982	0.417714	113.545	0.994667	59.8416	glycerol			1.17167	0.00940449	0.5565	29.2435	1.68994	0.494196
	IPTG	0.532857	110.655	1.189	68.8012	0.426686	115.983	1.084	65.2161	IPTG			1.189	0.00208167	0.539167	31.4473	0.38609	0.121415
										PIPES
										none			0.926667	0.00808977	0.7355		1.0999
										galactose			1.24467	0.0161898	0.4175	43.2359	3.87781	1.6766
										inositol			1.20367	0.0104934	0.4585	37.6615	2.28863	0.861933
										glucose			1.142	0.0034641	0.520167	29.2771	0.66596	0.194974
										sucrose			1.40467	0.0256667	0.2575	64.9898	9.96764	6.47795
										trehalose			1.33467	0.0124677	0.3275	55.4725	3.80694	2.1118
										arabinose			1.14267	0.00688799	0.5195	29.3678	1.32589	0.389384
										rhamnose			1.05433	0.0121974	0.607833	17.3578	2.00671	0.348321
										none, +DTT			1.66217	0.0200028	0	100
										mannitol			1.08833	0.00120185	0.573833	21.9805	0.209442	0.0460365
										glycerol			0.994667	0.0102686	0.6675	9.24541	1.53837	0.142229
										IPTG			1.084	0.00665833	0.578167	21.3913	1.15163	0.246349
	7/14/20 plate 1
		HEPES				PIPES				MES
		final turbidity	normalized to "none"	remaining soluble protein	normalized to "none with DTT"	final turbidity	normalized to "none"	remaining soluble protein	normalized to "none with DTT"	final turbidity			normalized to "none"	remaining soluble protein	normalized to "none with DTT"
	none	0.528071	100	0.988	60.4775	0.356429	100	1.03933	62.1735	0.422405			100	0.954333	57.2944
	galactose	0.346738	65.6612	1.21633	74.4542	0.2545	71.4028	1.243	74.3569	0.270643			64.0719	1.289	77.3864
	inositol	0.36131	68.4206	1.13833	69.6797	0.241738	67.8223	1.213	72.5623	0.250429			59.2864	1.24367	74.6648
	glucose	0.396571	75.0981	1.14	69.7817	0.2815	78.978	1.137	68.016	0.340929			80.7113	1.167	70.062
	sucrose	0.345619	65.4493	1.223	74.8623	0.229381	64.3554	1.25067	74.8156	0.236095			55.8931	1.31133	78.7272
	trehalose	0.36731	69.5568	1.19733	73.2912	0.231714	65.01	1.176	70.349	0.281429			66.6253	1.251	75.1051
	arabinose	0.515762	97.669	1.0485	64.1808	0.354381	99.4255	1.02733	61.4556	0.382048			90.4459	1.06	63.6382
	rhamnose	0.497476	94.2062	1.06833	65.3948	0.371952	104.355	0.996333	59.6012	0.420333			99.5096	1.02133	61.3168
	mannitol	0.507857	96.1721	1.05267	64.4358	0.353548	99.1917	1.02567	61.3559	0.368524			87.2442	1.063	63.8183
	none with DTT	-0.000238095	-0.0450877	1.63367	100	0.00197619	0.554442	1.67167	100	-0.0012381			-0.293106	1.66567	100
	glycerol	0.546286	103.449	0.933	57.1108	0.427476	119.933	0.946333	56.6102	0.46631			110.394	0.945	56.734
	IPTG	0.628476	119.013	0.958333	58.6615	0.538262	151.015	0.88	52.6421	0.583476			138.132	0.883	53.0118
	7/14/20 plate 2
		HEPES				PIPES				MES
		final turbidity	normalized to "none"	remaining soluble protein	normalized to "none with DTT"	final turbidity	normalized to "none"	remaining soluble protein	normalized to "none with DTT"	final turbidity			normalized to "none"	remaining soluble protein	normalized to "none with DTT"
	none	0.634333	100	1.00967	59.4504	0.544762	100	1.01367	61.7964	0.606952			100	0.979	59.8655
	galactose	0.404119	63.7077	1.342	79.0186	0.34331	63.0201	1.225	74.6799	0.380286			62.655	1.26333	77.2523
	inositol	0.434881	68.5572	1.312	77.2522	0.343119	62.9851	1.226	74.7409	0.356905			58.8028	1.25067	76.4778
	glucose	0.44369	69.946	1.25867	74.1119	0.383071	70.3191	1.14833	70.0061	0.452714			74.5881	1.19067	72.8088
	sucrose	0.363667	57.3305	1.3765	81.05	0.283238	51.993	1.278	77.911	0.308333			50.8003	1.307	79.9225
	trehalose	0.376238	59.3124	1.3985	82.3454	0.297976	54.6984	1.246	75.9602	0.320048			52.7303	1.261	77.1097
	arabinose	0.54131	85.3352	1.21033	71.2659	0.478738	87.8802	1.024	62.4263	0.556595			91.7033	1.075	65.7358
	rhamnose	0.502429	79.2058	1.204	70.893	0.473643	86.9449	1.06533	64.9461	0.52719			86.8586	1.04967	64.1867
	mannitol	0.504262	79.4948	1.226	72.1884	0.402714	73.9248	1.08933	66.4093	0.469119			77.2909	1.106	67.6315
	none with DTT	-4.7619e-05	-0.00750694	1.69833	100	2.38095e-05	0.00437063	1.64033	100	-0.000809524			-0.133375	1.63533	100
	glycerol	0.5785	91.1981	1.09967	64.7498	0.539	98.9423	1.00733	61.4103	0.568143			93.6058	0.993333	60.7419
	IPTG	0.590238	93.0486	1.10367	64.9853	0.631571	115.935	0.911333	55.5578	0.689238			113.557	0.927333	56.7061
	SUMMARY:
		FINAL TURBIDITY, NORMALIZED												FINAL TURBIDITY, NORMALIZED
		HEPES			PIPES			MES			TOTAL COMBINED			HEPES			PIPES			MES
		exp1	exp2	exp3	exp1	exp2	exp3	exp1	exp2		mean	SEM		2020-07-06	mean	stdev	2020-07-06	mean	stdev	mean	stdev
	none	100	100	100	100	100	100	100	100		100	0			100	0		100	0	100	0
	galactose	69.152	65.6612	63.7077	84.0323	71.4028	63.0201	64.0719	62.655		67.9629	2.54468			66.1736	1.5924		72.8184	6.10686	63.3634	1.00195
	inositol	70.6996	68.4206	68.5572	68.2976	67.8223	62.9851	59.2864	58.8028		65.6089	1.62472			69.2258	0.737973		66.3684	1.69716	59.0446	0.341983
	glucose	71.555	75.0981	69.946	79.4268	78.978	70.3191	80.7113	74.5881		75.0778	1.50887			72.1997	1.52182		76.2413	2.96395	77.6497	4.32978
	sucrose	61.3053	65.4493	57.3305	60.0808	64.3554	51.993	55.8931	50.8003		58.401	1.90234			61.3617	2.34386		58.8097	3.62486	53.3467	3.60121
	trehalose	61.1125	69.5568	59.3124	67.3889	65.01	54.6984	66.6253	52.7303		62.0543	2.17053			63.3272	3.15784		62.3658	3.89471	59.6778	9.82529
	arabinose	86.0618	97.669	85.3352	95.1149	99.4255	87.8802	90.4459	91.7033		91.7045	1.86814			89.6887	3.99567		94.1402	3.36828	91.0746	0.88913
	rhamnose	81.8195	94.2062	79.2058	90.5794	104.355	86.9449	99.5096	86.8586		90.4349	3.03451			85.0772	4.62647		93.9599	5.30257	93.1841	8.9456
	mannitol	84.2967	96.1721	79.4948	90.5483	99.1917	73.9248	87.2442	77.2909		86.0204	3.18086			86.6545	4.95656		87.8883	7.41419	82.2676	7.03806
	none with DTT	0.07911	-0.0450877	-0.00750694	0.0155328	0.554442	0.00437063	-0.293106	-0.133375						0.00883846	0.0367725		0.191449	0.181525
	glycerol	104.93	103.449	91.1981	113.545	119.933	98.9423	110.394	93.6058		104.5	3.49113			99.859	4.35146		110.807	6.21226	102	11.871
	IPTG	110.655	119.013	93.0486	115.983	151.015	115.935	138.132	113.557		119.668	6.23739			107.572	7.65227		127.645	11.6854	125.845	17.377
		% REMAINING SOLUBLE PROTEIN												%REMAINING SOLUBLE
		HEPES			PIPES			MES			TOTAL COMBINED			HEPES			PIPES			MES
		exp1	exp2	exp3	exp1	exp2	exp3	exp1	exp2		mean	SEM		2020-07-06	mean	stdev	2020-07-06	mean	stdev	mean	stdev
	none	54.4893	60.4775	59.4504	55.7505	62.1735	61.7964	57.2944	59.8655		58.9122	0.98903			58.1391	1.84879		59.9068	2.08098	58.5799	1.81804
	galactose	70.0743	74.4542	79.0186	74.8822	74.3569	74.6799	77.3864	77.2523		75.2631	0.958556			74.5157	2.5822		74.6397	0.152958	77.3194	0.0948144
	inositol	69.2449	69.6797	77.2522	72.4155	72.5623	74.7409	74.6648	76.4778		73.3798	1.03926			72.0589	2.59968		73.2396	0.751858	75.5713	1.28197
	glucose	70.4022	69.7817	74.1119	68.7055	68.016	70.0061	70.062	72.8088		70.4868	0.716226			71.4319	1.3519		68.9092	0.583462	71.4354	1.94226
	sucrose	76.883	74.8623	81.05	84.5082	74.8156	77.911	78.7272	79.9225		78.585	1.15254			77.5984	1.82172		79.0782	2.85824	79.3249	0.84521
	trehalose	72.9675	73.2912	82.3454	80.2968	70.349	75.9602	75.1051	77.1097		75.9281	1.39635			76.2014	3.07346		75.5353	2.87954	76.1074	1.41747
	arabinose	65.4065	64.1808	71.2659	68.7456	61.4556	62.4263	63.6382	65.7358		65.3569	1.15489			66.9511	2.18626		64.2092	2.28545	64.687	1.48326
	rhamnose	70.6915	65.3948	70.893	63.4313	59.6012	64.9461	61.3168	64.1867		65.0577	1.42107			68.9931	1.80009		62.6595	1.59047	62.7518	2.02934
	mannitol	72.196	64.4358	72.1884	65.4768	61.3559	66.4093	63.8183	67.6315		66.689	1.36778			69.6067	2.58546		64.414	1.55255	65.7249	2.69633
	none with DTT	100	100	100	100	100	100	100	100						100	0		100	0
	glycerol	67.7982	57.1108	64.7498	59.8416	56.6102	61.4103	56.734	60.7419		60.6246	1.42253			63.2196	3.17865		59.2873	1.41311	58.738	2.83402
	IPTG	68.8012	58.6615	64.9853	65.2161	52.6421	55.5578	53.0118	56.7061		59.4477	2.16478			64.1493	2.95678		57.8053	3.79978	54.8589	2.61224
