# Supplementary material for: A native chemical chaperone in the human eye lens
Source: eLife. 2022 Jun 20;11:e76923. doi: 10.7554/eLife.76923 (PMC9246369; doi:10.7554/eLife.76923)
Supplement: Figure 1—source data 2. [file elife-76923-fig1-data2.xlsx]

## Sheet: Legend
	This workbook containts the numerical data for aggregation traces used to create Figure 1C,D,E.
	Numerical data are presented in the left-most set of columns on each sheet.
	The balance of each sheet extracts the empirical maximum rates and apparent lag times from the numerical data, according to parameters that can be adjusted in the formulas for the relevant columns.
	On the right-most side of each sheet are plots of select aggregation curves and tangents, used to visually inspect the empirical fits and guide parameter choice to fit the true maximum rate of aggregation.

## Sheet: W42Q_inositol_!
	PIPES 10 mM pH 6.7 NaCl 150 mM inositol, X mM													PIPES 10 mM pH 6.7 NaCl 150 mM inositol, X mM														PIPES 10 mM pH 6.7 NaCl 150 mM inositol, X mM														PIPES 10 mM pH 6.7 NaCl 150 mM inositol, X mM
	0	50	75	100	125	150	175	200	225	250	300	355		0	50	75	100	125	150	175	200	225	250	300	355			0	50	75	100	125	150	175	200	225	250	300	355			0	50	75	100	125	150	175	200
0	0.000833333	0.000666667	0.000166667	0	0	0.001	0.0005	0	0	0.000833333	0.000166667	0.001		0	0	0	0	0	0	0	0	0	0	0	0			0	0	0	0	0	0	0	0	0	0	0	0			0	0	0	0	0	0	0	0
1.5	0.000833333	0.000666667	0.000166667	0	0	0	0.0005	0	0	-0.000166667	0.000166667	0		0	0	0	0	0	0	0	0	0	0	0	0			0	0	0	0	0	0	0	0	0	0	0	0			0	0	0	0	0	0	0	0
3	0.000833333	0.000666667	0.000166667	0	0	0	0.0005	0	0	-0.000166667	0.000166667	0		0	0	0	0	0	0	0	0	0	0	0	0			0	0	0	0	0	0	0	0	0	0	0	0			0	0	0	0	0	0	0	0
4.5	0.000833333	-0.000333333	0.000166667	0	0	0	0.0005	0.001	0	-0.000166667	0.000166667	0		0	0	0	0	0	0	0	0	0	0	0	0			0	0	0	0	0	0	0	0	0	0	0	0			0	0	0	0	0	0	0	0
6	0.000833333	0.000666667	0.000166667	0	0	0	0.0005	0	0	0.000833333	0.000166667	0		0	0	0	0	0	0	0	0	0	0	0	0			0	0	0	0	0	0	0	0	0	0	0	0			0	0	0	0	0	0	0	0
7.5	-0.000166667	-0.000333333	0.000166667	0	0	0	-0.0005	0	0	-0.000166667	0.000166667	0		0	0	0	0	0	0	0	0	0	0	0	0			0	0	0	0	0	0	0	0	0	0	0	0			0	0	0	0	0	0	0	0
9	-0.000166667	-0.000333333	0.000166667	0	0	0	0.0005	0	0	-0.000166667	0.000166667	0		0	0	0	0	0	0	0	0	0	0	0	0			0	0	0	0	0	0	0	0	0	0	0	0			0	0	0	0	0	0	0	0
10.5	-0.000166667	-0.000333333	-0.000833333	0	0	0	-0.0005	0	0	-0.000166667	-0.000833333	0		0	0	0	0	0	0	0	0	0	0	0	0			0	0	0	0	0	0	0	0	0	0	0	0			0	0	0	0	0	0	0	0
12	-0.000166667	0.000666667	0.000166667	0	0	0	0.0005	0	0	-0.000166667	0.000166667	0		0	0	0	0	0	0	0	0	0	0	0	0			0	0	0	0	0	0	0	0	0	0	0	0			0	0	0	0	0	0	0	0
13.5	0.000833333	-0.000333333	0.000166667	0	0	0	-0.0005	0	0	-0.000166667	0.000166667	0		0	0	0	0	0	0	0	0	0	0	0	0			0	0	0	0	0	0	0	0	0	0	0	0			0	0	0	0	0	0	0	0
15	-0.000166667	0.000666667	0.000166667	0	0	0	0.0005	0	0	0.000833333	0.000166667	0		0	0	0	0	0	0	0	0	0	0	0	0			0	0	0	0	0	0	0	0	0	0	0	0			0	0	0	0	0	0	0	0
16.5	0.000833333	0.000666667	0.000166667	0	0	0	0.0005	0	0	-0.000166667	0.000166667	0		0	0	0	0	0	0	0	0	0	0	0	0			0	0	0	0	0	0	0	0	0	0	0	0			0	0	0	0	0	0	0	0
18	0.000833333	0.000666667	0.000166667	0	0	0	0.0005	0	0	0.000833333	0.000166667	0		0	0	0	0	0	0	0	0	0	0	0	0			0	0	0	0	0	0	0	0	0	0	0	0			0	0	0	0	0	0	0	0
19.5	-0.000166667	-0.000333333	-0.000833333	0	0	0	-0.0005	0	0	-0.000166667	-0.000833333	0		0	0	0	0	0	0	0	0	0	0	0	0			0	0	0	0	0	0	0	0	0	0	0	0			0	0	0	0	0	0	0	0
21	-0.000166667	-0.000333333	0.000166667	0	0	0	-0.0005	0	-0.001	-0.000166667	-0.000833333	0		0	0	0	0	0	0	0	0	0	0	0	0			0	0	0	0	0	0	0	0	0	0	0	0			0	0	0	0	0	0	0	0
22.5	-0.000166667	0.000666667	0.000166667	0	0	0	0.0005	0	0	0.000833333	0.000166667	0		0	0	0	0	0	0	0	0	0	0	0	0			0	0	0	0	0	0	0	0	0	0	0	0			0	0	0	0	0	0	0	0
24	-0.000166667	0.000666667	0.000166667	0	0	0	0.0005	0	0	-0.000166667	-0.000833333	0		0	0	0	0	0	0	0	0	0	0	0	0			0	0	0	0	0	0	0	0	0	0	0	0			0	0	0	0	0	0	0	0
25.5	-0.000166667	0.000666667	0.000166667	0	0	0	-0.0005	0	-0.001	-0.000166667	0.000166667	0		0	0	0	0	0	0	0	0	0	0	0	0			0	0	0	0	0	0	0	0	0	0	0	0			0	0	0	0	0	0	0	0
27	-0.000166667	0.000666667	0.000166667	0	0	0	0.0005	0	0	-0.000166667	0.000166667	0		0	0	0	0	0	0	0	0	0	0	0	0			0	0	0	0	0	0	0	0	0	0	0	0			0	0	0	0	0	0	0	0
28.5	-0.000166667	-0.000333333	0.000166667	0	0	0	-0.0005	0	-0.001	-0.000166667	0.000166667	0		0	0	0	0	0	0	0	0	0	0	0	0			0	0	0	0	0	0	0	0	0	0	0	0			0	0	0	0	0	0	0	0
30	0.000833333	0.000666667	0.000166667	0	0	0	0.0005	0	0	0.000833333	0.000166667	0		0	0	0	0	0	0	0	0	0	0	0	0			0	0	0	0	0	0	0	0	0	0	0	0			0	0	0	0	0	0	0	0
31.5	-0.000166667	-0.000333333	0.000166667	0	0	0	-0.0005	0	0	-0.000166667	0.000166667	0		0	0	0	0	0	0	0	0	0	0	0	0			0	0	0	0	0	0	0	0	0	0	0	0			0	0	0	0	0	0	0	0
33	-0.000166667	-0.000333333	0.000166667	0	0	0	0.0005	0	0	-0.000166667	-0.000833333	0		0	0	0	0	0	0	0	0	0	0	0	0			0	0	0	0	0	0	0	0	0	0	0	0			0	0	0	0	0	0	0	0
34.5	0.000833333	0.000666667	0.000166667	0	0	0	0.0005	0	0	-0.000166667	0.000166667	0		0	0	0	0	0	0	0	0	0	0	0	0			0	0	0	0	0	0	0	0	0	0	0	0			0	0	0	0	0	0	0	0
36	-0.000166667	-0.000333333	0.000166667	0	0	0	0.0005	0	0	-0.000166667	0.000166667	0		0	0	0	0	0	0	0	0	0	0	0	0			0	0	0	0	0	0	0	0	0	0	0	0			0	0	0	0	0	0	0	0
37.5	-0.000166667	0.000666667	0.000166667	0	0	0	0.0005	0	0	0.000833333	0.000166667	0		0	0	0	0	0	0	0	0	0	0	0	0			0	0	0	0	0	0	0	0	0	0	0	0			0	0	0	0	0	0	0	0
39	0.000833333	0.000666667	0.000166667	0	0	0.001	0.0005	0	0	0.000833333	0.000166667	0		0	0	0	0	0	0	0	0	0	0	0	0			0	0	0	0	0	0	0	0	0	0	0	0			0	0	0	0	0	0	0	0
40.5	-0.000166667	-0.000333333	0.000166667	0	0	0	0.0005	0	0	-0.000166667	0.000166667	0		0	0	0	0	0	0	0	0	0	0	0	0			0	0	0	0	0	0	0	0	0	0	0	0			0	0	0	0	0	0	0	0
42	-0.000166667	-0.000333333	0.000166667	0	0	0	-0.0005	0	-0.001	-0.000166667	0.000166667	0		0	0	0	0	0	0	0	0	0	0	0	0			0	0	0	0	0	0	0	0	0	0	0	0			0	0	0	0	0	0	0	0
43.5	-0.000166667	0.000666667	0.000166667	0	0	0	0.0005	0	0	-0.000166667	0.000166667	0		0	0	0	0	0	0	0	0	0	0	0	0			0	0	0	0	0	0	0	0	0	0	0	0			0	0	0	0	0	0	0	0
45	0.000833333	0.000666667	0.000166667	0.001	0.001	0.001	0.0005	0.001	0	0.000833333	0.000166667	0		0	0	0	0	0	0	0	0	0	0	0	0			0	0	0	0	0	0	0	0	0	0	0	0			0	0	0	0	0	0	0	0
46.5	0.000833333	0.000666667	0.000166667	0	0	0	0.0005	0	0	0.000833333	0.000166667	0		0	0	0	0	0	0	0	0	0	0	0	0			0	0	0	0	0	0	0	0	0	0	0	0			0	0	0	0	0	0	0	0
48	-0.000166667	0.000666667	0.000166667	0	0	0	-0.0005	0	0	-0.000166667	0.000166667	0		0	0	0	0	0	0	0	0	0	0	0	0			0	0	0	0	0	0	0	0	0	0	0	0			0	0	0	0	0	0	0	0
49.5	0.000833333	0.000666667	0.000166667	0	0	0	0.0005	0	0	-0.000166667	0.000166667	0		0	0	0	0	0	0	0	0	0	0	0	0			0	0	0	0	0	0	0	0	0	0	0	0			0	0	0	0	0	0	0	0
51	-0.000166667	-0.000333333	0.000166667	0	0	0	0.0005	0	0	-0.000166667	0.000166667	0		0	0	0	0	0	0	0	0	0	0	0	0			0	0	0	0	0	0	0	0	0	0	0	0			0	0	0	0	0	0	0	0
52.5	0.000833333	0.000666667	0.000166667	0	0.001	0.001	0.0005	0	0	-0.000166667	0.000166667	0		0	0	0	0	0	0	0	0	0	0	0	0			0	0	0	0	0	0	0	0	0	0	0	0			0	0	0	0	0	0	0	0
54	-0.000166667	0.000666667	0.000166667	0	0	0.001	-0.0005	0	0	-0.000166667	0.000166667	0		0	0	0	0	0	0	0	0	0	0	0	0			0	0	0	0	0	0	0	0	0	0	0	0			0	0	0	0	0	0	0	0
55.5	-0.000166667	-0.000333333	0.000166667	0	0	0	-0.0005	0	0	-0.000166667	0.000166667	0		0	0	0	0	0	0	0	0	0	0	0	0			0	0	0	0	0	0	0	0	0	0	0	0			0	0	0	0	0	0	0	0
57	0.000833333	0.000666667	0.000166667	0	0	0.001	0.0005	0.001	0	0.000833333	0.000166667	0		0	0	0	0	0	0	0	0	0	0	0	0			0	0	0	0	0	0	0	0	0	0	0	0			0	0	0	0	0	0	0	0
58.5	0.000833333	0.000666667	0.000166667	0.001	0	0.001	0.0005	0.001	0	0.000833333	0.000166667	0		0	0	0	0	0	0	0	0	0	0	0	0			0	0	0	0	0	0	0	0	0	0	0	0			0	0	0	0	0	0	0	0
60	0.000833333	0.000666667	0.000166667	0.001	0.001	0.001	0.0005	0.001	0	0.000833333	0.000166667	0		0	0	0	0	0	0	0	0	0	0	0	0			0	0	0	0	0	0	0	0	0	0	0	0			0	0	0	0	0	0	0	0
61.5	0.000833333	0.000666667	0.000166667	0.001	0.001	0.001	0.0005	0.001	0	0.000833333	0.000166667	0		0	0	0	0	0	0	0	0	0	0	0	0			0	0	0	0	0	0	0	0	0	0	0	0			0	0	0	0	0	0	0	0
63	0.000833333	0.000666667	0.000166667	0	0	0	0.0005	0	0	-0.000166667	0.000166667	0		0	0	0	0	0	0	0	0	0	0	0	0			0	0	0	0	0	0	0	0	0	0	0	0			0	0	0	0	0	0	0	0
64.5	-0.000166667	0.000666667	0.000166667	0	0	0	0.0005	0	0	0.000833333	0.000166667	0		0	0	0	0	0	0	0	0	0	0	0	0			0	0	0	0	0	0	0	0	0	0	0	0			0	0	0	0	0	0	0	0
66	-0.000166667	0.000666667	0.000166667	0	0	0	0.0005	0	0	-0.000166667	0.000166667	0		0	0	0	0	0	0	0	0	0	0	0	0			0	0	0	0	0	0	0	0	0	0	0	0			0	0	0	0	0	0	0	0
67.5	-0.000166667	0.000666667	0.000166667	0	0	0.001	-0.0005	0	0	-0.000166667	0.000166667	0		0	0	0	0	0	0	0	0	0	0	0	0			0	0	0	0	0	0	0	0	0	0	0	0			0	0	0	0	0	0	0	0
69	0.000833333	0.000666667	0.000166667	0.001	0.001	0.001	0.0005	0.001	0	-0.000166667	0.000166667	0		0	0	0	0	0	0	0	0	0	0	0	0			0	0	0	0	0	0	0	0	0	0	0	0			0	0	0	0	0	0	0	0
70.5	-0.000166667	-0.000333333	0.000166667	0	0	0	-0.0005	0	0	-0.000166667	0.000166667	0		0	0	0	0	0	0	0	0	0	0	0	0			0	0	0	0	0	0	0	0	0	0	0	0			0	0	0	0	0	0	0	0
72	0.000833333	0.000666667	0.000166667	0	0	0	0.0005	0	0	0.000833333	0.000166667	0		0	0	0	0	0	0	0	0	0	0	0	0			0	0	0	0	0	0	0	0	0	0	0	0			0	0	0	0	0	0	0	0
73.5	0.000833333	0.000666667	0.000166667	0	0	0.001	0.0005	0	0	-0.000166667	0.000166667	0		0	0	0	0	0	0	0	0	0	0	0	0			0	0	0	0	0	0	0	0	0	0	0	0			0	0	0	0	0	0	0	0
75	0.00183333	0.000666667	0.000166667	0	0	0.001	0.0005	0.001	0	-0.000166667	0.000166667	0		0	0	0	0	0	0	0	0	0	0	0	0			0	0	0	0	0	0	0	0	0	0	0	0			0	0	0	0	0	0	0	0
76.5	0.00283333	0.000666667	0.000166667	0	0	0	0.0005	0	0	-0.000166667	0.000166667	0		0	0	0	0	0	0	0	0	0	0	0	0			0	0	0	0	0	0	0	0	0	0	0	0			0	0	0	0	0	0	0	0
78	0.00483333	0.000666667	0.000166667	0.001	0	0.001	0.0005	0	0	-0.000166667	0.000166667	0		0	0	0	0	0	0	0	0	0	0	0	0			0	0	0	0	0	0	0	0	0	0	0	0			0	0	0	0	0	0	0	0
79.5	0.00683333	0.000666667	0.000166667	0.001	0.001	0.001	0.0005	0.001	0	0.000833333	0.000166667	0		0	0	0	0	0	0	0	0	0	0	0	0			0	0	0	0	0	0	0	0	0	0	0	0			0	0	0	0	0	0	0	0
81	0.00883333	0.000666667	0.000166667	0	0	0.001	0.0005	0	0	0.000833333	0.000166667	0		0	0	0	0	0	0	0	0	0	0	0	0			0	0	0	0	0	0	0	0	0	0	0	0			0	0	0	0	0	0	0	0
82.5	0.0108333	0.000666667	0.000166667	0	0	0.001	0.0005	0	0	-0.000166667	0.000166667	0		0	0	0	0	0	0	0	0	0	0	0	0			0	0	0	0	0	0	0	0	0	0	0	0			0	0	0	0	0	0	0	0
84	0.0138333	0.00166667	0.000166667	0.001	0.001	0.001	0.0005	0.001	0	0.000833333	0.000166667	0		0	0	0	0	0	0	0	0	0	0	0	0			0	0	0	0	0	0	0	0	0	0	0	0			0	0	0	0	0	0	0	0
85.5	0.0188333	0.00166667	0.000166667	0	0	0	0.0005	0.001	0	-0.000166667	0.000166667	0		0	0	0	0	0	0	0	0	0	0	0	0			0	0	0	0	0	0	0	0	0	0	0	0			0	0	0	0	0	0	0	0
87	0.0208333	0.00166667	0.000166667	0.001	0	0.001	0.0005	0	0	-0.000166667	0.000166667	0		0	0	0	0	0	0	0	0	0	0	0	0			0	0	0	0	0	0	0	0	0	0	0	0			0	0	0	0	0	0	0	0
88.5	0.0248333	0.00266667	0.00116667	0.001	0	0.001	0.0005	0	0	0.000833333	0.000166667	0		0	0	0	0	0	0	0	0	0	0	0	0			0	0	0	0	0	0	0	0	0	0	0	0			0	0	0	0	0	0	0	0
90	0.0288333	0.00366667	0.00116667	0.001	0.001	0.001	0.0005	0.001	0	-0.000166667	0.000166667	0		0	0	0	0	0	0	0	0	0	0	0	0			0	0	0	0	0	0	0	0	0	0	0	0			0	0	0	0	0	0	0	0
91.5	0.0328333	0.00466667	0.00216667	0.001	0.001	0.001	0.0005	0	0	-0.000166667	0.000166667	0		0	0	0	0	0	0	0	0	0	0	0	0			0	0	0	0	0	0	0	0	0	0	0	0			0	0	0	0	0	0	0	0
93	0.0358333	0.00666667	0.00316667	0.001	0.001	0.001	0.0005	0.001	0	-0.000166667	0.000166667	0		0	0	0	0	0	0	0	0	0	0	0	0			0	0	0	0	0	0	0	0	0	0	0	0			0	0	0	0	0	0	0	0
94.5	0.0418333	0.00866667	0.00416667	0.002	0.001	0.001	0.0005	0.001	0	0.000833333	0.000166667	0		0	0	0	0	0	0	0	0	0	0	0	0			0	0	0	0	0	0	0	0	0	0	0	0			0	0	0	0	0	0	0	0
96	0.0488333	0.00966667	0.00516667	0.003	0.002	0.001	0.0005	0.001	0	-0.000166667	0.000166667	0		1	0	0	0	0	0	0	0	0	0	0	0			0.0488333	0	0	0	0	0	0	0	0	0	0	0			67	0	0	0	0	0	0	0
97.5	0.0528333	0.0126667	0.00616667	0.004	0.002	0.001	0.0005	0	0	0.000833333	0.000166667	0		1	0	0	0	0	0	0	0	0	0	0	0			0.0528333	0	0	0	0	0	0	0	0	0	0	0			68	0	0	0	0	0	0	0
99	0.0598333	0.0146667	0.00816667	0.005	0.003	0.001	0.0005	0	0	-0.000166667	0.000166667	0		1	0	0	0	0	0	0	0	0	0	0	0			0.0598333	0	0	0	0	0	0	0	0	0	0	0			69	0	0	0	0	0	0	0
100.5	0.0648333	0.0166667	0.00916667	0.007	0.004	0.002	0.0005	0.001	0	0.000833333	0.000166667	0		1	0	0	0	0	0	0	0	0	0	0	0			0.0648333	0	0	0	0	0	0	0	0	0	0	0			70	0	0	0	0	0	0	0
102	0.0708333	0.0196667	0.0121667	0.008	0.005	0.002	0.0005	0.001	0	-0.000166667	0.000166667	0		1	0	0	0	0	0	0	0	0	0	0	0			0.0708333	0	0	0	0	0	0	0	0	0	0	0			71	0	0	0	0	0	0	0
103.5	0.0758333	0.0226667	0.0141667	0.01	0.007	0.003	0.0015	0.001	0	0.000833333	0.000166667	0		1	0	0	0	0	0	0	0	0	0	0	0			0.0758333	0	0	0	0	0	0	0	0	0	0	0			72	0	0	0	0	0	0	0
105	0.0838333	0.0256667	0.0151667	0.012	0.007	0.004	0.0015	0.001	0	0.000833333	0.000166667	0		1	0	0	0	0	0	0	0	0	0	0	0			0.0838333	0	0	0	0	0	0	0	0	0	0	0			73	0	0	0	0	0	0	0
106.5	0.0918333	0.0296667	0.0181667	0.015	0.008	0.004	0.0015	0.001	0	0.000833333	0.000166667	0		1	0	0	0	0	0	0	0	0	0	0	0			0.0918333	0	0	0	0	0	0	0	0	0	0	0			74	0	0	0	0	0	0	0
108	0.0958333	0.0326667	0.0231667	0.017	0.01	0.005	0.0025	0.001	0	0.000833333	0.000166667	0		1	0	0	0	0	0	0	0	0	0	0	0			0.0958333	0	0	0	0	0	0	0	0	0	0	0			75	0	0	0	0	0	0	0
109.5	0.0978333	0.0376667	0.0261667	0.019	0.013	0.006	0.0025	0.001	0	0.000833333	0.000166667	0		1	0	0	0	0	0	0	0	0	0	0	0			0.0978333	0	0	0	0	0	0	0	0	0	0	0			76	0	0	0	0	0	0	0
111	0.108833	0.0396667	0.0291667	0.022	0.014	0.008	0.0035	0.002	0	0.000833333	0.000166667	0		1	0	0	0	0	0	0	0	0	0	0	0			0.108833	0	0	0	0	0	0	0	0	0	0	0			77	0	0	0	0	0	0	0
112.5	0.113833	0.0436667	0.0311667	0.024	0.016	0.009	0.0035	0.002	0	0.000833333	0.000166667	0		1	0	0	0	0	0	0	0	0	0	0	0			0.113833	0	0	0	0	0	0	0	0	0	0	0			78	0	0	0	0	0	0	0
114	0.118833	0.0496667	0.0351667	0.027	0.019	0.01	0.0045	0.003	0	-0.000166667	0.000166667	0		1	1	0	0	0	0	0	0	0	0	0	0			0.118833	0.0496667	0	0	0	0	0	0	0	0	0	0			79	79	0	0	0	0	0	0
115.5	0.121833	0.0526667	0.0391667	0.03	0.021	0.012	0.0055	0.003	0	-0.000166667	0.000166667	0		1	1	0	0	0	0	0	0	0	0	0	0			0.121833	0.0526667	0	0	0	0	0	0	0	0	0	0			80	80	0	0	0	0	0	0
117	0.127833	0.0566667	0.0411667	0.034	0.025	0.014	0.0075	0.004	0	0.000833333	0.000166667	0		1	1	0	0	0	0	0	0	0	0	0	0			0.127833	0.0566667	0	0	0	0	0	0	0	0	0	0			81	81	0	0	0	0	0	0
118.5	0.135833	0.0626667	0.0441667	0.037	0.028	0.016	0.0085	0.005	0.001	-0.000166667	0.000166667	0		1	1	0	0	0	0	0	0	0	0	0	0			0.135833	0.0626667	0	0	0	0	0	0	0	0	0	0			82	82	0	0	0	0	0	0
120	0.142833	0.0676667	0.0501667	0.042	0.03	0.017	0.0105	0.006	0.001	-0.000166667	0.000166667	0		1	1	1	0	0	0	0	0	0	0	0	0			0.142833	0.0676667	0.0501667	0	0	0	0	0	0	0	0	0			83	83	83	0	0	0	0	0
121.5	0.145833	0.0716667	0.0541667	0.046	0.032	0.02	0.0115	0.007	0.002	0.000833333	0.000166667	0		1	1	1	1	0	0	0	0	0	0	0	0			0.145833	0.0716667	0.0541667	0.046	0	0	0	0	0	0	0	0			84	84	84	84	0	0	0	0
123	0.148833	0.0746667	0.0581667	0.049	0.035	0.023	0.0135	0.008	0.002	0.000833333	0.000166667	0		1	1	1	1	0	0	0	0	0	0	0	0			0.148833	0.0746667	0.0581667	0.049	0	0	0	0	0	0	0	0			85	85	85	85	0	0	0	0
124.5	0.155833	0.0766667	0.0611667	0.054	0.039	0.026	0.0145	0.008	0.002	0.000833333	0.000166667	0		1	1	1	1	0	0	0	0	0	0	0	0			0.155833	0.0766667	0.0611667	0.054	0	0	0	0	0	0	0	0			86	86	86	86	0	0	0	0
126	0.162833	0.0836667	0.0641667	0.057	0.043	0.029	0.0165	0.01	0.003	0.000833333	0.000166667	0		1	1	1	1	0	0	0	0	0	0	0	0			0.162833	0.0836667	0.0641667	0.057	0	0	0	0	0	0	0	0			87	87	87	87	0	0	0	0
127.5	0.163833	0.0906667	0.0701667	0.06	0.046	0.031	0.0185	0.012	0.004	0.00183333	0.000166667	0		1	1	1	1	1	0	0	0	0	0	0	0			0.163833	0.0906667	0.0701667	0.06	0.046	0	0	0	0	0	0	0			88	88	88	88	88	0	0	0
129	0.171833	0.0956667	0.0761667	0.065	0.049	0.034	0.0205	0.013	0.005	0.000833333	0.000166667	0		1	1	1	1	1	0	0	0	0	0	0	0			0.171833	0.0956667	0.0761667	0.065	0.049	0	0	0	0	0	0	0			89	89	89	89	89	0	0	0
130.5	0.179833	0.0986667	0.0791667	0.068	0.053	0.035	0.0225	0.015	0.005	0.00183333	0.000166667	0		1	1	1	1	1	0	0	0	0	0	0	0			0.179833	0.0986667	0.0791667	0.068	0.053	0	0	0	0	0	0	0			90	90	90	90	90	0	0	0
132	0.184833	0.102667	0.0831667	0.074	0.056	0.038	0.0245	0.016	0.006	0.00183333	0.000166667	0		1	1	1	1	1	0	0	0	0	0	0	0			0.184833	0.102667	0.0831667	0.074	0.056	0	0	0	0	0	0	0			91	91	91	91	91	0	0	0
133.5	0.187833	0.107667	0.0871667	0.078	0.062	0.041	0.0285	0.019	0.007	0.00183333	0.000166667	0		1	1	1	1	1	0	0	0	0	0	0	0			0.187833	0.107667	0.0871667	0.078	0.062	0	0	0	0	0	0	0			92	92	92	92	92	0	0	0
135	0.191833	0.111667	0.0891667	0.081	0.066	0.043	0.0315	0.02	0.008	0.00283333	0.000166667	0		1	1	1	1	1	0	0	0	0	0	0	0			0.191833	0.111667	0.0891667	0.081	0.066	0	0	0	0	0	0	0			93	93	93	93	93	0	0	0
136.5	0.195833	0.114667	0.0951667	0.085	0.066	0.046	0.0325	0.022	0.009	0.00383333	0.000166667	0		1	1	1	1	1	1	0	0	0	0	0	0			0.195833	0.114667	0.0951667	0.085	0.066	0.046	0	0	0	0	0	0			94	94	94	94	94	94	0	0
138	0.198833	0.121667	0.0971667	0.088	0.068	0.051	0.0355	0.025	0.01	0.00383333	0.00116667	0		1	1	1	1	1	1	0	0	0	0	0	0			0.198833	0.121667	0.0971667	0.088	0.068	0.051	0	0	0	0	0	0			95	95	95	95	95	95	0	0
139.5	0.201833	0.124667	0.100167	0.092	0.074	0.053	0.0385	0.025	0.012	0.00483333	0.00116667	0		1	1	1	1	1	1	0	0	0	0	0	0			0.201833	0.124667	0.100167	0.092	0.074	0.053	0	0	0	0	0	0			96	96	96	96	96	96	0	0
141	0.206833	0.124667	0.107167	0.098	0.079	0.056	0.0405	0.028	0.013	0.00583333	0.00116667	0		1	1	1	1	1	1	0	0	0	0	0	0			0.206833	0.124667	0.107167	0.098	0.079	0.056	0	0	0	0	0	0			97	97	97	97	97	97	0	0
142.5	0.209833	0.129667	0.111167	0.102	0.081	0.06	0.0445	0.03	0.015	0.00683333	0.00116667	0		1	1	1	1	1	1	0	0	0	0	0	0			0.209833	0.129667	0.111167	0.102	0.081	0.06	0	0	0	0	0	0			98	98	98	98	98	98	0	0
144	0.214833	0.132667	0.115167	0.102	0.082	0.063	0.0485	0.033	0.016	0.00783333	0.00116667	0		1	1	1	1	1	1	1	0	0	0	0	0			0.214833	0.132667	0.115167	0.102	0.082	0.063	0.0485	0	0	0	0	0			99	99	99	99	99	99	99	0
145.5	0.219833	0.136667	0.119167	0.104	0.085	0.067	0.0495	0.036	0.017	0.00883333	0.00216667	0		1	1	1	1	1	1	1	0	0	0	0	0			0.219833	0.136667	0.119167	0.104	0.085	0.067	0.0495	0	0	0	0	0			100	100	100	100	100	100	100	0
147	0.219833	0.142667	0.123167	0.109	0.091	0.07	0.0525	0.038	0.019	0.00983333	0.00216667	0		1	1	1	1	1	1	1	0	0	0	0	0			0.219833	0.142667	0.123167	0.109	0.091	0.07	0.0525	0	0	0	0	0			101	101	101	101	101	101	101	0
148.5	0.224833	0.147667	0.127167	0.113	0.095	0.074	0.0545	0.039	0.021	0.0108333	0.00216667	0		1	1	1	1	1	1	1	0	0	0	0	0			0.224833	0.147667	0.127167	0.113	0.095	0.074	0.0545	0	0	0	0	0			102	102	102	102	102	102	102	0
150	0.229833	0.150667	0.132167	0.118	0.099	0.076	0.0595	0.044	0.022	0.0128333	0.00316667	0.001		1	1	1	1	1	1	1	0	0	0	0	0			0.229833	0.150667	0.132167	0.118	0.099	0.076	0.0595	0	0	0	0	0			103	103	103	103	103	103	103	0
151.5	0.227833	0.149667	0.133167	0.122	0.103	0.08	0.0605	0.047	0.024	0.0128333	0.00316667	0		1	1	1	1	1	1	1	1	0	0	0	0			0.227833	0.149667	0.133167	0.122	0.103	0.08	0.0605	0.047	0	0	0	0			104	104	104	104	104	104	104	104
153	0.231833	0.156667	0.136167	0.123	0.107	0.084	0.0635	0.05	0.026	0.0128333	0.00416667	0.001		1	1	1	1	1	1	1	1	0	0	0	0			0.231833	0.156667	0.136167	0.123	0.107	0.084	0.0635	0.05	0	0	0	0			105	105	105	105	105	105	105	105
154.5	0.234833	0.161667	0.136167	0.128	0.111	0.086	0.0675	0.053	0.028	0.0148333	0.00516667	0.001		1	1	1	1	1	1	1	1	0	0	0	0			0.234833	0.161667	0.136167	0.128	0.111	0.086	0.0675	0.053	0	0	0	0			106	106	106	106	106	106	106	106
156	0.240833	0.162667	0.144167	0.13	0.114	0.089	0.0705	0.055	0.03	0.0158333	0.00516667	0.001		1	1	1	1	1	1	1	1	0	0	0	0			0.240833	0.162667	0.144167	0.13	0.114	0.089	0.0705	0.055	0	0	0	0			107	107	107	107	107	107	107	107
157.5	0.246833	0.165667	0.146167	0.134	0.118	0.093	0.0725	0.058	0.032	0.0178333	0.00616667	0.002		1	1	1	1	1	1	1	1	0	0	0	0			0.246833	0.165667	0.146167	0.134	0.118	0.093	0.0725	0.058	0	0	0	0			108	108	108	108	108	108	108	108
159	0.248833	0.170667	0.148167	0.137	0.119	0.096	0.0755	0.061	0.035	0.0198333	0.00716667	0.002		1	1	1	1	1	1	1	1	0	0	0	0			0.248833	0.170667	0.148167	0.137	0.119	0.096	0.0755	0.061	0	0	0	0			109	109	109	109	109	109	109	109
160.5	0.249833	0.170667	0.150167	0.141	0.121	0.1	0.0785	0.064	0.037	0.0208333	0.00716667	0.002		1	1	1	1	1	1	1	1	0	0	0	0			0.249833	0.170667	0.150167	0.141	0.121	0.1	0.0785	0.064	0	0	0	0			110	110	110	110	110	110	110	110
162	0.254833	0.173667	0.154167	0.143	0.124	0.103	0.0825	0.066	0.038	0.0218333	0.00816667	0.002		1	1	1	1	1	1	1	1	0	0	0	0			0.254833	0.173667	0.154167	0.143	0.124	0.103	0.0825	0.066	0	0	0	0			111	111	111	111	111	111	111	111
163.5	0.259833	0.180667	0.159167	0.145	0.127	0.105	0.0855	0.068	0.041	0.0238333	0.00916667	0.002		1	1	1	1	1	1	1	1	0	0	0	0			0.259833	0.180667	0.159167	0.145	0.127	0.105	0.0855	0.068	0	0	0	0			112	112	112	112	112	112	112	112
165	0.263833	0.182667	0.163167	0.147	0.129	0.106	0.0885	0.071	0.042	0.0258333	0.0101667	0.003		1	1	1	1	1	1	1	1	0	0	0	0			0.263833	0.182667	0.163167	0.147	0.129	0.106	0.0885	0.071	0	0	0	0			113	113	113	113	113	113	113	113
166.5	0.267833	0.185667	0.166167	0.152	0.132	0.11	0.0925	0.076	0.045	0.0278333	0.0111667	0.003		1	1	1	1	1	1	1	1	1	0	0	0			0.267833	0.185667	0.166167	0.152	0.132	0.11	0.0925	0.076	0.045	0	0	0			114	114	114	114	114	114	114	114
168	0.267833	0.189667	0.168167	0.156	0.135	0.114	0.0945	0.077	0.048	0.0288333	0.0121667	0.004		1	1	1	1	1	1	1	1	1	0	0	0			0.267833	0.189667	0.168167	0.156	0.135	0.114	0.0945	0.077	0.048	0	0	0			115	115	115	115	115	115	115	115
169.5	0.272833	0.190667	0.170167	0.161	0.136	0.115	0.0955	0.077	0.05	0.0308333	0.0131667	0.004		1	1	1	1	1	1	1	1	1	0	0	0			0.272833	0.190667	0.170167	0.161	0.136	0.115	0.0955	0.077	0.05	0	0	0			116	116	116	116	116	116	116	116
171	0.277833	0.193667	0.172167	0.164	0.141	0.116	0.0995	0.082	0.052	0.0328333	0.0141667	0.005		1	1	1	1	1	1	1	1	1	0	0	0			0.277833	0.193667	0.172167	0.164	0.141	0.116	0.0995	0.082	0.052	0	0	0			117	117	117	117	117	117	117	117
172.5	0.281833	0.197667	0.175167	0.165	0.147	0.12	0.1035	0.086	0.054	0.0338333	0.0151667	0.005		1	1	1	1	1	1	1	1	1	0	0	0			0.281833	0.197667	0.175167	0.165	0.147	0.12	0.1035	0.086	0.054	0	0	0			118	118	118	118	118	118	118	118
174	0.282833	0.200667	0.176167	0.167	0.147	0.125	0.1055	0.088	0.057	0.0368333	0.0161667	0.006		1	1	1	1	1	1	1	1	1	0	0	0			0.282833	0.200667	0.176167	0.167	0.147	0.125	0.1055	0.088	0.057	0	0	0			119	119	119	119	119	119	119	119
175.5	0.285833	0.205667	0.180167	0.172	0.15	0.126	0.1065	0.091	0.059	0.0388333	0.0171667	0.006		1	1	1	1	1	1	1	1	1	0	0	0			0.285833	0.205667	0.180167	0.172	0.15	0.126	0.1065	0.091	0.059	0	0	0			120	120	120	120	120	120	120	120
177	0.282833	0.206667	0.182167	0.172	0.155	0.13	0.1095	0.094	0.061	0.0398333	0.0181667	0.007		1	1	1	1	1	1	1	1	1	0	0	0			0.282833	0.206667	0.182167	0.172	0.155	0.13	0.1095	0.094	0.061	0	0	0			121	121	121	121	121	121	121	121
178.5	0.285833	0.205667	0.183167	0.174	0.157	0.132	0.1125	0.096	0.063	0.0418333	0.0191667	0.008		1	1	1	1	1	1	1	1	1	0	0	0			0.285833	0.205667	0.183167	0.174	0.157	0.132	0.1125	0.096	0.063	0	0	0			122	122	122	122	122	122	122	122
180	0.292833	0.210667	0.184167	0.177	0.158	0.132	0.1165	0.097	0.065	0.0438333	0.0211667	0.008		1	1	1	1	1	1	1	1	1	0	0	0			0.292833	0.210667	0.184167	0.177	0.158	0.132	0.1165	0.097	0.065	0	0	0			123	123	123	123	123	123	123	123
181.5	0.297833	0.214667	0.194167	0.177	0.16	0.137	0.1175	0.1	0.069	0.0448333	0.0231667	0.009		1	1	1	1	1	1	1	1	1	0	0	0			0.297833	0.214667	0.194167	0.177	0.16	0.137	0.1175	0.1	0.069	0	0	0			124	124	124	124	124	124	124	124
183	0.302833	0.216667	0.196167	0.182	0.162	0.142	0.1205	0.101	0.069	0.0458333	0.0241667	0.01		1	1	1	1	1	1	1	1	1	1	0	0			0.302833	0.216667	0.196167	0.182	0.162	0.142	0.1205	0.101	0.069	0.0458333	0	0			125	125	125	125	125	125	125	125
184.5	0.303833	0.219667	0.197167	0.186	0.165	0.143	0.1235	0.103	0.071	0.0478333	0.0251667	0.01		1	1	1	1	1	1	1	1	1	1	0	0			0.303833	0.219667	0.197167	0.186	0.165	0.143	0.1235	0.103	0.071	0.0478333	0	0			126	126	126	126	126	126	126	126
186	0.303833	0.217667	0.197167	0.188	0.17	0.143	0.1265	0.106	0.074	0.0508333	0.0261667	0.011		1	1	1	1	1	1	1	1	1	1	0	0			0.303833	0.217667	0.197167	0.188	0.17	0.143	0.1265	0.106	0.074	0.0508333	0	0			127	127	127	127	127	127	127	127
187.5	0.305833	0.220667	0.198167	0.19	0.171	0.146	0.1255	0.109	0.077	0.0528333	0.0291667	0.012		1	1	1	1	1	1	1	1	1	1	0	0			0.305833	0.220667	0.198167	0.19	0.171	0.146	0.1255	0.109	0.077	0.0528333	0	0			128	128	128	128	128	128	128	128
189	0.308833	0.226667	0.203167	0.192	0.175	0.147	0.1285	0.11	0.078	0.0538333	0.0291667	0.013		1	1	1	1	1	1	1	1	1	1	0	0			0.308833	0.226667	0.203167	0.192	0.175	0.147	0.1285	0.11	0.078	0.0538333	0	0			129	129	129	129	129	129	129	129
190.5	0.311833	0.227667	0.203167	0.194	0.177	0.148	0.1325	0.113	0.079	0.0558333	0.0311667	0.014		1	1	1	1	1	1	1	1	1	1	0	0			0.311833	0.227667	0.203167	0.194	0.177	0.148	0.1325	0.113	0.079	0.0558333	0	0			130	130	130	130	130	130	130	130
192	0.309833	0.228667	0.205167	0.197	0.179	0.15	0.1335	0.115	0.082	0.0598333	0.0321667	0.015		1	1	1	1	1	1	1	1	1	1	0	0			0.309833	0.228667	0.205167	0.197	0.179	0.15	0.1335	0.115	0.082	0.0598333	0	0			131	131	131	131	131	131	131	131
193.5	0.318833	0.228667	0.206167	0.2	0.181	0.153	0.1335	0.118	0.086	0.0618333	0.0331667	0.016		1	1	1	1	1	1	1	1	1	1	0	0			0.318833	0.228667	0.206167	0.2	0.181	0.153	0.1335	0.118	0.086	0.0618333	0	0			132	132	132	132	132	132	132	132
195	0.318833	0.232667	0.211167	0.2	0.183	0.153	0.1375	0.121	0.087	0.0638333	0.0361667	0.017		1	1	1	1	1	1	1	1	1	1	0	0			0.318833	0.232667	0.211167	0.2	0.183	0.153	0.1375	0.121	0.087	0.0638333	0	0			133	133	133	133	133	133	133	133
196.5	0.317833	0.235667	0.215167	0.2	0.185	0.158	0.1385	0.123	0.09	0.0638333	0.0371667	0.018		1	1	1	1	1	1	1	1	1	1	0	0			0.317833	0.235667	0.215167	0.2	0.185	0.158	0.1385	0.123	0.09	0.0638333	0	0			134	134	134	134	134	134	134	134
198	0.318833	0.237667	0.215167	0.203	0.185	0.16	0.1415	0.127	0.091	0.0668333	0.0381667	0.02		1	1	1	1	1	1	1	1	1	1	0	0			0.318833	0.237667	0.215167	0.203	0.185	0.16	0.1415	0.127	0.091	0.0668333	0	0			135	135	135	135	135	135	135	135
199.5	0.323833	0.238667	0.217167	0.207	0.188	0.162	0.1445	0.129	0.094	0.0698333	0.0401667	0.02		1	1	1	1	1	1	1	1	1	1	0	0			0.323833	0.238667	0.217167	0.207	0.188	0.162	0.1445	0.129	0.094	0.0698333	0	0			136	136	136	136	136	136	136	136
201	0.328833	0.241667	0.223167	0.208	0.193	0.167	0.1465	0.13	0.096	0.0718333	0.0421667	0.021		1	1	1	1	1	1	1	1	1	1	0	0			0.328833	0.241667	0.223167	0.208	0.193	0.167	0.1465	0.13	0.096	0.0718333	0	0			137	137	137	137	137	137	137	137
202.5	0.328833	0.242667	0.225167	0.209	0.195	0.17	0.1495	0.132	0.098	0.0718333	0.0421667	0.022		1	1	1	1	1	1	1	1	1	1	0	0			0.328833	0.242667	0.225167	0.209	0.195	0.17	0.1495	0.132	0.098	0.0718333	0	0			138	138	138	138	138	138	138	138
204	0.332833	0.243667	0.224167	0.21	0.197	0.17	0.1495	0.134	0.099	0.0738333	0.0441667	0.024		1	1	1	1	1	1	1	1	1	1	0	0			0.332833	0.243667	0.224167	0.21	0.197	0.17	0.1495	0.134	0.099	0.0738333	0	0			139	139	139	139	139	139	139	139
205.5	0.334833	0.249667	0.224167	0.213	0.2	0.17	0.1515	0.135	0.101	0.0758333	0.0441667	0.025		1	1	1	1	1	1	1	1	1	1	0	0			0.334833	0.249667	0.224167	0.213	0.2	0.17	0.1515	0.135	0.101	0.0758333	0	0			140	140	140	140	140	140	140	140
207	0.331833	0.252667	0.228167	0.214	0.199	0.171	0.1555	0.138	0.104	0.0788333	0.0471667	0.026		1	1	1	1	1	1	1	1	1	1	1	0			0.331833	0.252667	0.228167	0.214	0.199	0.171	0.1555	0.138	0.104	0.0788333	0.0471667	0			141	141	141	141	141	141	141	141
208.5	0.328833	0.254667	0.231167	0.216	0.201	0.173	0.1585	0.138	0.104	0.0818333	0.0491667	0.027		1	1	1	1	1	1	1	1	1	1	1	0			0.328833	0.254667	0.231167	0.216	0.201	0.173	0.1585	0.138	0.104	0.0818333	0.0491667	0			142	142	142	142	142	142	142	142
210	0.340833	0.254667	0.236167	0.22	0.202	0.176	0.1615	0.143	0.106	0.0818333	0.0511667	0.029		1	1	1	1	1	1	1	1	1	1	1	0			0.340833	0.254667	0.236167	0.22	0.202	0.176	0.1615	0.143	0.106	0.0818333	0.0511667	0			143	143	143	143	143	143	143	143
211.5	0.343833	0.258667	0.238167	0.226	0.205	0.177	0.1645	0.144	0.11	0.0848333	0.0521667	0.029		1	1	1	1	1	1	1	1	1	1	1	0			0.343833	0.258667	0.238167	0.226	0.205	0.177	0.1645	0.144	0.11	0.0848333	0.0521667	0			144	144	144	144	144	144	144	144
213	0.350833	0.257667	0.238167	0.227	0.206	0.179	0.1635	0.146	0.11	0.0858333	0.0541667	0.03		1	1	1	1	1	1	1	1	1	1	1	0			0.350833	0.257667	0.238167	0.227	0.206	0.179	0.1635	0.146	0.11	0.0858333	0.0541667	0			145	145	145	145	145	145	145	145
214.5	0.346833	0.259667	0.239167	0.23	0.208	0.183	0.1665	0.146	0.11	0.0868333	0.0551667	0.032		1	1	1	1	1	1	1	1	1	1	1	0			0.346833	0.259667	0.239167	0.23	0.208	0.183	0.1665	0.146	0.11	0.0868333	0.0551667	0			146	146	146	146	146	146	146	146
216	0.353833	0.261667	0.242167	0.228	0.21	0.184	0.1675	0.146	0.112	0.0898333	0.0571667	0.033		1	1	1	1	1	1	1	1	1	1	1	0			0.353833	0.261667	0.242167	0.228	0.21	0.184	0.1675	0.146	0.112	0.0898333	0.0571667	0			147	147	147	147	147	147	147	147
217.5	0.358833	0.266667	0.244167	0.232	0.215	0.188	0.1695	0.147	0.115	0.0928333	0.0581667	0.034		1	1	1	1	1	1	1	1	1	1	1	0			0.358833	0.266667	0.244167	0.232	0.215	0.188	0.1695	0.147	0.115	0.0928333	0.0581667	0			148	148	148	148	148	148	148	148
219	0.358833	0.271667	0.246167	0.233	0.213	0.188	0.1695	0.148	0.117	0.0928333	0.0591667	0.036		1	1	1	1	1	1	1	1	1	1	1	0			0.358833	0.271667	0.246167	0.233	0.213	0.188	0.1695	0.148	0.117	0.0928333	0.0591667	0			149	149	149	149	149	149	149	149
220.5	0.362833	0.269667	0.247167	0.237	0.217	0.189	0.1735	0.152	0.119	0.0928333	0.0621667	0.037		1	1	1	1	1	1	1	1	1	1	1	0			0.362833	0.269667	0.247167	0.237	0.217	0.189	0.1735	0.152	0.119	0.0928333	0.0621667	0			150	150	150	150	150	150	150	150
222	0.364833	0.272667	0.247167	0.238	0.217	0.194	0.1715	0.152	0.12	0.0938333	0.0631667	0.038		1	1	1	1	1	1	1	1	1	1	1	0			0.364833	0.272667	0.247167	0.238	0.217	0.194	0.1715	0.152	0.12	0.0938333	0.0631667	0			151	151	151	151	151	151	151	151
223.5	0.368833	0.273667	0.247167	0.24	0.219	0.192	0.1745	0.155	0.122	0.0958333	0.0641667	0.04		1	1	1	1	1	1	1	1	1	1	1	0			0.368833	0.273667	0.247167	0.24	0.219	0.192	0.1745	0.155	0.122	0.0958333	0.0641667	0			152	152	152	152	152	152	152	152
225	0.369833	0.272667	0.252167	0.241	0.22	0.191	0.1755	0.159	0.122	0.0988333	0.0661667	0.041		1	1	1	1	1	1	1	1	1	1	1	0			0.369833	0.272667	0.252167	0.241	0.22	0.191	0.1755	0.159	0.122	0.0988333	0.0661667	0			153	153	153	153	153	153	153	153
226.5	0.365833	0.279667	0.253167	0.241	0.222	0.195	0.1785	0.157	0.125	0.101833	0.0671667	0.042		1	1	1	1	1	1	1	1	1	1	1	0			0.365833	0.279667	0.253167	0.241	0.222	0.195	0.1785	0.157	0.125	0.101833	0.0671667	0			154	154	154	154	154	154	154	154
228	0.363833	0.280667	0.255167	0.244	0.224	0.197	0.1815	0.158	0.127	0.103833	0.0691667	0.043		1	1	1	1	1	1	1	1	1	1	1	0			0.363833	0.280667	0.255167	0.244	0.224	0.197	0.1815	0.158	0.127	0.103833	0.0691667	0			155	155	155	155	155	155	155	155
229.5	0.367833	0.280667	0.257167	0.248	0.226	0.2	0.1845	0.164	0.129	0.104833	0.0711667	0.045		1	1	1	1	1	1	1	1	1	1	1	1			0.367833	0.280667	0.257167	0.248	0.226	0.2	0.1845	0.164	0.129	0.104833	0.0711667	0.045			156	156	156	156	156	156	156	156
231	0.376833	0.283667	0.261167	0.244	0.231	0.199	0.1845	0.163	0.129	0.105833	0.0731667	0.046		1	1	1	1	1	1	1	1	1	1	1	1			0.376833	0.283667	0.261167	0.244	0.231	0.199	0.1845	0.163	0.129	0.105833	0.0731667	0.046			157	157	157	157	157	157	157	157
232.5	0.373833	0.285667	0.261167	0.245	0.231	0.204	0.1855	0.166	0.13	0.105833	0.0751667	0.047		1	1	1	1	1	1	1	1	1	1	1	1			0.373833	0.285667	0.261167	0.245	0.231	0.204	0.1855	0.166	0.13	0.105833	0.0751667	0.047			158	158	158	158	158	158	158	158
234	0.377833	0.288667	0.264167	0.248	0.231	0.203	0.1895	0.169	0.133	0.108833	0.0761667	0.048		1	1	1	1	1	1	1	1	1	1	1	1			0.377833	0.288667	0.264167	0.248	0.231	0.203	0.1895	0.169	0.133	0.108833	0.0761667	0.048			159	159	159	159	159	159	159	159
235.5	0.381833	0.289667	0.262167	0.254	0.238	0.208	0.1905	0.171	0.134	0.110833	0.0771667	0.05		1	1	1	1	1	1	1	1	1	1	1	1			0.381833	0.289667	0.262167	0.254	0.238	0.208	0.1905	0.171	0.134	0.110833	0.0771667	0.05			160	160	160	160	160	160	160	160
237	0.383833	0.290667	0.264167	0.253	0.239	0.212	0.1915	0.171	0.136	0.112833	0.0791667	0.051		1	1	1	1	1	1	1	1	1	1	1	1			0.383833	0.290667	0.264167	0.253	0.239	0.212	0.1915	0.171	0.136	0.112833	0.0791667	0.051			161	161	161	161	161	161	161	161
238.5	0.388833	0.288667	0.266167	0.255	0.236	0.214	0.1925	0.171	0.139	0.114833	0.0811667	0.053		1	1	1	1	1	1	1	1	1	1	1	1			0.388833	0.288667	0.266167	0.255	0.236	0.214	0.1925	0.171	0.139	0.114833	0.0811667	0.053			162	162	162	162	162	162	162	162
240	0.393833	0.294667	0.266167	0.259	0.238	0.212	0.1935	0.172	0.14	0.115833	0.0821667	0.053		1	1	1	1	1	1	1	1	1	1	1	1			0.393833	0.294667	0.266167	0.259	0.238	0.212	0.1935	0.172	0.14	0.115833	0.0821667	0.053			163	163	163	163	163	163	163	163
241.5	0.391833	0.299667	0.270167	0.258	0.241	0.214	0.1975	0.174	0.141	0.116833	0.0831667	0.055		1	1	1	1	1	1	1	1	1	1	1	1			0.391833	0.299667	0.270167	0.258	0.241	0.214	0.1975	0.174	0.141	0.116833	0.0831667	0.055			164	164	164	164	164	164	164	164
243	0.392833	0.298667	0.268167	0.264	0.242	0.217	0.1955	0.178	0.14	0.117833	0.0841667	0.056		1	1	1	1	1	1	1	1	1	1	1	1			0.392833	0.298667	0.268167	0.264	0.242	0.217	0.1955	0.178	0.14	0.117833	0.0841667	0.056			165	165	165	165	165	165	165	165
244.5	0.398833	0.298667	0.271167	0.265	0.245	0.218	0.1965	0.175	0.142	0.120833	0.0861667	0.057		1	1	1	1	1	1	1	1	1	1	1	1			0.398833	0.298667	0.271167	0.265	0.245	0.218	0.1965	0.175	0.142	0.120833	0.0861667	0.057			166	166	166	166	166	166	166	166
246	0.405833	0.300667	0.272167	0.267	0.245	0.22	0.1975	0.18	0.144	0.120833	0.0871667	0.06		1	1	1	1	1	1	1	1	1	1	1	1			0.405833	0.300667	0.272167	0.267	0.245	0.22	0.1975	0.18	0.144	0.120833	0.0871667	0.06			167	167	167	167	167	167	167	167
247.5	0.407833	0.307667	0.272167	0.269	0.247	0.22	0.2015	0.179	0.143	0.120833	0.0901667	0.061		1	1	1	1	1	1	1	1	1	1	1	1			0.407833	0.307667	0.272167	0.269	0.247	0.22	0.2015	0.179	0.143	0.120833	0.0901667	0.061			168	168	168	168	168	168	168	168
249	0.410833	0.307667	0.280167	0.268	0.247	0.221	0.2005	0.182	0.149	0.124833	0.0901667	0.061		1	1	1	1	1	1	1	1	1	1	1	1			0.410833	0.307667	0.280167	0.268	0.247	0.221	0.2005	0.182	0.149	0.124833	0.0901667	0.061			169	169	169	169	169	169	169	169
250.5	0.409833	0.307667	0.280167	0.27	0.252	0.22	0.2015	0.182	0.148	0.126833	0.0901667	0.063		1	1	1	1	1	1	1	1	1	1	1	1			0.409833	0.307667	0.280167	0.27	0.252	0.22	0.2015	0.182	0.148	0.126833	0.0901667	0.063			170	170	170	170	170	170	170	170
252	0.409833	0.310667	0.283167	0.272	0.251	0.221	0.2015	0.18	0.149	0.126833	0.0911667	0.063		1	1	1	1	1	1	1	1	1	1	1	1			0.409833	0.310667	0.283167	0.272	0.251	0.221	0.2015	0.18	0.149	0.126833	0.0911667	0.063			171	171	171	171	171	171	171	171
253.5	0.410833	0.311667	0.283167	0.272	0.254	0.223	0.2035	0.184	0.149	0.127833	0.0931667	0.064		1	1	1	1	1	1	1	1	1	1	1	1			0.410833	0.311667	0.283167	0.272	0.254	0.223	0.2035	0.184	0.149	0.127833	0.0931667	0.064			172	172	172	172	172	172	172	172
255	0.412833	0.310667	0.287167	0.273	0.255	0.227	0.2085	0.187	0.151	0.130833	0.0951667	0.065		1	1	1	1	1	1	1	1	1	1	1	1			0.412833	0.310667	0.287167	0.273	0.255	0.227	0.2085	0.187	0.151	0.130833	0.0951667	0.065			173	173	173	173	173	173	173	173
256.5	0.417833	0.313667	0.291167	0.272	0.26	0.231	0.2115	0.188	0.153	0.133833	0.0951667	0.066		1	1	1	1	1	1	1	1	1	1	1	1			0.417833	0.313667	0.291167	0.272	0.26	0.231	0.2115	0.188	0.153	0.133833	0.0951667	0.066			174	174	174	174	174	174	174	174
258	0.417833	0.316667	0.291167	0.275	0.256	0.232	0.2125	0.192	0.154	0.133833	0.0971667	0.067		1	1	1	1	1	1	1	1	1	1	1	1			0.417833	0.316667	0.291167	0.275	0.256	0.232	0.2125	0.192	0.154	0.133833	0.0971667	0.067			175	175	175	175	175	175	175	175
259.5	0.422833	0.316667	0.290167	0.272	0.256	0.231	0.2115	0.19	0.153	0.131833	0.0971667	0.069		1	1	1	1	1	1	1	1	1	1	1	1			0.422833	0.316667	0.290167	0.272	0.256	0.231	0.2115	0.19	0.153	0.131833	0.0971667	0.069			176	176	176	176	176	176	176	176
261	0.419833	0.319667	0.291167	0.279	0.26	0.234	0.2155	0.196	0.157	0.134833	0.0981667	0.07		1	1	1	1	1	1	1	1	1	1	1	1			0.419833	0.319667	0.291167	0.279	0.26	0.234	0.2155	0.196	0.157	0.134833	0.0981667	0.07			177	177	177	177	177	177	177	177
262.5	0.423833	0.319667	0.294167	0.285	0.263	0.235	0.2165	0.198	0.158	0.138833	0.101167	0.071		1	1	1	1	1	1	1	1	1	1	1	1			0.423833	0.319667	0.294167	0.285	0.263	0.235	0.2165	0.198	0.158	0.138833	0.101167	0.071			178	178	178	178	178	178	178	178
264	0.427833	0.318667	0.296167	0.288	0.261	0.235	0.2155	0.2	0.161	0.139833	0.102167	0.072		1	1	1	1	1	1	1	1	1	1	1	1			0.427833	0.318667	0.296167	0.288	0.261	0.235	0.2155	0.2	0.161	0.139833	0.102167	0.072			179	179	179	179	179	179	179	179
265.5	0.427833	0.324667	0.296167	0.286	0.262	0.238	0.2185	0.203	0.163	0.138833	0.104167	0.074		1	1	1	1	1	1	1	1	1	1	1	1			0.427833	0.324667	0.296167	0.286	0.262	0.238	0.2185	0.203	0.163	0.138833	0.104167	0.074			180	180	180	180	180	180	180	180
267	0.430833	0.329667	0.298167	0.284	0.262	0.242	0.2205	0.204	0.166	0.139833	0.105167	0.076		1	1	1	1	1	1	1	1	1	1	1	1			0.430833	0.329667	0.298167	0.284	0.262	0.242	0.2205	0.204	0.166	0.139833	0.105167	0.076			181	181	181	181	181	181	181	181
268.5	0.428833	0.332667	0.298167	0.281	0.264	0.24	0.2195	0.203	0.168	0.140833	0.106167	0.075		1	1	1	1	1	1	1	1	1	1	1	1			0.428833	0.332667	0.298167	0.281	0.264	0.24	0.2195	0.203	0.168	0.140833	0.106167	0.075			182	182	182	182	182	182	182	182
270	0.430833	0.330667	0.300167	0.285	0.265	0.241	0.2205	0.203	0.167	0.144833	0.107167	0.077		1	1	1	1	1	1	1	1	1	1	1	1			0.430833	0.330667	0.300167	0.285	0.265	0.241	0.2205	0.203	0.167	0.144833	0.107167	0.077			183	183	183	183	183	183	183	183
[truncated: 54 more columns]

## Sheet: W42Q_glycerol_1
	PIPES 10 mM pH 6.7 NaCl 150 mM glycerol, X mM													PIPES 10 mM pH 6.7 NaCl 150 mM glycerol, X mM														PIPES 10 mM pH 6.7 NaCl 150 mM glycerol, X mM														PIPES 10 mM pH 6.7 NaCl 150 mM glycerol, X mM
	0	50	75	100	125	150	175	200	225	250	300	355		0	50	75	100	125	150	175	200	225	250	300	355			0	50	75	100	125	150	175	200	225	250	300	355			0	50	75	100	125	150	175	200
0	0.00183333	0.00266667	0.00333333	0.000833333	0.00116667	0.000333333	0.00216667	0.00216667	0.00266667	0.0015	0.0005	0.00133333		0	0	0	0	0	0	0	0	0	0	0	0			0	0	0	0	0	0	0	0	0	0	0	0			0	0	0	0	0	0	0	0
1.5	-0.00116667	0.000666667	0.000333333	-0.000166667	0.000166667	-0.00166667	-0.000833333	-0.000833333	-0.000333333	-0.0005	0.0005	-0.00166667		0	0	0	0	0	0	0	0	0	0	0	0			0	0	0	0	0	0	0	0	0	0	0	0			0	0	0	0	0	0	0	0
3	0.00183333	0.000666667	0.00133333	-0.000166667	0.000166667	0.000333333	0.00116667	0.00116667	0.00166667	0.0005	-0.0005	0.000333333		0	0	0	0	0	0	0	0	0	0	0	0			0	0	0	0	0	0	0	0	0	0	0	0			0	0	0	0	0	0	0	0
4.5	-0.00116667	-0.000333333	-0.000666667	-0.00116667	-0.00183333	-0.00166667	-0.000833333	0.000166667	0.000666667	-0.0015	-0.0005	-0.00166667		0	0	0	0	0	0	0	0	0	0	0	0			0	0	0	0	0	0	0	0	0	0	0	0			0	0	0	0	0	0	0	0
6	-0.000166667	0.00166667	0.00233333	0.00183333	0.00116667	0.000333333	0.000166667	0.00116667	0.000666667	0.0015	0.0005	0.00133333		0	0	0	0	0	0	0	0	0	0	0	0			0	0	0	0	0	0	0	0	0	0	0	0			0	0	0	0	0	0	0	0
7.5	-0.000166667	0.000666667	0.000333333	-0.000166667	0.00116667	-0.000666667	0.000166667	0.000166667	0.000666667	0.0005	-0.0005	0.000333333		0	0	0	0	0	0	0	0	0	0	0	0			0	0	0	0	0	0	0	0	0	0	0	0			0	0	0	0	0	0	0	0
9	0.000833333	-0.000333333	0.000333333	0.000833333	-0.000833333	0.000333333	0.000166667	0.00116667	0.00166667	0.0005	0.0005	0.000333333		0	0	0	0	0	0	0	0	0	0	0	0			0	0	0	0	0	0	0	0	0	0	0	0			0	0	0	0	0	0	0	0
10.5	-0.00216667	-0.00133333	-0.000666667	-0.00116667	-0.000833333	-0.000666667	-0.000833333	-0.000833333	-0.00133333	-0.0005	-0.0005	-0.000666667		0	0	0	0	0	0	0	0	0	0	0	0			0	0	0	0	0	0	0	0	0	0	0	0			0	0	0	0	0	0	0	0
12	-0.000166667	-0.000333333	0.000333333	-0.000166667	0.000166667	0.000333333	0.00116667	0.000166667	-0.000333333	0.0005	-0.0005	-0.000666667		0	0	0	0	0	0	0	0	0	0	0	0			0	0	0	0	0	0	0	0	0	0	0	0			0	0	0	0	0	0	0	0
13.5	0.000833333	0.000666667	-0.000666667	-0.000166667	0.000166667	0.000333333	0.000166667	-0.000833333	-0.000333333	-0.0015	-0.0005	0.000333333		0	0	0	0	0	0	0	0	0	0	0	0			0	0	0	0	0	0	0	0	0	0	0	0			0	0	0	0	0	0	0	0
15	0.000833333	0.000666667	0.000333333	0.000833333	0.000166667	0.000333333	-0.000833333	0.000166667	-0.000333333	0.0005	0.0015	0.000333333		0	0	0	0	0	0	0	0	0	0	0	0			0	0	0	0	0	0	0	0	0	0	0	0			0	0	0	0	0	0	0	0
16.5	0.000833333	0.00166667	0.00133333	-0.000166667	0.000166667	-0.000666667	0.000166667	0.000166667	0.000666667	0.0005	-0.0005	0.000333333		0	0	0	0	0	0	0	0	0	0	0	0			0	0	0	0	0	0	0	0	0	0	0	0			0	0	0	0	0	0	0	0
18	0.000833333	0.000666667	0.00133333	-0.000166667	0.000166667	0.000333333	0.00116667	0.00116667	0.00166667	0.0015	0.0005	0.000333333		0	0	0	0	0	0	0	0	0	0	0	0			0	0	0	0	0	0	0	0	0	0	0	0			0	0	0	0	0	0	0	0
19.5	-0.00116667	-0.00133333	-0.000666667	-0.00116667	0.000166667	-0.00166667	-0.00183333	-0.000833333	-0.00133333	-0.0005	-0.0015	-0.00266667		0	0	0	0	0	0	0	0	0	0	0	0			0	0	0	0	0	0	0	0	0	0	0	0			0	0	0	0	0	0	0	0
21	-0.00216667	-0.000333333	0.000333333	-0.000166667	-0.00183333	-0.00166667	-0.000833333	-0.00183333	-0.00133333	-0.0015	-0.0015	-0.00166667		0	0	0	0	0	0	0	0	0	0	0	0			0	0	0	0	0	0	0	0	0	0	0	0			0	0	0	0	0	0	0	0
22.5	0.000833333	-0.000333333	0.00133333	-0.000166667	0.000166667	-0.000666667	-0.000833333	0.000166667	-0.000333333	0.0005	0.0005	-0.000666667		0	0	0	0	0	0	0	0	0	0	0	0			0	0	0	0	0	0	0	0	0	0	0	0			0	0	0	0	0	0	0	0
24	-0.00216667	-0.00133333	-0.000666667	-0.00116667	0.000166667	-0.00166667	-0.000833333	0.000166667	-0.000333333	-0.0005	-0.0015	-0.00166667		0	0	0	0	0	0	0	0	0	0	0	0			0	0	0	0	0	0	0	0	0	0	0	0			0	0	0	0	0	0	0	0
25.5	-0.00116667	-0.00133333	-0.000666667	-0.000166667	-0.00183333	-0.000666667	-0.000833333	-0.000833333	-0.000333333	-0.0005	-0.0005	-0.00166667		0	0	0	0	0	0	0	0	0	0	0	0			0	0	0	0	0	0	0	0	0	0	0	0			0	0	0	0	0	0	0	0
27	0.000833333	0.000666667	0.00133333	-0.000166667	0.00116667	-0.000666667	0.00116667	0.00116667	0.00166667	0.0015	0.0005	0.000333333		0	0	0	0	0	0	0	0	0	0	0	0			0	0	0	0	0	0	0	0	0	0	0	0			0	0	0	0	0	0	0	0
28.5	-0.00216667	-0.00133333	-0.000666667	-0.000166667	-0.00183333	-0.00166667	-0.00183333	0.000166667	-0.000333333	-0.0005	-0.0025	0.000333333		0	0	0	0	0	0	0	0	0	0	0	0			0	0	0	0	0	0	0	0	0	0	0	0			0	0	0	0	0	0	0	0
30	-0.000166667	0.00166667	0.00133333	0.000833333	0.00116667	-0.000666667	0.00116667	0.00516667	-0.000333333	0.0025	0.0005	-0.000666667		0	0	0	0	0	0	0	0	0	0	0	0			0	0	0	0	0	0	0	0	0	0	0	0			0	0	0	0	0	0	0	0
31.5	-0.00116667	-0.00133333	0.000333333	-0.00116667	-0.00183333	-0.00166667	-0.000833333	0.00516667	0.000666667	0.0005	-0.0005	0.000333333		0	0	0	0	0	0	0	0	0	0	0	0			0	0	0	0	0	0	0	0	0	0	0	0			0	0	0	0	0	0	0	0
33	-0.00116667	-0.00233333	-0.00166667	-0.00116667	0.000166667	-0.000666667	-0.00183333	0.000166667	0.000666667	0.0005	-0.0025	-0.00166667		0	0	0	0	0	0	0	0	0	0	0	0			0	0	0	0	0	0	0	0	0	0	0	0			0	0	0	0	0	0	0	0
34.5	0.000833333	0.000666667	0.00133333	0.000833333	0.000166667	0.000333333	0.000166667	0.00116667	0.000666667	0.0015	0.0005	0.000333333		0	0	0	0	0	0	0	0	0	0	0	0			0	0	0	0	0	0	0	0	0	0	0	0			0	0	0	0	0	0	0	0
36	0.000833333	-0.000333333	0.000333333	-0.00116667	-0.000833333	0.00133333	-0.000833333	0.000166667	0.000666667	0.0005	-0.0015	-0.000666667		0	0	0	0	0	0	0	0	0	0	0	0			0	0	0	0	0	0	0	0	0	0	0	0			0	0	0	0	0	0	0	0
37.5	-0.000166667	-0.000333333	0.00133333	-0.00116667	0.000166667	0.000333333	0.000166667	-0.000833333	-0.000333333	0.0015	0.0005	0.000333333		0	0	0	0	0	0	0	0	0	0	0	0			0	0	0	0	0	0	0	0	0	0	0	0			0	0	0	0	0	0	0	0
39	0.000833333	0.00166667	0.00233333	0.00183333	0.00116667	0.000333333	0.00216667	0.00216667	0.000666667	0.0015	0.0005	0.00133333		0	0	0	0	0	0	0	0	0	0	0	0			0	0	0	0	0	0	0	0	0	0	0	0			0	0	0	0	0	0	0	0
40.5	-0.00116667	-0.000333333	-0.000666667	-0.000166667	-0.000833333	-0.00166667	0.000166667	0.000166667	-0.000333333	0.0005	-0.0005	-0.00166667		0	0	0	0	0	0	0	0	0	0	0	0			0	0	0	0	0	0	0	0	0	0	0	0			0	0	0	0	0	0	0	0
42	-0.000166667	-0.000333333	-0.000666667	-0.00116667	-0.00183333	0.000333333	0.000166667	-0.000833333	0.00166667	0.0005	-0.0015	-0.000666667		0	0	0	0	0	0	0	0	0	0	0	0			0	0	0	0	0	0	0	0	0	0	0	0			0	0	0	0	0	0	0	0
43.5	-0.000166667	-0.00133333	0.000333333	-0.000166667	0.000166667	0.000333333	0.000166667	0.000166667	0.000666667	0.0015	-0.0005	-0.000666667		0	0	0	0	0	0	0	0	0	0	0	0			0	0	0	0	0	0	0	0	0	0	0	0			0	0	0	0	0	0	0	0
45	-0.00116667	0.000666667	0.00133333	0.00183333	0.00116667	0.000333333	0.000166667	0.00116667	0.000666667	0.0025	-0.0005	-0.000666667		0	0	0	0	0	0	0	0	0	0	0	0			0	0	0	0	0	0	0	0	0	0	0	0			0	0	0	0	0	0	0	0
46.5	-0.000166667	0.00166667	0.000333333	-0.000166667	0.00116667	-0.000666667	0.00116667	0.00216667	0.000666667	0.0025	0.0015	0.000333333		0	0	0	0	0	0	0	0	0	0	0	0			0	0	0	0	0	0	0	0	0	0	0	0			0	0	0	0	0	0	0	0
48	-0.00116667	-0.000333333	0.000333333	-0.000166667	0.00116667	0.000333333	0.000166667	-0.000833333	0.000666667	0.0015	-0.0005	0.000333333		0	0	0	0	0	0	0	0	0	0	0	0			0	0	0	0	0	0	0	0	0	0	0	0			0	0	0	0	0	0	0	0
49.5	0.000833333	0.00166667	0.00133333	0.000833333	0.00116667	0.000333333	0.000166667	0.00216667	0.00166667	0.0015	0.0005	-0.000666667		0	0	0	0	0	0	0	0	0	0	0	0			0	0	0	0	0	0	0	0	0	0	0	0			0	0	0	0	0	0	0	0
51	-0.00216667	0.000666667	-0.000666667	-0.00216667	-0.00183333	-0.000666667	-0.000833333	0.000166667	-0.000333333	-0.0005	-0.0005	-0.00166667		0	0	0	0	0	0	0	0	0	0	0	0			0	0	0	0	0	0	0	0	0	0	0	0			0	0	0	0	0	0	0	0
52.5	-0.000166667	0.00166667	0.00133333	0.000833333	-0.000833333	0.000333333	0.00116667	0.00216667	0.000666667	0.0015	-0.0005	-0.000666667		0	0	0	0	0	0	0	0	0	0	0	0			0	0	0	0	0	0	0	0	0	0	0	0			0	0	0	0	0	0	0	0
54	0.000833333	0.000666667	0.000333333	-0.000166667	-0.000833333	-0.00166667	0.00116667	0.00316667	0.000666667	0.0025	-0.0015	0.000333333		0	0	0	0	0	0	0	0	0	0	0	0			0	0	0	0	0	0	0	0	0	0	0	0			0	0	0	0	0	0	0	0
55.5	-0.00116667	-0.00133333	-0.000666667	-0.00216667	-0.00183333	-0.000666667	-0.00183333	0.00216667	-0.00133333	0.0005	-0.0005	-0.00166667		0	0	0	0	0	0	0	0	0	0	0	0			0	0	0	0	0	0	0	0	0	0	0	0			0	0	0	0	0	0	0	0
57	0.000833333	0.00266667	0.000333333	0.000833333	-0.000833333	0.000333333	0.000166667	0.00116667	0.00266667	0.0035	-0.0005	0.00133333		0	0	0	0	0	0	0	0	0	0	0	0			0	0	0	0	0	0	0	0	0	0	0	0			0	0	0	0	0	0	0	0
58.5	0.000833333	0.00166667	0.00133333	0.000833333	0.00116667	0.00133333	0.00116667	0.00316667	0.00266667	0.0045	0.0025	0.00133333		0	0	0	0	0	0	0	0	0	0	0	0			0	0	0	0	0	0	0	0	0	0	0	0			0	0	0	0	0	0	0	0
60	0.000833333	0.000666667	0.00133333	-0.000166667	0.000166667	0.000333333	0.00116667	0.000166667	0.000666667	0.0015	0.0005	0.000333333		0	0	0	0	0	0	0	0	0	0	0	0			0	0	0	0	0	0	0	0	0	0	0	0			0	0	0	0	0	0	0	0
61.5	-0.000166667	0.000666667	0.00133333	-0.000166667	0.00116667	0.00133333	0.00216667	-0.000833333	0.00166667	0.0015	0.0005	0.00133333		0	0	0	0	0	0	0	0	0	0	0	0			0	0	0	0	0	0	0	0	0	0	0	0			0	0	0	0	0	0	0	0
63	-0.000166667	0.000666667	0.000333333	-0.000166667	0.000166667	-0.000666667	0.000166667	0.000166667	0.000666667	0.0005	-0.0015	0.000333333		0	0	0	0	0	0	0	0	0	0	0	0			0	0	0	0	0	0	0	0	0	0	0	0			0	0	0	0	0	0	0	0
64.5	-0.000166667	0.000666667	0.00133333	0.000833333	0.000166667	0.000333333	0.000166667	0.00116667	0.000666667	0.0025	0.0005	0.000333333		0	0	0	0	0	0	0	0	0	0	0	0			0	0	0	0	0	0	0	0	0	0	0	0			0	0	0	0	0	0	0	0
66	0.000833333	-0.000333333	0.000333333	-0.000166667	-0.000833333	-0.000666667	-0.000833333	0.000166667	-0.00133333	0.0005	-0.0005	-0.00266667		0	0	0	0	0	0	0	0	0	0	0	0			0	0	0	0	0	0	0	0	0	0	0	0			0	0	0	0	0	0	0	0
67.5	-0.00116667	-0.00233333	0.000333333	-0.00116667	-0.000833333	0.000333333	0.000166667	-0.000833333	0.000666667	0.0015	-0.0005	-0.000666667		0	0	0	0	0	0	0	0	0	0	0	0			0	0	0	0	0	0	0	0	0	0	0	0			0	0	0	0	0	0	0	0
69	0.000833333	0.000666667	0.00133333	0.000833333	0.000166667	0.00133333	0.000166667	0.000166667	0.000666667	0.0025	-0.0005	0.000333333		0	0	0	0	0	0	0	0	0	0	0	0			0	0	0	0	0	0	0	0	0	0	0	0			0	0	0	0	0	0	0	0
70.5	-0.00216667	-0.00233333	-0.000666667	-0.000166667	-0.000833333	-0.00166667	-0.000833333	-0.00183333	-0.000333333	0.0005	-0.0005	-0.00266667		0	0	0	0	0	0	0	0	0	0	0	0			0	0	0	0	0	0	0	0	0	0	0	0			0	0	0	0	0	0	0	0
72	-0.00116667	0.000666667	0.00133333	-0.00116667	-0.00183333	-0.000666667	0.000166667	0.000166667	0.000666667	0.0005	0.0005	0.000333333		0	0	0	0	0	0	0	0	0	0	0	0			0	0	0	0	0	0	0	0	0	0	0	0			0	0	0	0	0	0	0	0
73.5	0.00183333	0.00166667	0.000333333	0.00183333	0.000166667	0.000333333	0.00216667	0.00116667	0.000666667	0.0025	0.0005	0.00133333		0	0	0	0	0	0	0	0	0	0	0	0			0	0	0	0	0	0	0	0	0	0	0	0			0	0	0	0	0	0	0	0
75	0.000833333	0.000666667	0.00133333	-0.000166667	-0.000833333	-0.000666667	0.000166667	0.000166667	0.000666667	0.0015	-0.0005	0.000333333		0	0	0	0	0	0	0	0	0	0	0	0			0	0	0	0	0	0	0	0	0	0	0	0			0	0	0	0	0	0	0	0
76.5	0.00283333	0.000666667	0.000333333	0.000833333	0.000166667	0.00133333	0.00116667	0.00116667	0.000666667	0.0015	-0.0005	-0.000666667		0	0	0	0	0	0	0	0	0	0	0	0			0	0	0	0	0	0	0	0	0	0	0	0			0	0	0	0	0	0	0	0
78	0.00283333	0.00166667	0.00133333	0.00183333	0.000166667	0.000333333	0.00116667	0.00216667	0.000666667	0.0025	-0.0005	-0.000666667		0	0	0	0	0	0	0	0	0	0	0	0			0	0	0	0	0	0	0	0	0	0	0	0			0	0	0	0	0	0	0	0
79.5	0.00483333	0.00166667	0.00133333	0.00183333	0.00216667	0.00133333	0.00116667	0.00316667	0.000666667	0.0025	0.0005	0.000333333		0	0	0	0	0	0	0	0	0	0	0	0			0	0	0	0	0	0	0	0	0	0	0	0			0	0	0	0	0	0	0	0
81	0.00483333	0.00266667	0.00233333	0.00383333	0.00216667	0.000333333	0.00216667	0.000166667	0.000666667	0.0025	-0.0005	-0.00166667		0	0	0	0	0	0	0	0	0	0	0	0			0	0	0	0	0	0	0	0	0	0	0	0			0	0	0	0	0	0	0	0
82.5	0.00783333	0.00266667	0.00233333	0.00483333	0.00216667	0.00133333	0.00216667	0.000166667	0.000666667	0.0045	-0.0005	-0.000666667		0	0	0	0	0	0	0	0	0	0	0	0			0	0	0	0	0	0	0	0	0	0	0	0			0	0	0	0	0	0	0	0
84	0.0128333	0.00366667	0.00633333	0.00683333	0.00416667	0.00433333	0.00416667	0.00216667	0.00166667	0.0045	0.0015	0.000333333		0	0	0	0	0	0	0	0	0	0	0	0			0	0	0	0	0	0	0	0	0	0	0	0			0	0	0	0	0	0	0	0
85.5	0.0148333	0.00766667	0.00633333	0.00883333	0.00616667	0.00533333	0.00416667	0.00216667	0.00266667	0.0065	0.0005	-0.000666667		0	0	0	0	0	0	0	0	0	0	0	0			0	0	0	0	0	0	0	0	0	0	0	0			0	0	0	0	0	0	0	0
87	0.0188333	0.00766667	0.00733333	0.00983333	0.00816667	0.00733333	0.00516667	0.00316667	0.00266667	0.0085	-0.0005	0.00133333		0	0	0	0	0	0	0	0	0	0	0	0			0	0	0	0	0	0	0	0	0	0	0	0			0	0	0	0	0	0	0	0
88.5	0.0208333	0.0106667	0.0103333	0.0138333	0.0101667	0.00733333	0.00716667	0.00516667	0.00266667	0.0095	0.0005	-0.000666667		0	0	0	0	0	0	0	0	0	0	0	0			0	0	0	0	0	0	0	0	0	0	0	0			0	0	0	0	0	0	0	0
90	0.0258333	0.0136667	0.0123333	0.0168333	0.0141667	0.0113333	0.00916667	0.00716667	0.00466667	0.0115	0.0015	0.00133333		0	0	0	0	0	0	0	0	0	0	0	0			0	0	0	0	0	0	0	0	0	0	0	0			0	0	0	0	0	0	0	0
91.5	0.0308333	0.0166667	0.0153333	0.0228333	0.0181667	0.0153333	0.0121667	0.00716667	0.00666667	0.0145	0.0025	0.00233333		0	0	0	0	0	0	0	0	0	0	0	0			0	0	0	0	0	0	0	0	0	0	0	0			0	0	0	0	0	0	0	0
93	0.0358333	0.0206667	0.0183333	0.0248333	0.0201667	0.0183333	0.0151667	0.0111667	0.00866667	0.0185	0.0055	0.00333333		0	0	0	0	0	0	0	0	0	0	0	0			0	0	0	0	0	0	0	0	0	0	0	0			0	0	0	0	0	0	0	0
94.5	0.0398333	0.0236667	0.0213333	0.0268333	0.0241667	0.0193333	0.0171667	0.0121667	0.00966667	0.0215	0.0065	0.00433333		0	0	0	0	0	0	0	0	0	0	0	0			0	0	0	0	0	0	0	0	0	0	0	0			0	0	0	0	0	0	0	0
96	0.0448333	0.0276667	0.0273333	0.0308333	0.0291667	0.0253333	0.0211667	0.0151667	0.0126667	0.0245	0.0075	0.00433333		0	0	0	0	0	0	0	0	0	0	0	0			0	0	0	0	0	0	0	0	0	0	0	0			0	0	0	0	0	0	0	0
97.5	0.0498333	0.0306667	0.0303333	0.0358333	0.0321667	0.0303333	0.0231667	0.0191667	0.0146667	0.0295	0.0105	0.00633333		1	0	0	0	0	0	0	0	0	0	0	0			0.0498333	0	0	0	0	0	0	0	0	0	0	0			68	0	0	0	0	0	0	0
99	0.0568333	0.0336667	0.0323333	0.0418333	0.0371667	0.0343333	0.0281667	0.0251667	0.0176667	0.0325	0.0125	0.00833333		1	0	0	0	0	0	0	0	0	0	0	0			0.0568333	0	0	0	0	0	0	0	0	0	0	0			69	0	0	0	0	0	0	0
100.5	0.0628333	0.0406667	0.0373333	0.0488333	0.0421667	0.0403333	0.0321667	0.0301667	0.0206667	0.0375	0.0155	0.0103333		1	0	0	1	0	0	0	0	0	0	0	0			0.0628333	0	0	0.0488333	0	0	0	0	0	0	0	0			70	0	0	70	0	0	0	0
102	0.0678333	0.0466667	0.0463333	0.0548333	0.0451667	0.0433333	0.0361667	0.0311667	0.0256667	0.0415	0.0195	0.0143333		1	1	1	1	1	0	0	0	0	0	0	0			0.0678333	0.0466667	0.0463333	0.0548333	0.0451667	0	0	0	0	0	0	0			71	71	71	71	71	0	0	0
103.5	0.0728333	0.0486667	0.0503333	0.0618333	0.0531667	0.0503333	0.0401667	0.0361667	0.0306667	0.0485	0.0235	0.0153333		1	1	1	1	1	1	0	0	0	1	0	0			0.0728333	0.0486667	0.0503333	0.0618333	0.0531667	0.0503333	0	0	0	0.0485	0	0			72	72	72	72	72	72	0	0
105	0.0778333	0.0566667	0.0533333	0.0688333	0.0571667	0.0543333	0.0461667	0.0381667	0.0326667	0.0545	0.0265	0.0183333		1	1	1	1	1	1	1	0	0	1	0	0			0.0778333	0.0566667	0.0533333	0.0688333	0.0571667	0.0543333	0.0461667	0	0	0.0545	0	0			73	73	73	73	73	73	73	0
106.5	0.0828333	0.0596667	0.0563333	0.0718333	0.0641667	0.0573333	0.0511667	0.0431667	0.0386667	0.0585	0.0295	0.0223333		1	1	1	1	1	1	1	0	0	1	0	0			0.0828333	0.0596667	0.0563333	0.0718333	0.0641667	0.0573333	0.0511667	0	0	0.0585	0	0			74	74	74	74	74	74	74	0
108	0.0888333	0.0666667	0.0673333	0.0788333	0.0681667	0.0613333	0.0541667	0.0471667	0.0406667	0.0655	0.0335	0.0253333		1	1	1	1	1	1	1	1	0	1	0	0			0.0888333	0.0666667	0.0673333	0.0788333	0.0681667	0.0613333	0.0541667	0.0471667	0	0.0655	0	0			75	75	75	75	75	75	75	75
109.5	0.0958333	0.0716667	0.0703333	0.0848333	0.0721667	0.0703333	0.0591667	0.0511667	0.0456667	0.0695	0.0375	0.0283333		1	1	1	1	1	1	1	1	1	1	0	0			0.0958333	0.0716667	0.0703333	0.0848333	0.0721667	0.0703333	0.0591667	0.0511667	0.0456667	0.0695	0	0			76	76	76	76	76	76	76	76
111	0.102833	0.0776667	0.0723333	0.0888333	0.0771667	0.0713333	0.0641667	0.0581667	0.0526667	0.0745	0.0415	0.0313333		1	1	1	1	1	1	1	1	1	1	0	0			0.102833	0.0776667	0.0723333	0.0888333	0.0771667	0.0713333	0.0641667	0.0581667	0.0526667	0.0745	0	0			77	77	77	77	77	77	77	77
112.5	0.108833	0.0806667	0.0793333	0.0938333	0.0831667	0.0743333	0.0681667	0.0631667	0.0576667	0.0825	0.0465	0.0373333		1	1	1	1	1	1	1	1	1	1	1	0			0.108833	0.0806667	0.0793333	0.0938333	0.0831667	0.0743333	0.0681667	0.0631667	0.0576667	0.0825	0.0465	0			78	78	78	78	78	78	78	78
114	0.116833	0.0876667	0.0873333	0.100833	0.0891667	0.0813333	0.0781667	0.0701667	0.0616667	0.0885	0.0505	0.0423333		1	1	1	1	1	1	1	1	1	1	1	0			0.116833	0.0876667	0.0873333	0.100833	0.0891667	0.0813333	0.0781667	0.0701667	0.0616667	0.0885	0.0505	0			79	79	79	79	79	79	79	79
115.5	0.115833	0.0906667	0.0923333	0.104833	0.0891667	0.0893333	0.0781667	0.0691667	0.0666667	0.0935	0.0535	0.0443333		1	1	1	1	1	1	1	1	1	1	1	0			0.115833	0.0906667	0.0923333	0.104833	0.0891667	0.0893333	0.0781667	0.0691667	0.0666667	0.0935	0.0535	0			80	80	80	80	80	80	80	80
117	0.117833	0.100667	0.0953333	0.116833	0.100167	0.0973333	0.0851667	0.0791667	0.0736667	0.1025	0.0615	0.0503333		1	1	1	1	1	1	1	1	1	1	1	1			0.117833	0.100667	0.0953333	0.116833	0.100167	0.0973333	0.0851667	0.0791667	0.0736667	0.1025	0.0615	0.0503333			81	81	81	81	81	81	81	81
118.5	0.126833	0.104667	0.0973333	0.121833	0.102167	0.0983333	0.0941667	0.0851667	0.0766667	0.1065	0.0655	0.0533333		1	1	1	1	1	1	1	1	1	1	1	1			0.126833	0.104667	0.0973333	0.121833	0.102167	0.0983333	0.0941667	0.0851667	0.0766667	0.1065	0.0655	0.0533333			82	82	82	82	82	82	82	82
120	0.138833	0.109667	0.103333	0.126833	0.109167	0.101333	0.0971667	0.0951667	0.0816667	0.1115	0.0685	0.0583333		1	1	1	1	1	1	1	1	1	1	1	1			0.138833	0.109667	0.103333	0.126833	0.109167	0.101333	0.0971667	0.0951667	0.0816667	0.1115	0.0685	0.0583333			83	83	83	83	83	83	83	83
121.5	0.140833	0.115667	0.111333	0.134833	0.112167	0.106333	0.102167	0.100167	0.0876667	0.1175	0.0755	0.0643333		1	1	1	1	1	1	1	1	1	1	1	1			0.140833	0.115667	0.111333	0.134833	0.112167	0.106333	0.102167	0.100167	0.0876667	0.1175	0.0755	0.0643333			84	84	84	84	84	84	84	84
123	0.144833	0.121667	0.120333	0.129833	0.122167	0.116333	0.109167	0.102167	0.0936667	0.1245	0.0815	0.0703333		1	1	1	1	1	1	1	1	1	1	1	1			0.144833	0.121667	0.120333	0.129833	0.122167	0.116333	0.109167	0.102167	0.0936667	0.1245	0.0815	0.0703333			85	85	85	85	85	85	85	85
124.5	0.151833	0.126667	0.123333	0.136833	0.130167	0.120333	0.114167	0.104167	0.0976667	0.1295	0.0835	0.0723333		1	1	1	1	1	1	1	1	1	1	1	1			0.151833	0.126667	0.123333	0.136833	0.130167	0.120333	0.114167	0.104167	0.0976667	0.1295	0.0835	0.0723333			86	86	86	86	86	86	86	86
126	0.158833	0.131667	0.125333	0.143833	0.128167	0.128333	0.115167	0.107167	0.0996667	0.1345	0.0875	0.0763333		1	1	1	1	1	1	1	1	1	1	1	1			0.158833	0.131667	0.125333	0.143833	0.128167	0.128333	0.115167	0.107167	0.0996667	0.1345	0.0875	0.0763333			87	87	87	87	87	87	87	87
127.5	0.164833	0.137667	0.129333	0.144833	0.136167	0.132333	0.124167	0.117167	0.108667	0.1425	0.0915	0.0823333		1	1	1	1	1	1	1	1	1	1	1	1			0.164833	0.137667	0.129333	0.144833	0.136167	0.132333	0.124167	0.117167	0.108667	0.1425	0.0915	0.0823333			88	88	88	88	88	88	88	88
129	0.166833	0.141667	0.138333	0.147833	0.145167	0.133333	0.131167	0.118167	0.114667	0.1455	0.0955	0.0863333		1	1	1	1	1	1	1	1	1	1	1	1			0.166833	0.141667	0.138333	0.147833	0.145167	0.133333	0.131167	0.118167	0.114667	0.1455	0.0955	0.0863333			89	89	89	89	89	89	89	89
130.5	0.167833	0.146667	0.146333	0.155833	0.146167	0.139333	0.134167	0.125167	0.117667	0.1505	0.1015	0.0913333		1	1	1	1	1	1	1	1	1	1	1	1			0.167833	0.146667	0.146333	0.155833	0.146167	0.139333	0.134167	0.125167	0.117667	0.1505	0.1015	0.0913333			90	90	90	90	90	90	90	90
132	0.178833	0.153667	0.151333	0.159833	0.150167	0.145333	0.139167	0.136167	0.119667	0.1555	0.1085	0.0953333		1	1	1	1	1	1	1	1	1	1	1	1			0.178833	0.153667	0.151333	0.159833	0.150167	0.145333	0.139167	0.136167	0.119667	0.1555	0.1085	0.0953333			91	91	91	91	91	91	91	91
133.5	0.183833	0.157667	0.155333	0.167833	0.160167	0.150333	0.147167	0.139167	0.126667	0.1625	0.1105	0.0993333		1	1	1	1	1	1	1	1	1	1	1	1			0.183833	0.157667	0.155333	0.167833	0.160167	0.150333	0.147167	0.139167	0.126667	0.1625	0.1105	0.0993333			92	92	92	92	92	92	92	92
135	0.183833	0.158667	0.159333	0.174833	0.161167	0.155333	0.145167	0.136167	0.132667	0.1665	0.1145	0.100333		1	1	1	1	1	1	1	1	1	1	1	1			0.183833	0.158667	0.159333	0.174833	0.161167	0.155333	0.145167	0.136167	0.132667	0.1665	0.1145	0.100333			93	93	93	93	93	93	93	93
136.5	0.185833	0.166667	0.158333	0.174833	0.167167	0.158333	0.150167	0.143167	0.134667	0.1695	0.1165	0.107333		1	1	1	1	1	1	1	1	1	1	1	1			0.185833	0.166667	0.158333	0.174833	0.167167	0.158333	0.150167	0.143167	0.134667	0.1695	0.1165	0.107333			94	94	94	94	94	94	94	94
138	0.190833	0.172667	0.165333	0.180833	0.168167	0.163333	0.162167	0.150167	0.138667	0.1735	0.1205	0.112333		1	1	1	1	1	1	1	1	1	1	1	1			0.190833	0.172667	0.165333	0.180833	0.168167	0.163333	0.162167	0.150167	0.138667	0.1735	0.1205	0.112333			95	95	95	95	95	95	95	95
139.5	0.191833	0.173667	0.169333	0.185833	0.167167	0.170333	0.156167	0.150167	0.147667	0.1775	0.1255	0.114333		1	1	1	1	1	1	1	1	1	1	1	1			0.191833	0.173667	0.169333	0.185833	0.167167	0.170333	0.156167	0.150167	0.147667	0.1775	0.1255	0.114333			96	96	96	96	96	96	96	96
141	0.196833	0.174667	0.172333	0.188833	0.176167	0.177333	0.166167	0.155167	0.150667	0.1875	0.1305	0.121333		1	1	1	1	1	1	1	1	1	1	1	1			0.196833	0.174667	0.172333	0.188833	0.176167	0.177333	0.166167	0.155167	0.150667	0.1875	0.1305	0.121333			97	97	97	97	97	97	97	97
142.5	0.204833	0.183667	0.173333	0.190833	0.186167	0.178333	0.176167	0.160167	0.152667	0.1915	0.1375	0.122333		1	1	1	1	1	1	1	1	1	1	1	1			0.204833	0.183667	0.173333	0.190833	0.186167	0.178333	0.176167	0.160167	0.152667	0.1915	0.1375	0.122333			98	98	98	98	98	98	98	98
144	0.206833	0.182667	0.177333	0.198833	0.186167	0.181333	0.181167	0.163167	0.158667	0.1915	0.1435	0.124333		1	1	1	1	1	1	1	1	1	1	1	1			0.206833	0.182667	0.177333	0.198833	0.186167	0.181333	0.181167	0.163167	0.158667	0.1915	0.1435	0.124333			99	99	99	99	99	99	99	99
145.5	0.207833	0.182667	0.182333	0.202833	0.184167	0.181333	0.173167	0.164167	0.161667	0.1975	0.1495	0.131333		1	1	1	1	1	1	1	1	1	1	1	1			0.207833	0.182667	0.182333	0.202833	0.184167	0.181333	0.173167	0.164167	0.161667	0.1975	0.1495	0.131333			100	100	100	100	100	100	100	100
147	0.212833	0.188667	0.188333	0.203833	0.190167	0.189333	0.180167	0.167167	0.162667	0.2005	0.1545	0.133333		1	1	1	1	1	1	1	1	1	1	1	1			0.212833	0.188667	0.188333	0.203833	0.190167	0.189333	0.180167	0.167167	0.162667	0.2005	0.1545	0.133333			101	101	101	101	101	101	101	101
148.5	0.219833	0.196667	0.193333	0.209833	0.195167	0.193333	0.188167	0.175167	0.167667	0.2045	0.1575	0.135333		1	1	1	1	1	1	1	1	1	1	1	1			0.219833	0.196667	0.193333	0.209833	0.195167	0.193333	0.188167	0.175167	0.167667	0.2045	0.1575	0.135333			102	102	102	102	102	102	102	102
150	0.224833	0.200667	0.197333	0.213833	0.201167	0.196333	0.192167	0.181167	0.173667	0.2095	0.1655	0.144333		1	1	1	1	1	1	1	1	1	1	1	1			0.224833	0.200667	0.197333	0.213833	0.201167	0.196333	0.192167	0.181167	0.173667	0.2095	0.1655	0.144333			103	103	103	103	103	103	103	103
151.5	0.224833	0.197667	0.199333	0.216833	0.199167	0.195333	0.192167	0.184167	0.174667	0.2135	0.1685	0.146333		1	1	1	1	1	1	1	1	1	1	1	1			0.224833	0.197667	0.199333	0.216833	0.199167	0.195333	0.192167	0.184167	0.174667	0.2135	0.1685	0.146333			104	104	104	104	104	104	104	104
153	0.225833	0.203667	0.198333	0.220833	0.203167	0.202333	0.198167	0.187167	0.177667	0.2145	0.1695	0.151333		1	1	1	1	1	1	1	1	1	1	1	1			0.225833	0.203667	0.198333	0.220833	0.203167	0.202333	0.198167	0.187167	0.177667	0.2145	0.1695	0.151333			105	105	105	105	105	105	105	105
154.5	0.230833	0.208667	0.205333	0.222833	0.210167	0.211333	0.200167	0.186167	0.184667	0.2185	0.1725	0.155333		1	1	1	1	1	1	1	1	1	1	1	1			0.230833	0.208667	0.205333	0.222833	0.210167	0.211333	0.200167	0.186167	0.184667	0.2185	0.1725	0.155333			106	106	106	106	106	106	106	106
156	0.235833	0.209667	0.209333	0.227833	0.211167	0.212333	0.206167	0.193167	0.185667	0.2225	0.1795	0.159333		1	1	1	1	1	1	1	1	1	1	1	1			0.235833	0.209667	0.209333	0.227833	0.211167	0.212333	0.206167	0.193167	0.185667	0.2225	0.1795	0.159333			107	107	107	107	107	107	107	107
157.5	0.235833	0.211667	0.214333	0.229833	0.219167	0.218333	0.211167	0.201167	0.189667	0.2285	0.1855	0.166333		1	1	1	1	1	1	1	1	1	1	1	1			0.235833	0.211667	0.214333	0.229833	0.219167	0.218333	0.211167	0.201167	0.189667	0.2285	0.1855	0.166333			108	108	108	108	108	108	108	108
159	0.236833	0.213667	0.217333	0.230833	0.219167	0.222333	0.212167	0.203167	0.195667	0.2315	0.1885	0.169333		1	1	1	1	1	1	1	1	1	1	1	1			0.236833	0.213667	0.217333	0.230833	0.219167	0.222333	0.212167	0.203167	0.195667	0.2315	0.1885	0.169333			109	109	109	109	109	109	109	109
160.5	0.235833	0.216667	0.220333	0.236833	0.224167	0.222333	0.217167	0.202167	0.195667	0.2345	0.1905	0.169333		1	1	1	1	1	1	1	1	1	1	1	1			0.235833	0.216667	0.220333	0.236833	0.224167	0.222333	0.217167	0.202167	0.195667	0.2345	0.1905	0.169333			110	110	110	110	110	110	110	110
162	0.240833	0.219667	0.222333	0.238833	0.226167	0.230333	0.223167	0.206167	0.198667	0.2395	0.1925	0.172333		1	1	1	1	1	1	1	1	1	1	1	1			0.240833	0.219667	0.222333	0.238833	0.226167	0.230333	0.223167	0.206167	0.198667	0.2395	0.1925	0.172333			111	111	111	111	111	111	111	111
163.5	0.246833	0.227667	0.227333	0.238833	0.226167	0.226333	0.223167	0.211167	0.203667	0.2405	0.1975	0.176333		1	1	1	1	1	1	1	1	1	1	1	1			0.246833	0.227667	0.227333	0.238833	0.226167	0.226333	0.223167	0.211167	0.203667	0.2405	0.1975	0.176333			112	112	112	112	112	112	112	112
165	0.253833	0.231667	0.229333	0.247833	0.228167	0.231333	0.225167	0.215167	0.207667	0.2445	0.1975	0.180333		1	1	1	1	1	1	1	1	1	1	1	1			0.253833	0.231667	0.229333	0.247833	0.228167	0.231333	0.225167	0.215167	0.207667	0.2445	0.1975	0.180333			113	113	113	113	113	113	113	113
166.5	0.257833	0.233667	0.229333	0.247833	0.234167	0.234333	0.233167	0.217167	0.211667	0.2505	0.2035	0.183333		1	1	1	1	1	1	1	1	1	1	1	1			0.257833	0.233667	0.229333	0.247833	0.234167	0.234333	0.233167	0.217167	0.211667	0.2505	0.2035	0.183333			114	114	114	114	114	114	114	114
168	0.257833	0.231667	0.235333	0.250833	0.235167	0.235333	0.235167	0.220167	0.215667	0.2525	0.2075	0.185333		1	1	1	1	1	1	1	1	1	1	1	1			0.257833	0.231667	0.235333	0.250833	0.235167	0.235333	0.235167	0.220167	0.215667	0.2525	0.2075	0.185333			115	115	115	115	115	115	115	115
169.5	0.265833	0.236667	0.243333	0.257833	0.238167	0.238333	0.234167	0.225167	0.215667	0.2535	0.2115	0.189333		1	1	1	1	1	1	1	1	1	1	1	1			0.265833	0.236667	0.243333	0.257833	0.238167	0.238333	0.234167	0.225167	0.215667	0.2535	0.2115	0.189333			116	116	116	116	116	116	116	116
171	0.268833	0.241667	0.247333	0.256833	0.245167	0.247333	0.242167	0.230167	0.216667	0.2595	0.2105	0.189333		1	1	1	1	1	1	1	1	1	1	1	1			0.268833	0.241667	0.247333	0.256833	0.245167	0.247333	0.242167	0.230167	0.216667	0.2595	0.2105	0.189333			117	117	117	117	117	117	117	117
172.5	0.271833	0.241667	0.244333	0.252833	0.245167	0.249333	0.241167	0.231167	0.218667	0.2625	0.2105	0.193333		1	1	1	1	1	1	1	1	1	1	1	1			0.271833	0.241667	0.244333	0.252833	0.245167	0.249333	0.241167	0.231167	0.218667	0.2625	0.2105	0.193333			118	118	118	118	118	118	118	118
174	0.271833	0.242667	0.249333	0.256833	0.244167	0.250333	0.247167	0.235167	0.226667	0.2675	0.2185	0.197333		1	1	1	1	1	1	1	1	1	1	1	1			0.271833	0.242667	0.249333	0.256833	0.244167	0.250333	0.247167	0.235167	0.226667	0.2675	0.2185	0.197333			119	119	119	119	119	119	119	119
175.5	0.278833	0.247667	0.251333	0.262833	0.248167	0.257333	0.253167	0.235167	0.228667	0.2715	0.2205	0.199333		1	1	1	1	1	1	1	1	1	1	1	1			0.278833	0.247667	0.251333	0.262833	0.248167	0.257333	0.253167	0.235167	0.228667	0.2715	0.2205	0.199333			120	120	120	120	120	120	120	120
177	0.282833	0.251667	0.251333	0.266833	0.254167	0.261333	0.261167	0.240167	0.230667	0.2715	0.2245	0.205333		1	1	1	1	1	1	1	1	1	1	1	1			0.282833	0.251667	0.251333	0.266833	0.254167	0.261333	0.261167	0.240167	0.230667	0.2715	0.2245	0.205333			121	121	121	121	121	121	121	121
178.5	0.280833	0.261667	0.247333	0.269833	0.257167	0.263333	0.264167	0.241167	0.236667	0.2755	0.2295	0.207333		1	1	1	1	1	1	1	1	1	1	1	1			0.280833	0.261667	0.247333	0.269833	0.257167	0.263333	0.264167	0.241167	0.236667	0.2755	0.2295	0.207333			122	122	122	122	122	122	122	122
180	0.281833	0.259667	0.247333	0.271833	0.262167	0.263333	0.268167	0.248167	0.237667	0.2795	0.2295	0.207333		1	1	1	1	1	1	1	1	1	1	1	1			0.281833	0.259667	0.247333	0.271833	0.262167	0.263333	0.268167	0.248167	0.237667	0.2795	0.2295	0.207333			123	123	123	123	123	123	123	123
181.5	0.284833	0.255667	0.249333	0.278833	0.262167	0.264333	0.269167	0.249167	0.239667	0.2815	0.2265	0.210333		1	1	1	1	1	1	1	1	1	1	1	1			0.284833	0.255667	0.249333	0.278833	0.262167	0.264333	0.269167	0.249167	0.239667	0.2815	0.2265	0.210333			124	124	124	124	124	124	124	124
183	0.290833	0.258667	0.261333	0.274833	0.265167	0.266333	0.277167	0.252167	0.243667	0.2855	0.2275	0.211333		1	1	1	1	1	1	1	1	1	1	1	1			0.290833	0.258667	0.261333	0.274833	0.265167	0.266333	0.277167	0.252167	0.243667	0.2855	0.2275	0.211333			125	125	125	125	125	125	125	125
184.5	0.288833	0.260667	0.261333	0.275833	0.268167	0.271333	0.276167	0.254167	0.245667	0.2885	0.2345	0.215333		1	1	1	1	1	1	1	1	1	1	1	1			0.288833	0.260667	0.261333	0.275833	0.268167	0.271333	0.276167	0.254167	0.245667	0.2885	0.2345	0.215333			126	126	126	126	126	126	126	126
186	0.292833	0.260667	0.261333	0.282833	0.271167	0.277333	0.272167	0.258167	0.247667	0.2905	0.2385	0.220333		1	1	1	1	1	1	1	1	1	1	1	1			0.292833	0.260667	0.261333	0.282833	0.271167	0.277333	0.272167	0.258167	0.247667	0.2905	0.2385	0.220333			127	127	127	127	127	127	127	127
187.5	0.295833	0.258667	0.270333	0.282833	0.272167	0.280333	0.278167	0.263167	0.248667	0.2945	0.2385	0.223333		1	1	1	1	1	1	1	1	1	1	1	1			0.295833	0.258667	0.270333	0.282833	0.272167	0.280333	0.278167	0.263167	0.248667	0.2945	0.2385	0.223333			128	128	128	128	128	128	128	128
189	0.300833	0.260667	0.269333	0.285833	0.272167	0.286333	0.279167	0.262167	0.255667	0.2985	0.2435	0.226333		1	1	1	1	1	1	1	1	1	1	1	1			0.300833	0.260667	0.269333	0.285833	0.272167	0.286333	0.279167	0.262167	0.255667	0.2985	0.2435	0.226333			129	129	129	129	129	129	129	129
190.5	0.305833	0.267667	0.271333	0.286833	0.277167	0.286333	0.281167	0.259167	0.258667	0.3035	0.2515	0.230333		1	1	1	1	1	1	1	1	1	1	1	1			0.305833	0.267667	0.271333	0.286833	0.277167	0.286333	0.281167	0.259167	0.258667	0.3035	0.2515	0.230333			130	130	130	130	130	130	130	130
192	0.304833	0.271667	0.274333	0.286833	0.278167	0.287333	0.279167	0.268167	0.258667	0.3065	0.2585	0.228333		1	1	1	1	1	1	1	1	1	1	1	1			0.304833	0.271667	0.274333	0.286833	0.278167	0.287333	0.279167	0.268167	0.258667	0.3065	0.2585	0.228333			131	131	131	131	131	131	131	131
193.5	0.302833	0.275667	0.276333	0.290833	0.279167	0.290333	0.280167	0.268167	0.260667	0.3075	0.2615	0.232333		1	1	1	1	1	1	1	1	1	1	1	1			0.302833	0.275667	0.276333	0.290833	0.279167	0.290333	0.280167	0.268167	0.260667	0.3075	0.2615	0.232333			132	132	132	132	132	132	132	132
195	0.308833	0.275667	0.285333	0.292833	0.283167	0.297333	0.288167	0.276167	0.262667	0.3145	0.2625	0.238333		1	1	1	1	1	1	1	1	1	1	1	1			0.308833	0.275667	0.285333	0.292833	0.283167	0.297333	0.288167	0.276167	0.262667	0.3145	0.2625	0.238333			133	133	133	133	133	133	133	133
196.5	0.316833	0.280667	0.287333	0.293833	0.287167	0.302333	0.295167	0.276167	0.264667	0.3175	0.2655	0.237333		1	1	1	1	1	1	1	1	1	1	1	1			0.316833	0.280667	0.287333	0.293833	0.287167	0.302333	0.295167	0.276167	0.264667	0.3175	0.2655	0.237333			134	134	134	134	134	134	134	134
198	0.318833	0.275667	0.290333	0.295833	0.293167	0.297333	0.299167	0.278167	0.266667	0.3195	0.2705	0.236333		1	1	1	1	1	1	1	1	1	1	1	1			0.318833	0.275667	0.290333	0.295833	0.293167	0.297333	0.299167	0.278167	0.266667	0.3195	0.2705	0.236333			135	135	135	135	135	135	135	135
199.5	0.316833	0.284667	0.294333	0.302833	0.302167	0.299333	0.301167	0.279167	0.273667	0.3235	0.2695	0.241333		1	1	1	1	1	1	1	1	1	1	1	1			0.316833	0.284667	0.294333	0.302833	0.302167	0.299333	0.301167	0.279167	0.273667	0.3235	0.2695	0.241333			136	136	136	136	136	136	136	136
201	0.318833	0.289667	0.297333	0.299833	0.306167	0.303333	0.301167	0.281167	0.277667	0.3285	0.2705	0.242333		1	1	1	1	1	1	1	1	1	1	1	1			0.318833	0.289667	0.297333	0.299833	0.306167	0.303333	0.301167	0.281167	0.277667	0.3285	0.2705	0.242333			137	137	137	137	137	137	137	137
202.5	0.323833	0.292667	0.301333	0.303833	0.313167	0.307333	0.302167	0.286167	0.277667	0.3325	0.2735	0.248333		1	1	1	1	1	1	1	1	1	1	1	1			0.323833	0.292667	0.301333	0.303833	0.313167	0.307333	0.302167	0.286167	0.277667	0.3325	0.2735	0.248333			138	138	138	138	138	138	138	138
204	0.325833	0.299667	0.301333	0.305833	0.312167	0.310333	0.303167	0.289167	0.276667	0.3305	0.2735	0.252333		1	1	1	1	1	1	1	1	1	1	1	1			0.325833	0.299667	0.301333	0.305833	0.312167	0.310333	0.303167	0.289167	0.276667	0.3305	0.2735	0.252333			139	139	139	139	139	139	139	139
205.5	0.328833	0.299667	0.307333	0.307833	0.320167	0.313333	0.307167	0.290167	0.280667	0.3385	0.2755	0.247333		1	1	1	1	1	1	1	1	1	1	1	1			0.328833	0.299667	0.307333	0.307833	0.320167	0.313333	0.307167	0.290167	0.280667	0.3385	0.2755	0.247333			140	140	140	140	140	140	140	140
207	0.325833	0.294667	0.307333	0.306833	0.322167	0.312333	0.309167	0.295167	0.283667	0.3355	0.2775	0.251333		1	1	1	1	1	1	1	1	1	1	1	1			0.325833	0.294667	0.307333	0.306833	0.322167	0.312333	0.309167	0.295167	0.283667	0.3355	0.2775	0.251333			141	141	141	141	141	141	141	141
208.5	0.330833	0.301667	0.308333	0.311833	0.315167	0.312333	0.312167	0.296167	0.281667	0.3375	0.2775	0.256333		1	1	1	1	1	1	1	1	1	1	1	1			0.330833	0.301667	0.308333	0.311833	0.315167	0.312333	0.312167	0.296167	0.281667	0.3375	0.2775	0.256333			142	142	142	142	142	142	142	142
210	0.337833	0.305667	0.317333	0.315833	0.315167	0.316333	0.316167	0.298167	0.281667	0.3425	0.2845	0.260333		1	1	1	1	1	1	1	1	1	1	1	1			0.337833	0.305667	0.317333	0.315833	0.315167	0.316333	0.316167	0.298167	0.281667	0.3425	0.2845	0.260333			143	143	143	143	143	143	143	143
211.5	0.338833	0.311667	0.315333	0.314833	0.318167	0.323333	0.316167	0.304167	0.283667	0.3425	0.2925	0.263333		1	1	1	1	1	1	1	1	1	1	1	1			0.338833	0.311667	0.315333	0.314833	0.318167	0.323333	0.316167	0.304167	0.283667	0.3425	0.2925	0.263333			144	144	144	144	144	144	144	144
213	0.336833	0.310667	0.317333	0.317833	0.321167	0.320333	0.314167	0.305167	0.285667	0.3405	0.2975	0.268333		1	1	1	1	1	1	1	1	1	1	1	1			0.336833	0.310667	0.317333	0.317833	0.321167	0.320333	0.314167	0.305167	0.285667	0.3405	0.2975	0.268333			145	145	145	145	145	145	145	145
214.5	0.338833	0.314667	0.318333	0.321833	0.321167	0.323333	0.323167	0.303167	0.293667	0.3465	0.2995	0.264333		1	1	1	1	1	1	1	1	1	1	1	1			0.338833	0.314667	0.318333	0.321833	0.321167	0.323333	0.323167	0.303167	0.293667	0.3465	0.2995	0.264333			146	146	146	146	146	146	146	146
216	0.344833	0.321667	0.323333	0.323833	0.319167	0.325333	0.329167	0.306167	0.301667	0.3515	0.3045	0.263333		1	1	1	1	1	1	1	1	1	1	1	1			0.344833	0.321667	0.323333	0.323833	0.319167	0.325333	0.329167	0.306167	0.301667	0.3515	0.3045	0.263333			147	147	147	147	147	147	147	147
217.5	0.347833	0.318667	0.323333	0.322833	0.329167	0.334333	0.331167	0.314167	0.302667	0.3515	0.3065	0.269333		1	1	1	1	1	1	1	1	1	1	1	1			0.347833	0.318667	0.323333	0.322833	0.329167	0.334333	0.331167	0.314167	0.302667	0.3515	0.3065	0.269333			148	148	148	148	148	148	148	148
219	0.346833	0.315667	0.332333	0.324833	0.335167	0.336333	0.329167	0.313167	0.304667	0.3535	0.3065	0.267333		1	1	1	1	1	1	1	1	1	1	1	1			0.346833	0.315667	0.332333	0.324833	0.335167	0.336333	0.329167	0.313167	0.304667	0.3535	0.3065	0.267333			149	149	149	149	149	149	149	149
220.5	0.348833	0.323667	0.331333	0.328833	0.331167	0.336333	0.334167	0.318167	0.308667	0.3605	0.3095	0.274333		1	1	1	1	1	1	1	1	1	1	1	1			0.348833	0.323667	0.331333	0.328833	0.331167	0.336333	0.334167	0.318167	0.308667	0.3605	0.3095	0.274333			150	150	150	150	150	150	150	150
222	0.348833	0.326667	0.325333	0.327833	0.332167	0.335333	0.340167	0.317167	0.301667	0.3645	0.3085	0.279333		1	1	1	1	1	1	1	1	1	1	1	1			0.348833	0.326667	0.325333	0.327833	0.332167	0.335333	0.340167	0.317167	0.301667	0.3645	0.3085	0.279333			151	151	151	151	151	151	151	151
223.5	0.352833	0.325667	0.330333	0.340833	0.341167	0.341333	0.336167	0.320167	0.299667	0.3635	0.3095	0.283333		1	1	1	1	1	1	1	1	1	1	1	1			0.352833	0.325667	0.330333	0.340833	0.341167	0.341333	0.336167	0.320167	0.299667	0.3635	0.3095	0.283333			152	152	152	152	152	152	152	152
225	0.358833	0.320667	0.332333	0.337833	0.349167	0.343333	0.340167	0.321167	0.307667	0.3615	0.3115	0.283333		1	1	1	1	1	1	1	1	1	1	1	1			0.358833	0.320667	0.332333	0.337833	0.349167	0.343333	0.340167	0.321167	0.307667	0.3615	0.3115	0.283333			153	153	153	153	153	153	153	153
226.5	0.366833	0.327667	0.329333	0.335833	0.352167	0.346333	0.336167	0.325167	0.320667	0.3655	0.3155	0.285333		1	1	1	1	1	1	1	1	1	1	1	1			0.366833	0.327667	0.329333	0.335833	0.352167	0.346333	0.336167	0.325167	0.320667	0.3655	0.3155	0.285333			154	154	154	154	154	154	154	154
228	0.366833	0.332667	0.336333	0.338833	0.350167	0.353333	0.336167	0.328167	0.317667	0.3725	0.3135	0.286333		1	1	1	1	1	1	1	1	1	1	1	1			0.366833	0.332667	0.336333	0.338833	0.350167	0.353333	0.336167	0.328167	0.317667	0.3725	0.3135	0.286333			155	155	155	155	155	155	155	155
229.5	0.373833	0.331667	0.348333	0.346833	0.351167	0.359333	0.336167	0.331167	0.322667	0.3785	0.3145	0.290333		1	1	1	1	1	1	1	1	1	1	1	1			0.373833	0.331667	0.348333	0.346833	0.351167	0.359333	0.336167	0.331167	0.322667	0.3785	0.3145	0.290333			156	156	156	156	156	156	156	156
231	0.371833	0.335667	0.350333	0.348833	0.345167	0.357333	0.342167	0.325167	0.325667	0.3765	0.3195	0.293333		1	1	1	1	1	1	1	1	1	1	1	1			0.371833	0.335667	0.350333	0.348833	0.345167	0.357333	0.342167	0.325167	0.325667	0.3765	0.3195	0.293333			157	157	157	157	157	157	157	157
232.5	0.375833	0.340667	0.350333	0.348833	0.345167	0.355333	0.347167	0.331167	0.321667	0.3795	0.3185	0.286333		1	1	1	1	1	1	1	1	1	1	1	1			0.375833	0.340667	0.350333	0.348833	0.345167	0.355333	0.347167	0.331167	0.321667	0.3795	0.3185	0.286333			158	158	158	158	158	158	158	158
234	0.376833	0.339667	0.351333	0.345833	0.354167	0.359333	0.354167	0.335167	0.326667	0.3815	0.3205	0.295333		1	1	1	1	1	1	1	1	1	1	1	1			0.376833	0.339667	0.351333	0.345833	0.354167	0.359333	0.354167	0.335167	0.326667	0.3815	0.3205	0.295333			159	159	159	159	159	159	159	159
235.5	0.380833	0.341667	0.351333	0.350833	0.358167	0.366333	0.354167	0.334167	0.336667	0.3835	0.3205	0.296333		1	1	1	1	1	1	1	1	1	1	1	1			0.380833	0.341667	0.351333	0.350833	0.358167	0.366333	0.354167	0.334167	0.336667	0.3835	0.3205	0.296333			160	160	160	160	160	160	160	160
237	0.384833	0.350667	0.355333	0.354833	0.361167	0.373333	0.359167	0.339167	0.331667	0.3885	0.3345	0.295333		1	1	1	1	1	1	1	1	1	1	1	1			0.384833	0.350667	0.355333	0.354833	0.361167	0.373333	0.359167	0.339167	0.331667	0.3885	0.3345	0.295333			161	161	161	161	161	161	161	161
238.5	0.385833	0.349667	0.360333	0.358833	0.366167	0.373333	0.362167	0.342167	0.332667	0.3905	0.3375	0.298333		1	1	1	1	1	1	1	1	1	1	1	1			0.385833	0.349667	0.360333	0.358833	0.366167	0.373333	0.362167	0.342167	0.332667	0.3905	0.3375	0.298333			162	162	162	162	162	162	162	162
240	0.391833	0.355667	0.355333	0.350833	0.370167	0.373333	0.360167	0.339167	0.330667	0.3865	0.3365	0.301333		1	1	1	1	1	1	1	1	1	1	1	1			0.391833	0.355667	0.355333	0.350833	0.370167	0.373333	0.360167	0.339167	0.330667	0.3865	0.3365	0.301333			163	163	163	163	163	163	163	163
241.5	0.389833	0.360667	0.365333	0.352833	0.373167	0.373333	0.360167	0.340167	0.340667	0.3915	0.3405	0.299333		1	1	1	1	1	1	1	1	1	1	1	1			0.389833	0.360667	0.365333	0.352833	0.373167	0.373333	0.360167	0.340167	0.340667	0.3915	0.3405	0.299333			164	164	164	164	164	164	164	164
243	0.380833	0.355667	0.368333	0.359833	0.376167	0.367333	0.367167	0.344167	0.343667	0.3985	0.3385	0.302333		1	1	1	1	1	1	1	1	1	1	1	1			0.380833	0.355667	0.368333	0.359833	0.376167	0.367333	0.367167	0.344167	0.343667	0.3985	0.3385	0.302333			165	165	165	165	165	165	165	165
244.5	0.387833	0.355667	0.364333	0.361833	0.375167	0.373333	0.374167	0.351167	0.341667	0.3975	0.3355	0.303333		1	1	1	1	1	1	1	1	1	1	1	1			0.387833	0.355667	0.364333	0.361833	0.375167	0.373333	0.374167	0.351167	0.341667	0.3975	0.3355	0.303333			166	166	166	166	166	166	166	166
246	0.387833	0.357667	0.371333	0.365833	0.376167	0.377333	0.376167	0.354167	0.341667	0.4015	0.3385	0.307333		1	1	1	1	1	1	1	1	1	1	1	1			0.387833	0.357667	0.371333	0.365833	0.376167	0.377333	0.376167	0.354167	0.341667	0.4015	0.3385	0.307333			167	167	167	167	167	167	167	167
247.5	0.395833	0.360667	0.367333	0.365833	0.382167	0.382333	0.373167	0.358167	0.348667	0.4045	0.3465	0.313333		1	1	1	1	1	1	1	1	1	1	1	1			0.395833	0.360667	0.367333	0.365833	0.382167	0.382333	0.373167	0.358167	0.348667	0.4045	0.3465	0.313333			168	168	168	168	168	168	168	168
249	0.400833	0.360667	0.368333	0.371833	0.378167	0.385333	0.370167	0.356167	0.352667	0.4085	0.3485	0.319333		1	1	1	1	1	1	1	1	1	1	1	1			0.400833	0.360667	0.368333	0.371833	0.378167	0.385333	0.370167	0.356167	0.352667	0.4085	0.3485	0.319333			169	169	169	169	169	169	169	169
250.5	0.401833	0.365667	0.371333	0.372833	0.369167	0.384333	0.375167	0.352167	0.359667	0.4115	0.3515	0.323333		1	1	1	1	1	1	1	1	1	1	1	1			0.401833	0.365667	0.371333	0.372833	0.369167	0.384333	0.375167	0.352167	0.359667	0.4115	0.3515	0.323333			170	170	170	170	170	170	170	170
252	0.407833	0.371667	0.375333	0.374833	0.384167	0.390333	0.374167	0.358167	0.356667	0.4125	0.3555	0.325333		1	1	1	1	1	1	1	1	1	1	1	1			0.407833	0.371667	0.375333	0.374833	0.384167	0.390333	0.374167	0.358167	0.356667	0.4125	0.3555	0.325333			171	171	171	171	171	171	171	171
253.5	0.407833	0.363667	0.373333	0.375833	0.382167	0.389333	0.379167	0.359167	0.356667	0.4105	0.3575	0.325333		1	1	1	1	1	1	1	1	1	1	1	1			0.407833	0.363667	0.373333	0.375833	0.382167	0.389333	0.379167	0.359167	0.356667	0.4105	0.3575	0.325333			172	172	172	172	172	172	172	172
255	0.412833	0.365667	0.380333	0.380833	0.385167	0.392333	0.382167	0.361167	0.364667	0.4165	0.3635	0.328333		1	1	1	1	1	1	1	1	1	1	1	1			0.412833	0.365667	0.380333	0.380833	0.385167	0.392333	0.382167	0.361167	0.364667	0.4165	0.3635	0.328333			173	173	173	173	173	173	173	173
256.5	0.416833	0.372667	0.380333	0.381833	0.386167	0.395333	0.383167	0.363167	0.366667	0.4185	0.3665	0.324333		1	1	1	1	1	1	1	1	1	1	1	1			0.416833	0.372667	0.380333	0.381833	0.386167	0.395333	0.383167	0.363167	0.366667	0.4185	0.3665	0.324333			174	174	174	174	174	174	174	174
258	0.414833	0.373667	0.378333	0.383833	0.389167	0.397333	0.384167	0.368167	0.359667	0.4225	0.3745	0.326333		1	1	1	1	1	1	1	1	1	1	1	1			0.414833	0.373667	0.378333	0.383833	0.389167	0.397333	0.384167	0.368167	0.359667	0.4225	0.3745	0.326333			175	175	175	175	175	175	175	175
259.5	0.413833	0.365667	0.376333	0.385833	0.392167	0.397333	0.384167	0.368167	0.362667	0.4215	0.3715	0.327333		1	1	1	1	1	1	1	1	1	1	1	1			0.413833	0.365667	0.376333	0.385833	0.392167	0.397333	0.384167	0.368167	0.362667	0.4215	0.3715	0.327333			176	176	176	176	176	176	176	176
261	0.412833	0.369667	0.379333	0.389833	0.398167	0.398333	0.388167	0.370167	0.371667	0.4255	0.3755	0.333333		1	1	1	1	1	1	1	1	1	1	1	1			0.412833	0.369667	0.379333	0.389833	0.398167	0.398333	0.388167	0.370167	0.371667	0.4255	0.3755	0.333333			177	177	177	177	177	177	177	177
262.5	0.418833	0.375667	0.376333	0.390833	0.394167	0.405333	0.391167	0.376167	0.374667	0.4265	0.3765	0.340333		1	1	1	1	1	1	1	1	1	1	1	1			0.418833	0.375667	0.376333	0.390833	0.394167	0.405333	0.391167	0.376167	0.374667	0.4265	0.3765	0.340333			178	178	178	178	178	178	178	178
264	0.416833	0.378667	0.383333	0.391833	0.395167	0.405333	0.396167	0.374167	0.374667	0.4305	0.3765	0.341333		1	1	1	1	1	1	1	1	1	1	1	1			0.416833	0.378667	0.383333	0.391833	0.395167	0.405333	0.396167	0.374167	0.374667	0.4305	0.3765	0.341333			179	179	179	179	179	179	179	179
265.5	0.413833	0.376667	0.390333	0.388833	0.402167	0.406333	0.394167	0.370167	0.368667	0.4285	0.3735	0.335333		1	1	1	1	1	1	1	1	1	1	1	1			0.413833	0.376667	0.390333	0.388833	0.402167	0.406333	0.394167	0.370167	0.368667	0.4285	0.3735	0.335333			180	180	180	180	180	180	180	180
267	0.420833	0.385667	0.396333	0.391833	0.405167	0.413333	0.391167	0.369167	0.376667	0.4335	0.3735	0.336333		1	1	1	1	1	1	1	1	1	1	1	1			0.420833	0.385667	0.396333	0.391833	0.405167	0.413333	0.391167	0.369167	0.376667	0.4335	0.3735	0.336333			181	181	181	181	181	181	181	181
268.5	0.424833	0.386667	0.396333	0.389833	0.402167	0.413333	0.393167	0.375167	0.378667	0.4355	0.3785	0.342333		1	1	1	1	1	1	1	1	1	1	1	1			0.424833	0.386667	0.396333	0.389833	0.402167	0.413333	0.393167	0.375167	0.378667	0.4355	0.3785	0.342333			182	182	182	182	182	182	182	182
270	0.423833	0.391667	0.406333	0.396833	0.404167	0.416333	0.399167	0.379167	0.374667	0.4395	0.3815	0.343333		1	1	1	1	1	1	1	1	1	1	1	1			0.423833	0.391667	0.406333	0.396833	0.404167	0.416333	0.399167	0.379167	0.374667	0.4395	0.3815	0.343333			183	183	183	183	183	183	183	183
[truncated: 54 more columns]

## Sheet: W42Q_inositol_2
	2020-07-14 W42Q 40 PIPES 10 mM pH 6.7 NaCl 150 mM inositol, X mM													2020-07-14 W42Q 40 PIPES 10 mM pH 6.7 NaCl 150 mM inositol, X mM														2020-07-14 W42Q 40 PIPES 10 mM pH 6.7 NaCl 150 mM inositol, X mM														2020-07-14 W42Q 40 PIPES 10 mM pH 6.7 NaCl 150 mM inositol, X mM
	0	10	20	30	40	60	80	110	140	180	220	270		0	10	20	30	40	60	80	110	140	180	220	270			0	10	20	30	40	60	80	110	140	180	220	270			0	10	20	30	40	60	80	110
0	0.0002	0	0	-0.0002	0	0.0002	0.0002	-0.0002	-0.0006	0	0	0		0	0	0	0	0	0	0	0	0	0	0	0			0	0	0	0	0	0	0	0	0	0	0	0			0	0	0	0	0	0	0	0
1.5	0.0002	0	0	-0.0002	0	0.0012	0.0002	0.0008	0.0004	0	0	0		0	0	0	0	0	0	0	0	0	0	0	0			0	0	0	0	0	0	0	0	0	0	0	0			0	0	0	0	0	0	0	0
3	-0.0008	0	0	-0.0002	0	0.0002	-0.0008	-0.0002	-0.0006	0	0	0		0	0	0	0	0	0	0	0	0	0	0	0			0	0	0	0	0	0	0	0	0	0	0	0			0	0	0	0	0	0	0	0
4.5	0.0002	0	0	-0.0002	0	-0.0008	0.0002	-0.0002	0.0004	0	0	0		0	0	0	0	0	0	0	0	0	0	0	0			0	0	0	0	0	0	0	0	0	0	0	0			0	0	0	0	0	0	0	0
6	0.0002	0	0	0.0008	0	-0.0008	0.0002	-0.0002	0.0004	0	0	0		0	0	0	0	0	0	0	0	0	0	0	0			0	0	0	0	0	0	0	0	0	0	0	0			0	0	0	0	0	0	0	0
7.5	0.0002	0	0	-0.0002	0	-0.0008	-0.0008	-0.0002	0.0004	0	0	0		0	0	0	0	0	0	0	0	0	0	0	0			0	0	0	0	0	0	0	0	0	0	0	0			0	0	0	0	0	0	0	0
9	0.0002	0.001	0	-0.0002	0	0.0002	0.0002	-0.0002	0.0004	0.001	0	0		0	0	0	0	0	0	0	0	0	0	0	0			0	0	0	0	0	0	0	0	0	0	0	0			0	0	0	0	0	0	0	0
10.5	-0.0008	0	0.001	0.0008	0	0.0012	0.0002	-0.0002	0.0004	0	0	0		0	0	0	0	0	0	0	0	0	0	0	0			0	0	0	0	0	0	0	0	0	0	0	0			0	0	0	0	0	0	0	0
12	0.0002	0	0	-0.0002	0	0.0012	0.0002	-0.0002	0.0004	0	0	0		0	0	0	0	0	0	0	0	0	0	0	0			0	0	0	0	0	0	0	0	0	0	0	0			0	0	0	0	0	0	0	0
13.5	0.0002	0	0.001	-0.0002	0	0.0012	0.0002	-0.0002	0.0004	0.001	0	0		0	0	0	0	0	0	0	0	0	0	0	0			0	0	0	0	0	0	0	0	0	0	0	0			0	0	0	0	0	0	0	0
15	0.0002	0	0	-0.0002	0	0.0022	0.0002	-0.0002	0.0004	0	0	0		0	0	0	0	0	0	0	0	0	0	0	0			0	0	0	0	0	0	0	0	0	0	0	0			0	0	0	0	0	0	0	0
16.5	0.0002	0	0.001	-0.0002	0	0.0022	0.0002	-0.0002	0.0004	0	0	0		0	0	0	0	0	0	0	0	0	0	0	0			0	0	0	0	0	0	0	0	0	0	0	0			0	0	0	0	0	0	0	0
18	0.0012	0.001	0.001	-0.0002	0	0.0032	0.0002	-0.0002	0.0004	0	0	0		0	0	0	0	0	0	0	0	0	0	0	0			0	0	0	0	0	0	0	0	0	0	0	0			0	0	0	0	0	0	0	0
19.5	0.0002	0.001	0.001	-0.0002	0	0.0032	0.0002	-0.0002	0.0004	0.001	0	0		0	0	0	0	0	0	0	0	0	0	0	0			0	0	0	0	0	0	0	0	0	0	0	0			0	0	0	0	0	0	0	0
21	0.0012	0	0.001	0.0008	0	0.0042	0.0002	-0.0002	0.0004	0	0	0		0	0	0	0	0	0	0	0	0	0	0	0			0	0	0	0	0	0	0	0	0	0	0	0			0	0	0	0	0	0	0	0
22.5	0.0012	0.001	0.001	0.0008	0.001	0.0042	0.0002	-0.0002	0.0004	0.001	0.001	0		0	0	0	0	0	0	0	0	0	0	0	0			0	0	0	0	0	0	0	0	0	0	0	0			0	0	0	0	0	0	0	0
24	0.0002	0.001	0.002	0.0008	0	0.0052	0.0002	-0.0002	0.0014	0.001	0	0		0	0	0	0	0	0	0	0	0	0	0	0			0	0	0	0	0	0	0	0	0	0	0	0			0	0	0	0	0	0	0	0
25.5	0.0012	0.002	0.002	0.0008	0.001	0.0052	0.0012	-0.0002	0.0014	0.001	0.001	0		0	0	0	0	0	0	0	0	0	0	0	0			0	0	0	0	0	0	0	0	0	0	0	0			0	0	0	0	0	0	0	0
27	0.0002	0.001	0.001	0.0008	0	0.0042	0.0002	0.0008	0.0004	0	0	0		0	0	0	0	0	0	0	0	0	0	0	0			0	0	0	0	0	0	0	0	0	0	0	0			0	0	0	0	0	0	0	0
28.5	0.0002	0.001	0.001	0.0008	0.001	0.0052	0.0012	-0.0002	0.0014	0.001	0.001	0		0	0	0	0	0	0	0	0	0	0	0	0			0	0	0	0	0	0	0	0	0	0	0	0			0	0	0	0	0	0	0	0
30	0.0012	0.001	0.001	0.0008	0.001	0.0052	0.0012	0.0008	0.0014	0.001	0.001	0.001		0	0	0	0	0	0	0	0	0	0	0	0			0	0	0	0	0	0	0	0	0	0	0	0			0	0	0	0	0	0	0	0
31.5	0.0012	0.001	0.002	0.0008	0.001	0.0052	0.0012	0.0008	0.0014	0.001	0.001	0		0	0	0	0	0	0	0	0	0	0	0	0			0	0	0	0	0	0	0	0	0	0	0	0			0	0	0	0	0	0	0	0
33	0.0012	0.002	0.002	0.0018	0.001	0.0052	0.0012	0.0008	0.0014	0.001	0.001	0.001		0	0	0	0	0	0	0	0	0	0	0	0			0	0	0	0	0	0	0	0	0	0	0	0			0	0	0	0	0	0	0	0
34.5	0.0012	0.001	0.001	0.0008	0.001	0.0042	0.0002	-0.0002	0.0004	0.001	0	0		0	0	0	0	0	0	0	0	0	0	0	0			0	0	0	0	0	0	0	0	0	0	0	0			0	0	0	0	0	0	0	0
36	0.0012	0.001	0.002	0.0008	0.001	0.0052	0.0012	0.0008	0.0014	0.001	0.001	0.001		0	0	0	0	0	0	0	0	0	0	0	0			0	0	0	0	0	0	0	0	0	0	0	0			0	0	0	0	0	0	0	0
37.5	0.0012	0.001	0.002	0.0008	0.001	0.0042	0.0002	0.0008	0.0014	0.001	0.001	0		0	0	0	0	0	0	0	0	0	0	0	0			0	0	0	0	0	0	0	0	0	0	0	0			0	0	0	0	0	0	0	0
39	0.0012	0.001	0.001	0.0008	0.001	0.0052	0.0002	-0.0002	0.0014	0.001	0.001	0		0	0	0	0	0	0	0	0	0	0	0	0			0	0	0	0	0	0	0	0	0	0	0	0			0	0	0	0	0	0	0	0
40.5	0.0022	0.002	0.002	0.0018	0.001	0.0052	0.0022	0.0008	0.0014	0.002	0.001	0.001		0	0	0	0	0	0	0	0	0	0	0	0			0	0	0	0	0	0	0	0	0	0	0	0			0	0	0	0	0	0	0	0
42	0.0012	0.002	0.002	0.0008	0.001	0.0052	0.0012	0.0008	0.0014	0.001	0.001	0		0	0	0	0	0	0	0	0	0	0	0	0			0	0	0	0	0	0	0	0	0	0	0	0			0	0	0	0	0	0	0	0
43.5	0.0022	0.002	0.002	0.0018	0.001	0.0052	0.0012	0.0008	0.0014	0.001	0.001	0.001		0	0	0	0	0	0	0	0	0	0	0	0			0	0	0	0	0	0	0	0	0	0	0	0			0	0	0	0	0	0	0	0
45	0.0022	0.002	0.002	0.0018	0.002	0.0052	0.0012	0.0008	0.0014	0.001	0.001	0		0	0	0	0	0	0	0	0	0	0	0	0			0	0	0	0	0	0	0	0	0	0	0	0			0	0	0	0	0	0	0	0
46.5	0.0022	0.002	0.002	0.0018	0.001	0.0052	0.0012	0.0008	0.0014	0.001	0.001	0.001		0	0	0	0	0	0	0	0	0	0	0	0			0	0	0	0	0	0	0	0	0	0	0	0			0	0	0	0	0	0	0	0
48	0.0022	0.002	0.002	0.0018	0.001	0.0052	0.0012	0.0008	0.0014	0.001	0.001	0.001		0	0	0	0	0	0	0	0	0	0	0	0			0	0	0	0	0	0	0	0	0	0	0	0			0	0	0	0	0	0	0	0
49.5	0.0022	0.002	0.002	0.0018	0.001	0.0052	0.0012	0.0008	0.0014	0.001	0.001	0.001		0	0	0	0	0	0	0	0	0	0	0	0			0	0	0	0	0	0	0	0	0	0	0	0			0	0	0	0	0	0	0	0
51	0.0022	0.002	0.002	0.0018	0.001	0.0052	0.0012	0.0008	0.0014	0.001	0.001	0.001		0	0	0	0	0	0	0	0	0	0	0	0			0	0	0	0	0	0	0	0	0	0	0	0			0	0	0	0	0	0	0	0
52.5	0.0022	0.002	0.002	0.0018	0.001	0.0052	0.0012	0.0008	0.0014	0.002	0.001	0.001		0	0	0	0	0	0	0	0	0	0	0	0			0	0	0	0	0	0	0	0	0	0	0	0			0	0	0	0	0	0	0	0
54	0.0032	0.002	0.002	0.0028	0.002	0.0052	0.0012	0.0018	0.0014	0.001	0.001	0.001		0	0	0	0	0	0	0	0	0	0	0	0			0	0	0	0	0	0	0	0	0	0	0	0			0	0	0	0	0	0	0	0
55.5	0.0032	0.003	0.002	0.0018	0.002	0.0062	0.0012	0.0008	0.0014	0.002	0.001	0.001		0	0	0	0	0	0	0	0	0	0	0	0			0	0	0	0	0	0	0	0	0	0	0	0			0	0	0	0	0	0	0	0
57	0.0032	0.003	0.003	0.0028	0.002	0.0062	0.0022	0.0018	0.0024	0.002	0.002	0.001		0	0	0	0	0	0	0	0	0	0	0	0			0	0	0	0	0	0	0	0	0	0	0	0			0	0	0	0	0	0	0	0
58.5	0.0042	0.003	0.003	0.0028	0.002	0.0062	0.0012	0.0008	0.0014	0.002	0.001	0.001		0	0	0	0	0	0	0	0	0	0	0	0			0	0	0	0	0	0	0	0	0	0	0	0			0	0	0	0	0	0	0	0
60	0.0042	0.003	0.003	0.0018	0.001	0.0062	0.0012	0.0008	0.0014	0.001	0.001	0		0	0	0	0	0	0	0	0	0	0	0	0			0	0	0	0	0	0	0	0	0	0	0	0			0	0	0	0	0	0	0	0
61.5	0.0042	0.004	0.003	0.0028	0.002	0.0062	0.0022	0.0008	0.0014	0.001	0.001	0.001		0	0	0	0	0	0	0	0	0	0	0	0			0	0	0	0	0	0	0	0	0	0	0	0			0	0	0	0	0	0	0	0
63	0.0052	0.004	0.003	0.0028	0.002	0.0062	0.0022	0.0008	0.0014	0.001	0.001	0		0	0	0	0	0	0	0	0	0	0	0	0			0	0	0	0	0	0	0	0	0	0	0	0			0	0	0	0	0	0	0	0
64.5	0.0082	0.005	0.004	0.0038	0.003	0.0072	0.0022	0.0018	0.0024	0.002	0.002	0.001		0	0	0	0	0	0	0	0	0	0	0	0			0	0	0	0	0	0	0	0	0	0	0	0			0	0	0	0	0	0	0	0
66	0.0092	0.006	0.005	0.0038	0.003	0.0062	0.0022	0.0018	0.0024	0.002	0.001	0.001		0	0	0	0	0	0	0	0	0	0	0	0			0	0	0	0	0	0	0	0	0	0	0	0			0	0	0	0	0	0	0	0
67.5	0.0102	0.006	0.005	0.0038	0.003	0.0062	0.0022	0.0018	0.0014	0.001	0.001	0.001		0	0	0	0	0	0	0	0	0	0	0	0			0	0	0	0	0	0	0	0	0	0	0	0			0	0	0	0	0	0	0	0
69	0.0132	0.008	0.006	0.0048	0.004	0.0072	0.0032	0.0018	0.0014	0.002	0.001	0.001		0	0	0	0	0	0	0	0	0	0	0	0			0	0	0	0	0	0	0	0	0	0	0	0			0	0	0	0	0	0	0	0
70.5	0.0162	0.009	0.007	0.0058	0.004	0.0072	0.0022	0.0018	0.0024	0.001	0.001	0.001		0	0	0	0	0	0	0	0	0	0	0	0			0	0	0	0	0	0	0	0	0	0	0	0			0	0	0	0	0	0	0	0
72	0.0192	0.01	0.009	0.0068	0.005	0.0082	0.0032	0.0018	0.0014	0.002	0.001	0.001		0	0	0	0	0	0	0	0	0	0	0	0			0	0	0	0	0	0	0	0	0	0	0	0			0	0	0	0	0	0	0	0
73.5	0.0252	0.013	0.011	0.0088	0.006	0.0082	0.0042	0.0028	0.0024	0.002	0.002	0.001		0	0	0	0	0	0	0	0	0	0	0	0			0	0	0	0	0	0	0	0	0	0	0	0			0	0	0	0	0	0	0	0
75	0.0292	0.016	0.013	0.0098	0.007	0.0092	0.0042	0.0028	0.0024	0.002	0.002	0.001		0	0	0	0	0	0	0	0	0	0	0	0			0	0	0	0	0	0	0	0	0	0	0	0			0	0	0	0	0	0	0	0
76.5	0.0342	0.018	0.015	0.0108	0.009	0.0102	0.0042	0.0028	0.0024	0.002	0.001	0.001		0	0	0	0	0	0	0	0	0	0	0	0			0	0	0	0	0	0	0	0	0	0	0	0			0	0	0	0	0	0	0	0
78	0.0402	0.022	0.018	0.0148	0.01	0.0102	0.0052	0.0028	0.0024	0.002	0.001	0.001		0	0	0	0	0	0	0	0	0	0	0	0			0	0	0	0	0	0	0	0	0	0	0	0			0	0	0	0	0	0	0	0
79.5	0.0462	0.027	0.022	0.0168	0.013	0.0132	0.0062	0.0038	0.0034	0.002	0.002	0.001		1	0	0	0	0	0	0	0	0	0	0	0			0.0462	0	0	0	0	0	0	0	0	0	0	0			56	0	0	0	0	0	0	0
81	0.0562	0.031	0.026	0.0198	0.015	0.0142	0.0072	0.0038	0.0024	0.002	0.001	0.001		1	0	0	0	0	0	0	0	0	0	0	0			0.0562	0	0	0	0	0	0	0	0	0	0	0			57	0	0	0	0	0	0	0
82.5	0.0652	0.038	0.031	0.0228	0.019	0.0162	0.0092	0.0048	0.0034	0.002	0.002	0.001		1	0	0	0	0	0	0	0	0	0	0	0			0.0652	0	0	0	0	0	0	0	0	0	0	0			58	0	0	0	0	0	0	0
84	0.0692	0.045	0.036	0.0278	0.022	0.0182	0.0112	0.0048	0.0034	0.002	0.002	0.001		1	1	0	0	0	0	0	0	0	0	0	0			0.0692	0.045	0	0	0	0	0	0	0	0	0	0			59	59	0	0	0	0	0	0
85.5	0.0822	0.051	0.041	0.0338	0.026	0.0202	0.0132	0.0068	0.0044	0.003	0.002	0.001		1	1	0	0	0	0	0	0	0	0	0	0			0.0822	0.051	0	0	0	0	0	0	0	0	0	0			60	60	0	0	0	0	0	0
87	0.0932	0.058	0.047	0.0378	0.031	0.0242	0.0152	0.0078	0.0044	0.003	0.002	0.001		1	1	1	0	0	0	0	0	0	0	0	0			0.0932	0.058	0.047	0	0	0	0	0	0	0	0	0			61	61	61	0	0	0	0	0
88.5	0.1032	0.066	0.052	0.0448	0.036	0.0282	0.0182	0.0088	0.0054	0.003	0.002	0.002		1	1	1	0	0	0	0	0	0	0	0	0			0.1032	0.066	0.052	0	0	0	0	0	0	0	0	0			62	62	62	0	0	0	0	0
90	0.1142	0.072	0.061	0.0508	0.041	0.0312	0.0212	0.0098	0.0054	0.003	0.002	0.001		1	1	1	1	0	0	0	0	0	0	0	0			0.1142	0.072	0.061	0.0508	0	0	0	0	0	0	0	0			63	63	63	63	0	0	0	0
91.5	0.1242	0.082	0.067	0.0578	0.047	0.0372	0.0252	0.0118	0.0074	0.003	0.002	0.002		1	1	1	1	1	0	0	0	0	0	0	0			0.1242	0.082	0.067	0.0578	0.047	0	0	0	0	0	0	0			64	64	64	64	64	0	0	0
93	0.1342	0.091	0.075	0.0648	0.052	0.0412	0.0292	0.0148	0.0074	0.005	0.003	0.002		1	1	1	1	1	0	0	0	0	0	0	0			0.1342	0.091	0.075	0.0648	0.052	0	0	0	0	0	0	0			65	65	65	65	65	0	0	0
94.5	0.1432	0.099	0.083	0.0718	0.06	0.0452	0.0322	0.0168	0.0084	0.004	0.002	0.002		1	1	1	1	1	1	0	0	0	0	0	0			0.1432	0.099	0.083	0.0718	0.06	0.0452	0	0	0	0	0	0			66	66	66	66	66	66	0	0
96	0.1562	0.109	0.092	0.0808	0.066	0.0512	0.0382	0.0188	0.0094	0.005	0.003	0.002		1	1	1	1	1	1	0	0	0	0	0	0			0.1562	0.109	0.092	0.0808	0.066	0.0512	0	0	0	0	0	0			67	67	67	67	67	67	0	0
97.5	0.1682	0.118	0.103	0.0888	0.073	0.0562	0.0432	0.0218	0.0114	0.006	0.003	0.002		1	1	1	1	1	1	0	0	0	0	0	0			0.1682	0.118	0.103	0.0888	0.073	0.0562	0	0	0	0	0	0			68	68	68	68	68	68	0	0
99	0.1792	0.131	0.11	0.0958	0.082	0.0622	0.0482	0.0248	0.0124	0.006	0.003	0.002		1	1	1	1	1	1	1	0	0	0	0	0			0.1792	0.131	0.11	0.0958	0.082	0.0622	0.0482	0	0	0	0	0			69	69	69	69	69	69	69	0
100.5	0.1862	0.139	0.122	0.1018	0.091	0.0692	0.0522	0.0288	0.0144	0.007	0.003	0.002		1	1	1	1	1	1	1	0	0	0	0	0			0.1862	0.139	0.122	0.1018	0.091	0.0692	0.0522	0	0	0	0	0			70	70	70	70	70	70	70	0
102	0.2002	0.149	0.133	0.1148	0.099	0.0762	0.0592	0.0328	0.0174	0.008	0.004	0.003		1	1	1	1	1	1	1	0	0	0	0	0			0.2002	0.149	0.133	0.1148	0.099	0.0762	0.0592	0	0	0	0	0			71	71	71	71	71	71	71	0
103.5	0.2082	0.158	0.141	0.1228	0.105	0.0832	0.0662	0.0368	0.0194	0.009	0.004	0.002		1	1	1	1	1	1	1	0	0	0	0	0			0.2082	0.158	0.141	0.1228	0.105	0.0832	0.0662	0	0	0	0	0			72	72	72	72	72	72	72	0
105	0.2192	0.167	0.151	0.1338	0.116	0.0892	0.0712	0.0398	0.0214	0.01	0.004	0.003		1	1	1	1	1	1	1	0	0	0	0	0			0.2192	0.167	0.151	0.1338	0.116	0.0892	0.0712	0	0	0	0	0			73	73	73	73	73	73	73	0
106.5	0.2312	0.178	0.161	0.1388	0.122	0.0972	0.0772	0.0448	0.0254	0.011	0.005	0.003		1	1	1	1	1	1	1	0	0	0	0	0			0.2312	0.178	0.161	0.1388	0.122	0.0972	0.0772	0	0	0	0	0			74	74	74	74	74	74	74	0
108	0.2382	0.188	0.172	0.1488	0.129	0.1052	0.0862	0.0508	0.0284	0.013	0.006	0.003		1	1	1	1	1	1	1	1	0	0	0	0			0.2382	0.188	0.172	0.1488	0.129	0.1052	0.0862	0.0508	0	0	0	0			75	75	75	75	75	75	75	75
109.5	0.2452	0.195	0.177	0.1588	0.14	0.1132	0.0922	0.0548	0.0314	0.014	0.006	0.003		1	1	1	1	1	1	1	1	0	0	0	0			0.2452	0.195	0.177	0.1588	0.14	0.1132	0.0922	0.0548	0	0	0	0			76	76	76	76	76	76	76	76
111	0.2552	0.207	0.187	0.1688	0.151	0.1202	0.0982	0.0608	0.0354	0.017	0.007	0.004		1	1	1	1	1	1	1	1	0	0	0	0			0.2552	0.207	0.187	0.1688	0.151	0.1202	0.0982	0.0608	0	0	0	0			77	77	77	77	77	77	77	77
112.5	0.2672	0.22	0.197	0.1768	0.159	0.1252	0.1072	0.0658	0.0394	0.019	0.008	0.005		1	1	1	1	1	1	1	1	0	0	0	0			0.2672	0.22	0.197	0.1768	0.159	0.1252	0.1072	0.0658	0	0	0	0			78	78	78	78	78	78	78	78
114	0.2782	0.228	0.208	0.1888	0.164	0.1372	0.1152	0.0728	0.0434	0.021	0.009	0.005		1	1	1	1	1	1	1	1	0	0	0	0			0.2782	0.228	0.208	0.1888	0.164	0.1372	0.1152	0.0728	0	0	0	0			79	79	79	79	79	79	79	79
115.5	0.2842	0.234	0.217	0.1978	0.173	0.1442	0.1212	0.0788	0.0474	0.023	0.01	0.005		1	1	1	1	1	1	1	1	1	0	0	0			0.2842	0.234	0.217	0.1978	0.173	0.1442	0.1212	0.0788	0.0474	0	0	0			80	80	80	80	80	80	80	80
117	0.2912	0.243	0.219	0.2038	0.186	0.1512	0.1292	0.0838	0.0524	0.025	0.011	0.006		1	1	1	1	1	1	1	1	1	0	0	0			0.2912	0.243	0.219	0.2038	0.186	0.1512	0.1292	0.0838	0.0524	0	0	0			81	81	81	81	81	81	81	81
118.5	0.3012	0.253	0.23	0.2108	0.19	0.1592	0.1382	0.0908	0.0554	0.028	0.012	0.007		1	1	1	1	1	1	1	1	1	0	0	0			0.3012	0.253	0.23	0.2108	0.19	0.1592	0.1382	0.0908	0.0554	0	0	0			82	82	82	82	82	82	82	82
120	0.3142	0.257	0.241	0.2198	0.197	0.1662	0.1432	0.0948	0.0604	0.031	0.013	0.007		1	1	1	1	1	1	1	1	1	0	0	0			0.3142	0.257	0.241	0.2198	0.197	0.1662	0.1432	0.0948	0.0604	0	0	0			83	83	83	83	83	83	83	83
121.5	0.3172	0.27	0.25	0.2308	0.206	0.1742	0.1512	0.1038	0.0654	0.034	0.015	0.008		1	1	1	1	1	1	1	1	1	0	0	0			0.3172	0.27	0.25	0.2308	0.206	0.1742	0.1512	0.1038	0.0654	0	0	0			84	84	84	84	84	84	84	84
123	0.3252	0.275	0.259	0.2388	0.213	0.1812	0.1572	0.1098	0.0714	0.037	0.017	0.009		1	1	1	1	1	1	1	1	1	0	0	0			0.3252	0.275	0.259	0.2388	0.213	0.1812	0.1572	0.1098	0.0714	0	0	0			85	85	85	85	85	85	85	85
124.5	0.3332	0.285	0.267	0.2488	0.218	0.1892	0.1652	0.1158	0.0754	0.041	0.018	0.01		1	1	1	1	1	1	1	1	1	0	0	0			0.3332	0.285	0.267	0.2488	0.218	0.1892	0.1652	0.1158	0.0754	0	0	0			86	86	86	86	86	86	86	86
126	0.3472	0.291	0.276	0.2548	0.229	0.1972	0.1722	0.1218	0.0814	0.045	0.02	0.011		1	1	1	1	1	1	1	1	1	1	0	0			0.3472	0.291	0.276	0.2548	0.229	0.1972	0.1722	0.1218	0.0814	0.045	0	0			87	87	87	87	87	87	87	87
127.5	0.3512	0.297	0.282	0.2648	0.238	0.2032	0.1812	0.1268	0.0874	0.049	0.023	0.013		1	1	1	1	1	1	1	1	1	1	0	0			0.3512	0.297	0.282	0.2648	0.238	0.2032	0.1812	0.1268	0.0874	0.049	0	0			88	88	88	88	88	88	88	88
129	0.3542	0.318	0.292	0.2708	0.242	0.2072	0.1852	0.1338	0.0904	0.052	0.024	0.014		1	1	1	1	1	1	1	1	1	1	0	0			0.3542	0.318	0.292	0.2708	0.242	0.2072	0.1852	0.1338	0.0904	0.052	0	0			89	89	89	89	89	89	89	89
130.5	0.3612	0.32	0.295	0.2778	0.248	0.2152	0.1922	0.1388	0.0954	0.055	0.026	0.015		1	1	1	1	1	1	1	1	1	1	0	0			0.3612	0.32	0.295	0.2778	0.248	0.2152	0.1922	0.1388	0.0954	0.055	0	0			90	90	90	90	90	90	90	90
132	0.3732	0.329	0.301	0.2838	0.261	0.2242	0.1992	0.1458	0.1004	0.059	0.029	0.017		1	1	1	1	1	1	1	1	1	1	0	0			0.3732	0.329	0.301	0.2838	0.261	0.2242	0.1992	0.1458	0.1004	0.059	0	0			91	91	91	91	91	91	91	91
133.5	0.3832	0.33	0.311	0.2868	0.267	0.2282	0.2082	0.1518	0.1064	0.063	0.032	0.019		1	1	1	1	1	1	1	1	1	1	0	0			0.3832	0.33	0.311	0.2868	0.267	0.2282	0.2082	0.1518	0.1064	0.063	0	0			92	92	92	92	92	92	92	92
135	0.3952	0.344	0.32	0.2958	0.276	0.2322	0.2162	0.1568	0.1124	0.068	0.034	0.02		1	1	1	1	1	1	1	1	1	1	0	0			0.3952	0.344	0.32	0.2958	0.276	0.2322	0.2162	0.1568	0.1124	0.068	0	0			93	93	93	93	93	93	93	93
136.5	0.4012	0.355	0.328	0.3048	0.281	0.2422	0.2222	0.1658	0.1174	0.073	0.037	0.022		1	1	1	1	1	1	1	1	1	1	0	0			0.4012	0.355	0.328	0.3048	0.281	0.2422	0.2222	0.1658	0.1174	0.073	0	0			94	94	94	94	94	94	94	94
138	0.4062	0.359	0.33	0.3128	0.294	0.2502	0.2272	0.1708	0.1224	0.076	0.04	0.024		1	1	1	1	1	1	1	1	1	1	0	0			0.4062	0.359	0.33	0.3128	0.294	0.2502	0.2272	0.1708	0.1224	0.076	0	0			95	95	95	95	95	95	95	95
139.5	0.4152	0.362	0.336	0.3248	0.291	0.2562	0.2312	0.1748	0.1274	0.08	0.042	0.025		1	1	1	1	1	1	1	1	1	1	0	0			0.4152	0.362	0.336	0.3248	0.291	0.2562	0.2312	0.1748	0.1274	0.08	0	0			96	96	96	96	96	96	96	96
141	0.4202	0.37	0.351	0.3288	0.297	0.2602	0.2342	0.1808	0.1344	0.085	0.047	0.028		1	1	1	1	1	1	1	1	1	1	1	0			0.4202	0.37	0.351	0.3288	0.297	0.2602	0.2342	0.1808	0.1344	0.085	0.047	0			97	97	97	97	97	97	97	97
142.5	0.4292	0.375	0.355	0.3328	0.307	0.2692	0.2402	0.1878	0.1394	0.09	0.049	0.031		1	1	1	1	1	1	1	1	1	1	1	0			0.4292	0.375	0.355	0.3328	0.307	0.2692	0.2402	0.1878	0.1394	0.09	0.049	0			98	98	98	98	98	98	98	98
144	0.4322	0.387	0.358	0.3368	0.311	0.2712	0.2492	0.1908	0.1444	0.093	0.053	0.033		1	1	1	1	1	1	1	1	1	1	1	0			0.4322	0.387	0.358	0.3368	0.311	0.2712	0.2492	0.1908	0.1444	0.093	0.053	0			99	99	99	99	99	99	99	99
145.5	0.4422	0.393	0.36	0.3448	0.314	0.2792	0.2542	0.1968	0.1494	0.099	0.056	0.035		1	1	1	1	1	1	1	1	1	1	1	0			0.4422	0.393	0.36	0.3448	0.314	0.2792	0.2542	0.1968	0.1494	0.099	0.056	0			100	100	100	100	100	100	100	100
147	0.4482	0.396	0.364	0.3518	0.32	0.2862	0.2602	0.2068	0.1544	0.104	0.06	0.038		1	1	1	1	1	1	1	1	1	1	1	0			0.4482	0.396	0.364	0.3518	0.32	0.2862	0.2602	0.2068	0.1544	0.104	0.06	0			101	101	101	101	101	101	101	101
148.5	0.4482	0.399	0.376	0.3618	0.328	0.2912	0.2662	0.2108	0.1594	0.108	0.062	0.04		1	1	1	1	1	1	1	1	1	1	1	0			0.4482	0.399	0.376	0.3618	0.328	0.2912	0.2662	0.2108	0.1594	0.108	0.062	0			102	102	102	102	102	102	102	102
150	0.4642	0.405	0.382	0.3678	0.335	0.2952	0.2732	0.2138	0.1634	0.111	0.066	0.043		1	1	1	1	1	1	1	1	1	1	1	0			0.4642	0.405	0.382	0.3678	0.335	0.2952	0.2732	0.2138	0.1634	0.111	0.066	0			103	103	103	103	103	103	103	103
151.5	0.4702	0.411	0.379	0.3688	0.333	0.2982	0.2762	0.2198	0.1684	0.115	0.069	0.046		1	1	1	1	1	1	1	1	1	1	1	1			0.4702	0.411	0.379	0.3688	0.333	0.2982	0.2762	0.2198	0.1684	0.115	0.069	0.046			104	104	104	104	104	104	104	104
153	0.4762	0.415	0.393	0.3698	0.342	0.3052	0.2832	0.2238	0.1704	0.12	0.073	0.048		1	1	1	1	1	1	1	1	1	1	1	1			0.4762	0.415	0.393	0.3698	0.342	0.3052	0.2832	0.2238	0.1704	0.12	0.073	0.048			105	105	105	105	105	105	105	105
154.5	0.4782	0.421	0.403	0.3758	0.349	0.3132	0.2922	0.2278	0.1774	0.124	0.076	0.051		1	1	1	1	1	1	1	1	1	1	1	1			0.4782	0.421	0.403	0.3758	0.349	0.3132	0.2922	0.2278	0.1774	0.124	0.076	0.051			106	106	106	106	106	106	106	106
156	0.4742	0.436	0.402	0.3848	0.357	0.3202	0.2982	0.2308	0.1824	0.127	0.08	0.054		1	1	1	1	1	1	1	1	1	1	1	1			0.4742	0.436	0.402	0.3848	0.357	0.3202	0.2982	0.2308	0.1824	0.127	0.08	0.054			107	107	107	107	107	107	107	107
157.5	0.4822	0.429	0.398	0.3958	0.357	0.3182	0.2982	0.2418	0.1854	0.131	0.084	0.056		1	1	1	1	1	1	1	1	1	1	1	1			0.4822	0.429	0.398	0.3958	0.357	0.3182	0.2982	0.2418	0.1854	0.131	0.084	0.056			108	108	108	108	108	108	108	108
159	0.4932	0.438	0.412	0.3988	0.366	0.3292	0.2962	0.2438	0.1924	0.137	0.088	0.059		1	1	1	1	1	1	1	1	1	1	1	1			0.4932	0.438	0.412	0.3988	0.366	0.3292	0.2962	0.2438	0.1924	0.137	0.088	0.059			109	109	109	109	109	109	109	109
160.5	0.4912	0.443	0.42	0.3898	0.375	0.3332	0.3052	0.2448	0.1924	0.14	0.091	0.062		1	1	1	1	1	1	1	1	1	1	1	1			0.4912	0.443	0.42	0.3898	0.375	0.3332	0.3052	0.2448	0.1924	0.14	0.091	0.062			110	110	110	110	110	110	110	110
162	0.4952	0.46	0.428	0.4088	0.383	0.3362	0.3122	0.2458	0.1994	0.146	0.094	0.064		1	1	1	1	1	1	1	1	1	1	1	1			0.4952	0.46	0.428	0.4088	0.383	0.3362	0.3122	0.2458	0.1994	0.146	0.094	0.064			111	111	111	111	111	111	111	111
163.5	0.5122	0.458	0.44	0.4068	0.384	0.3462	0.3122	0.2488	0.2054	0.149	0.097	0.068		1	1	1	1	1	1	1	1	1	1	1	1			0.5122	0.458	0.44	0.4068	0.384	0.3462	0.3122	0.2488	0.2054	0.149	0.097	0.068			112	112	112	112	112	112	112	112
165	0.5282	0.461	0.433	0.4118	0.388	0.3492	0.3222	0.2578	0.2094	0.152	0.101	0.071		1	1	1	1	1	1	1	1	1	1	1	1			0.5282	0.461	0.433	0.4118	0.388	0.3492	0.3222	0.2578	0.2094	0.152	0.101	0.071			113	113	113	113	113	113	113	113
166.5	0.5352	0.463	0.44	0.4248	0.4	0.3572	0.3272	0.2648	0.2134	0.159	0.103	0.074		1	1	1	1	1	1	1	1	1	1	1	1			0.5352	0.463	0.44	0.4248	0.4	0.3572	0.3272	0.2648	0.2134	0.159	0.103	0.074			114	114	114	114	114	114	114	114
168	0.5232	0.474	0.449	0.4278	0.396	0.3572	0.3362	0.2638	0.2154	0.161	0.107	0.077		1	1	1	1	1	1	1	1	1	1	1	1			0.5232	0.474	0.449	0.4278	0.396	0.3572	0.3362	0.2638	0.2154	0.161	0.107	0.077			115	115	115	115	115	115	115	115
169.5	0.5422	0.48	0.457	0.4308	0.409	0.3622	0.3392	0.2748	0.2194	0.166	0.114	0.08		1	1	1	1	1	1	1	1	1	1	1	1			0.5422	0.48	0.457	0.4308	0.409	0.3622	0.3392	0.2748	0.2194	0.166	0.114	0.08			116	116	116	116	116	116	116	116
171	0.5462	0.477	0.469	0.4348	0.415	0.3642	0.3432	0.2778	0.2254	0.171	0.114	0.083		1	1	1	1	1	1	1	1	1	1	1	1			0.5462	0.477	0.469	0.4348	0.415	0.3642	0.3432	0.2778	0.2254	0.171	0.114	0.083			117	117	117	117	117	117	117	117
172.5	0.5532	0.494	0.468	0.4388	0.412	0.3622	0.3512	0.2758	0.2324	0.176	0.118	0.086		1	1	1	1	1	1	1	1	1	1	1	1			0.5532	0.494	0.468	0.4388	0.412	0.3622	0.3512	0.2758	0.2324	0.176	0.118	0.086			118	118	118	118	118	118	118	118
174	0.5622	0.502	0.471	0.4448	0.415	0.3732	0.3532	0.2758	0.2354	0.178	0.122	0.089		1	1	1	1	1	1	1	1	1	1	1	1			0.5622	0.502	0.471	0.4448	0.415	0.3732	0.3532	0.2758	0.2354	0.178	0.122	0.089			119	119	119	119	119	119	119	119
175.5	0.5672	0.504	0.479	0.4568	0.424	0.3722	0.3592	0.2808	0.2344	0.183	0.126	0.092		1	1	1	1	1	1	1	1	1	1	1	1			0.5672	0.504	0.479	0.4568	0.424	0.3722	0.3592	0.2808	0.2344	0.183	0.126	0.092			120	120	120	120	120	120	120	120
177	0.5642	0.504	0.484	0.4548	0.43	0.3822	0.3612	0.2828	0.2394	0.185	0.129	0.095		1	1	1	1	1	1	1	1	1	1	1	1			0.5642	0.504	0.484	0.4548	0.43	0.3822	0.3612	0.2828	0.2394	0.185	0.129	0.095			121	121	121	121	121	121	121	121
178.5	0.5612	0.518	0.49	0.4718	0.433	0.3902	0.3652	0.2918	0.2394	0.191	0.132	0.096		1	1	1	1	1	1	1	1	1	1	1	1			0.5612	0.518	0.49	0.4718	0.433	0.3902	0.3652	0.2918	0.2394	0.191	0.132	0.096			122	122	122	122	122	122	122	122
180	0.5682	0.524	0.488	0.4728	0.44	0.3872	0.3702	0.2978	0.2484	0.191	0.134	0.1		1	1	1	1	1	1	1	1	1	1	1	1			0.5682	0.524	0.488	0.4728	0.44	0.3872	0.3702	0.2978	0.2484	0.191	0.134	0.1			123	123	123	123	123	123	123	123
181.5	0.5812	0.539	0.49	0.4708	0.439	0.3982	0.3652	0.3028	0.2474	0.196	0.138	0.103		1	1	1	1	1	1	1	1	1	1	1	1			0.5812	0.539	0.49	0.4708	0.439	0.3982	0.3652	0.3028	0.2474	0.196	0.138	0.103			124	124	124	124	124	124	124	124
183	0.5882	0.536	0.505	0.4708	0.441	0.3992	0.3812	0.2938	0.2534	0.196	0.141	0.105		1	1	1	1	1	1	1	1	1	1	1	1			0.5882	0.536	0.505	0.4708	0.441	0.3992	0.3812	0.2938	0.2534	0.196	0.141	0.105			125	125	125	125	125	125	125	125
184.5	0.5792	0.538	0.519	0.4828	0.449	0.4022	0.3852	0.3028	0.2554	0.201	0.143	0.11		1	1	1	1	1	1	1	1	1	1	1	1			0.5792	0.538	0.519	0.4828	0.449	0.4022	0.3852	0.3028	0.2554	0.201	0.143	0.11			126	126	126	126	126	126	126	126
186	0.5922	0.537	0.521	0.4838	0.459	0.4022	0.3942	0.3138	0.2584	0.202	0.146	0.112		1	1	1	1	1	1	1	1	1	1	1	1			0.5922	0.537	0.521	0.4838	0.459	0.4022	0.3942	0.3138	0.2584	0.202	0.146	0.112			127	127	127	127	127	127	127	127
187.5	0.5942	0.546	0.521	0.4848	0.466	0.4062	0.3892	0.3178	0.2584	0.201	0.149	0.115		1	1	1	1	1	1	1	1	1	1	1	1			0.5942	0.546	0.521	0.4848	0.466	0.4062	0.3892	0.3178	0.2584	0.201	0.149	0.115			128	128	128	128	128	128	128	128
189	0.5962	0.552	0.529	0.4878	0.47	0.4102	0.3912	0.3258	0.2634	0.212	0.154	0.116		1	1	1	1	1	1	1	1	1	1	1	1			0.5962	0.552	0.529	0.4878	0.47	0.4102	0.3912	0.3258	0.2634	0.212	0.154	0.116			129	129	129	129	129	129	129	129
190.5	0.5982	0.564	0.532	0.4948	0.468	0.4172	0.3942	0.3268	0.2684	0.217	0.154	0.12		1	1	1	1	1	1	1	1	1	1	1	1			0.5982	0.564	0.532	0.4948	0.468	0.4172	0.3942	0.3268	0.2684	0.217	0.154	0.12			130	130	130	130	130	130	130	130
192	0.5852	0.568	0.537	0.4958	0.478	0.4222	0.3922	0.3258	0.2694	0.218	0.158	0.122		1	1	1	1	1	1	1	1	1	1	1	1			0.5852	0.568	0.537	0.4958	0.478	0.4222	0.3922	0.3258	0.2694	0.218	0.158	0.122			131	131	131	131	131	131	131	131
193.5	0.6042	0.571	0.522	0.4998	0.48	0.4332	0.4002	0.3258	0.2764	0.22	0.163	0.126		1	1	1	1	1	1	1	1	1	1	1	1			0.6042	0.571	0.522	0.4998	0.48	0.4332	0.4002	0.3258	0.2764	0.22	0.163	0.126			132	132	132	132	132	132	132	132
195	0.6112	0.576	0.546	0.4988	0.479	0.4302	0.4052	0.3368	0.2824	0.224	0.167	0.128		1	1	1	1	1	1	1	1	1	1	1	1			0.6112	0.576	0.546	0.4988	0.479	0.4302	0.4052	0.3368	0.2824	0.224	0.167	0.128			133	133	133	133	133	133	133	133
196.5	0.6382	0.576	0.56	0.5098	0.476	0.4382	0.4182	0.3348	0.2784	0.226	0.169	0.13		1	1	1	1	1	1	1	1	1	1	1	1			0.6382	0.576	0.56	0.5098	0.476	0.4382	0.4182	0.3348	0.2784	0.226	0.169	0.13			134	134	134	134	134	134	134	134
198	0.6312	0.575	0.552	0.5138	0.485	0.4412	0.4212	0.3418	0.2794	0.229	0.172	0.134		1	1	1	1	1	1	1	1	1	1	1	1			0.6312	0.575	0.552	0.5138	0.485	0.4412	0.4212	0.3418	0.2794	0.229	0.172	0.134			135	135	135	135	135	135	135	135
199.5	0.6282	0.589	0.561	0.5118	0.496	0.4432	0.4232	0.3548	0.2884	0.232	0.175	0.135		1	1	1	1	1	1	1	1	1	1	1	1			0.6282	0.589	0.561	0.5118	0.496	0.4432	0.4232	0.3548	0.2884	0.232	0.175	0.135			136	136	136	136	136	136	136	136
201	0.6402	0.588	0.561	0.5238	0.503	0.4532	0.4292	0.3518	0.2914	0.235	0.177	0.139		1	1	1	1	1	1	1	1	1	1	1	1			0.6402	0.588	0.561	0.5238	0.503	0.4532	0.4292	0.3518	0.2914	0.235	0.177	0.139			137	137	137	137	137	137	137	137
202.5	0.6472	0.587	0.572	0.5338	0.494	0.4542	0.4342	0.3548	0.2994	0.241	0.177	0.139		1	1	1	1	1	1	1	1	1	1	1	1			0.6472	0.587	0.572	0.5338	0.494	0.4542	0.4342	0.3548	0.2994	0.241	0.177	0.139			138	138	138	138	138	138	138	138
204	0.6572	0.598	0.569	0.5368	0.493	0.4672	0.4352	0.3538	0.2954	0.246	0.18	0.142		1	1	1	1	1	1	1	1	1	1	1	1			0.6572	0.598	0.569	0.5368	0.493	0.4672	0.4352	0.3538	0.2954	0.246	0.18	0.142			139	139	139	139	139	139	139	139
205.5	0.6642	0.604	0.575	0.5478	0.509	0.4632	0.4382	0.3588	0.2954	0.243	0.184	0.145		1	1	1	1	1	1	1	1	1	1	1	1			0.6642	0.604	0.575	0.5478	0.509	0.4632	0.4382	0.3588	0.2954	0.243	0.184	0.145			140	140	140	140	140	140	140	140
207	0.6582	0.601	0.578	0.5478	0.515	0.4752	0.4442	0.3598	0.2994	0.245	0.187	0.147		1	1	1	1	1	1	1	1	1	1	1	1			0.6582	0.601	0.578	0.5478	0.515	0.4752	0.4442	0.3598	0.2994	0.245	0.187	0.147			141	141	141	141	141	141	141	141
208.5	0.6622	0.606	0.584	0.5548	0.512	0.4832	0.4452	0.3648	0.3064	0.247	0.184	0.149		1	1	1	1	1	1	1	1	1	1	1	1			0.6622	0.606	0.584	0.5548	0.512	0.4832	0.4452	0.3648	0.3064	0.247	0.184	0.149			142	142	142	142	142	142	142	142
210	0.6642	0.615	0.588	0.5608	0.519	0.4822	0.4422	0.3608	0.3054	0.252	0.192	0.154		1	1	1	1	1	1	1	1	1	1	1	1			0.6642	0.615	0.588	0.5608	0.519	0.4822	0.4422	0.3608	0.3054	0.252	0.192	0.154			143	143	143	143	143	143	143	143
211.5	0.6632	0.614	0.602	0.5598	0.522	0.4782	0.4532	0.3678	0.3074	0.256	0.189	0.158		1	1	1	1	1	1	1	1	1	1	1	1			0.6632	0.614	0.602	0.5598	0.522	0.4782	0.4532	0.3678	0.3074	0.256	0.189	0.158			144	144	144	144	144	144	144	144
213	0.6652	0.616	0.601	0.5618	0.531	0.4882	0.4512	0.3728	0.3154	0.257	0.197	0.16		1	1	1	1	1	1	1	1	1	1	1	1			0.6652	0.616	0.601	0.5618	0.531	0.4882	0.4512	0.3728	0.3154	0.257	0.197	0.16			145	145	145	145	145	145	145	145
214.5	0.6722	0.62	0.602	0.5608	0.535	0.4932	0.4602	0.3788	0.3234	0.263	0.199	0.16		1	1	1	1	1	1	1	1	1	1	1	1			0.6722	0.62	0.602	0.5608	0.535	0.4932	0.4602	0.3788	0.3234	0.263	0.199	0.16			146	146	146	146	146	146	146	146
216	0.6852	0.622	0.621	0.5778	0.539	0.5012	0.4542	0.3878	0.3184	0.26	0.2	0.163		1	1	1	1	1	1	1	1	1	1	1	1			0.6852	0.622	0.621	0.5778	0.539	0.5012	0.4542	0.3878	0.3184	0.26	0.2	0.163			147	147	147	147	147	147	147	147
217.5	0.6892	0.637	0.609	0.5818	0.542	0.5032	0.4592	0.3808	0.3244	0.268	0.205	0.167		1	1	1	1	1	1	1	1	1	1	1	1			0.6892	0.637	0.609	0.5818	0.542	0.5032	0.4592	0.3808	0.3244	0.268	0.205	0.167			148	148	148	148	148	148	148	148
219	0.6932	0.647	0.618	0.5768	0.549	0.5082	0.4752	0.3958	0.3254	0.269	0.21	0.169		1	1	1	1	1	1	1	1	1	1	1	1			0.6932	0.647	0.618	0.5768	0.549	0.5082	0.4752	0.3958	0.3254	0.269	0.21	0.169			149	149	149	149	149	149	149	149
220.5	0.6922	0.65	0.621	0.5778	0.551	0.5062	0.4802	0.4038	0.3244	0.269	0.207	0.169		1	1	1	1	1	1	1	1	1	1	1	1			0.6922	0.65	0.621	0.5778	0.551	0.5062	0.4802	0.4038	0.3244	0.269	0.207	0.169			150	150	150	150	150	150	150	150
222	0.7022	0.657	0.632	0.5868	0.554	0.5112	0.4802	0.4088	0.3334	0.278	0.211	0.172		1	1	1	1	1	1	1	1	1	1	1	1			0.7022	0.657	0.632	0.5868	0.554	0.5112	0.4802	0.4088	0.3334	0.278	0.211	0.172			151	151	151	151	151	151	151	151
223.5	0.7002	0.658	0.63	0.5958	0.545	0.5132	0.4782	0.4088	0.3414	0.276	0.212	0.173		1	1	1	1	1	1	1	1	1	1	1	1			0.7002	0.658	0.63	0.5958	0.545	0.5132	0.4782	0.4088	0.3414	0.276	0.212	0.173			152	152	152	152	152	152	152	152
225	0.7082	0.652	0.642	0.5958	0.55	0.5152	0.4792	0.4138	0.3444	0.276	0.211	0.172		1	1	1	1	1	1	1	1	1	1	1	1			0.7082	0.652	0.642	0.5958	0.55	0.5152	0.4792	0.4138	0.3444	0.276	0.211	0.172			153	153	153	153	153	153	153	153
226.5	0.7162	0.665	0.636	0.6008	0.555	0.5202	0.4872	0.4118	0.3464	0.271	0.216	0.176		1	1	1	1	1	1	1	1	1	1	1	1			0.7162	0.665	0.636	0.6008	0.555	0.5202	0.4872	0.4118	0.3464	0.271	0.216	0.176			154	154	154	154	154	154	154	154
228	0.7272	0.674	0.639	0.6068	0.562	0.5272	0.4902	0.4048	0.3414	0.28	0.22	0.183		1	1	1	1	1	1	1	1	1	1	1	1			0.7272	0.674	0.639	0.6068	0.562	0.5272	0.4902	0.4048	0.3414	0.28	0.22	0.183			155	155	155	155	155	155	155	155
229.5	0.7212	0.666	0.656	0.6088	0.559	0.5282	0.4892	0.4178	0.3524	0.283	0.223	0.181		1	1	1	1	1	1	1	1	1	1	1	1			0.7212	0.666	0.656	0.6088	0.559	0.5282	0.4892	0.4178	0.3524	0.283	0.223	0.181			156	156	156	156	156	156	156	156
231	0.7242	0.669	0.655	0.6138	0.569	0.5302	0.4982	0.4238	0.3524	0.284	0.226	0.184		1	1	1	1	1	1	1	1	1	1	1	1			0.7242	0.669	0.655	0.6138	0.569	0.5302	0.4982	0.4238	0.3524	0.284	0.226	0.184			157	157	157	157	157	157	157	157
232.5	0.7162	0.664	0.652	0.6118	0.575	0.5392	0.5052	0.4168	0.3534	0.288	0.226	0.189		1	1	1	1	1	1	1	1	1	1	1	1			0.7162	0.664	0.652	0.6118	0.575	0.5392	0.5052	0.4168	0.3534	0.288	0.226	0.189			158	158	158	158	158	158	158	158
234	0.7262	0.673	0.66	0.6198	0.58	0.5402	0.5062	0.4108	0.3474	0.284	0.227	0.19		1	1	1	1	1	1	1	1	1	1	1	1			0.7262	0.673	0.66	0.6198	0.58	0.5402	0.5062	0.4108	0.3474	0.284	0.227	0.19			159	159	159	159	159	159	159	159
235.5	0.7342	0.679	0.667	0.6208	0.586	0.5392	0.5072	0.4198	0.3604	0.294	0.231	0.191		1	1	1	1	1	1	1	1	1	1	1	1			0.7342	0.679	0.667	0.6208	0.586	0.5392	0.5072	0.4198	0.3604	0.294	0.231	0.191			160	160	160	160	160	160	160	160
237	0.7392	0.685	0.67	0.6258	0.586	0.5372	0.5102	0.4198	0.3624	0.293	0.235	0.194		1	1	1	1	1	1	1	1	1	1	1	1			0.7392	0.685	0.67	0.6258	0.586	0.5372	0.5102	0.4198	0.3624	0.293	0.235	0.194			161	161	161	161	161	161	161	161
238.5	0.7442	0.683	0.667	0.6298	0.584	0.5462	0.5162	0.4278	0.3664	0.298	0.234	0.192		1	1	1	1	1	1	1	1	1	1	1	1			0.7442	0.683	0.667	0.6298	0.584	0.5462	0.5162	0.4278	0.3664	0.298	0.234	0.192			162	162	162	162	162	162	162	162
240	0.7442	0.686	0.673	0.6318	0.588	0.5532	0.5262	0.4308	0.3614	0.293	0.235	0.198		1	1	1	1	1	1	1	1	1	1	1	1			0.7442	0.686	0.673	0.6318	0.588	0.5532	0.5262	0.4308	0.3614	0.293	0.235	0.198			163	163	163	163	163	163	163	163
241.5	0.7442	0.686	0.681	0.6438	0.597	0.5562	0.5242	0.4398	0.3634	0.298	0.232	0.195		1	1	1	1	1	1	1	1	1	1	1	1			0.7442	0.686	0.681	0.6438	0.597	0.5562	0.5242	0.4398	0.3634	0.298	0.232	0.195			164	164	164	164	164	164	164	164
243	0.7522	0.698	0.681	0.6458	0.603	0.5512	0.5302	0.4418	0.3754	0.302	0.239	0.197		1	1	1	1	1	1	1	1	1	1	1	1			0.7522	0.698	0.681	0.6458	0.603	0.5512	0.5302	0.4418	0.3754	0.302	0.239	0.197			165	165	165	165	165	165	165	165
244.5	0.7532	0.692	0.686	0.6488	0.602	0.5532	0.5382	0.4438	0.3804	0.302	0.246	0.201		1	1	1	1	1	1	1	1	1	1	1	1			0.7532	0.692	0.686	0.6488	0.602	0.5532	0.5382	0.4438	0.3804	0.302	0.246	0.201			166	166	166	166	166	166	166	166
246	0.7562	0.695	0.688	0.6498	0.606	0.5632	0.5402	0.4498	0.3834	0.301	0.242	0.202		1	1	1	1	1	1	1	1	1	1	1	1			0.7562	0.695	0.688	0.6498	0.606	0.5632	0.5402	0.4498	0.3834	0.301	0.242	0.202			167	167	167	167	167	167	167	167
247.5	0.7632	0.706	0.691	0.6518	0.605	0.5642	0.5382	0.4468	0.3774	0.307	0.246	0.206		1	1	1	1	1	1	1	1	1	1	1	1			0.7632	0.706	0.691	0.6518	0.605	0.5642	0.5382	0.4468	0.3774	0.307	0.246	0.206			168	168	168	168	168	168	168	168
249	0.7662	0.706	0.692	0.6538	0.615	0.5672	0.5362	0.4538	0.3874	0.316	0.245	0.204		1	1	1	1	1	1	1	1	1	1	1	1			0.7662	0.706	0.692	0.6538	0.615	0.5672	0.5362	0.4538	0.3874	0.316	0.245	0.204			169	169	169	169	169	169	169	169
250.5	0.7702	0.706	0.7	0.6538	0.616	0.5722	0.5482	0.4598	0.3934	0.315	0.253	0.209		1	1	1	1	1	1	1	1	1	1	1	1			0.7702	0.706	0.7	0.6538	0.616	0.5722	0.5482	0.4598	0.3934	0.315	0.253	0.209			170	170	170	170	170	170	170	170
252	0.7672	0.704	0.7	0.6578	0.613	0.5762	0.5502	0.4668	0.3864	0.312	0.251	0.21		1	1	1	1	1	1	1	1	1	1	1	1			0.7672	0.704	0.7	0.6578	0.613	0.5762	0.5502	0.4668	0.3864	0.312	0.251	0.21			171	171	171	171	171	171	171	171
253.5	0.7722	0.716	0.705	0.6628	0.619	0.5782	0.5432	0.4628	0.3864	0.314	0.252	0.218		1	1	1	1	1	1	1	1	1	1	1	1			0.7722	0.716	0.705	0.6628	0.619	0.5782	0.5432	0.4628	0.3864	0.314	0.252	0.218			172	172	172	172	172	172	172	172
255	0.7772	0.716	0.705	0.6648	0.619	0.5832	0.5442	0.4738	0.3904	0.313	0.253	0.219		1	1	1	1	1	1	1	1	1	1	1	1			0.7772	0.716	0.705	0.6648	0.619	0.5832	0.5442	0.4738	0.3904	0.313	0.253	0.219			173	173	173	173	173	173	173	173
256.5	0.7732	0.717	0.704	0.6668	0.627	0.5862	0.5582	0.4738	0.3954	0.312	0.249	0.214		1	1	1	1	1	1	1	1	1	1	1	1			0.7732	0.717	0.704	0.6668	0.627	0.5862	0.5582	0.4738	0.3954	0.312	0.249	0.214			174	174	174	174	174	174	174	174
258	0.7752	0.72	0.708	0.6698	0.637	0.5832	0.5592	0.4718	0.3984	0.328	0.257	0.218		1	1	1	1	1	1	1	1	1	1	1	1			0.7752	0.72	0.708	0.6698	0.637	0.5832	0.5592	0.4718	0.3984	0.328	0.257	0.218			175	175	175	175	175	175	175	175
259.5	0.7792	0.725	0.715	0.6728	0.636	0.5932	0.5572	0.4738	0.3974	0.327	0.258	0.225		1	1	1	1	1	1	1	1	1	1	1	1			0.7792	0.725	0.715	0.6728	0.636	0.5932	0.5572	0.4738	0.3974	0.327	0.258	0.225			176	176	176	176	176	176	176	176
261	0.7792	0.733	0.714	0.6748	0.633	0.5942	0.5572	0.4808	0.4044	0.327	0.261	0.223		1	1	1	1	1	1	1	1	1	1	1	1			0.7792	0.733	0.714	0.6748	0.633	0.5942	0.5572	0.4808	0.4044	0.327	0.261	0.223			177	177	177	177	177	177	177	177
262.5	0.7832	0.732	0.718	0.6798	0.636	0.5962	0.5622	0.4828	0.4044	0.325	0.265	0.222		1	1	1	1	1	1	1	1	1	1	1	1			0.7832	0.732	0.718	0.6798	0.636	0.5962	0.5622	0.4828	0.4044	0.325	0.265	0.222			178	178	178	178	178	178	178	178
264	0.7832	0.727	0.72	0.6768	0.64	0.5972	0.5682	0.4778	0.4064	0.332	0.263	0.228		1	1	1	1	1	1	1	1	1	1	1	1			0.7832	0.727	0.72	0.6768	0.64	0.5972	0.5682	0.4778	0.4064	0.332	0.263	0.228			179	179	179	179	179	179	179	179
265.5	0.7872	0.735	0.72	0.6808	0.64	0.5932	0.5682	0.4838	0.4084	0.338	0.27	0.225		1	1	1	1	1	1	1	1	1	1	1	1			0.7872	0.735	0.72	0.6808	0.64	0.5932	0.5682	0.4838	0.4084	0.338	0.27	0.225			180	180	180	180	180	180	180	180
267	0.7882	0.74	0.726	0.6828	0.639	0.5982	0.5682	0.4898	0.4144	0.338	0.269	0.228		1	1	1	1	1	1	1	1	1	1	1	1			0.7882	0.74	0.726	0.6828	0.639	0.5982	0.5682	0.4898	0.4144	0.338	0.269	0.228			181	181	181	181	181	181	181	181
268.5	0.7922	0.734	0.725	0.6818	0.644	0.6072	0.5732	0.4928	0.4104	0.336	0.272	0.23		1	1	1	1	1	1	1	1	1	1	1	1			0.7922	0.734	0.725	0.6818	0.644	0.6072	0.5732	0.4928	0.4104	0.336	0.272	0.23			182	182	182	182	182	182	182	182
270	0.7932	0.737	0.73	0.6828	0.643	0.6032	0.5782	0.4998	0.4184	0.341	0.271	0.227		1	1	1	1	1	1	1	1	1	1	1	1			0.7932	0.737	0.73	0.6828	0.643	0.6032	0.5782	0.4998	0.4184	0.341	0.271	0.227			183	183	183	183	183	183	183	183
[truncated: 54 more columns]

## Sheet: W42Q_glycerol_2
	2020-07-14 W42Q 40 PIPES 10 mM pH 6.7 NaCl 150 mM glycerol, X mM													2020-07-14 W42Q 40 PIPES 10 mM pH 6.7 NaCl 150 mM glycerol, X mM														2020-07-14 W42Q 40 PIPES 10 mM pH 6.7 NaCl 150 mM glycerol, X mM														2020-07-14 W42Q 40 PIPES 10 mM pH 6.7 NaCl 150 mM glycerol, X mM
	0	10	20	30	40	60	80	110	140	180	220	270		0	10	20	30	40	60	80	110	140	180	220	270			0	10	20	30	40	60	80	110	140	180	220	270			0	10	20	30	40	60	80	110
0	-0.0008	0.0004	-0.0004	0	0.0002	-0.0002	-0.0006	-0.0006	-0.0006	0.0002	-0.0002	-0.0002		0	0	0	0	0	0	0	0	0	0	0	0			0	0	0	0	0	0	0	0	0	0	0	0			0	0	0	0	0	0	0	0
1.5	0.0002	-0.0006	0.0006	0	0.0002	0.0008	0.0014	0.0004	0.0004	0.0002	0.0008	0.0008		0	0	0	0	0	0	0	0	0	0	0	0			0	0	0	0	0	0	0	0	0	0	0	0			0	0	0	0	0	0	0	0
3	0.0002	0.0004	-0.0004	-0.001	-0.0008	-0.0002	-0.0006	-0.0006	-0.0006	0.0002	-0.0002	-0.0002		0	0	0	0	0	0	0	0	0	0	0	0			0	0	0	0	0	0	0	0	0	0	0	0			0	0	0	0	0	0	0	0
4.5	0.0002	0.0004	-0.0004	0	0.0002	-0.0002	0.0004	0.0004	0.0004	0.0002	-0.0002	-0.0002		0	0	0	0	0	0	0	0	0	0	0	0			0	0	0	0	0	0	0	0	0	0	0	0			0	0	0	0	0	0	0	0
6	0.0002	-0.0006	0.0006	0.001	0.0002	-0.0002	-0.0006	0.0004	0.0004	-0.0008	-0.0002	-0.0002		0	0	0	0	0	0	0	0	0	0	0	0			0	0	0	0	0	0	0	0	0	0	0	0			0	0	0	0	0	0	0	0
7.5	-0.0018	0.0004	-0.0004	0	-0.0008	-0.0002	-0.0006	0.0004	-0.0016	-0.0008	-0.0002	-0.0002		0	0	0	0	0	0	0	0	0	0	0	0			0	0	0	0	0	0	0	0	0	0	0	0			0	0	0	0	0	0	0	0
9	0.0002	0.0004	0.0006	0.001	0.0002	-0.0002	-0.0006	0.0004	0.0004	0.0002	0.0008	0.0008		0	0	0	0	0	0	0	0	0	0	0	0			0	0	0	0	0	0	0	0	0	0	0	0			0	0	0	0	0	0	0	0
10.5	0.0002	0.0014	0.0006	0	0.0002	0.0008	0.0004	0.0004	-0.0006	0.0002	0.0008	0.0018		0	0	0	0	0	0	0	0	0	0	0	0			0	0	0	0	0	0	0	0	0	0	0	0			0	0	0	0	0	0	0	0
12	-0.0008	0.0004	-0.0004	0	-0.0008	0.0008	0.0004	0.0004	-0.0006	0.0002	0.0008	-0.0002		0	0	0	0	0	0	0	0	0	0	0	0			0	0	0	0	0	0	0	0	0	0	0	0			0	0	0	0	0	0	0	0
13.5	-0.0008	0.0004	-0.0004	0.001	-0.0008	-0.0002	-0.0006	-0.0006	0.0004	0.0002	-0.0002	0.0008		0	0	0	0	0	0	0	0	0	0	0	0			0	0	0	0	0	0	0	0	0	0	0	0			0	0	0	0	0	0	0	0
15	-0.0008	0.0004	-0.0004	0.001	-0.0008	-0.0002	0.0004	-0.0006	-0.0006	-0.0008	0.0008	-0.0002		0	0	0	0	0	0	0	0	0	0	0	0			0	0	0	0	0	0	0	0	0	0	0	0			0	0	0	0	0	0	0	0
16.5	-0.0008	0.0004	-0.0004	0	-0.0008	-0.0002	-0.0006	0.0004	-0.0006	-0.0018	0.0008	-0.0002		0	0	0	0	0	0	0	0	0	0	0	0			0	0	0	0	0	0	0	0	0	0	0	0			0	0	0	0	0	0	0	0
18	0.0002	0.0004	-0.0004	0	0.0002	0.0008	-0.0006	0.0004	-0.0006	0.0002	0.0008	0.0008		0	0	0	0	0	0	0	0	0	0	0	0			0	0	0	0	0	0	0	0	0	0	0	0			0	0	0	0	0	0	0	0
19.5	0.0002	0.0004	-0.0004	0	-0.0008	0.0008	0.0004	0.0004	0.0004	-0.0008	0.0008	-0.0002		0	0	0	0	0	0	0	0	0	0	0	0			0	0	0	0	0	0	0	0	0	0	0	0			0	0	0	0	0	0	0	0
21	-0.0008	0.0014	0.0006	0.001	0.0002	0.0008	0.0004	0.0004	-0.0006	0.0002	0.0008	0.0008		0	0	0	0	0	0	0	0	0	0	0	0			0	0	0	0	0	0	0	0	0	0	0	0			0	0	0	0	0	0	0	0
22.5	0.0002	0.0004	0.0016	0.002	0.0002	0.0008	0.0004	0.0014	0.0004	0.0002	0.0008	0.0008		0	0	0	0	0	0	0	0	0	0	0	0			0	0	0	0	0	0	0	0	0	0	0	0			0	0	0	0	0	0	0	0
24	0.0002	0.0024	-0.0004	0.001	0.0002	0.0008	0.0004	0.0014	0.0004	0.0002	0.0008	-0.0002		0	0	0	0	0	0	0	0	0	0	0	0			0	0	0	0	0	0	0	0	0	0	0	0			0	0	0	0	0	0	0	0
25.5	0.0012	0.0014	0.0016	0.002	0.0002	0.0018	0.0004	0.0014	0.0004	0.0012	0.0008	0.0008		0	0	0	0	0	0	0	0	0	0	0	0			0	0	0	0	0	0	0	0	0	0	0	0			0	0	0	0	0	0	0	0
27	-0.0008	0.0004	0.0006	0.001	-0.0008	0.0008	0.0004	0.0004	-0.0006	0.0002	0.0008	-0.0002		0	0	0	0	0	0	0	0	0	0	0	0			0	0	0	0	0	0	0	0	0	0	0	0			0	0	0	0	0	0	0	0
28.5	0.0012	0.0014	0.0006	0.001	0.0012	0.0018	0.0004	0.0014	0.0004	0.0002	0.0008	0.0008		0	0	0	0	0	0	0	0	0	0	0	0			0	0	0	0	0	0	0	0	0	0	0	0			0	0	0	0	0	0	0	0
30	0.0012	0.0014	0.0016	0.001	0.0012	0.0018	0.0004	0.0014	0.0004	0.0012	0.0008	-0.0002		0	0	0	0	0	0	0	0	0	0	0	0			0	0	0	0	0	0	0	0	0	0	0	0			0	0	0	0	0	0	0	0
31.5	0.0002	0.0014	0.0006	0.001	0.0002	0.0018	0.0004	0.0014	0.0004	0.0002	0.0008	0.0008		0	0	0	0	0	0	0	0	0	0	0	0			0	0	0	0	0	0	0	0	0	0	0	0			0	0	0	0	0	0	0	0
33	0.0012	0.0024	0.0016	0.002	0.0022	0.0028	0.0014	0.0024	0.0014	0.0012	0.0028	0.0008		0	0	0	0	0	0	0	0	0	0	0	0			0	0	0	0	0	0	0	0	0	0	0	0			0	0	0	0	0	0	0	0
34.5	0.0002	0.0004	0.0006	0.001	0.0002	0.0018	0.0004	0.0004	0.0004	0.0002	0.0008	-0.0002		0	0	0	0	0	0	0	0	0	0	0	0			0	0	0	0	0	0	0	0	0	0	0	0			0	0	0	0	0	0	0	0
36	0.0012	0.0014	0.0006	0.002	0.0012	0.0028	0.0004	0.0024	0.0014	0.0002	0.0018	0.0018		0	0	0	0	0	0	0	0	0	0	0	0			0	0	0	0	0	0	0	0	0	0	0	0			0	0	0	0	0	0	0	0
37.5	-0.0008	0.0014	0.0006	0.002	-0.0008	0.0018	0.0004	0.0004	0.0004	0.0002	-0.0002	-0.0002		0	0	0	0	0	0	0	0	0	0	0	0			0	0	0	0	0	0	0	0	0	0	0	0			0	0	0	0	0	0	0	0
39	0.0002	0.0004	0.0006	0.002	0.0012	0.0018	0.0004	0.0004	0.0004	0.0002	0.0008	0.0008		0	0	0	0	0	0	0	0	0	0	0	0			0	0	0	0	0	0	0	0	0	0	0	0			0	0	0	0	0	0	0	0
40.5	0.0012	0.0024	0.0016	0.003	0.0012	0.0038	0.0024	0.0024	0.0024	0.0012	0.0018	0.0018		0	0	0	0	0	0	0	0	0	0	0	0			0	0	0	0	0	0	0	0	0	0	0	0			0	0	0	0	0	0	0	0
42	0.0002	0.0024	0.0006	0.002	0.0012	0.0038	0.0014	0.0014	0.0004	0.0012	0.0008	-0.0002		0	0	0	0	0	0	0	0	0	0	0	0			0	0	0	0	0	0	0	0	0	0	0	0			0	0	0	0	0	0	0	0
43.5	0.0012	0.0024	0.0026	0.002	0.0012	0.0028	0.0024	0.0024	0.0014	0.0012	0.0018	0.0018		0	0	0	0	0	0	0	0	0	0	0	0			0	0	0	0	0	0	0	0	0	0	0	0			0	0	0	0	0	0	0	0
45	0.0012	0.0014	0.0026	0.003	0.0012	0.0038	0.0014	0.0014	0.0014	0.0012	0.0018	0.0018		0	0	0	0	0	0	0	0	0	0	0	0			0	0	0	0	0	0	0	0	0	0	0	0			0	0	0	0	0	0	0	0
46.5	0.0012	0.0014	0.0016	0.002	0.0012	0.0038	0.0014	0.0014	0.0014	0.0002	0.0018	0.0018		0	0	0	0	0	0	0	0	0	0	0	0			0	0	0	0	0	0	0	0	0	0	0	0			0	0	0	0	0	0	0	0
48	0.0012	0.0024	0.0016	0.002	0.0012	0.0038	0.0014	0.0014	0.0004	0.0012	0.0018	0.0018		0	0	0	0	0	0	0	0	0	0	0	0			0	0	0	0	0	0	0	0	0	0	0	0			0	0	0	0	0	0	0	0
49.5	0.0012	0.0024	0.0016	0.002	0.0012	0.0038	0.0014	0.0014	0.0004	0.0002	0.0018	0.0008		0	0	0	0	0	0	0	0	0	0	0	0			0	0	0	0	0	0	0	0	0	0	0	0			0	0	0	0	0	0	0	0
51	0.0012	0.0024	0.0016	0.003	0.0012	0.0038	0.0014	0.0014	0.0014	0.0012	0.0008	0.0008		0	0	0	0	0	0	0	0	0	0	0	0			0	0	0	0	0	0	0	0	0	0	0	0			0	0	0	0	0	0	0	0
52.5	0.0012	0.0024	0.0016	0.003	0.0012	0.0038	0.0014	0.0014	0.0014	0.0012	0.0018	0.0008		0	0	0	0	0	0	0	0	0	0	0	0			0	0	0	0	0	0	0	0	0	0	0	0			0	0	0	0	0	0	0	0
54	0.0022	0.0024	0.0026	0.003	0.0022	0.0048	0.0024	0.0024	0.0014	0.0012	0.0028	0.0018		0	0	0	0	0	0	0	0	0	0	0	0			0	0	0	0	0	0	0	0	0	0	0	0			0	0	0	0	0	0	0	0
55.5	0.0022	0.0024	0.0026	0.003	0.0022	0.0038	0.0024	0.0024	0.0024	0.0012	0.0018	0.0018		0	0	0	0	0	0	0	0	0	0	0	0			0	0	0	0	0	0	0	0	0	0	0	0			0	0	0	0	0	0	0	0
57	0.0032	0.0034	0.0036	0.004	0.0032	0.0048	0.0024	0.0024	0.0024	0.0022	0.0028	0.0028		0	0	0	0	0	0	0	0	0	0	0	0			0	0	0	0	0	0	0	0	0	0	0	0			0	0	0	0	0	0	0	0
58.5	0.0022	0.0024	0.0026	0.003	0.0022	0.0048	0.0014	0.0024	0.0014	0.0012	0.0018	0.0018		0	0	0	0	0	0	0	0	0	0	0	0			0	0	0	0	0	0	0	0	0	0	0	0			0	0	0	0	0	0	0	0
60	0.0022	0.0024	0.0016	0.002	0.0022	0.0048	0.0014	0.0024	0.0004	0.0002	0.0008	0.0008		0	0	0	0	0	0	0	0	0	0	0	0			0	0	0	0	0	0	0	0	0	0	0	0			0	0	0	0	0	0	0	0
61.5	0.0032	0.0034	0.0026	0.004	0.0032	0.0058	0.0014	0.0014	0.0014	0.0022	0.0018	0.0018		0	0	0	0	0	0	0	0	0	0	0	0			0	0	0	0	0	0	0	0	0	0	0	0			0	0	0	0	0	0	0	0
63	0.0032	0.0024	0.0016	0.003	0.0022	0.0048	0.0014	0.0014	0.0014	0.0002	0.0018	0.0018		0	0	0	0	0	0	0	0	0	0	0	0			0	0	0	0	0	0	0	0	0	0	0	0			0	0	0	0	0	0	0	0
64.5	0.0052	0.0044	0.0036	0.005	0.0042	0.0058	0.0034	0.0034	0.0024	0.0032	0.0028	0.0028		0	0	0	0	0	0	0	0	0	0	0	0			0	0	0	0	0	0	0	0	0	0	0	0			0	0	0	0	0	0	0	0
66	0.0052	0.0054	0.0046	0.005	0.0042	0.0058	0.0034	0.0034	0.0034	0.0022	0.0028	0.0028		0	0	0	0	0	0	0	0	0	0	0	0			0	0	0	0	0	0	0	0	0	0	0	0			0	0	0	0	0	0	0	0
67.5	0.0052	0.0054	0.0046	0.005	0.0042	0.0058	0.0034	0.0034	0.0024	0.0022	0.0018	0.0018		0	0	0	0	0	0	0	0	0	0	0	0			0	0	0	0	0	0	0	0	0	0	0	0			0	0	0	0	0	0	0	0
69	0.0062	0.0064	0.0056	0.006	0.0062	0.0068	0.0044	0.0034	0.0034	0.0022	0.0028	0.0028		0	0	0	0	0	0	0	0	0	0	0	0			0	0	0	0	0	0	0	0	0	0	0	0			0	0	0	0	0	0	0	0
70.5	0.0072	0.0064	0.0056	0.006	0.0062	0.0068	0.0034	0.0044	0.0024	0.0022	0.0028	0.0018		0	0	0	0	0	0	0	0	0	0	0	0			0	0	0	0	0	0	0	0	0	0	0	0			0	0	0	0	0	0	0	0
72	0.0092	0.0084	0.0066	0.008	0.0072	0.0078	0.0044	0.0044	0.0034	0.0022	0.0028	0.0018		0	0	0	0	0	0	0	0	0	0	0	0			0	0	0	0	0	0	0	0	0	0	0	0			0	0	0	0	0	0	0	0
73.5	0.0122	0.0104	0.0096	0.01	0.0102	0.0098	0.0074	0.0054	0.0054	0.0042	0.0038	0.0048		0	0	0	0	0	0	0	0	0	0	0	0			0	0	0	0	0	0	0	0	0	0	0	0			0	0	0	0	0	0	0	0
75	0.0142	0.0114	0.0106	0.011	0.0122	0.0118	0.0084	0.0064	0.0064	0.0042	0.0048	0.0038		0	0	0	0	0	0	0	0	0	0	0	0			0	0	0	0	0	0	0	0	0	0	0	0			0	0	0	0	0	0	0	0
76.5	0.0172	0.0134	0.0116	0.012	0.0142	0.0128	0.0094	0.0074	0.0064	0.0042	0.0048	0.0048		0	0	0	0	0	0	0	0	0	0	0	0			0	0	0	0	0	0	0	0	0	0	0	0			0	0	0	0	0	0	0	0
78	0.0222	0.0164	0.0146	0.016	0.0162	0.0158	0.0114	0.0084	0.0074	0.0052	0.0048	0.0048		0	0	0	0	0	0	0	0	0	0	0	0			0	0	0	0	0	0	0	0	0	0	0	0			0	0	0	0	0	0	0	0
79.5	0.0272	0.0194	0.0186	0.019	0.0212	0.0178	0.0144	0.0114	0.0094	0.0072	0.0068	0.0058		0	0	0	0	0	0	0	0	0	0	0	0			0	0	0	0	0	0	0	0	0	0	0	0			0	0	0	0	0	0	0	0
81	0.0302	0.0234	0.0196	0.021	0.0262	0.0208	0.0164	0.0124	0.0114	0.0072	0.0058	0.0058		0	0	0	0	0	0	0	0	0	0	0	0			0	0	0	0	0	0	0	0	0	0	0	0			0	0	0	0	0	0	0	0
82.5	0.0352	0.0294	0.0246	0.025	0.0312	0.0248	0.0204	0.0154	0.0134	0.0092	0.0078	0.0078		0	0	0	0	0	0	0	0	0	0	0	0			0	0	0	0	0	0	0	0	0	0	0	0			0	0	0	0	0	0	0	0
84	0.0432	0.0334	0.0296	0.031	0.0362	0.0298	0.0244	0.0184	0.0164	0.0112	0.0098	0.0098		0	0	0	0	0	0	0	0	0	0	0	0			0	0	0	0	0	0	0	0	0	0	0	0			0	0	0	0	0	0	0	0
85.5	0.0502	0.0394	0.0386	0.038	0.0432	0.0358	0.0304	0.0234	0.0204	0.0132	0.0118	0.0108		1	0	0	0	0	0	0	0	0	0	0	0			0.0502	0	0	0	0	0	0	0	0	0	0	0			60	0	0	0	0	0	0	0
87	0.0572	0.0454	0.0436	0.044	0.0502	0.0398	0.0354	0.0274	0.0234	0.0162	0.0138	0.0138		1	1	0	0	1	0	0	0	0	0	0	0			0.0572	0.0454	0	0	0.0502	0	0	0	0	0	0	0			61	61	0	0	61	0	0	0
88.5	0.0632	0.0524	0.0476	0.049	0.0582	0.0458	0.0404	0.0324	0.0284	0.0192	0.0168	0.0168		1	1	1	1	1	1	0	0	0	0	0	0			0.0632	0.0524	0.0476	0.049	0.0582	0.0458	0	0	0	0	0	0			62	62	62	62	62	62	0	0
90	0.0742	0.0594	0.0556	0.056	0.0662	0.0528	0.0474	0.0374	0.0344	0.0222	0.0178	0.0188		1	1	1	1	1	1	1	0	0	0	0	0			0.0742	0.0594	0.0556	0.056	0.0662	0.0528	0.0474	0	0	0	0	0			63	63	63	63	63	63	63	0
91.5	0.0862	0.0694	0.0656	0.065	0.0772	0.0608	0.0554	0.0424	0.0384	0.0262	0.0228	0.0228		1	1	1	1	1	1	1	0	0	0	0	0			0.0862	0.0694	0.0656	0.065	0.0772	0.0608	0.0554	0	0	0	0	0			64	64	64	64	64	64	64	0
93	0.0932	0.0754	0.0696	0.075	0.0832	0.0708	0.0624	0.0474	0.0454	0.0302	0.0258	0.0258		1	1	1	1	1	1	1	1	1	0	0	0			0.0932	0.0754	0.0696	0.075	0.0832	0.0708	0.0624	0.0474	0.0454	0	0	0			65	65	65	65	65	65	65	65
94.5	0.0962	0.0864	0.0806	0.083	0.0922	0.0758	0.0704	0.0524	0.0494	0.0332	0.0308	0.0278		1	1	1	1	1	1	1	1	1	0	0	0			0.0962	0.0864	0.0806	0.083	0.0922	0.0758	0.0704	0.0524	0.0494	0	0	0			66	66	66	66	66	66	66	66
96	0.1092	0.0964	0.0906	0.092	0.1032	0.0838	0.0774	0.0584	0.0574	0.0392	0.0348	0.0328		1	1	1	1	1	1	1	1	1	0	0	0			0.1092	0.0964	0.0906	0.092	0.1032	0.0838	0.0774	0.0584	0.0574	0	0	0			67	67	67	67	67	67	67	67
97.5	0.1192	0.0994	0.0996	0.099	0.1132	0.0958	0.0844	0.0684	0.0664	0.0452	0.0398	0.0388		1	1	1	1	1	1	1	1	1	1	0	0			0.1192	0.0994	0.0996	0.099	0.1132	0.0958	0.0844	0.0684	0.0664	0.0452	0	0			68	68	68	68	68	68	68	68
99	0.1292	0.1134	0.1086	0.109	0.1212	0.1018	0.0904	0.0764	0.0714	0.0522	0.0438	0.0428		1	1	1	1	1	1	1	1	1	1	0	0			0.1292	0.1134	0.1086	0.109	0.1212	0.1018	0.0904	0.0764	0.0714	0.0522	0	0			69	69	69	69	69	69	69	69
100.5	0.1392	0.1274	0.1166	0.122	0.1342	0.1068	0.0964	0.0834	0.0784	0.0592	0.0498	0.0498		1	1	1	1	1	1	1	1	1	1	1	1			0.1392	0.1274	0.1166	0.122	0.1342	0.1068	0.0964	0.0834	0.0784	0.0592	0.0498	0.0498			70	70	70	70	70	70	70	70
102	0.1502	0.1324	0.1256	0.13	0.1432	0.1178	0.1104	0.0894	0.0874	0.0652	0.0568	0.0538		1	1	1	1	1	1	1	1	1	1	1	1			0.1502	0.1324	0.1256	0.13	0.1432	0.1178	0.1104	0.0894	0.0874	0.0652	0.0568	0.0538			71	71	71	71	71	71	71	71
103.5	0.1622	0.1434	0.1336	0.141	0.1512	0.1288	0.1224	0.0974	0.0954	0.0692	0.0618	0.0588		1	1	1	1	1	1	1	1	1	1	1	1			0.1622	0.1434	0.1336	0.141	0.1512	0.1288	0.1224	0.0974	0.0954	0.0692	0.0618	0.0588			72	72	72	72	72	72	72	72
105	0.1692	0.1534	0.1466	0.149	0.1622	0.1378	0.1304	0.1074	0.1054	0.0772	0.0678	0.0658		1	1	1	1	1	1	1	1	1	1	1	1			0.1692	0.1534	0.1466	0.149	0.1622	0.1378	0.1304	0.1074	0.1054	0.0772	0.0678	0.0658			73	73	73	73	73	73	73	73
106.5	0.1792	0.1604	0.1566	0.153	0.1742	0.1498	0.1374	0.1164	0.1134	0.0862	0.0748	0.0718		1	1	1	1	1	1	1	1	1	1	1	1			0.1792	0.1604	0.1566	0.153	0.1742	0.1498	0.1374	0.1164	0.1134	0.0862	0.0748	0.0718			74	74	74	74	74	74	74	74
108	0.1892	0.1704	0.1676	0.167	0.1872	0.1568	0.1464	0.1254	0.1254	0.0942	0.0818	0.0788		1	1	1	1	1	1	1	1	1	1	1	1			0.1892	0.1704	0.1676	0.167	0.1872	0.1568	0.1464	0.1254	0.1254	0.0942	0.0818	0.0788			75	75	75	75	75	75	75	75
109.5	0.1932	0.1814	0.1716	0.181	0.1932	0.1658	0.1554	0.1374	0.1324	0.1002	0.0868	0.0868		1	1	1	1	1	1	1	1	1	1	1	1			0.1932	0.1814	0.1716	0.181	0.1932	0.1658	0.1554	0.1374	0.1324	0.1002	0.0868	0.0868			76	76	76	76	76	76	76	76
111	0.2102	0.1934	0.1836	0.19	0.2012	0.1768	0.1674	0.1504	0.1404	0.1112	0.0958	0.0928		1	1	1	1	1	1	1	1	1	1	1	1			0.2102	0.1934	0.1836	0.19	0.2012	0.1768	0.1674	0.1504	0.1404	0.1112	0.0958	0.0928			77	77	77	77	77	77	77	77
112.5	0.2162	0.2014	0.1976	0.2	0.2172	0.1878	0.1794	0.1554	0.1484	0.1202	0.1048	0.0998		1	1	1	1	1	1	1	1	1	1	1	1			0.2162	0.2014	0.1976	0.2	0.2172	0.1878	0.1794	0.1554	0.1484	0.1202	0.1048	0.0998			78	78	78	78	78	78	78	78
114	0.2292	0.2084	0.2106	0.21	0.2262	0.1988	0.1864	0.1644	0.1594	0.1292	0.1118	0.1068		1	1	1	1	1	1	1	1	1	1	1	1			0.2292	0.2084	0.2106	0.21	0.2262	0.1988	0.1864	0.1644	0.1594	0.1292	0.1118	0.1068			79	79	79	79	79	79	79	79
115.5	0.2422	0.2154	0.2176	0.22	0.2342	0.2068	0.1954	0.1724	0.1664	0.1382	0.1168	0.1168		1	1	1	1	1	1	1	1	1	1	1	1			0.2422	0.2154	0.2176	0.22	0.2342	0.2068	0.1954	0.1724	0.1664	0.1382	0.1168	0.1168			80	80	80	80	80	80	80	80
117	0.2452	0.2244	0.2276	0.227	0.2442	0.2148	0.2034	0.1804	0.1734	0.1462	0.1258	0.1218		1	1	1	1	1	1	1	1	1	1	1	1			0.2452	0.2244	0.2276	0.227	0.2442	0.2148	0.2034	0.1804	0.1734	0.1462	0.1258	0.1218			81	81	81	81	81	81	81	81
118.5	0.2532	0.2374	0.2336	0.239	0.2542	0.2258	0.2144	0.1934	0.1844	0.1532	0.1348	0.1298		1	1	1	1	1	1	1	1	1	1	1	1			0.2532	0.2374	0.2336	0.239	0.2542	0.2258	0.2144	0.1934	0.1844	0.1532	0.1348	0.1298			82	82	82	82	82	82	82	82
120	0.2642	0.2474	0.2446	0.249	0.2602	0.2348	0.2234	0.2024	0.1954	0.1602	0.1408	0.1368		1	1	1	1	1	1	1	1	1	1	1	1			0.2642	0.2474	0.2446	0.249	0.2602	0.2348	0.2234	0.2024	0.1954	0.1602	0.1408	0.1368			83	83	83	83	83	83	83	83
121.5	0.2782	0.2544	0.2556	0.258	0.2702	0.2418	0.2344	0.2074	0.2034	0.1682	0.1508	0.1448		1	1	1	1	1	1	1	1	1	1	1	1			0.2782	0.2544	0.2556	0.258	0.2702	0.2418	0.2344	0.2074	0.2034	0.1682	0.1508	0.1448			84	84	84	84	84	84	84	84
123	0.2852	0.2614	0.2726	0.264	0.2872	0.2508	0.2394	0.2204	0.2114	0.1772	0.1558	0.1538		1	1	1	1	1	1	1	1	1	1	1	1			0.2852	0.2614	0.2726	0.264	0.2872	0.2508	0.2394	0.2204	0.2114	0.1772	0.1558	0.1538			85	85	85	85	85	85	85	85
124.5	0.2912	0.2724	0.2746	0.273	0.2952	0.2598	0.2494	0.2274	0.2204	0.1852	0.1628	0.1578		1	1	1	1	1	1	1	1	1	1	1	1			0.2912	0.2724	0.2746	0.273	0.2952	0.2598	0.2494	0.2274	0.2204	0.1852	0.1628	0.1578			86	86	86	86	86	86	86	86
126	0.2982	0.2804	0.2836	0.282	0.2992	0.2678	0.2564	0.2354	0.2284	0.1952	0.1738	0.1668		1	1	1	1	1	1	1	1	1	1	1	1			0.2982	0.2804	0.2836	0.282	0.2992	0.2678	0.2564	0.2354	0.2284	0.1952	0.1738	0.1668			87	87	87	87	87	87	87	87
127.5	0.3092	0.2944	0.2946	0.297	0.3072	0.2778	0.2624	0.2454	0.2394	0.1982	0.1818	0.1748		1	1	1	1	1	1	1	1	1	1	1	1			0.3092	0.2944	0.2946	0.297	0.3072	0.2778	0.2624	0.2454	0.2394	0.1982	0.1818	0.1748			88	88	88	88	88	88	88	88
129	0.3112	0.3054	0.3026	0.307	0.3172	0.2888	0.2734	0.2504	0.2444	0.2092	0.1868	0.1828		1	1	1	1	1	1	1	1	1	1	1	1			0.3112	0.3054	0.3026	0.307	0.3172	0.2888	0.2734	0.2504	0.2444	0.2092	0.1868	0.1828			89	89	89	89	89	89	89	89
130.5	0.3202	0.3084	0.3106	0.311	0.3202	0.2868	0.2844	0.2624	0.2534	0.2192	0.1958	0.1888		1	1	1	1	1	1	1	1	1	1	1	1			0.3202	0.3084	0.3106	0.311	0.3202	0.2868	0.2844	0.2624	0.2534	0.2192	0.1958	0.1888			90	90	90	90	90	90	90	90
132	0.3292	0.3154	0.3186	0.317	0.3232	0.2878	0.2934	0.2694	0.2634	0.2232	0.2048	0.1948		1	1	1	1	1	1	1	1	1	1	1	1			0.3292	0.3154	0.3186	0.317	0.3232	0.2878	0.2934	0.2694	0.2634	0.2232	0.2048	0.1948			91	91	91	91	91	91	91	91
133.5	0.3322	0.3274	0.3246	0.327	0.3362	0.3108	0.3024	0.2754	0.2684	0.2322	0.2118	0.2018		1	1	1	1	1	1	1	1	1	1	1	1			0.3322	0.3274	0.3246	0.327	0.3362	0.3108	0.3024	0.2754	0.2684	0.2322	0.2118	0.2018			92	92	92	92	92	92	92	92
135	0.3372	0.3394	0.3306	0.341	0.3382	0.3208	0.3064	0.2794	0.2744	0.2382	0.2128	0.2068		1	1	1	1	1	1	1	1	1	1	1	1			0.3372	0.3394	0.3306	0.341	0.3382	0.3208	0.3064	0.2794	0.2744	0.2382	0.2128	0.2068			93	93	93	93	93	93	93	93
136.5	0.3442	0.3414	0.3386	0.344	0.3442	0.3228	0.3124	0.2874	0.2844	0.2462	0.2208	0.2138		1	1	1	1	1	1	1	1	1	1	1	1			0.3442	0.3414	0.3386	0.344	0.3442	0.3228	0.3124	0.2874	0.2844	0.2462	0.2208	0.2138			94	94	94	94	94	94	94	94
138	0.3602	0.3444	0.3426	0.357	0.3552	0.3278	0.3204	0.3004	0.2914	0.2552	0.2278	0.2188		1	1	1	1	1	1	1	1	1	1	1	1			0.3602	0.3444	0.3426	0.357	0.3552	0.3278	0.3204	0.3004	0.2914	0.2552	0.2278	0.2188			95	95	95	95	95	95	95	95
139.5	0.3702	0.3554	0.3506	0.357	0.3662	0.3368	0.3254	0.3034	0.2984	0.2592	0.2358	0.2278		1	1	1	1	1	1	1	1	1	1	1	1			0.3702	0.3554	0.3506	0.357	0.3662	0.3368	0.3254	0.3034	0.2984	0.2592	0.2358	0.2278			96	96	96	96	96	96	96	96
141	0.3782	0.3624	0.3566	0.371	0.3752	0.3368	0.3354	0.3094	0.3064	0.2682	0.2448	0.2378		1	1	1	1	1	1	1	1	1	1	1	1			0.3782	0.3624	0.3566	0.371	0.3752	0.3368	0.3354	0.3094	0.3064	0.2682	0.2448	0.2378			97	97	97	97	97	97	97	97
142.5	0.3942	0.3644	0.3676	0.382	0.3892	0.3398	0.3474	0.3174	0.3154	0.2772	0.2548	0.2398		1	1	1	1	1	1	1	1	1	1	1	1			0.3942	0.3644	0.3676	0.382	0.3892	0.3398	0.3474	0.3174	0.3154	0.2772	0.2548	0.2398			98	98	98	98	98	98	98	98
144	0.3912	0.3734	0.3686	0.387	0.4002	0.3518	0.3504	0.3204	0.3254	0.2882	0.2598	0.2448		1	1	1	1	1	1	1	1	1	1	1	1			0.3912	0.3734	0.3686	0.387	0.4002	0.3518	0.3504	0.3204	0.3254	0.2882	0.2598	0.2448			99	99	99	99	99	99	99	99
145.5	0.3942	0.3904	0.3816	0.386	0.4052	0.3548	0.3554	0.3254	0.3224	0.2922	0.2598	0.2558		1	1	1	1	1	1	1	1	1	1	1	1			0.3942	0.3904	0.3816	0.386	0.4052	0.3548	0.3554	0.3254	0.3224	0.2922	0.2598	0.2558			100	100	100	100	100	100	100	100
147	0.4002	0.3934	0.3966	0.394	0.4112	0.3678	0.3564	0.3384	0.3294	0.2972	0.2678	0.2618		1	1	1	1	1	1	1	1	1	1	1	1			0.4002	0.3934	0.3966	0.394	0.4112	0.3678	0.3564	0.3384	0.3294	0.2972	0.2678	0.2618			101	101	101	101	101	101	101	101
148.5	0.4072	0.3944	0.3956	0.408	0.4212	0.3698	0.3694	0.3474	0.3384	0.2992	0.2758	0.2648		1	1	1	1	1	1	1	1	1	1	1	1			0.4072	0.3944	0.3956	0.408	0.4212	0.3698	0.3694	0.3474	0.3384	0.2992	0.2758	0.2648			102	102	102	102	102	102	102	102
150	0.4172	0.4014	0.3966	0.419	0.4302	0.3658	0.3784	0.3514	0.3454	0.3062	0.2838	0.2708		1	1	1	1	1	1	1	1	1	1	1	1			0.4172	0.4014	0.3966	0.419	0.4302	0.3658	0.3784	0.3514	0.3454	0.3062	0.2838	0.2708			103	103	103	103	103	103	103	103
151.5	0.4272	0.4124	0.3996	0.426	0.4332	0.3768	0.3864	0.3554	0.3514	0.3162	0.2898	0.2738		1	1	1	1	1	1	1	1	1	1	1	1			0.4272	0.4124	0.3996	0.426	0.4332	0.3768	0.3864	0.3554	0.3514	0.3162	0.2898	0.2738			104	104	104	104	104	104	104	104
153	0.4352	0.4194	0.4136	0.436	0.4372	0.3868	0.3984	0.3644	0.3594	0.3222	0.2968	0.2848		1	1	1	1	1	1	1	1	1	1	1	1			0.4352	0.4194	0.4136	0.436	0.4372	0.3868	0.3984	0.3644	0.3594	0.3222	0.2968	0.2848			105	105	105	105	105	105	105	105
154.5	0.4222	0.4254	0.4296	0.429	0.4492	0.3998	0.4064	0.3724	0.3654	0.3292	0.2978	0.2898		1	1	1	1	1	1	1	1	1	1	1	1			0.4222	0.4254	0.4296	0.429	0.4492	0.3998	0.4064	0.3724	0.3654	0.3292	0.2978	0.2898			106	106	106	106	106	106	106	106
156	0.4292	0.4284	0.4286	0.449	0.4502	0.4078	0.4074	0.3754	0.3744	0.3352	0.3008	0.2968		1	1	1	1	1	1	1	1	1	1	1	1			0.4292	0.4284	0.4286	0.449	0.4502	0.4078	0.4074	0.3754	0.3744	0.3352	0.3008	0.2968			107	107	107	107	107	107	107	107
157.5	0.4482	0.4464	0.4346	0.454	0.4422	0.4088	0.4154	0.3874	0.3794	0.3362	0.3098	0.2988		1	1	1	1	1	1	1	1	1	1	1	1			0.4482	0.4464	0.4346	0.454	0.4422	0.4088	0.4154	0.3874	0.3794	0.3362	0.3098	0.2988			108	108	108	108	108	108	108	108
159	0.4512	0.4554	0.4516	0.459	0.4482	0.4198	0.4214	0.3894	0.3854	0.3462	0.3238	0.3068		1	1	1	1	1	1	1	1	1	1	1	1			0.4512	0.4554	0.4516	0.459	0.4482	0.4198	0.4214	0.3894	0.3854	0.3462	0.3238	0.3068			109	109	109	109	109	109	109	109
160.5	0.4672	0.4524	0.4566	0.471	0.4612	0.4238	0.4314	0.3894	0.3914	0.3492	0.3238	0.3108		1	1	1	1	1	1	1	1	1	1	1	1			0.4672	0.4524	0.4566	0.471	0.4612	0.4238	0.4314	0.3894	0.3914	0.3492	0.3238	0.3108			110	110	110	110	110	110	110	110
162	0.4762	0.4524	0.4606	0.475	0.4732	0.4298	0.4404	0.3924	0.4014	0.3662	0.3318	0.3138		1	1	1	1	1	1	1	1	1	1	1	1			0.4762	0.4524	0.4606	0.475	0.4732	0.4298	0.4404	0.3924	0.4014	0.3662	0.3318	0.3138			111	111	111	111	111	111	111	111
163.5	0.4752	0.4614	0.4486	0.465	0.4802	0.4348	0.4314	0.3974	0.4064	0.3762	0.3338	0.3238		1	1	1	1	1	1	1	1	1	1	1	1			0.4752	0.4614	0.4486	0.465	0.4802	0.4348	0.4314	0.3974	0.4064	0.3762	0.3338	0.3238			112	112	112	112	112	112	112	112
165	0.4792	0.4674	0.4576	0.477	0.4972	0.4478	0.4394	0.4084	0.4094	0.3792	0.3368	0.3278		1	1	1	1	1	1	1	1	1	1	1	1			0.4792	0.4674	0.4576	0.477	0.4972	0.4478	0.4394	0.4084	0.4094	0.3792	0.3368	0.3278			113	113	113	113	113	113	113	113
166.5	0.4772	0.4844	0.4626	0.487	0.4972	0.4568	0.4484	0.4174	0.4164	0.3792	0.3408	0.3358		1	1	1	1	1	1	1	1	1	1	1	1			0.4772	0.4844	0.4626	0.487	0.4972	0.4568	0.4484	0.4174	0.4164	0.3792	0.3408	0.3358			114	114	114	114	114	114	114	114
168	0.4902	0.4884	0.5006	0.491	0.5102	0.4598	0.4534	0.4254	0.4234	0.3892	0.3458	0.3408		1	1	1	1	1	1	1	1	1	1	1	1			0.4902	0.4884	0.5006	0.491	0.5102	0.4598	0.4534	0.4254	0.4234	0.3892	0.3458	0.3408			115	115	115	115	115	115	115	115
169.5	0.4912	0.4834	0.4996	0.49	0.5152	0.4598	0.4584	0.4274	0.4224	0.3922	0.3478	0.3368		1	1	1	1	1	1	1	1	1	1	1	1			0.4912	0.4834	0.4996	0.49	0.5152	0.4598	0.4584	0.4274	0.4224	0.3922	0.3478	0.3368			116	116	116	116	116	116	116	116
171	0.4922	0.4934	0.5046	0.51	0.5232	0.4528	0.4684	0.4334	0.4324	0.3942	0.3508	0.3458		1	1	1	1	1	1	1	1	1	1	1	1			0.4922	0.4934	0.5046	0.51	0.5232	0.4528	0.4684	0.4334	0.4324	0.3942	0.3508	0.3458			117	117	117	117	117	117	117	117
172.5	0.4992	0.4924	0.5036	0.519	0.5232	0.4678	0.4594	0.4394	0.4384	0.4052	0.3658	0.3578		1	1	1	1	1	1	1	1	1	1	1	1			0.4992	0.4924	0.5036	0.519	0.5232	0.4678	0.4594	0.4394	0.4384	0.4052	0.3658	0.3578			118	118	118	118	118	118	118	118
174	0.5082	0.4994	0.5156	0.511	0.5332	0.4758	0.4754	0.4424	0.4474	0.4052	0.3688	0.3588		1	1	1	1	1	1	1	1	1	1	1	1			0.5082	0.4994	0.5156	0.511	0.5332	0.4758	0.4754	0.4424	0.4474	0.4052	0.3688	0.3588			119	119	119	119	119	119	119	119
175.5	0.5252	0.5084	0.5276	0.519	0.5402	0.4858	0.4834	0.4574	0.4514	0.4062	0.3758	0.3578		1	1	1	1	1	1	1	1	1	1	1	1			0.5252	0.5084	0.5276	0.519	0.5402	0.4858	0.4834	0.4574	0.4514	0.4062	0.3758	0.3578			120	120	120	120	120	120	120	120
177	0.5252	0.5274	0.5316	0.527	0.5452	0.4788	0.4904	0.4504	0.4484	0.4192	0.3778	0.3618		1	1	1	1	1	1	1	1	1	1	1	1			0.5252	0.5274	0.5316	0.527	0.5452	0.4788	0.4904	0.4504	0.4484	0.4192	0.3778	0.3618			121	121	121	121	121	121	121	121
178.5	0.5282	0.5394	0.5456	0.537	0.5482	0.4908	0.4894	0.4494	0.4544	0.4182	0.3798	0.3688		1	1	1	1	1	1	1	1	1	1	1	1			0.5282	0.5394	0.5456	0.537	0.5482	0.4908	0.4894	0.4494	0.4544	0.4182	0.3798	0.3688			122	122	122	122	122	122	122	122
180	0.5352	0.5474	0.5446	0.552	0.5492	0.4958	0.4954	0.4514	0.4694	0.4242	0.3828	0.3728		1	1	1	1	1	1	1	1	1	1	1	1			0.5352	0.5474	0.5446	0.552	0.5492	0.4958	0.4954	0.4514	0.4694	0.4242	0.3828	0.3728			123	123	123	123	123	123	123	123
181.5	0.5452	0.5464	0.5366	0.556	0.5502	0.5128	0.5054	0.4704	0.4734	0.4312	0.3868	0.3738		1	1	1	1	1	1	1	1	1	1	1	1			0.5452	0.5464	0.5366	0.556	0.5502	0.5128	0.5054	0.4704	0.4734	0.4312	0.3868	0.3738			124	124	124	124	124	124	124	124
183	0.5442	0.5504	0.5536	0.538	0.5512	0.5138	0.5174	0.4754	0.4754	0.4232	0.3928	0.3798		1	1	1	1	1	1	1	1	1	1	1	1			0.5442	0.5504	0.5536	0.538	0.5512	0.5138	0.5174	0.4754	0.4754	0.4232	0.3928	0.3798			125	125	125	125	125	125	125	125
184.5	0.5462	0.5544	0.5506	0.55	0.5612	0.5208	0.5144	0.4774	0.4804	0.4442	0.4008	0.3838		1	1	1	1	1	1	1	1	1	1	1	1			0.5462	0.5544	0.5506	0.55	0.5612	0.5208	0.5144	0.4774	0.4804	0.4442	0.4008	0.3838			126	126	126	126	126	126	126	126
186	0.5602	0.5464	0.5486	0.539	0.5672	0.5188	0.5174	0.4874	0.4944	0.4532	0.4078	0.3888		1	1	1	1	1	1	1	1	1	1	1	1			0.5602	0.5464	0.5486	0.539	0.5672	0.5188	0.5174	0.4874	0.4944	0.4532	0.4078	0.3888			127	127	127	127	127	127	127	127
187.5	0.5632	0.5614	0.5626	0.549	0.5812	0.5338	0.5304	0.4854	0.4944	0.4572	0.4098	0.3968		1	1	1	1	1	1	1	1	1	1	1	1			0.5632	0.5614	0.5626	0.549	0.5812	0.5338	0.5304	0.4854	0.4944	0.4572	0.4098	0.3968			128	128	128	128	128	128	128	128
189	0.5632	0.5704	0.5706	0.573	0.5862	0.5418	0.5324	0.4944	0.4994	0.4692	0.4108	0.3978		1	1	1	1	1	1	1	1	1	1	1	1			0.5632	0.5704	0.5706	0.573	0.5862	0.5418	0.5324	0.4944	0.4994	0.4692	0.4108	0.3978			129	129	129	129	129	129	129	129
190.5	0.5642	0.5784	0.5866	0.592	0.5922	0.5488	0.5364	0.5114	0.4894	0.4732	0.4118	0.4018		1	1	1	1	1	1	1	1	1	1	1	1			0.5642	0.5784	0.5866	0.592	0.5922	0.5488	0.5364	0.5114	0.4894	0.4732	0.4118	0.4018			130	130	130	130	130	130	130	130
192	0.5682	0.5954	0.5846	0.586	0.6002	0.5478	0.5374	0.5114	0.5094	0.4712	0.4238	0.4078		1	1	1	1	1	1	1	1	1	1	1	1			0.5682	0.5954	0.5846	0.586	0.6002	0.5478	0.5374	0.5114	0.5094	0.4712	0.4238	0.4078			131	131	131	131	131	131	131	131
193.5	0.5672	0.6044	0.5916	0.586	0.6142	0.5578	0.5494	0.5094	0.5144	0.4752	0.4208	0.4038		1	1	1	1	1	1	1	1	1	1	1	1			0.5672	0.6044	0.5916	0.586	0.6142	0.5578	0.5494	0.5094	0.5144	0.4752	0.4208	0.4038			132	132	132	132	132	132	132	132
195	0.5842	0.6004	0.6076	0.59	0.6112	0.5588	0.5494	0.5234	0.5204	0.4692	0.4298	0.4128		1	1	1	1	1	1	1	1	1	1	1	1			0.5842	0.6004	0.6076	0.59	0.6112	0.5588	0.5494	0.5234	0.5204	0.4692	0.4298	0.4128			133	133	133	133	133	133	133	133
196.5	0.5882	0.5974	0.6106	0.588	0.6172	0.5718	0.5564	0.5234	0.5194	0.4832	0.4388	0.4208		1	1	1	1	1	1	1	1	1	1	1	1			0.5882	0.5974	0.6106	0.588	0.6172	0.5718	0.5564	0.5234	0.5194	0.4832	0.4388	0.4208			134	134	134	134	134	134	134	134
198	0.6052	0.6034	0.6136	0.6	0.6172	0.5768	0.5554	0.5314	0.5224	0.4852	0.4378	0.4148		1	1	1	1	1	1	1	1	1	1	1	1			0.6052	0.6034	0.6136	0.6	0.6172	0.5768	0.5554	0.5314	0.5224	0.4852	0.4378	0.4148			135	135	135	135	135	135	135	135
199.5	0.6102	0.6124	0.6166	0.624	0.6092	0.5708	0.5684	0.5234	0.5344	0.4852	0.4398	0.4358		1	1	1	1	1	1	1	1	1	1	1	1			0.6102	0.6124	0.6166	0.624	0.6092	0.5708	0.5684	0.5234	0.5344	0.4852	0.4398	0.4358			136	136	136	136	136	136	136	136
201	0.6032	0.6204	0.6166	0.621	0.6182	0.5868	0.5674	0.5444	0.5304	0.4902	0.4498	0.4348		1	1	1	1	1	1	1	1	1	1	1	1			0.6032	0.6204	0.6166	0.621	0.6182	0.5868	0.5674	0.5444	0.5304	0.4902	0.4498	0.4348			137	137	137	137	137	137	137	137
202.5	0.6072	0.6314	0.6226	0.615	0.6362	0.5988	0.5724	0.5494	0.5324	0.4972	0.4558	0.4448		1	1	1	1	1	1	1	1	1	1	1	1			0.6072	0.6314	0.6226	0.615	0.6362	0.5988	0.5724	0.5494	0.5324	0.4972	0.4558	0.4448			138	138	138	138	138	138	138	138
204	0.6242	0.6164	0.6396	0.631	0.6312	0.6018	0.5854	0.5554	0.5454	0.5072	0.4618	0.4448		1	1	1	1	1	1	1	1	1	1	1	1			0.6242	0.6164	0.6396	0.631	0.6312	0.6018	0.5854	0.5554	0.5454	0.5072	0.4618	0.4448			139	139	139	139	139	139	139	139
205.5	0.6222	0.6184	0.6296	0.63	0.6452	0.5988	0.5924	0.5524	0.5514	0.5142	0.4718	0.4488		1	1	1	1	1	1	1	1	1	1	1	1			0.6222	0.6184	0.6296	0.63	0.6452	0.5988	0.5924	0.5524	0.5514	0.5142	0.4718	0.4488			140	140	140	140	140	140	140	140
207	0.6292	0.6354	0.6366	0.617	0.6502	0.6108	0.6024	0.5564	0.5604	0.5322	0.4718	0.4478		1	1	1	1	1	1	1	1	1	1	1	1			0.6292	0.6354	0.6366	0.617	0.6502	0.6108	0.6024	0.5564	0.5604	0.5322	0.4718	0.4478			141	141	141	141	141	141	141	141
208.5	0.6342	0.6424	0.6436	0.626	0.6532	0.6068	0.6014	0.5534	0.5534	0.5312	0.4788	0.4548		1	1	1	1	1	1	1	1	1	1	1	1			0.6342	0.6424	0.6436	0.626	0.6532	0.6068	0.6014	0.5534	0.5534	0.5312	0.4788	0.4548			142	142	142	142	142	142	142	142
210	0.6292	0.6434	0.6506	0.632	0.6582	0.6028	0.6014	0.5564	0.5594	0.5302	0.4828	0.4638		1	1	1	1	1	1	1	1	1	1	1	1			0.6292	0.6434	0.6506	0.632	0.6582	0.6028	0.6014	0.5564	0.5594	0.5302	0.4828	0.4638			143	143	143	143	143	143	143	143
211.5	0.6402	0.6504	0.6546	0.647	0.6692	0.6178	0.6084	0.5664	0.5704	0.5332	0.4868	0.4718		1	1	1	1	1	1	1	1	1	1	1	1			0.6402	0.6504	0.6546	0.647	0.6692	0.6178	0.6084	0.5664	0.5704	0.5332	0.4868	0.4718			144	144	144	144	144	144	144	144
213	0.6502	0.6564	0.6586	0.651	0.6782	0.6398	0.6114	0.5804	0.5714	0.5402	0.4978	0.4728		1	1	1	1	1	1	1	1	1	1	1	1			0.6502	0.6564	0.6586	0.651	0.6782	0.6398	0.6114	0.5804	0.5714	0.5402	0.4978	0.4728			145	145	145	145	145	145	145	145
214.5	0.6452	0.6714	0.6686	0.659	0.6732	0.6338	0.6214	0.5774	0.5774	0.5362	0.4928	0.4778		1	1	1	1	1	1	1	1	1	1	1	1			0.6452	0.6714	0.6686	0.659	0.6732	0.6338	0.6214	0.5774	0.5774	0.5362	0.4928	0.4778			146	146	146	146	146	146	146	146
216	0.6532	0.6694	0.6726	0.66	0.6752	0.6388	0.6164	0.5844	0.5884	0.5442	0.5108	0.4808		1	1	1	1	1	1	1	1	1	1	1	1			0.6532	0.6694	0.6726	0.66	0.6752	0.6388	0.6164	0.5844	0.5884	0.5442	0.5108	0.4808			147	147	147	147	147	147	147	147
217.5	0.6602	0.6674	0.6786	0.66	0.6662	0.6428	0.6154	0.5804	0.5924	0.5452	0.5038	0.4808		1	1	1	1	1	1	1	1	1	1	1	1			0.6602	0.6674	0.6786	0.66	0.6662	0.6428	0.6154	0.5804	0.5924	0.5452	0.5038	0.4808			148	148	148	148	148	148	148	148
219	0.6652	0.6704	0.6846	0.664	0.6862	0.6448	0.6244	0.5864	0.5944	0.5472	0.5168	0.4938		1	1	1	1	1	1	1	1	1	1	1	1			0.6652	0.6704	0.6846	0.664	0.6862	0.6448	0.6244	0.5864	0.5944	0.5472	0.5168	0.4938			149	149	149	149	149	149	149	149
220.5	0.6522	0.6724	0.6926	0.667	0.6952	0.6568	0.6264	0.5904	0.5924	0.5432	0.5168	0.4888		1	1	1	1	1	1	1	1	1	1	1	1			0.6522	0.6724	0.6926	0.667	0.6952	0.6568	0.6264	0.5904	0.5924	0.5432	0.5168	0.4888			150	150	150	150	150	150	150	150
222	0.6612	0.6844	0.6976	0.659	0.6952	0.6648	0.6334	0.6044	0.5934	0.5542	0.5208	0.4948		1	1	1	1	1	1	1	1	1	1	1	1			0.6612	0.6844	0.6976	0.659	0.6952	0.6648	0.6334	0.6044	0.5934	0.5542	0.5208	0.4948			151	151	151	151	151	151	151	151
223.5	0.6622	0.6904	0.6996	0.663	0.6962	0.6628	0.6424	0.6024	0.6054	0.5512	0.5238	0.5008		1	1	1	1	1	1	1	1	1	1	1	1			0.6622	0.6904	0.6996	0.663	0.6962	0.6628	0.6424	0.6024	0.6054	0.5512	0.5238	0.5008			152	152	152	152	152	152	152	152
225	0.6712	0.6924	0.7066	0.681	0.6942	0.6648	0.6524	0.6044	0.6054	0.5652	0.5278	0.4998		1	1	1	1	1	1	1	1	1	1	1	1			0.6712	0.6924	0.7066	0.681	0.6942	0.6648	0.6524	0.6044	0.6054	0.5652	0.5278	0.4998			153	153	153	153	153	153	153	153
226.5	0.6812	0.6994	0.7056	0.688	0.7012	0.6688	0.6494	0.6094	0.6044	0.5722	0.5278	0.4928		1	1	1	1	1	1	1	1	1	1	1	1			0.6812	0.6994	0.7056	0.688	0.7012	0.6688	0.6494	0.6094	0.6044	0.5722	0.5278	0.4928			154	154	154	154	154	154	154	154
228	0.6832	0.7094	0.6996	0.693	0.7122	0.6808	0.6574	0.6084	0.6074	0.5782	0.5348	0.5038		1	1	1	1	1	1	1	1	1	1	1	1			0.6832	0.7094	0.6996	0.693	0.7122	0.6808	0.6574	0.6084	0.6074	0.5782	0.5348	0.5038			155	155	155	155	155	155	155	155
229.5	0.6902	0.7174	0.7116	0.703	0.7112	0.6728	0.6584	0.6194	0.6184	0.5812	0.5308	0.5098		1	1	1	1	1	1	1	1	1	1	1	1			0.6902	0.7174	0.7116	0.703	0.7112	0.6728	0.6584	0.6194	0.6184	0.5812	0.5308	0.5098			156	156	156	156	156	156	156	156
231	0.6882	0.7124	0.7106	0.703	0.7102	0.6708	0.6694	0.6284	0.6234	0.5832	0.5478	0.5128		1	1	1	1	1	1	1	1	1	1	1	1			0.6882	0.7124	0.7106	0.703	0.7102	0.6708	0.6694	0.6284	0.6234	0.5832	0.5478	0.5128			157	157	157	157	157	157	157	157
232.5	0.6902	0.7094	0.7136	0.699	0.7142	0.6718	0.6664	0.6284	0.6264	0.6022	0.5538	0.5148		1	1	1	1	1	1	1	1	1	1	1	1			0.6902	0.7094	0.7136	0.699	0.7142	0.6718	0.6664	0.6284	0.6264	0.6022	0.5538	0.5148			158	158	158	158	158	158	158	158
234	0.7002	0.7144	0.7166	0.711	0.7262	0.6768	0.6654	0.6344	0.6314	0.6042	0.5558	0.5158		1	1	1	1	1	1	1	1	1	1	1	1			0.7002	0.7144	0.7166	0.711	0.7262	0.6768	0.6654	0.6344	0.6314	0.6042	0.5558	0.5158			159	159	159	159	159	159	159	159
235.5	0.7112	0.7234	0.7286	0.72	0.7272	0.6818	0.6694	0.6364	0.6364	0.6032	0.5548	0.5288		1	1	1	1	1	1	1	1	1	1	1	1			0.7112	0.7234	0.7286	0.72	0.7272	0.6818	0.6694	0.6364	0.6364	0.6032	0.5548	0.5288			160	160	160	160	160	160	160	160
237	0.7162	0.7204	0.7296	0.721	0.7262	0.6868	0.6704	0.6364	0.6444	0.6022	0.5618	0.5318		1	1	1	1	1	1	1	1	1	1	1	1			0.7162	0.7204	0.7296	0.721	0.7262	0.6868	0.6704	0.6364	0.6444	0.6022	0.5618	0.5318			161	161	161	161	161	161	161	161
238.5	0.7172	0.7254	0.7296	0.716	0.7312	0.6998	0.6814	0.6444	0.6444	0.6082	0.5678	0.5338		1	1	1	1	1	1	1	1	1	1	1	1			0.7172	0.7254	0.7296	0.716	0.7312	0.6998	0.6814	0.6444	0.6444	0.6082	0.5678	0.5338			162	162	162	162	162	162	162	162
240	0.7182	0.7264	0.7296	0.722	0.7262	0.7078	0.6894	0.6494	0.6464	0.6142	0.5628	0.5268		1	1	1	1	1	1	1	1	1	1	1	1			0.7182	0.7264	0.7296	0.722	0.7262	0.7078	0.6894	0.6494	0.6464	0.6142	0.5628	0.5268			163	163	163	163	163	163	163	163
241.5	0.7152	0.7414	0.7366	0.726	0.7342	0.6998	0.6864	0.6524	0.6484	0.6092	0.5638	0.5348		1	1	1	1	1	1	1	1	1	1	1	1			0.7152	0.7414	0.7366	0.726	0.7342	0.6998	0.6864	0.6524	0.6484	0.6092	0.5638	0.5348			164	164	164	164	164	164	164	164
243	0.7212	0.7444	0.7486	0.734	0.7392	0.7008	0.6864	0.6554	0.6534	0.6102	0.5688	0.5408		1	1	1	1	1	1	1	1	1	1	1	1			0.7212	0.7444	0.7486	0.734	0.7392	0.7008	0.6864	0.6554	0.6534	0.6102	0.5688	0.5408			165	165	165	165	165	165	165	165
244.5	0.7252	0.7434	0.7486	0.733	0.7432	0.7238	0.6964	0.6614	0.6554	0.6212	0.5728	0.5438		1	1	1	1	1	1	1	1	1	1	1	1			0.7252	0.7434	0.7486	0.733	0.7432	0.7238	0.6964	0.6614	0.6554	0.6212	0.5728	0.5438			166	166	166	166	166	166	166	166
246	0.7212	0.7404	0.7466	0.731	0.7532	0.7208	0.6974	0.6644	0.6634	0.6292	0.5808	0.5438		1	1	1	1	1	1	1	1	1	1	1	1			0.7212	0.7404	0.7466	0.731	0.7532	0.7208	0.6974	0.6644	0.6634	0.6292	0.5808	0.5438			167	167	167	167	167	167	167	167
247.5	0.7262	0.7414	0.7456	0.741	0.7602	0.7148	0.7074	0.6654	0.6684	0.6252	0.5908	0.5568		1	1	1	1	1	1	1	1	1	1	1	1			0.7262	0.7414	0.7456	0.741	0.7602	0.7148	0.7074	0.6654	0.6684	0.6252	0.5908	0.5568			168	168	168	168	168	168	168	168
249	0.7272	0.7564	0.7526	0.736	0.7662	0.7138	0.7114	0.6624	0.6654	0.6302	0.5858	0.5578		1	1	1	1	1	1	1	1	1	1	1	1			0.7272	0.7564	0.7526	0.736	0.7662	0.7138	0.7114	0.6624	0.6654	0.6302	0.5858	0.5578			169	169	169	169	169	169	169	169
250.5	0.7292	0.7624	0.7546	0.747	0.7732	0.7218	0.7104	0.6734	0.6684	0.6382	0.5898	0.5588		1	1	1	1	1	1	1	1	1	1	1	1			0.7292	0.7624	0.7546	0.747	0.7732	0.7218	0.7104	0.6734	0.6684	0.6382	0.5898	0.5588			170	170	170	170	170	170	170	170
252	0.7322	0.7634	0.7636	0.751	0.7652	0.7198	0.7144	0.6804	0.6764	0.6362	0.5878	0.5668		1	1	1	1	1	1	1	1	1	1	1	1			0.7322	0.7634	0.7636	0.751	0.7652	0.7198	0.7144	0.6804	0.6764	0.6362	0.5878	0.5668			171	171	171	171	171	171	171	171
253.5	0.7382	0.7664	0.7726	0.755	0.7662	0.7198	0.7234	0.6794	0.6784	0.6412	0.5948	0.5758		1	1	1	1	1	1	1	1	1	1	1	1			0.7382	0.7664	0.7726	0.755	0.7662	0.7198	0.7234	0.6794	0.6784	0.6412	0.5948	0.5758			172	172	172	172	172	172	172	172
255	0.7422	0.7714	0.7726	0.759	0.7672	0.7298	0.7154	0.6834	0.6784	0.6432	0.5978	0.5678		1	1	1	1	1	1	1	1	1	1	1	1			0.7422	0.7714	0.7726	0.759	0.7672	0.7298	0.7154	0.6834	0.6784	0.6432	0.5978	0.5678			173	173	173	173	173	173	173	173
256.5	0.7432	0.7694	0.7746	0.761	0.7652	0.7378	0.7224	0.6904	0.6794	0.6512	0.6008	0.5788		1	1	1	1	1	1	1	1	1	1	1	1			0.7432	0.7694	0.7746	0.761	0.7652	0.7378	0.7224	0.6904	0.6794	0.6512	0.6008	0.5788			174	174	174	174	174	174	174	174
258	0.7442	0.7734	0.7736	0.76	0.7812	0.7398	0.7224	0.6864	0.6874	0.6572	0.6098	0.5788		1	1	1	1	1	1	1	1	1	1	1	1			0.7442	0.7734	0.7736	0.76	0.7812	0.7398	0.7224	0.6864	0.6874	0.6572	0.6098	0.5788			175	175	175	175	175	175	175	175
259.5	0.7482	0.7774	0.7746	0.768	0.7892	0.7358	0.7264	0.6944	0.6884	0.6592	0.6118	0.5798		1	1	1	1	1	1	1	1	1	1	1	1			0.7482	0.7774	0.7746	0.768	0.7892	0.7358	0.7264	0.6944	0.6884	0.6592	0.6118	0.5798			176	176	176	176	176	176	176	176
261	0.7552	0.7834	0.7796	0.775	0.7882	0.7378	0.7374	0.6974	0.6904	0.6632	0.6178	0.5848		1	1	1	1	1	1	1	1	1	1	1	1			0.7552	0.7834	0.7796	0.775	0.7882	0.7378	0.7374	0.6974	0.6904	0.6632	0.6178	0.5848			177	177	177	177	177	177	177	177
262.5	0.7532	0.7804	0.7816	0.779	0.7802	0.7458	0.7424	0.7004	0.6944	0.6662	0.6158	0.5828		1	1	1	1	1	1	1	1	1	1	1	1			0.7532	0.7804	0.7816	0.779	0.7802	0.7458	0.7424	0.7004	0.6944	0.6662	0.6158	0.5828			178	178	178	178	178	178	178	178
264	0.7532	0.7884	0.7876	0.773	0.7912	0.7458	0.7414	0.6984	0.6964	0.6702	0.6198	0.5828		1	1	1	1	1	1	1	1	1	1	1	1			0.7532	0.7884	0.7876	0.773	0.7912	0.7458	0.7414	0.6984	0.6964	0.6702	0.6198	0.5828			179	179	179	179	179	179	179	179
265.5	0.7542	0.7894	0.7866	0.769	0.7872	0.7488	0.7414	0.6974	0.6894	0.6742	0.6178	0.5878		1	1	1	1	1	1	1	1	1	1	1	1			0.7542	0.7894	0.7866	0.769	0.7872	0.7488	0.7414	0.6974	0.6894	0.6742	0.6178	0.5878			180	180	180	180	180	180	180	180
267	0.7622	0.7924	0.7936	0.776	0.7902	0.7488	0.7454	0.7024	0.6964	0.6732	0.6158	0.6008		1	1	1	1	1	1	1	1	1	1	1	1			0.7622	0.7924	0.7936	0.776	0.7902	0.7488	0.7454	0.7024	0.6964	0.6732	0.6158	0.6008			181	181	181	181	181	181	181	181
268.5	0.7652	0.7954	0.7956	0.788	0.7962	0.7548	0.7474	0.7114	0.7044	0.6762	0.6258	0.6018		1	1	1	1	1	1	1	1	1	1	1	1			0.7652	0.7954	0.7956	0.788	0.7962	0.7548	0.7474	0.7114	0.7044	0.6762	0.6258	0.6018			182	182	182	182	182	182	182	182
270	0.7642	0.8004	0.7966	0.787	0.7982	0.7598	0.7574	0.7084	0.7064	0.6842	0.6318	0.5988		1	1	1	1	1	1	1	1	1	1	1	1			0.7642	0.8004	0.7966	0.787	0.7982	0.7598	0.7574	0.7084	0.7064	0.6842	0.6318	0.5988			183	183	183	183	183	183	183	183
[truncated: 54 more columns]

## Sheet: W42Q+WT_inositol
	2020-07-14 W42Q 20 WT 180 PIPES 10 mM pH 6.7 NaCl 150 mM inositol, X mM													2020-07-14 W42Q 20 WT 180 PIPES 10 mM pH 6.7 NaCl 150 mM inositol, X mM														2020-07-14 W42Q 20 WT 180 PIPES 10 mM pH 6.7 NaCl 150 mM inositol, X mM														2020-07-14 W42Q 20 WT 180 PIPES 10 mM pH 6.7 NaCl 150 mM inositol, X mM
	0	10	20	30	40	60	80	110	140	180	220	empty		0	10	20	30	40	60	80	110	140	180	220	empty			0	10	20	30	40	60	80	110	140	180	220	empty			0	10	20	30	40	60	80	110
0	0	0	0	0	-0.0004	0	0.0002	0	0	0	0	0		0	0	0	0	0	0	0	0	0	0	0	0			0	0	0	0	0	0	0	0	0	0	0	0			0	0	0	0	0	0	0	0
1.5	0	0	0	0	-0.0004	0	0.0002	0	0	0	0	0		0	0	0	0	0	0	0	0	0	0	0	0			0	0	0	0	0	0	0	0	0	0	0	0			0	0	0	0	0	0	0	0
3	0	0	0	0	-0.0004	0	-0.0008	0	0	0	0	0		0	0	0	0	0	0	0	0	0	0	0	0			0	0	0	0	0	0	0	0	0	0	0	0			0	0	0	0	0	0	0	0
4.5	0	0	0	0	0.0006	0	0.0002	0	0	0	0	0		0	0	0	0	0	0	0	0	0	0	0	0			0	0	0	0	0	0	0	0	0	0	0	0			0	0	0	0	0	0	0	0
6	0	0	0	0	0.0006	0	0.0002	0	0	0	0	0		0	0	0	0	0	0	0	0	0	0	0	0			0	0	0	0	0	0	0	0	0	0	0	0			0	0	0	0	0	0	0	0
7.5	0	0	0	0	-0.0004	0	-0.0008	0	0	0	0	0		0	0	0	0	0	0	0	0	0	0	0	0			0	0	0	0	0	0	0	0	0	0	0	0			0	0	0	0	0	0	0	0
9	0	0	0	0	0.0006	0	-0.0008	0	0	0	0	0		0	0	0	0	0	0	0	0	0	0	0	0			0	0	0	0	0	0	0	0	0	0	0	0			0	0	0	0	0	0	0	0
10.5	0	0.001	0	0	0.0006	0	0.0002	0	0	0	0	0		0	0	0	0	0	0	0	0	0	0	0	0			0	0	0	0	0	0	0	0	0	0	0	0			0	0	0	0	0	0	0	0
12	0	0.001	0	0	0.0006	0	0.0002	0	0	0	0.001	0		0	0	0	0	0	0	0	0	0	0	0	0			0	0	0	0	0	0	0	0	0	0	0	0			0	0	0	0	0	0	0	0
13.5	0	0.001	0	0	0.0006	0	0.0002	0	0.001	0	0	0		0	0	0	0	0	0	0	0	0	0	0	0			0	0	0	0	0	0	0	0	0	0	0	0			0	0	0	0	0	0	0	0
15	0	0	0.001	0	0.0006	0	0.0002	0	0	0	0.001	0		0	0	0	0	0	0	0	0	0	0	0	0			0	0	0	0	0	0	0	0	0	0	0	0			0	0	0	0	0	0	0	0
16.5	0	0.001	0	0	0.0006	0	0.0002	0	0	0	0.001	0		0	0	0	0	0	0	0	0	0	0	0	0			0	0	0	0	0	0	0	0	0	0	0	0			0	0	0	0	0	0	0	0
18	0	0.001	0	0	0.0006	0	0.0002	0	0	0	0.001	0		0	0	0	0	0	0	0	0	0	0	0	0			0	0	0	0	0	0	0	0	0	0	0	0			0	0	0	0	0	0	0	0
19.5	0.001	0.001	0.001	0	0.0006	0	0.0002	0	0.001	0	0.001	0		0	0	0	0	0	0	0	0	0	0	0	0			0	0	0	0	0	0	0	0	0	0	0	0			0	0	0	0	0	0	0	0
21	0	0.001	0.001	0	0.0016	0	0.0002	0	0	0	0.001	0		0	0	0	0	0	0	0	0	0	0	0	0			0	0	0	0	0	0	0	0	0	0	0	0			0	0	0	0	0	0	0	0
22.5	0.001	0.001	0.001	0.001	0.0006	0.001	0.0002	0	0.001	0	0.001	0		0	0	0	0	0	0	0	0	0	0	0	0			0	0	0	0	0	0	0	0	0	0	0	0			0	0	0	0	0	0	0	0
24	0.001	0.002	0.001	0.001	0.0016	0.001	0.0002	0.001	0.001	0	0.001	0		0	0	0	0	0	0	0	0	0	0	0	0			0	0	0	0	0	0	0	0	0	0	0	0			0	0	0	0	0	0	0	0
25.5	0.001	0.002	0.001	0.001	0.0016	0.001	0.0002	0.001	0.001	0.001	0.001	0		0	0	0	0	0	0	0	0	0	0	0	0			0	0	0	0	0	0	0	0	0	0	0	0			0	0	0	0	0	0	0	0
27	0	0.001	0.001	0.001	0.0016	0	0.0002	0	0	0.001	0.001	0		0	0	0	0	0	0	0	0	0	0	0	0			0	0	0	0	0	0	0	0	0	0	0	0			0	0	0	0	0	0	0	0
28.5	0.001	0.001	0.001	0.001	0.0016	0.001	0.0002	0.001	0.001	0.001	0.001	0		0	0	0	0	0	0	0	0	0	0	0	0			0	0	0	0	0	0	0	0	0	0	0	0			0	0	0	0	0	0	0	0
30	0.001	0.001	0.001	0.001	0.0016	0.001	0.0002	0.001	0.001	0.002	0.001	0.001		0	0	0	0	0	0	0	0	0	0	0	0			0	0	0	0	0	0	0	0	0	0	0	0			0	0	0	0	0	0	0	0
31.5	0.001	0.002	0.001	0.001	0.0016	0.001	0.0002	0.001	0.001	0.003	0.001	0		0	0	0	0	0	0	0	0	0	0	0	0			0	0	0	0	0	0	0	0	0	0	0	0			0	0	0	0	0	0	0	0
33	0.001	0.002	0.002	0.001	0.0016	0.001	0.0012	0.001	0.001	0.003	0.001	0.001		0	0	0	0	0	0	0	0	0	0	0	0			0	0	0	0	0	0	0	0	0	0	0	0			0	0	0	0	0	0	0	0
34.5	0.001	0.001	0.001	0.001	0.0016	0.001	0.0002	0.001	0.001	0.004	0.001	0		0	0	0	0	0	0	0	0	0	0	0	0			0	0	0	0	0	0	0	0	0	0	0	0			0	0	0	0	0	0	0	0
36	0.001	0.002	0.001	0.001	0.0016	0.001	0.0002	0.001	0.001	0.005	0.001	0.001		0	0	0	0	0	0	0	0	0	0	0	0			0	0	0	0	0	0	0	0	0	0	0	0			0	0	0	0	0	0	0	0
37.5	0.001	0.002	0.001	0.001	0.0016	0.001	0.0012	0.001	0.001	0.005	0.001	0		0	0	0	0	0	0	0	0	0	0	0	0			0	0	0	0	0	0	0	0	0	0	0	0			0	0	0	0	0	0	0	0
39	0.001	0.002	0.001	0.001	0.0026	0.001	0.0002	0.001	0.001	0.005	0.001	0		0	0	0	0	0	0	0	0	0	0	0	0			0	0	0	0	0	0	0	0	0	0	0	0			0	0	0	0	0	0	0	0
40.5	0.002	0.002	0.002	0.001	0.0016	0.002	0.0012	0.001	0.001	0.006	0.001	0.001		0	0	0	0	0	0	0	0	0	0	0	0			0	0	0	0	0	0	0	0	0	0	0	0			0	0	0	0	0	0	0	0
42	0.002	0.002	0.002	0.001	0.0026	0.001	0.0012	0.001	0.001	0.006	0.001	0		0	0	0	0	0	0	0	0	0	0	0	0			0	0	0	0	0	0	0	0	0	0	0	0			0	0	0	0	0	0	0	0
43.5	0.002	0.002	0.002	0.001	0.0026	0.001	0.0012	0.001	0.001	0.006	0.001	0.001		0	0	0	0	0	0	0	0	0	0	0	0			0	0	0	0	0	0	0	0	0	0	0	0			0	0	0	0	0	0	0	0
45	0.002	0.002	0.002	0.002	0.0026	0.001	0.0012	0.001	0.001	0.006	0.001	0		0	0	0	0	0	0	0	0	0	0	0	0			0	0	0	0	0	0	0	0	0	0	0	0			0	0	0	0	0	0	0	0
46.5	0.002	0.002	0.002	0.001	0.0026	0.001	0.0012	0.001	0.001	0.006	0.001	0.001		0	0	0	0	0	0	0	0	0	0	0	0			0	0	0	0	0	0	0	0	0	0	0	0			0	0	0	0	0	0	0	0
48	0.002	0.002	0.002	0.002	0.0026	0.002	0.0012	0.001	0.001	0.006	0.001	0.001		0	0	0	0	0	0	0	0	0	0	0	0			0	0	0	0	0	0	0	0	0	0	0	0			0	0	0	0	0	0	0	0
49.5	0.002	0.002	0.002	0.001	0.0016	0.001	0.0012	0.001	0.001	0.006	0.001	0.001		0	0	0	0	0	0	0	0	0	0	0	0			0	0	0	0	0	0	0	0	0	0	0	0			0	0	0	0	0	0	0	0
51	0.002	0.002	0.002	0.002	0.0026	0.001	0.0012	0.001	0.001	0.006	0.001	0.001		0	0	0	0	0	0	0	0	0	0	0	0			0	0	0	0	0	0	0	0	0	0	0	0			0	0	0	0	0	0	0	0
52.5	0.002	0.002	0.002	0.002	0.0026	0.001	0.0012	0.001	0.002	0.006	0.001	0.001		0	0	0	0	0	0	0	0	0	0	0	0			0	0	0	0	0	0	0	0	0	0	0	0			0	0	0	0	0	0	0	0
54	0.002	0.002	0.002	0.002	0.0026	0.002	0.0012	0.001	0.001	0.006	0.001	0.001		0	0	0	0	0	0	0	0	0	0	0	0			0	0	0	0	0	0	0	0	0	0	0	0			0	0	0	0	0	0	0	0
55.5	0.002	0.002	0.002	0.002	0.0026	0.002	0.0012	0.001	0.002	0.006	0.001	0.001		0	0	0	0	0	0	0	0	0	0	0	0			0	0	0	0	0	0	0	0	0	0	0	0			0	0	0	0	0	0	0	0
57	0.002	0.002	0.002	0.002	0.0026	0.002	0.0012	0.001	0.002	0.006	0.002	0.001		0	0	0	0	0	0	0	0	0	0	0	0			0	0	0	0	0	0	0	0	0	0	0	0			0	0	0	0	0	0	0	0
58.5	0.002	0.003	0.003	0.002	0.0026	0.002	0.0012	0.002	0.002	0.006	0.001	0.001		0	0	0	0	0	0	0	0	0	0	0	0			0	0	0	0	0	0	0	0	0	0	0	0			0	0	0	0	0	0	0	0
60	0.002	0.002	0.002	0.001	0.0026	0.001	0.0012	0.001	0.001	0.006	0.001	0		0	0	0	0	0	0	0	0	0	0	0	0			0	0	0	0	0	0	0	0	0	0	0	0			0	0	0	0	0	0	0	0
61.5	0.002	0.003	0.002	0.002	0.0026	0.002	0.0012	0.001	0.002	0.006	0.001	0.001		0	0	0	0	0	0	0	0	0	0	0	0			0	0	0	0	0	0	0	0	0	0	0	0			0	0	0	0	0	0	0	0
63	0.002	0.002	0.002	0.002	0.0026	0.002	0.0012	0.001	0.002	0.006	0.001	0		0	0	0	0	0	0	0	0	0	0	0	0			0	0	0	0	0	0	0	0	0	0	0	0			0	0	0	0	0	0	0	0
64.5	0.003	0.003	0.003	0.002	0.0026	0.002	0.0022	0.002	0.002	0.006	0.002	0.001		0	0	0	0	0	0	0	0	0	0	0	0			0	0	0	0	0	0	0	0	0	0	0	0			0	0	0	0	0	0	0	0
66	0.002	0.003	0.003	0.002	0.0026	0.002	0.0022	0.002	0.002	0.006	0.002	0.001		0	0	0	0	0	0	0	0	0	0	0	0			0	0	0	0	0	0	0	0	0	0	0	0			0	0	0	0	0	0	0	0
67.5	0.002	0.003	0.003	0.002	0.0026	0.002	0.0012	0.002	0.002	0.006	0.002	0.001		0	0	0	0	0	0	0	0	0	0	0	0			0	0	0	0	0	0	0	0	0	0	0	0			0	0	0	0	0	0	0	0
69	0.002	0.003	0.003	0.002	0.0026	0.002	0.0022	0.002	0.002	0.006	0.002	0.001		0	0	0	0	0	0	0	0	0	0	0	0			0	0	0	0	0	0	0	0	0	0	0	0			0	0	0	0	0	0	0	0
70.5	0.002	0.002	0.003	0.002	0.0026	0.002	0.0012	0.001	0.001	0.006	0.002	0.001		0	0	0	0	0	0	0	0	0	0	0	0			0	0	0	0	0	0	0	0	0	0	0	0			0	0	0	0	0	0	0	0
72	0.002	0.003	0.003	0.002	0.0026	0.002	0.0012	0.002	0.002	0.006	0.001	0.001		0	0	0	0	0	0	0	0	0	0	0	0			0	0	0	0	0	0	0	0	0	0	0	0			0	0	0	0	0	0	0	0
73.5	0.003	0.003	0.003	0.002	0.0026	0.002	0.0012	0.002	0.002	0.006	0.002	0.001		0	0	0	0	0	0	0	0	0	0	0	0			0	0	0	0	0	0	0	0	0	0	0	0			0	0	0	0	0	0	0	0
75	0.003	0.003	0.003	0.002	0.0026	0.002	0.0022	0.002	0.002	0.006	0.002	0.001		0	0	0	0	0	0	0	0	0	0	0	0			0	0	0	0	0	0	0	0	0	0	0	0			0	0	0	0	0	0	0	0
76.5	0.002	0.003	0.003	0.002	0.0026	0.002	0.0022	0.002	0.002	0.006	0.002	0.001		0	0	0	0	0	0	0	0	0	0	0	0			0	0	0	0	0	0	0	0	0	0	0	0			0	0	0	0	0	0	0	0
78	0.003	0.003	0.003	0.002	0.0026	0.002	0.0012	0.001	0.002	0.006	0.002	0.001		0	0	0	0	0	0	0	0	0	0	0	0			0	0	0	0	0	0	0	0	0	0	0	0			0	0	0	0	0	0	0	0
79.5	0.003	0.003	0.003	0.002	0.0026	0.002	0.0022	0.002	0.002	0.006	0.002	0.001		0	0	0	0	0	0	0	0	0	0	0	0			0	0	0	0	0	0	0	0	0	0	0	0			0	0	0	0	0	0	0	0
81	0.003	0.003	0.003	0.002	0.0026	0.002	0.0012	0.001	0.002	0.006	0.001	0.001		0	0	0	0	0	0	0	0	0	0	0	0			0	0	0	0	0	0	0	0	0	0	0	0			0	0	0	0	0	0	0	0
82.5	0.003	0.003	0.003	0.003	0.0026	0.002	0.0022	0.002	0.002	0.006	0.002	0.001		0	0	0	0	0	0	0	0	0	0	0	0			0	0	0	0	0	0	0	0	0	0	0	0			0	0	0	0	0	0	0	0
84	0.003	0.003	0.003	0.003	0.0036	0.002	0.0022	0.002	0.002	0.006	0.002	0.001		0	0	0	0	0	0	0	0	0	0	0	0			0	0	0	0	0	0	0	0	0	0	0	0			0	0	0	0	0	0	0	0
85.5	0.003	0.004	0.003	0.003	0.0036	0.003	0.0022	0.002	0.002	0.006	0.002	0.001		0	0	0	0	0	0	0	0	0	0	0	0			0	0	0	0	0	0	0	0	0	0	0	0			0	0	0	0	0	0	0	0
87	0.003	0.003	0.003	0.003	0.0036	0.002	0.0022	0.002	0.002	0.006	0.002	0.001		0	0	0	0	0	0	0	0	0	0	0	0			0	0	0	0	0	0	0	0	0	0	0	0			0	0	0	0	0	0	0	0
88.5	0.003	0.004	0.003	0.003	0.0036	0.002	0.0022	0.002	0.002	0.006	0.002	0.002		0	0	0	0	0	0	0	0	0	0	0	0			0	0	0	0	0	0	0	0	0	0	0	0			0	0	0	0	0	0	0	0
90	0.004	0.004	0.003	0.003	0.0036	0.002	0.0022	0.002	0.002	0.006	0.002	0.001		0	0	0	0	0	0	0	0	0	0	0	0			0	0	0	0	0	0	0	0	0	0	0	0			0	0	0	0	0	0	0	0
91.5	0.004	0.004	0.003	0.003	0.0036	0.002	0.0022	0.002	0.002	0.006	0.002	0.002		0	0	0	0	0	0	0	0	0	0	0	0			0	0	0	0	0	0	0	0	0	0	0	0			0	0	0	0	0	0	0	0
93	0.004	0.004	0.004	0.003	0.0036	0.003	0.0022	0.002	0.002	0.006	0.002	0.002		0	0	0	0	0	0	0	0	0	0	0	0			0	0	0	0	0	0	0	0	0	0	0	0			0	0	0	0	0	0	0	0
94.5	0.004	0.004	0.004	0.003	0.0036	0.002	0.0022	0.002	0.002	0.006	0.002	0.002		0	0	0	0	0	0	0	0	0	0	0	0			0	0	0	0	0	0	0	0	0	0	0	0			0	0	0	0	0	0	0	0
96	0.004	0.004	0.004	0.003	0.0036	0.002	0.0022	0.002	0.002	0.006	0.002	0.002		0	0	0	0	0	0	0	0	0	0	0	0			0	0	0	0	0	0	0	0	0	0	0	0			0	0	0	0	0	0	0	0
97.5	0.005	0.004	0.004	0.004	0.0036	0.003	0.0022	0.002	0.002	0.006	0.002	0.002		0	0	0	0	0	0	0	0	0	0	0	0			0	0	0	0	0	0	0	0	0	0	0	0			0	0	0	0	0	0	0	0
99	0.005	0.004	0.004	0.004	0.0036	0.003	0.0022	0.002	0.002	0.006	0.002	0.002		0	0	0	0	0	0	0	0	0	0	0	0			0	0	0	0	0	0	0	0	0	0	0	0			0	0	0	0	0	0	0	0
100.5	0.006	0.005	0.005	0.004	0.0046	0.003	0.0022	0.002	0.002	0.006	0.002	0.002		0	0	0	0	0	0	0	0	0	0	0	0			0	0	0	0	0	0	0	0	0	0	0	0			0	0	0	0	0	0	0	0
102	0.006	0.005	0.005	0.004	0.0056	0.003	0.0022	0.002	0.002	0.007	0.002	0.003		0	0	0	0	0	0	0	0	0	0	0	0			0	0	0	0	0	0	0	0	0	0	0	0			0	0	0	0	0	0	0	0
103.5	0.007	0.005	0.005	0.004	0.0046	0.003	0.0022	0.002	0.002	0.006	0.002	0.002		0	0	0	0	0	0	0	0	0	0	0	0			0	0	0	0	0	0	0	0	0	0	0	0			0	0	0	0	0	0	0	0
105	0.007	0.006	0.005	0.005	0.0056	0.004	0.0022	0.002	0.002	0.006	0.002	0.003		0	0	0	0	0	0	0	0	0	0	0	0			0	0	0	0	0	0	0	0	0	0	0	0			0	0	0	0	0	0	0	0
106.5	0.008	0.006	0.006	0.005	0.0056	0.004	0.0032	0.003	0.002	0.006	0.002	0.003		0	0	0	0	0	0	0	0	0	0	0	0			0	0	0	0	0	0	0	0	0	0	0	0			0	0	0	0	0	0	0	0
108	0.009	0.007	0.007	0.006	0.0066	0.004	0.0032	0.003	0.003	0.006	0.002	0.003		0	0	0	0	0	0	0	0	0	0	0	0			0	0	0	0	0	0	0	0	0	0	0	0			0	0	0	0	0	0	0	0
109.5	0.009	0.008	0.007	0.006	0.0066	0.004	0.0032	0.003	0.002	0.007	0.002	0.003		0	0	0	0	0	0	0	0	0	0	0	0			0	0	0	0	0	0	0	0	0	0	0	0			0	0	0	0	0	0	0	0
111	0.011	0.008	0.008	0.007	0.0076	0.005	0.0032	0.003	0.002	0.007	0.002	0.004		0	0	0	0	0	0	0	0	0	0	0	0			0	0	0	0	0	0	0	0	0	0	0	0			0	0	0	0	0	0	0	0
112.5	0.011	0.009	0.008	0.008	0.0086	0.006	0.0042	0.003	0.003	0.007	0.002	0.005		0	0	0	0	0	0	0	0	0	0	0	0			0	0	0	0	0	0	0	0	0	0	0	0			0	0	0	0	0	0	0	0
114	0.012	0.01	0.009	0.008	0.0086	0.006	0.0042	0.004	0.003	0.007	0.002	0.005		0	0	0	0	0	0	0	0	0	0	0	0			0	0	0	0	0	0	0	0	0	0	0	0			0	0	0	0	0	0	0	0
115.5	0.013	0.01	0.01	0.009	0.0096	0.007	0.0042	0.003	0.003	0.007	0.002	0.005		0	0	0	0	0	0	0	0	0	0	0	0			0	0	0	0	0	0	0	0	0	0	0	0			0	0	0	0	0	0	0	0
117	0.015	0.011	0.01	0.01	0.0106	0.007	0.0042	0.004	0.003	0.007	0.002	0.006		0	0	0	0	0	0	0	0	0	0	0	0			0	0	0	0	0	0	0	0	0	0	0	0			0	0	0	0	0	0	0	0
118.5	0.016	0.013	0.011	0.011	0.0116	0.008	0.0052	0.004	0.003	0.007	0.002	0.007		0	0	0	0	0	0	0	0	0	0	0	0			0	0	0	0	0	0	0	0	0	0	0	0			0	0	0	0	0	0	0	0
120	0.017	0.014	0.012	0.012	0.0126	0.008	0.0062	0.004	0.003	0.007	0.002	0.007		0	0	0	0	0	0	0	0	0	0	0	0			0	0	0	0	0	0	0	0	0	0	0	0			0	0	0	0	0	0	0	0
121.5	0.018	0.015	0.013	0.013	0.0136	0.009	0.0062	0.004	0.003	0.007	0.002	0.008		0	0	0	0	0	0	0	0	0	0	0	0			0	0	0	0	0	0	0	0	0	0	0	0			0	0	0	0	0	0	0	0
123	0.02	0.016	0.015	0.014	0.0146	0.01	0.0072	0.005	0.003	0.007	0.002	0.009		0	0	0	0	0	0	0	0	0	0	0	0			0	0	0	0	0	0	0	0	0	0	0	0			0	0	0	0	0	0	0	0
124.5	0.021	0.017	0.015	0.015	0.0156	0.011	0.0072	0.005	0.004	0.007	0.002	0.01		0	0	0	0	0	0	0	0	0	0	0	0			0	0	0	0	0	0	0	0	0	0	0	0			0	0	0	0	0	0	0	0
126	0.023	0.019	0.017	0.016	0.0176	0.012	0.0082	0.006	0.004	0.007	0.002	0.011		0	0	0	0	0	0	0	0	0	0	0	0			0	0	0	0	0	0	0	0	0	0	0	0			0	0	0	0	0	0	0	0
127.5	0.025	0.02	0.019	0.018	0.0186	0.013	0.0092	0.006	0.005	0.008	0.003	0.013		0	0	0	0	0	0	0	0	0	0	0	0			0	0	0	0	0	0	0	0	0	0	0	0			0	0	0	0	0	0	0	0
129	0.026	0.021	0.019	0.019	0.0196	0.014	0.0092	0.007	0.004	0.007	0.002	0.014		0	0	0	0	0	0	0	0	0	0	0	0			0	0	0	0	0	0	0	0	0	0	0	0			0	0	0	0	0	0	0	0
130.5	0.029	0.023	0.021	0.021	0.0216	0.015	0.0112	0.007	0.005	0.008	0.002	0.015		0	0	0	0	0	0	0	0	0	0	0	0			0	0	0	0	0	0	0	0	0	0	0	0			0	0	0	0	0	0	0	0
132	0.031	0.024	0.023	0.022	0.0226	0.016	0.0112	0.008	0.005	0.008	0.003	0.017		0	0	0	0	0	0	0	0	0	0	0	0			0	0	0	0	0	0	0	0	0	0	0	0			0	0	0	0	0	0	0	0
133.5	0.034	0.026	0.024	0.024	0.0236	0.017	0.0122	0.008	0.005	0.008	0.003	0.019		0	0	0	0	0	0	0	0	0	0	0	0			0	0	0	0	0	0	0	0	0	0	0	0			0	0	0	0	0	0	0	0
135	0.036	0.028	0.026	0.026	0.0256	0.019	0.0132	0.009	0.006	0.008	0.003	0.02		0	0	0	0	0	0	0	0	0	0	0	0			0	0	0	0	0	0	0	0	0	0	0	0			0	0	0	0	0	0	0	0
136.5	0.038	0.03	0.028	0.028	0.0266	0.02	0.0142	0.01	0.007	0.008	0.003	0.022		0	0	0	0	0	0	0	0	0	0	0	0			0	0	0	0	0	0	0	0	0	0	0	0			0	0	0	0	0	0	0	0
138	0.04	0.032	0.028	0.029	0.0276	0.022	0.0162	0.011	0.007	0.009	0.003	0.024		0	0	0	0	0	0	0	0	0	0	0	0			0	0	0	0	0	0	0	0	0	0	0	0			0	0	0	0	0	0	0	0
139.5	0.041	0.034	0.031	0.031	0.0296	0.023	0.0162	0.011	0.007	0.009	0.003	0.025		0	0	0	0	0	0	0	0	0	0	0	0			0	0	0	0	0	0	0	0	0	0	0	0			0	0	0	0	0	0	0	0
141	0.043	0.036	0.033	0.033	0.0326	0.025	0.0172	0.012	0.008	0.009	0.003	0.028		0	0	0	0	0	0	0	0	0	0	0	0			0	0	0	0	0	0	0	0	0	0	0	0			0	0	0	0	0	0	0	0
142.5	0.045	0.038	0.035	0.034	0.0346	0.027	0.0192	0.014	0.009	0.01	0.004	0.031		1	0	0	0	0	0	0	0	0	0	0	0			0.045	0	0	0	0	0	0	0	0	0	0	0			98	0	0	0	0	0	0	0
144	0.048	0.04	0.037	0.037	0.0366	0.029	0.0202	0.015	0.009	0.01	0.004	0.033		1	0	0	0	0	0	0	0	0	0	0	0			0.048	0	0	0	0	0	0	0	0	0	0	0			99	0	0	0	0	0	0	0
145.5	0.051	0.042	0.039	0.039	0.0396	0.03	0.0212	0.015	0.009	0.01	0.004	0.035		1	0	0	0	0	0	0	0	0	0	0	0			0.051	0	0	0	0	0	0	0	0	0	0	0			100	0	0	0	0	0	0	0
147	0.053	0.045	0.041	0.041	0.0426	0.032	0.0242	0.017	0.011	0.011	0.004	0.038		1	1	0	0	0	0	0	0	0	0	0	0			0.053	0.045	0	0	0	0	0	0	0	0	0	0			101	101	0	0	0	0	0	0
148.5	0.055	0.047	0.041	0.043	0.0436	0.034	0.0252	0.018	0.011	0.011	0.004	0.04		1	1	0	0	0	0	0	0	0	0	0	0			0.055	0.047	0	0	0	0	0	0	0	0	0	0			102	102	0	0	0	0	0	0
150	0.058	0.048	0.045	0.045	0.0446	0.035	0.0262	0.019	0.012	0.011	0.004	0.043		1	1	1	1	0	0	0	0	0	0	0	0			0.058	0.048	0.045	0.045	0	0	0	0	0	0	0	0			103	103	103	103	0	0	0	0
151.5	0.06	0.052	0.047	0.047	0.0486	0.038	0.0282	0.02	0.013	0.012	0.005	0.046		1	1	1	1	1	0	0	0	0	0	0	1			0.06	0.052	0.047	0.047	0.0486	0	0	0	0	0	0	0.046			104	104	104	104	104	0	0	0
153	0.064	0.054	0.049	0.049	0.0506	0.04	0.0302	0.022	0.014	0.013	0.005	0.048		1	1	1	1	1	0	0	0	0	0	0	1			0.064	0.054	0.049	0.049	0.0506	0	0	0	0	0	0	0.048			105	105	105	105	105	0	0	0
154.5	0.065	0.055	0.053	0.053	0.0536	0.042	0.0312	0.023	0.015	0.013	0.005	0.051		1	1	1	1	1	0	0	0	0	0	0	1			0.065	0.055	0.053	0.053	0.0536	0	0	0	0	0	0	0.051			106	106	106	106	106	0	0	0
156	0.069	0.059	0.054	0.055	0.0556	0.044	0.0332	0.024	0.016	0.014	0.006	0.054		1	1	1	1	1	0	0	0	0	0	0	1			0.069	0.059	0.054	0.055	0.0556	0	0	0	0	0	0	0.054			107	107	107	107	107	0	0	0
157.5	0.071	0.061	0.056	0.057	0.0586	0.046	0.0342	0.026	0.017	0.014	0.006	0.056		1	1	1	1	1	1	0	0	0	0	0	1			0.071	0.061	0.056	0.057	0.0586	0.046	0	0	0	0	0	0.056			108	108	108	108	108	108	0	0
159	0.074	0.063	0.059	0.059	0.0606	0.049	0.0362	0.027	0.018	0.015	0.006	0.059		1	1	1	1	1	1	0	0	0	0	0	1			0.074	0.063	0.059	0.059	0.0606	0.049	0	0	0	0	0	0.059			109	109	109	109	109	109	0	0
160.5	0.075	0.068	0.063	0.062	0.0626	0.05	0.0382	0.028	0.019	0.016	0.007	0.062		1	1	1	1	1	1	0	0	0	0	0	1			0.075	0.068	0.063	0.062	0.0626	0.05	0	0	0	0	0	0.062			110	110	110	110	110	110	0	0
162	0.079	0.069	0.066	0.064	0.0646	0.053	0.0402	0.031	0.02	0.017	0.007	0.064		1	1	1	1	1	1	0	0	0	0	0	1			0.079	0.069	0.066	0.064	0.0646	0.053	0	0	0	0	0	0.064			111	111	111	111	111	111	0	0
163.5	0.082	0.07	0.067	0.066	0.0676	0.055	0.0422	0.032	0.021	0.017	0.008	0.068		1	1	1	1	1	1	0	0	0	0	0	1			0.082	0.07	0.067	0.066	0.0676	0.055	0	0	0	0	0	0.068			112	112	112	112	112	112	0	0
165	0.085	0.075	0.07	0.069	0.0706	0.058	0.0442	0.034	0.022	0.018	0.008	0.071		1	1	1	1	1	1	0	0	0	0	0	1			0.085	0.075	0.07	0.069	0.0706	0.058	0	0	0	0	0	0.071			113	113	113	113	113	113	0	0
166.5	0.085	0.077	0.072	0.071	0.0736	0.06	0.0462	0.035	0.023	0.019	0.008	0.074		1	1	1	1	1	1	1	0	0	0	0	1			0.085	0.077	0.072	0.071	0.0736	0.06	0.0462	0	0	0	0	0.074			114	114	114	114	114	114	114	0
168	0.088	0.078	0.076	0.074	0.0766	0.063	0.0482	0.037	0.026	0.019	0.009	0.077		1	1	1	1	1	1	1	0	0	0	0	1			0.088	0.078	0.076	0.074	0.0766	0.063	0.0482	0	0	0	0	0.077			115	115	115	115	115	115	115	0
169.5	0.092	0.081	0.078	0.078	0.0796	0.065	0.0502	0.039	0.027	0.021	0.01	0.08		1	1	1	1	1	1	1	0	0	0	0	1			0.092	0.081	0.078	0.078	0.0796	0.065	0.0502	0	0	0	0	0.08			116	116	116	116	116	116	116	0
171	0.096	0.086	0.081	0.08	0.0816	0.067	0.0512	0.041	0.028	0.022	0.011	0.083		1	1	1	1	1	1	1	0	0	0	0	1			0.096	0.086	0.081	0.08	0.0816	0.067	0.0512	0	0	0	0	0.083			117	117	117	117	117	117	117	0
172.5	0.096	0.087	0.083	0.083	0.0846	0.07	0.0542	0.043	0.03	0.023	0.011	0.086		1	1	1	1	1	1	1	0	0	0	0	1			0.096	0.087	0.083	0.083	0.0846	0.07	0.0542	0	0	0	0	0.086			118	118	118	118	118	118	118	0
174	0.098	0.089	0.086	0.086	0.0856	0.072	0.0562	0.044	0.031	0.024	0.012	0.089		1	1	1	1	1	1	1	0	0	0	0	1			0.098	0.089	0.086	0.086	0.0856	0.072	0.0562	0	0	0	0	0.089			119	119	119	119	119	119	119	0
175.5	0.1	0.092	0.087	0.089	0.0896	0.074	0.0592	0.047	0.032	0.025	0.012	0.092		1	1	1	1	1	1	1	1	0	0	0	1			0.1	0.092	0.087	0.089	0.0896	0.074	0.0592	0.047	0	0	0	0.092			120	120	120	120	120	120	120	120
177	0.104	0.096	0.09	0.089	0.0926	0.076	0.0602	0.049	0.034	0.026	0.013	0.095		1	1	1	1	1	1	1	1	0	0	0	1			0.104	0.096	0.09	0.089	0.0926	0.076	0.0602	0.049	0	0	0	0.095			121	121	121	121	121	121	121	121
178.5	0.108	0.097	0.093	0.091	0.0946	0.078	0.0632	0.05	0.036	0.027	0.014	0.096		1	1	1	1	1	1	1	1	0	0	0	1			0.108	0.097	0.093	0.091	0.0946	0.078	0.0632	0.05	0	0	0	0.096			122	122	122	122	122	122	122	122
180	0.11	0.099	0.095	0.095	0.0976	0.08	0.0652	0.052	0.037	0.028	0.014	0.1		1	1	1	1	1	1	1	1	0	0	0	1			0.11	0.099	0.095	0.095	0.0976	0.08	0.0652	0.052	0	0	0	0.1			123	123	123	123	123	123	123	123
181.5	0.111	0.103	0.096	0.098	0.1016	0.083	0.0672	0.055	0.039	0.03	0.015	0.103		1	1	1	1	1	1	1	1	0	0	0	1			0.111	0.103	0.096	0.098	0.1016	0.083	0.0672	0.055	0	0	0	0.103			124	124	124	124	124	124	124	124
183	0.116	0.107	0.099	0.099	0.1036	0.086	0.0682	0.057	0.04	0.031	0.016	0.105		1	1	1	1	1	1	1	1	0	0	0	1			0.116	0.107	0.099	0.099	0.1036	0.086	0.0682	0.057	0	0	0	0.105			125	125	125	125	125	125	125	125
184.5	0.119	0.109	0.105	0.102	0.1056	0.091	0.0722	0.059	0.042	0.032	0.017	0.11		1	1	1	1	1	1	1	1	0	0	0	1			0.119	0.109	0.105	0.102	0.1056	0.091	0.0722	0.059	0	0	0	0.11			126	126	126	126	126	126	126	126
186	0.12	0.11	0.107	0.105	0.1076	0.092	0.0752	0.06	0.043	0.033	0.018	0.112		1	1	1	1	1	1	1	1	0	0	0	1			0.12	0.11	0.107	0.105	0.1076	0.092	0.0752	0.06	0	0	0	0.112			127	127	127	127	127	127	127	127
187.5	0.122	0.113	0.108	0.109	0.1116	0.091	0.0752	0.062	0.045	0.034	0.019	0.115		1	1	1	1	1	1	1	1	1	0	0	1			0.122	0.113	0.108	0.109	0.1116	0.091	0.0752	0.062	0.045	0	0	0.115			128	128	128	128	128	128	128	128
189	0.126	0.116	0.109	0.11	0.1146	0.095	0.0782	0.064	0.047	0.036	0.02	0.116		1	1	1	1	1	1	1	1	1	0	0	1			0.126	0.116	0.109	0.11	0.1146	0.095	0.0782	0.064	0.047	0	0	0.116			129	129	129	129	129	129	129	129
190.5	0.127	0.12	0.114	0.113	0.1136	0.099	0.0822	0.066	0.048	0.037	0.021	0.12		1	1	1	1	1	1	1	1	1	0	0	1			0.127	0.12	0.114	0.113	0.1136	0.099	0.0822	0.066	0.048	0	0	0.12			130	130	130	130	130	130	130	130
192	0.128	0.124	0.117	0.116	0.1156	0.1	0.0832	0.068	0.051	0.038	0.022	0.122		1	1	1	1	1	1	1	1	1	0	0	1			0.128	0.124	0.117	0.116	0.1156	0.1	0.0832	0.068	0.051	0	0	0.122			131	131	131	131	131	131	131	131
193.5	0.131	0.123	0.119	0.118	0.1196	0.105	0.0832	0.07	0.051	0.04	0.023	0.126		1	1	1	1	1	1	1	1	1	0	0	1			0.131	0.123	0.119	0.118	0.1196	0.105	0.0832	0.07	0.051	0	0	0.126			132	132	132	132	132	132	132	132
195	0.137	0.122	0.123	0.121	0.1236	0.108	0.0872	0.073	0.054	0.042	0.024	0.128		1	1	1	1	1	1	1	1	1	0	0	1			0.137	0.122	0.123	0.121	0.1236	0.108	0.0872	0.073	0.054	0	0	0.128			133	133	133	133	133	133	133	133
196.5	0.133	0.129	0.125	0.124	0.1256	0.109	0.0902	0.075	0.057	0.043	0.025	0.13		1	1	1	1	1	1	1	1	1	0	0	1			0.133	0.129	0.125	0.124	0.1256	0.109	0.0902	0.075	0.057	0	0	0.13			134	134	134	134	134	134	134	134
198	0.136	0.131	0.127	0.128	0.1256	0.112	0.0932	0.077	0.058	0.044	0.026	0.134		1	1	1	1	1	1	1	1	1	0	0	1			0.136	0.131	0.127	0.128	0.1256	0.112	0.0932	0.077	0.058	0	0	0.134			135	135	135	135	135	135	135	135
199.5	0.142	0.132	0.133	0.13	0.1266	0.114	0.0962	0.079	0.059	0.046	0.027	0.135		1	1	1	1	1	1	1	1	1	1	0	1			0.142	0.132	0.133	0.13	0.1266	0.114	0.0962	0.079	0.059	0.046	0	0.135			136	136	136	136	136	136	136	136
201	0.144	0.135	0.129	0.13	0.1306	0.117	0.0982	0.081	0.06	0.047	0.028	0.139		1	1	1	1	1	1	1	1	1	1	0	1			0.144	0.135	0.129	0.13	0.1306	0.117	0.0982	0.081	0.06	0.047	0	0.139			137	137	137	137	137	137	137	137
202.5	0.146	0.136	0.13	0.132	0.1336	0.118	0.1002	0.083	0.062	0.049	0.029	0.139		1	1	1	1	1	1	1	1	1	1	0	1			0.146	0.136	0.13	0.132	0.1336	0.118	0.1002	0.083	0.062	0.049	0	0.139			138	138	138	138	138	138	138	138
204	0.148	0.14	0.137	0.134	0.1316	0.121	0.1022	0.086	0.065	0.051	0.03	0.142		1	1	1	1	1	1	1	1	1	1	0	1			0.148	0.14	0.137	0.134	0.1316	0.121	0.1022	0.086	0.065	0.051	0	0.142			139	139	139	139	139	139	139	139
205.5	0.151	0.144	0.143	0.138	0.1326	0.123	0.1032	0.087	0.066	0.053	0.032	0.145		1	1	1	1	1	1	1	1	1	1	0	1			0.151	0.144	0.143	0.138	0.1326	0.123	0.1032	0.087	0.066	0.053	0	0.145			140	140	140	140	140	140	140	140
207	0.152	0.147	0.144	0.14	0.1416	0.125	0.1042	0.089	0.068	0.053	0.033	0.147		1	1	1	1	1	1	1	1	1	1	0	1			0.152	0.147	0.144	0.14	0.1416	0.125	0.1042	0.089	0.068	0.053	0	0.147			141	141	141	141	141	141	141	141
208.5	0.154	0.151	0.146	0.144	0.1456	0.128	0.1072	0.092	0.071	0.055	0.034	0.149		1	1	1	1	1	1	1	1	1	1	0	1			0.154	0.151	0.146	0.144	0.1456	0.128	0.1072	0.092	0.071	0.055	0	0.149			142	142	142	142	142	142	142	142
210	0.155	0.15	0.144	0.144	0.1476	0.131	0.1102	0.095	0.071	0.057	0.036	0.154		1	1	1	1	1	1	1	1	1	1	0	1			0.155	0.15	0.144	0.144	0.1476	0.131	0.1102	0.095	0.071	0.057	0	0.154			143	143	143	143	143	143	143	143
211.5	0.159	0.153	0.144	0.146	0.1516	0.134	0.1092	0.097	0.074	0.057	0.037	0.158		1	1	1	1	1	1	1	1	1	1	0	1			0.159	0.153	0.144	0.146	0.1516	0.134	0.1092	0.097	0.074	0.057	0	0.158			144	144	144	144	144	144	144	144
213	0.16	0.154	0.153	0.152	0.1546	0.135	0.1112	0.098	0.076	0.059	0.038	0.16		1	1	1	1	1	1	1	1	1	1	0	1			0.16	0.154	0.153	0.152	0.1546	0.135	0.1112	0.098	0.076	0.059	0	0.16			145	145	145	145	145	145	145	145
214.5	0.162	0.155	0.154	0.155	0.1546	0.138	0.1142	0.099	0.076	0.06	0.039	0.16		1	1	1	1	1	1	1	1	1	1	0	1			0.162	0.155	0.154	0.155	0.1546	0.138	0.1142	0.099	0.076	0.06	0	0.16			146	146	146	146	146	146	146	146
216	0.16	0.159	0.156	0.156	0.1556	0.141	0.1172	0.101	0.077	0.062	0.041	0.163		1	1	1	1	1	1	1	1	1	1	0	1			0.16	0.159	0.156	0.156	0.1556	0.141	0.1172	0.101	0.077	0.062	0	0.163			147	147	147	147	147	147	147	147
217.5	0.163	0.164	0.158	0.158	0.1596	0.142	0.1192	0.103	0.08	0.064	0.042	0.167		1	1	1	1	1	1	1	1	1	1	0	1			0.163	0.164	0.158	0.158	0.1596	0.142	0.1192	0.103	0.08	0.064	0	0.167			148	148	148	148	148	148	148	148
219	0.167	0.166	0.156	0.162	0.1626	0.142	0.1202	0.104	0.081	0.065	0.044	0.169		1	1	1	1	1	1	1	1	1	1	0	1			0.167	0.166	0.156	0.162	0.1626	0.142	0.1202	0.104	0.081	0.065	0	0.169			149	149	149	149	149	149	149	149
220.5	0.171	0.167	0.162	0.167	0.1656	0.147	0.1242	0.106	0.082	0.067	0.045	0.169		1	1	1	1	1	1	1	1	1	1	1	1			0.171	0.167	0.162	0.167	0.1656	0.147	0.1242	0.106	0.082	0.067	0.045	0.169			150	150	150	150	150	150	150	150
222	0.18	0.169	0.166	0.163	0.1666	0.152	0.1252	0.11	0.085	0.069	0.047	0.172		1	1	1	1	1	1	1	1	1	1	1	1			0.18	0.169	0.166	0.163	0.1666	0.152	0.1252	0.11	0.085	0.069	0.047	0.172			151	151	151	151	151	151	151	151
223.5	0.181	0.171	0.165	0.162	0.1696	0.15	0.1262	0.111	0.086	0.07	0.048	0.173		1	1	1	1	1	1	1	1	1	1	1	1			0.181	0.171	0.165	0.162	0.1696	0.15	0.1262	0.111	0.086	0.07	0.048	0.173			152	152	152	152	152	152	152	152
225	0.18	0.177	0.166	0.163	0.1726	0.148	0.1282	0.114	0.088	0.071	0.049	0.172		1	1	1	1	1	1	1	1	1	1	1	1			0.18	0.177	0.166	0.163	0.1726	0.148	0.1282	0.114	0.088	0.071	0.049	0.172			153	153	153	153	153	153	153	153
226.5	0.182	0.173	0.171	0.166	0.1726	0.155	0.1322	0.117	0.09	0.073	0.051	0.176		1	1	1	1	1	1	1	1	1	1	1	1			0.182	0.173	0.171	0.166	0.1726	0.155	0.1322	0.117	0.09	0.073	0.051	0.176			154	154	154	154	154	154	154	154
228	0.189	0.173	0.176	0.168	0.1716	0.157	0.1332	0.119	0.092	0.074	0.052	0.183		1	1	1	1	1	1	1	1	1	1	1	1			0.189	0.173	0.176	0.168	0.1716	0.157	0.1332	0.119	0.092	0.074	0.052	0.183			155	155	155	155	155	155	155	155
229.5	0.19	0.171	0.177	0.173	0.1746	0.157	0.1372	0.119	0.093	0.076	0.053	0.181		1	1	1	1	1	1	1	1	1	1	1	1			0.19	0.171	0.177	0.173	0.1746	0.157	0.1372	0.119	0.093	0.076	0.053	0.181			156	156	156	156	156	156	156	156
231	0.188	0.173	0.178	0.177	0.1766	0.158	0.1382	0.121	0.094	0.077	0.054	0.184		1	1	1	1	1	1	1	1	1	1	1	1			0.188	0.173	0.178	0.177	0.1766	0.158	0.1382	0.121	0.094	0.077	0.054	0.184			157	157	157	157	157	157	157	157
232.5	0.192	0.178	0.182	0.182	0.1796	0.158	0.1382	0.123	0.096	0.08	0.055	0.189		1	1	1	1	1	1	1	1	1	1	1	1			0.192	0.178	0.182	0.182	0.1796	0.158	0.1382	0.123	0.096	0.08	0.055	0.189			158	158	158	158	158	158	158	158
234	0.192	0.185	0.187	0.186	0.1786	0.163	0.1402	0.125	0.099	0.079	0.057	0.19		1	1	1	1	1	1	1	1	1	1	1	1			0.192	0.185	0.187	0.186	0.1786	0.163	0.1402	0.125	0.099	0.079	0.057	0.19			159	159	159	159	159	159	159	159
235.5	0.199	0.184	0.19	0.189	0.1836	0.164	0.1412	0.128	0.101	0.082	0.059	0.191		1	1	1	1	1	1	1	1	1	1	1	1			0.199	0.184	0.19	0.189	0.1836	0.164	0.1412	0.128	0.101	0.082	0.059	0.191			160	160	160	160	160	160	160	160
237	0.198	0.182	0.188	0.19	0.1896	0.166	0.1422	0.13	0.102	0.083	0.06	0.194		1	1	1	1	1	1	1	1	1	1	1	1			0.198	0.182	0.188	0.19	0.1896	0.166	0.1422	0.13	0.102	0.083	0.06	0.194			161	161	161	161	161	161	161	161
238.5	0.201	0.187	0.191	0.189	0.1926	0.17	0.1472	0.13	0.103	0.085	0.062	0.192		1	1	1	1	1	1	1	1	1	1	1	1			0.201	0.187	0.191	0.189	0.1926	0.17	0.1472	0.13	0.103	0.085	0.062	0.192			162	162	162	162	162	162	162	162
240	0.202	0.194	0.191	0.195	0.1906	0.172	0.1452	0.133	0.105	0.086	0.064	0.198		1	1	1	1	1	1	1	1	1	1	1	1			0.202	0.194	0.191	0.195	0.1906	0.172	0.1452	0.133	0.105	0.086	0.064	0.198			163	163	163	163	163	163	163	163
241.5	0.202	0.194	0.194	0.199	0.1906	0.173	0.1452	0.131	0.107	0.088	0.066	0.195		1	1	1	1	1	1	1	1	1	1	1	1			0.202	0.194	0.194	0.199	0.1906	0.173	0.1452	0.131	0.107	0.088	0.066	0.195			164	164	164	164	164	164	164	164
243	0.21	0.2	0.201	0.198	0.1926	0.176	0.1512	0.134	0.109	0.091	0.065	0.197		1	1	1	1	1	1	1	1	1	1	1	1			0.21	0.2	0.201	0.198	0.1926	0.176	0.1512	0.134	0.109	0.091	0.065	0.197			165	165	165	165	165	165	165	165
244.5	0.209	0.205	0.202	0.195	0.1976	0.176	0.1532	0.134	0.109	0.09	0.067	0.201		1	1	1	1	1	1	1	1	1	1	1	1			0.209	0.205	0.202	0.195	0.1976	0.176	0.1532	0.134	0.109	0.09	0.067	0.201			166	166	166	166	166	166	166	166
246	0.211	0.207	0.2	0.193	0.2026	0.176	0.1512	0.138	0.111	0.093	0.068	0.202		1	1	1	1	1	1	1	1	1	1	1	1			0.211	0.207	0.2	0.193	0.2026	0.176	0.1512	0.138	0.111	0.093	0.068	0.202			167	167	167	167	167	167	167	167
247.5	0.209	0.208	0.204	0.196	0.2036	0.178	0.1512	0.139	0.112	0.096	0.069	0.206		1	1	1	1	1	1	1	1	1	1	1	1			0.209	0.208	0.204	0.196	0.2036	0.178	0.1512	0.139	0.112	0.096	0.069	0.206			168	168	168	168	168	168	168	168
249	0.21	0.209	0.204	0.2	0.2036	0.182	0.1542	0.144	0.115	0.096	0.071	0.204		1	1	1	1	1	1	1	1	1	1	1	1			0.21	0.209	0.204	0.2	0.2036	0.182	0.1542	0.144	0.115	0.096	0.071	0.204			169	169	169	169	169	169	169	169
250.5	0.217	0.205	0.208	0.206	0.2056	0.182	0.1582	0.145	0.113	0.098	0.072	0.209		1	1	1	1	1	1	1	1	1	1	1	1			0.217	0.205	0.208	0.206	0.2056	0.182	0.1582	0.145	0.113	0.098	0.072	0.209			170	170	170	170	170	170	170	170
252	0.217	0.206	0.202	0.208	0.2136	0.188	0.1602	0.144	0.115	0.1	0.073	0.21		1	1	1	1	1	1	1	1	1	1	1	1			0.217	0.206	0.202	0.208	0.2136	0.188	0.1602	0.144	0.115	0.1	0.073	0.21			171	171	171	171	171	171	171	171
253.5	0.216	0.213	0.209	0.207	0.2136	0.192	0.1602	0.146	0.118	0.102	0.074	0.218		1	1	1	1	1	1	1	1	1	1	1	1			0.216	0.213	0.209	0.207	0.2136	0.192	0.1602	0.146	0.118	0.102	0.074	0.218			172	172	172	172	172	172	172	172
255	0.213	0.215	0.208	0.213	0.2166	0.194	0.1622	0.149	0.122	0.104	0.075	0.219		1	1	1	1	1	1	1	1	1	1	1	1			0.213	0.215	0.208	0.213	0.2166	0.194	0.1622	0.149	0.122	0.104	0.075	0.219			173	173	173	173	173	173	173	173
256.5	0.217	0.216	0.215	0.217	0.2116	0.195	0.1652	0.15	0.124	0.104	0.077	0.214		1	1	1	1	1	1	1	1	1	1	1	1			0.217	0.216	0.215	0.217	0.2116	0.195	0.1652	0.15	0.124	0.104	0.077	0.214			174	174	174	174	174	174	174	174
258	0.217	0.213	0.216	0.212	0.2146	0.198	0.1662	0.152	0.124	0.106	0.078	0.218		1	1	1	1	1	1	1	1	1	1	1	1			0.217	0.213	0.216	0.212	0.2146	0.198	0.1662	0.152	0.124	0.106	0.078	0.218			175	175	175	175	175	175	175	175
259.5	0.221	0.217	0.221	0.215	0.2176	0.201	0.1682	0.156	0.128	0.109	0.079	0.225		1	1	1	1	1	1	1	1	1	1	1	1			0.221	0.217	0.221	0.215	0.2176	0.201	0.1682	0.156	0.128	0.109	0.079	0.225			176	176	176	176	176	176	176	176
261	0.224	0.216	0.221	0.218	0.2266	0.2	0.1692	0.158	0.129	0.11	0.081	0.223		1	1	1	1	1	1	1	1	1	1	1	1			0.224	0.216	0.221	0.218	0.2266	0.2	0.1692	0.158	0.129	0.11	0.081	0.223			177	177	177	177	177	177	177	177
262.5	0.221	0.219	0.223	0.218	0.2296	0.202	0.1682	0.156	0.126	0.109	0.083	0.222		1	1	1	1	1	1	1	1	1	1	1	1			0.221	0.219	0.223	0.218	0.2296	0.202	0.1682	0.156	0.126	0.109	0.083	0.222			178	178	178	178	178	178	178	178
264	0.23	0.23	0.226	0.214	0.2296	0.202	0.1672	0.159	0.13	0.11	0.083	0.228		1	1	1	1	1	1	1	1	1	1	1	1			0.23	0.23	0.226	0.214	0.2296	0.202	0.1672	0.159	0.13	0.11	0.083	0.228			179	179	179	179	179	179	179	179
265.5	0.23	0.225	0.23	0.22	0.2326	0.206	0.1762	0.161	0.127	0.111	0.085	0.225		1	1	1	1	1	1	1	1	1	1	1	1			0.23	0.225	0.23	0.22	0.2326	0.206	0.1762	0.161	0.127	0.111	0.085	0.225			180	180	180	180	180	180	180	180
267	0.232	0.227	0.232	0.227	0.2316	0.204	0.1772	0.16	0.128	0.114	0.086	0.228		1	1	1	1	1	1	1	1	1	1	1	1			0.232	0.227	0.232	0.227	0.2316	0.204	0.1772	0.16	0.128	0.114	0.086	0.228			181	181	181	181	181	181	181	181
268.5	0.232	0.231	0.234	0.228	0.2356	0.205	0.1782	0.162	0.133	0.114	0.087	0.23		1	1	1	1	1	1	1	1	1	1	1	1			0.232	0.231	0.234	0.228	0.2356	0.205	0.1782	0.162	0.133	0.114	0.087	0.23			182	182	182	182	182	182	182	182
270	0.24	0.237	0.232	0.226	0.2386	0.211	0.1772	0.169	0.136	0.115	0.089	0.227		1	1	1	1	1	1	1	1	1	1	1	1			0.24	0.237	0.232	0.226	0.2386	0.211	0.1772	0.169	0.136	0.115	0.089	0.227			183	183	183	183	183	183	183	183
[truncated: 54 more columns]

## Sheet: W130Q_inositol
	2020-08-15 W130Q 40 uM GSSG 500 uM EDTA 1 mM PIPES 10 mM pH6.7 NaCl 150 mM T = 42 C inositol X mM													2020-08-15 W130Q 40 uM GSSG 500 uM EDTA 1 mM PIPES 10 mM pH6.7 NaCl 150 mM T = 42 C inositol X mM														2020-08-15 W130Q 40 uM GSSG 500 uM EDTA 1 mM PIPES 10 mM pH6.7 NaCl 150 mM T = 42 C inositol X mM														2020-08-15 W130Q 40 uM GSSG 500 uM EDTA 1 mM PIPES 10 mM pH6.7 NaCl 150 mM T = 42 C inositol X mM
	0	10	20	30	40	60	80	110	140	180	220	270		0	10	20	30	40	60	80	110	140	180	220	270			0	10	20	30	40	60	80	110	140	180	220	270			0	10	20	30	40	60	80	110
0	-0.00333333	-0.000666667	-0.000166667	0.000333333	-0.000833333	-0.0005	-0.000333333	-0.00116667	-0.000666667	-0.000166667	-0.0005	-0.00133333		0	0	0	0	0	0	0	0	0	0	0	0			0	0	0	0	0	0	0	0	0	0	0	0			0	0	0	0	0	0	0	0
1.5	-0.00333333	-0.000666667	-0.000166667	0.000333333	-0.000833333	-0.0005	-0.000333333	-0.00116667	-0.000666667	-0.00116667	0.0005	0.00266667		0	0	0	0	0	0	0	0	0	0	0	0			0	0	0	0	0	0	0	0	0	0	0	0			0	0	0	0	0	0	0	0
3	-0.00333333	0.000333333	-0.000166667	0.000333333	-0.000833333	0.0005	-0.000333333	-0.000166667	-0.000666667	-0.000166667	0.0005	0.00866667		0	0	0	0	0	0	0	0	0	0	0	0			0	0	0	0	0	0	0	0	0	0	0	0			0	0	0	0	0	0	0	0
4.5	-0.00333333	0.000333333	-0.000166667	0.000333333	0.000166667	-0.0005	-0.000333333	-0.000166667	0.000333333	-0.000166667	0.0005	-0.00133333		0	0	0	0	0	0	0	0	0	0	0	0			0	0	0	0	0	0	0	0	0	0	0	0			0	0	0	0	0	0	0	0
6	-0.00333333	-0.000666667	-0.00116667	0.000333333	-0.000833333	-0.0005	-0.000333333	-0.000166667	-0.000666667	-0.000166667	0.0005	-0.000333333		0	0	0	0	0	0	0	0	0	0	0	0			0	0	0	0	0	0	0	0	0	0	0	0			0	0	0	0	0	0	0	0
7.5	-0.00233333	-0.000666667	-0.000166667	-0.000666667	0.000166667	0.0005	0.000666667	-0.000166667	0.000333333	-0.000166667	-0.0005	-0.000333333		0	0	0	0	0	0	0	0	0	0	0	0			0	0	0	0	0	0	0	0	0	0	0	0			0	0	0	0	0	0	0	0
9	-0.00133333	-0.000666667	-0.000166667	0.000333333	0.000166667	-0.0005	-0.000333333	-0.000166667	-0.000666667	-0.000166667	-0.0005	-0.000333333		0	0	0	0	0	0	0	0	0	0	0	0			0	0	0	0	0	0	0	0	0	0	0	0			0	0	0	0	0	0	0	0
10.5	-0.000333333	0.000333333	-0.000166667	0.000333333	-0.000833333	-0.0005	-0.000333333	-0.000166667	0.000333333	-0.000166667	0.0005	0.000666667		0	0	0	0	0	0	0	0	0	0	0	0			0	0	0	0	0	0	0	0	0	0	0	0			0	0	0	0	0	0	0	0
12	0.000666667	0.000333333	-0.000166667	-0.000666667	0.000166667	-0.0005	-0.000333333	0.000833333	0.000333333	-0.000166667	0.0005	-0.000333333		0	0	0	0	0	0	0	0	0	0	0	0			0	0	0	0	0	0	0	0	0	0	0	0			0	0	0	0	0	0	0	0
13.5	0.00166667	0.000333333	0.000833333	0.000333333	0.000166667	0.0005	0.000666667	-0.000166667	-0.000666667	0.000833333	0.0005	-0.000333333		0	0	0	0	0	0	0	0	0	0	0	0			0	0	0	0	0	0	0	0	0	0	0	0			0	0	0	0	0	0	0	0
15	0.00166667	0.000333333	-0.000166667	0.000333333	0.000166667	0.0005	-0.000333333	-0.000166667	0.000333333	-0.000166667	-0.0005	0.000666667		0	0	0	0	0	0	0	0	0	0	0	0			0	0	0	0	0	0	0	0	0	0	0	0			0	0	0	0	0	0	0	0
16.5	0.00166667	0.000333333	0.000833333	0.00133333	0.000166667	0.0005	0.000666667	-0.000166667	0.000333333	-0.000166667	0.0005	0.000666667		0	0	0	0	0	0	0	0	0	0	0	0			0	0	0	0	0	0	0	0	0	0	0	0			0	0	0	0	0	0	0	0
18	0.00166667	0.00133333	0.00183333	0.000333333	0.000166667	0.0005	0.000666667	-0.000166667	0.00133333	0.000833333	0.0005	0.000666667		0	0	0	0	0	0	0	0	0	0	0	0			0	0	0	0	0	0	0	0	0	0	0	0			0	0	0	0	0	0	0	0
19.5	0.00166667	0.000333333	0.000833333	0.000333333	0.000166667	0.0005	0.000666667	-0.000166667	0.000333333	0.000833333	0.0005	-0.000333333		0	0	0	0	0	0	0	0	0	0	0	0			0	0	0	0	0	0	0	0	0	0	0	0			0	0	0	0	0	0	0	0
21	0.00266667	0.000333333	0.000833333	0.000333333	0.000166667	0.0005	0.000666667	0.000833333	0.00133333	0.000833333	0.0005	0.000666667		0	0	0	0	0	0	0	0	0	0	0	0			0	0	0	0	0	0	0	0	0	0	0	0			0	0	0	0	0	0	0	0
22.5	0.00266667	0.00133333	0.000833333	0.00133333	0.000166667	0.0005	0.000666667	0.000833333	0.00133333	0.000833333	0.0015	0.00166667		0	0	0	0	0	0	0	0	0	0	0	0			0	0	0	0	0	0	0	0	0	0	0	0			0	0	0	0	0	0	0	0
24	0.00266667	0.000333333	0.000833333	0.000333333	0.00116667	0.0005	0.000666667	-0.000166667	0.00133333	-0.000166667	0.0005	0.000666667		0	0	0	0	0	0	0	0	0	0	0	0			0	0	0	0	0	0	0	0	0	0	0	0			0	0	0	0	0	0	0	0
25.5	0.00366667	0.00133333	0.00183333	0.00133333	0.00116667	0.0015	0.00166667	0.000833333	0.00233333	0.000833333	0.0005	0.00166667		0	0	0	0	0	0	0	0	0	0	0	0			0	0	0	0	0	0	0	0	0	0	0	0			0	0	0	0	0	0	0	0
27	0.00466667	0.00233333	0.00283333	0.00233333	0.00116667	0.0025	0.00166667	0.00183333	0.00233333	0.000833333	0.0015	0.00266667		0	0	0	0	0	0	0	0	0	0	0	0			0	0	0	0	0	0	0	0	0	0	0	0			0	0	0	0	0	0	0	0
28.5	0.00466667	0.00233333	0.00283333	0.00233333	0.00216667	0.0025	0.00166667	0.00183333	0.00233333	0.000833333	0.0015	0.000666667		0	0	0	0	0	0	0	0	0	0	0	0			0	0	0	0	0	0	0	0	0	0	0	0			0	0	0	0	0	0	0	0
30	0.00566667	0.00233333	0.00383333	0.00233333	0.00216667	0.0025	0.00266667	0.00183333	0.00233333	0.00183333	0.0005	0.00166667		0	0	0	0	0	0	0	0	0	0	0	0			0	0	0	0	0	0	0	0	0	0	0	0			0	0	0	0	0	0	0	0
31.5	0.00666667	0.00333333	0.00383333	0.00233333	0.00316667	0.0025	0.00266667	0.00283333	0.00233333	0.00183333	0.0025	0.00266667		0	0	0	0	0	0	0	0	0	0	0	0			0	0	0	0	0	0	0	0	0	0	0	0			0	0	0	0	0	0	0	0
33	0.00666667	0.00433333	0.00483333	0.00433333	0.00316667	0.0035	0.00366667	0.00283333	0.00233333	0.00183333	0.0025	0.00266667		0	0	0	0	0	0	0	0	0	0	0	0			0	0	0	0	0	0	0	0	0	0	0	0			0	0	0	0	0	0	0	0
34.5	0.00766667	0.00433333	0.00583333	0.00433333	0.00416667	0.0045	0.00366667	0.00383333	0.00333333	0.00283333	0.0025	0.00166667		0	0	0	0	0	0	0	0	0	0	0	0			0	0	0	0	0	0	0	0	0	0	0	0			0	0	0	0	0	0	0	0
36	0.00766667	0.00433333	0.00683333	0.00533333	0.00516667	0.0055	0.00366667	0.00383333	0.00333333	0.00183333	0.0025	0.00166667		0	0	0	0	0	0	0	0	0	0	0	0			0	0	0	0	0	0	0	0	0	0	0	0			0	0	0	0	0	0	0	0
37.5	0.00966667	0.00633333	0.00783333	0.00733333	0.00616667	0.0065	0.00566667	0.00583333	0.00433333	0.00283333	0.0025	0.00366667		0	0	0	0	0	0	0	0	0	0	0	0			0	0	0	0	0	0	0	0	0	0	0	0			0	0	0	0	0	0	0	0
39	0.0106667	0.00733333	0.00883333	0.00733333	0.00716667	0.0065	0.00666667	0.00483333	0.00533333	0.00283333	0.0025	0.00266667		0	0	0	0	0	0	0	0	0	0	0	0			0	0	0	0	0	0	0	0	0	0	0	0			0	0	0	0	0	0	0	0
40.5	0.0116667	0.00833333	0.00983333	0.00833333	0.00716667	0.0085	0.00766667	0.00583333	0.00533333	0.00383333	0.0025	0.00366667		0	0	0	0	0	0	0	0	0	0	0	0			0	0	0	0	0	0	0	0	0	0	0	0			0	0	0	0	0	0	0	0
42	0.0126667	0.00933333	0.00983333	0.0103333	0.00916667	0.0095	0.00866667	0.00783333	0.00633333	0.00383333	0.0035	0.00366667		0	0	0	0	0	0	0	0	0	0	0	0			0	0	0	0	0	0	0	0	0	0	0	0			0	0	0	0	0	0	0	0
43.5	0.0156667	0.0123333	0.0118333	0.0113333	0.0111667	0.0115	0.00966667	0.00783333	0.00733333	0.00383333	0.0045	0.00466667		0	0	0	0	0	0	0	0	0	0	0	0			0	0	0	0	0	0	0	0	0	0	0	0			0	0	0	0	0	0	0	0
45	0.0166667	0.0133333	0.0138333	0.0133333	0.0121667	0.0125	0.0106667	0.00883333	0.00833333	0.00583333	0.0045	0.00366667		0	0	0	0	0	0	0	0	0	0	0	0			0	0	0	0	0	0	0	0	0	0	0	0			0	0	0	0	0	0	0	0
46.5	0.0186667	0.0143333	0.0148333	0.0153333	0.0141667	0.0135	0.0116667	0.00983333	0.00833333	0.00583333	0.0035	0.00466667		0	0	0	0	0	0	0	0	0	0	0	0			0	0	0	0	0	0	0	0	0	0	0	0			0	0	0	0	0	0	0	0
48	0.0206667	0.0163333	0.0168333	0.0173333	0.0171667	0.0155	0.0136667	0.0108333	0.00933333	0.00583333	0.0055	0.00466667		0	0	0	0	0	0	0	0	0	0	0	0			0	0	0	0	0	0	0	0	0	0	0	0			0	0	0	0	0	0	0	0
49.5	0.0236667	0.0183333	0.0188333	0.0193333	0.0191667	0.0175	0.0146667	0.0128333	0.00933333	0.00683333	0.0055	0.00466667		0	0	0	0	0	0	0	0	0	0	0	0			0	0	0	0	0	0	0	0	0	0	0	0			0	0	0	0	0	0	0	0
51	0.0266667	0.0213333	0.0218333	0.0223333	0.0211667	0.0195	0.0176667	0.0148333	0.0113333	0.00783333	0.0065	0.00566667		0	0	0	0	0	0	0	0	0	0	0	0			0	0	0	0	0	0	0	0	0	0	0	0			0	0	0	0	0	0	0	0
52.5	0.0296667	0.0233333	0.0258333	0.0253333	0.0251667	0.0225	0.0196667	0.0168333	0.0133333	0.00883333	0.0075	0.00766667		0	0	0	0	0	0	0	0	0	0	0	0			0	0	0	0	0	0	0	0	0	0	0	0			0	0	0	0	0	0	0	0
54	0.0336667	0.0263333	0.0278333	0.0273333	0.0271667	0.0245	0.0216667	0.0178333	0.0133333	0.00883333	0.0075	0.00666667		0	0	0	0	0	0	0	0	0	0	0	0			0	0	0	0	0	0	0	0	0	0	0	0			0	0	0	0	0	0	0	0
55.5	0.0376667	0.0293333	0.0318333	0.0313333	0.0311667	0.0275	0.0236667	0.0198333	0.0153333	0.00983333	0.0075	0.00866667		0	0	0	0	0	0	0	0	0	0	0	0			0	0	0	0	0	0	0	0	0	0	0	0			0	0	0	0	0	0	0	0
57	0.0416667	0.0343333	0.0358333	0.0353333	0.0341667	0.0305	0.0266667	0.0218333	0.0173333	0.0118333	0.0085	0.00766667		0	0	0	0	0	0	0	0	0	0	0	0			0	0	0	0	0	0	0	0	0	0	0	0			0	0	0	0	0	0	0	0
58.5	0.0456667	0.0373333	0.0388333	0.0403333	0.0381667	0.0335	0.0296667	0.0238333	0.0193333	0.0128333	0.0095	0.00866667		1	0	0	0	0	0	0	0	0	0	0	0			0.0456667	0	0	0	0	0	0	0	0	0	0	0			42	0	0	0	0	0	0	0
60	0.0506667	0.0413333	0.0428333	0.0433333	0.0421667	0.0385	0.0336667	0.0258333	0.0213333	0.0148333	0.0105	0.00866667		1	0	0	0	0	0	0	0	0	0	0	0			0.0506667	0	0	0	0	0	0	0	0	0	0	0			43	0	0	0	0	0	0	0
61.5	0.0556667	0.0463333	0.0488333	0.0483333	0.0471667	0.0415	0.0366667	0.0288333	0.0233333	0.0158333	0.0115	0.00866667		1	1	1	1	1	0	0	0	0	0	0	0			0.0556667	0.0463333	0.0488333	0.0483333	0.0471667	0	0	0	0	0	0	0			44	44	44	44	44	0	0	0
63	0.0606667	0.0503333	0.0518333	0.0533333	0.0511667	0.0445	0.0396667	0.0318333	0.0263333	0.0178333	0.0125	0.00966667		1	1	1	1	1	0	0	0	0	0	0	0			0.0606667	0.0503333	0.0518333	0.0533333	0.0511667	0	0	0	0	0	0	0			45	45	45	45	45	0	0	0
64.5	0.0666667	0.0553333	0.0568333	0.0583333	0.0561667	0.0505	0.0436667	0.0348333	0.0283333	0.0198333	0.0145	0.0106667		1	1	1	1	1	1	0	0	0	0	0	0			0.0666667	0.0553333	0.0568333	0.0583333	0.0561667	0.0505	0	0	0	0	0	0			46	46	46	46	46	46	0	0
66	0.0736667	0.0603333	0.0638333	0.0643333	0.0621667	0.0555	0.0466667	0.0378333	0.0313333	0.0208333	0.0155	0.0116667		1	1	1	1	1	1	1	0	0	0	0	0			0.0736667	0.0603333	0.0638333	0.0643333	0.0621667	0.0555	0.0466667	0	0	0	0	0			47	47	47	47	47	47	47	0
67.5	0.0786667	0.0663333	0.0678333	0.0703333	0.0681667	0.0595	0.0516667	0.0418333	0.0333333	0.0238333	0.0165	0.0126667		1	1	1	1	1	1	1	0	0	0	0	0			0.0786667	0.0663333	0.0678333	0.0703333	0.0681667	0.0595	0.0516667	0	0	0	0	0			48	48	48	48	48	48	48	0
69	0.0846667	0.0723333	0.0728333	0.0753333	0.0721667	0.0635	0.0566667	0.0448333	0.0353333	0.0248333	0.0175	0.0126667		1	1	1	1	1	1	1	0	0	0	0	0			0.0846667	0.0723333	0.0728333	0.0753333	0.0721667	0.0635	0.0566667	0	0	0	0	0			49	49	49	49	49	49	49	0
70.5	0.0896667	0.0773333	0.0788333	0.0823333	0.0771667	0.0685	0.0606667	0.0478333	0.0383333	0.0258333	0.0185	0.0126667		1	1	1	1	1	1	1	1	0	0	0	0			0.0896667	0.0773333	0.0788333	0.0823333	0.0771667	0.0685	0.0606667	0.0478333	0	0	0	0			50	50	50	50	50	50	50	50
72	0.0966667	0.0813333	0.0858333	0.0873333	0.0841667	0.0745	0.0646667	0.0518333	0.0413333	0.0278333	0.0205	0.0146667		1	1	1	1	1	1	1	1	0	0	0	0			0.0966667	0.0813333	0.0858333	0.0873333	0.0841667	0.0745	0.0646667	0.0518333	0	0	0	0			51	51	51	51	51	51	51	51
73.5	0.104667	0.0883333	0.0918333	0.0943333	0.0901667	0.0795	0.0706667	0.0568333	0.0453333	0.0318333	0.0225	0.0156667		1	1	1	1	1	1	1	1	1	0	0	0			0.104667	0.0883333	0.0918333	0.0943333	0.0901667	0.0795	0.0706667	0.0568333	0.0453333	0	0	0			52	52	52	52	52	52	52	52
75	0.112667	0.0943333	0.0978333	0.101333	0.0961667	0.0855	0.0746667	0.0598333	0.0483333	0.0338333	0.0235	0.0186667		1	1	1	1	1	1	1	1	1	0	0	0			0.112667	0.0943333	0.0978333	0.101333	0.0961667	0.0855	0.0746667	0.0598333	0.0483333	0	0	0			53	53	53	53	53	53	53	53
76.5	0.117667	0.0993333	0.102833	0.106333	0.103167	0.0895	0.0786667	0.0648333	0.0513333	0.0358333	0.0245	0.0186667		1	1	1	1	1	1	1	1	1	0	0	0			0.117667	0.0993333	0.102833	0.106333	0.103167	0.0895	0.0786667	0.0648333	0.0513333	0	0	0			54	54	54	54	54	54	54	54
78	0.122667	0.108333	0.109833	0.113333	0.109167	0.0965	0.0846667	0.0688333	0.0563333	0.0378333	0.0265	0.0206667		1	1	1	1	1	1	1	1	1	0	0	0			0.122667	0.108333	0.109833	0.113333	0.109167	0.0965	0.0846667	0.0688333	0.0563333	0	0	0			55	55	55	55	55	55	55	55
79.5	0.130667	0.113333	0.114833	0.118333	0.113167	0.1025	0.0906667	0.0738333	0.0583333	0.0418333	0.0285	0.0216667		1	1	1	1	1	1	1	1	1	0	0	0			0.130667	0.113333	0.114833	0.118333	0.113167	0.1025	0.0906667	0.0738333	0.0583333	0	0	0			56	56	56	56	56	56	56	56
81	0.139667	0.120333	0.120833	0.124333	0.120167	0.1085	0.0956667	0.0788333	0.0623333	0.0438333	0.0305	0.0236667		1	1	1	1	1	1	1	1	1	0	0	0			0.139667	0.120333	0.120833	0.124333	0.120167	0.1085	0.0956667	0.0788333	0.0623333	0	0	0			57	57	57	57	57	57	57	57
82.5	0.148667	0.126333	0.126833	0.132333	0.127167	0.1145	0.100667	0.0818333	0.0663333	0.0468333	0.0325	0.0256667		1	1	1	1	1	1	1	1	1	1	0	0			0.148667	0.126333	0.126833	0.132333	0.127167	0.1145	0.100667	0.0818333	0.0663333	0.0468333	0	0			58	58	58	58	58	58	58	58
84	0.155667	0.135333	0.137833	0.139333	0.134167	0.1205	0.106667	0.0878333	0.0713333	0.0498333	0.0345	0.0266667		1	1	1	1	1	1	1	1	1	1	0	0			0.155667	0.135333	0.137833	0.139333	0.134167	0.1205	0.106667	0.0878333	0.0713333	0.0498333	0	0			59	59	59	59	59	59	59	59
85.5	0.160667	0.140333	0.142833	0.146333	0.140167	0.1265	0.112667	0.0928333	0.0763333	0.0528333	0.0375	0.0296667		1	1	1	1	1	1	1	1	1	1	0	0			0.160667	0.140333	0.142833	0.146333	0.140167	0.1265	0.112667	0.0928333	0.0763333	0.0528333	0	0			60	60	60	60	60	60	60	60
87	0.168667	0.147333	0.149833	0.150333	0.147167	0.1335	0.118667	0.0968333	0.0793333	0.0558333	0.0395	0.0306667		1	1	1	1	1	1	1	1	1	1	0	0			0.168667	0.147333	0.149833	0.150333	0.147167	0.1335	0.118667	0.0968333	0.0793333	0.0558333	0	0			61	61	61	61	61	61	61	61
88.5	0.177667	0.152333	0.155833	0.160333	0.155167	0.1375	0.124667	0.100833	0.0833333	0.0598333	0.0415	0.0326667		1	1	1	1	1	1	1	1	1	1	0	0			0.177667	0.152333	0.155833	0.160333	0.155167	0.1375	0.124667	0.100833	0.0833333	0.0598333	0	0			62	62	62	62	62	62	62	62
90	0.184667	0.160333	0.164833	0.164333	0.162167	0.1455	0.131667	0.106833	0.0883333	0.0618333	0.0445	0.0346667		1	1	1	1	1	1	1	1	1	1	0	0			0.184667	0.160333	0.164833	0.164333	0.162167	0.1455	0.131667	0.106833	0.0883333	0.0618333	0	0			63	63	63	63	63	63	63	63
91.5	0.189667	0.167333	0.169833	0.173333	0.170167	0.1505	0.136667	0.112833	0.0933333	0.0658333	0.0475	0.0366667		1	1	1	1	1	1	1	1	1	1	1	0			0.189667	0.167333	0.169833	0.173333	0.170167	0.1505	0.136667	0.112833	0.0933333	0.0658333	0.0475	0			64	64	64	64	64	64	64	64
93	0.197667	0.173333	0.176833	0.179333	0.176167	0.1555	0.138667	0.115833	0.0963333	0.0698333	0.0485	0.0396667		1	1	1	1	1	1	1	1	1	1	1	0			0.197667	0.173333	0.176833	0.179333	0.176167	0.1555	0.138667	0.115833	0.0963333	0.0698333	0.0485	0			65	65	65	65	65	65	65	65
94.5	0.203667	0.181333	0.184833	0.186333	0.181167	0.1645	0.145667	0.121833	0.0993333	0.0718333	0.0515	0.0416667		1	1	1	1	1	1	1	1	1	1	1	0			0.203667	0.181333	0.184833	0.186333	0.181167	0.1645	0.145667	0.121833	0.0993333	0.0718333	0.0515	0			66	66	66	66	66	66	66	66
96	0.209667	0.188333	0.191833	0.194333	0.189167	0.1695	0.150667	0.127833	0.106333	0.0758333	0.0545	0.0436667		1	1	1	1	1	1	1	1	1	1	1	0			0.209667	0.188333	0.191833	0.194333	0.189167	0.1695	0.150667	0.127833	0.106333	0.0758333	0.0545	0			67	67	67	67	67	67	67	67
97.5	0.220667	0.189333	0.194833	0.200333	0.192167	0.1775	0.156667	0.130833	0.109333	0.0798333	0.0575	0.0446667		1	1	1	1	1	1	1	1	1	1	1	0			0.220667	0.189333	0.194833	0.200333	0.192167	0.1775	0.156667	0.130833	0.109333	0.0798333	0.0575	0			68	68	68	68	68	68	68	68
99	0.222667	0.198333	0.203833	0.205333	0.201167	0.1825	0.164667	0.136833	0.115333	0.0838333	0.0595	0.0456667		1	1	1	1	1	1	1	1	1	1	1	1			0.222667	0.198333	0.203833	0.205333	0.201167	0.1825	0.164667	0.136833	0.115333	0.0838333	0.0595	0.0456667			69	69	69	69	69	69	69	69
100.5	0.233667	0.206333	0.213833	0.212333	0.204167	0.1895	0.169667	0.140833	0.120333	0.0878333	0.0625	0.0486667		1	1	1	1	1	1	1	1	1	1	1	1			0.233667	0.206333	0.213833	0.212333	0.204167	0.1895	0.169667	0.140833	0.120333	0.0878333	0.0625	0.0486667			70	70	70	70	70	70	70	70
102	0.239667	0.213333	0.217833	0.219333	0.210167	0.1935	0.175667	0.145833	0.125333	0.0928333	0.0655	0.0506667		1	1	1	1	1	1	1	1	1	1	1	1			0.239667	0.213333	0.217833	0.219333	0.210167	0.1935	0.175667	0.145833	0.125333	0.0928333	0.0655	0.0506667			71	71	71	71	71	71	71	71
103.5	0.242667	0.220333	0.221833	0.227333	0.215167	0.1995	0.181667	0.151833	0.129333	0.0938333	0.0675	0.0516667		1	1	1	1	1	1	1	1	1	1	1	1			0.242667	0.220333	0.221833	0.227333	0.215167	0.1995	0.181667	0.151833	0.129333	0.0938333	0.0675	0.0516667			72	72	72	72	72	72	72	72
105	0.249667	0.224333	0.227833	0.230333	0.222167	0.2045	0.186667	0.154833	0.133333	0.0968333	0.0715	0.0536667		1	1	1	1	1	1	1	1	1	1	1	1			0.249667	0.224333	0.227833	0.230333	0.222167	0.2045	0.186667	0.154833	0.133333	0.0968333	0.0715	0.0536667			73	73	73	73	73	73	73	73
106.5	0.257667	0.231333	0.236833	0.238333	0.225167	0.2115	0.192667	0.160833	0.136333	0.101833	0.0745	0.0556667		1	1	1	1	1	1	1	1	1	1	1	1			0.257667	0.231333	0.236833	0.238333	0.225167	0.2115	0.192667	0.160833	0.136333	0.101833	0.0745	0.0556667			74	74	74	74	74	74	74	74
108	0.259667	0.240333	0.241833	0.244333	0.235167	0.2165	0.198667	0.168833	0.141333	0.105833	0.0775	0.0576667		1	1	1	1	1	1	1	1	1	1	1	1			0.259667	0.240333	0.241833	0.244333	0.235167	0.2165	0.198667	0.168833	0.141333	0.105833	0.0775	0.0576667			75	75	75	75	75	75	75	75
109.5	0.272667	0.245333	0.244833	0.250333	0.241167	0.2225	0.205667	0.171833	0.143333	0.108833	0.0795	0.0596667		1	1	1	1	1	1	1	1	1	1	1	1			0.272667	0.245333	0.244833	0.250333	0.241167	0.2225	0.205667	0.171833	0.143333	0.108833	0.0795	0.0596667			76	76	76	76	76	76	76	76
111	0.279667	0.248333	0.250833	0.256333	0.248167	0.2285	0.206667	0.171833	0.148333	0.113833	0.0815	0.0606667		1	1	1	1	1	1	1	1	1	1	1	1			0.279667	0.248333	0.250833	0.256333	0.248167	0.2285	0.206667	0.171833	0.148333	0.113833	0.0815	0.0606667			77	77	77	77	77	77	77	77
112.5	0.280667	0.254333	0.257833	0.262333	0.254167	0.2325	0.213667	0.179833	0.154333	0.115833	0.0855	0.0646667		1	1	1	1	1	1	1	1	1	1	1	1			0.280667	0.254333	0.257833	0.262333	0.254167	0.2325	0.213667	0.179833	0.154333	0.115833	0.0855	0.0646667			78	78	78	78	78	78	78	78
114	0.287667	0.261333	0.260833	0.267333	0.255167	0.2365	0.214667	0.185833	0.159333	0.117833	0.0885	0.0656667		1	1	1	1	1	1	1	1	1	1	1	1			0.287667	0.261333	0.260833	0.267333	0.255167	0.2365	0.214667	0.185833	0.159333	0.117833	0.0885	0.0656667			79	79	79	79	79	79	79	79
115.5	0.293667	0.269333	0.267833	0.278333	0.261167	0.2415	0.222667	0.187833	0.162333	0.122833	0.0915	0.0686667		1	1	1	1	1	1	1	1	1	1	1	1			0.293667	0.269333	0.267833	0.278333	0.261167	0.2415	0.222667	0.187833	0.162333	0.122833	0.0915	0.0686667			80	80	80	80	80	80	80	80
117	0.296667	0.275333	0.278833	0.288333	0.269167	0.2455	0.222667	0.192833	0.166333	0.128833	0.0945	0.0706667		1	1	1	1	1	1	1	1	1	1	1	1			0.296667	0.275333	0.278833	0.288333	0.269167	0.2455	0.222667	0.192833	0.166333	0.128833	0.0945	0.0706667			81	81	81	81	81	81	81	81
118.5	0.307667	0.278333	0.282833	0.288333	0.270167	0.2445	0.228667	0.200833	0.170333	0.129833	0.0955	0.0726667		1	1	1	1	1	1	1	1	1	1	1	1			0.307667	0.278333	0.282833	0.288333	0.270167	0.2445	0.228667	0.200833	0.170333	0.129833	0.0955	0.0726667			82	82	82	82	82	82	82	82
120	0.310667	0.283333	0.286833	0.298333	0.280167	0.2555	0.235667	0.203833	0.173333	0.133833	0.0995	0.0746667		1	1	1	1	1	1	1	1	1	1	1	1			0.310667	0.283333	0.286833	0.298333	0.280167	0.2555	0.235667	0.203833	0.173333	0.133833	0.0995	0.0746667			83	83	83	83	83	83	83	83
121.5	0.309667	0.287333	0.290833	0.301333	0.282167	0.2625	0.239667	0.207833	0.179333	0.137833	0.1025	0.0776667		1	1	1	1	1	1	1	1	1	1	1	1			0.309667	0.287333	0.290833	0.301333	0.282167	0.2625	0.239667	0.207833	0.179333	0.137833	0.1025	0.0776667			84	84	84	84	84	84	84	84
123	0.321667	0.291333	0.294833	0.301333	0.287167	0.2595	0.244667	0.211833	0.183333	0.140833	0.1065	0.0786667		1	1	1	1	1	1	1	1	1	1	1	1			0.321667	0.291333	0.294833	0.301333	0.287167	0.2595	0.244667	0.211833	0.183333	0.140833	0.1065	0.0786667			85	85	85	85	85	85	85	85
124.5	0.329667	0.293333	0.297833	0.308333	0.297167	0.2665	0.251667	0.216833	0.187333	0.144833	0.1085	0.0816667		1	1	1	1	1	1	1	1	1	1	1	1			0.329667	0.293333	0.297833	0.308333	0.297167	0.2665	0.251667	0.216833	0.187333	0.144833	0.1085	0.0816667			86	86	86	86	86	86	86	86
126	0.328667	0.302333	0.302833	0.310333	0.300167	0.2755	0.255667	0.216833	0.190333	0.149833	0.1125	0.0846667		1	1	1	1	1	1	1	1	1	1	1	1			0.328667	0.302333	0.302833	0.310333	0.300167	0.2755	0.255667	0.216833	0.190333	0.149833	0.1125	0.0846667			87	87	87	87	87	87	87	87
127.5	0.339667	0.308333	0.303833	0.318333	0.298167	0.2825	0.258667	0.224833	0.196333	0.152833	0.1175	0.0856667		1	1	1	1	1	1	1	1	1	1	1	1			0.339667	0.308333	0.303833	0.318333	0.298167	0.2825	0.258667	0.224833	0.196333	0.152833	0.1175	0.0856667			88	88	88	88	88	88	88	88
129	0.344667	0.311333	0.312833	0.324333	0.309167	0.2835	0.260667	0.222833	0.197333	0.151833	0.1185	0.0886667		1	1	1	1	1	1	1	1	1	1	1	1			0.344667	0.311333	0.312833	0.324333	0.309167	0.2835	0.260667	0.222833	0.197333	0.151833	0.1185	0.0886667			89	89	89	89	89	89	89	89
130.5	0.348667	0.311333	0.318833	0.330333	0.311167	0.2895	0.273667	0.229833	0.202333	0.158833	0.1235	0.0916667		1	1	1	1	1	1	1	1	1	1	1	1			0.348667	0.311333	0.318833	0.330333	0.311167	0.2895	0.273667	0.229833	0.202333	0.158833	0.1235	0.0916667			90	90	90	90	90	90	90	90
132	0.352667	0.323333	0.315833	0.336333	0.312167	0.2985	0.269667	0.237833	0.205333	0.161833	0.1245	0.0906667		1	1	1	1	1	1	1	1	1	1	1	1			0.352667	0.323333	0.315833	0.336333	0.312167	0.2985	0.269667	0.237833	0.205333	0.161833	0.1245	0.0906667			91	91	91	91	91	91	91	91
133.5	0.355667	0.330333	0.327833	0.342333	0.327167	0.3005	0.268667	0.238833	0.209333	0.165833	0.1265	0.0946667		1	1	1	1	1	1	1	1	1	1	1	1			0.355667	0.330333	0.327833	0.342333	0.327167	0.3005	0.268667	0.238833	0.209333	0.165833	0.1265	0.0946667			92	92	92	92	92	92	92	92
135	0.361667	0.336333	0.335833	0.345333	0.335167	0.3045	0.278667	0.237833	0.208333	0.167833	0.1285	0.0976667		1	1	1	1	1	1	1	1	1	1	1	1			0.361667	0.336333	0.335833	0.345333	0.335167	0.3045	0.278667	0.237833	0.208333	0.167833	0.1285	0.0976667			93	93	93	93	93	93	93	93
136.5	0.364667	0.336333	0.333833	0.348333	0.334167	0.3085	0.282667	0.242833	0.214333	0.170833	0.1315	0.100667		1	1	1	1	1	1	1	1	1	1	1	1			0.364667	0.336333	0.333833	0.348333	0.334167	0.3085	0.282667	0.242833	0.214333	0.170833	0.1315	0.100667			94	94	94	94	94	94	94	94
138	0.374667	0.347333	0.345833	0.348333	0.341167	0.3145	0.282667	0.251833	0.219333	0.172833	0.1335	0.103667		1	1	1	1	1	1	1	1	1	1	1	1			0.374667	0.347333	0.345833	0.348333	0.341167	0.3145	0.282667	0.251833	0.219333	0.172833	0.1335	0.103667			95	95	95	95	95	95	95	95
139.5	0.372667	0.345333	0.337833	0.359333	0.343167	0.3135	0.290667	0.246833	0.219333	0.174833	0.1355	0.103667		1	1	1	1	1	1	1	1	1	1	1	1			0.372667	0.345333	0.337833	0.359333	0.343167	0.3135	0.290667	0.246833	0.219333	0.174833	0.1355	0.103667			96	96	96	96	96	96	96	96
141	0.388667	0.348333	0.343833	0.353333	0.348167	0.3205	0.295667	0.250833	0.225333	0.181833	0.1415	0.106667		1	1	1	1	1	1	1	1	1	1	1	1			0.388667	0.348333	0.343833	0.353333	0.348167	0.3205	0.295667	0.250833	0.225333	0.181833	0.1415	0.106667			97	97	97	97	97	97	97	97
142.5	0.386667	0.351333	0.352833	0.362333	0.361167	0.3195	0.293667	0.254833	0.229333	0.182833	0.1465	0.106667		1	1	1	1	1	1	1	1	1	1	1	1			0.386667	0.351333	0.352833	0.362333	0.361167	0.3195	0.293667	0.254833	0.229333	0.182833	0.1465	0.106667			98	98	98	98	98	98	98	98
144	0.392667	0.355333	0.357833	0.367333	0.356167	0.3215	0.297667	0.256833	0.230333	0.186833	0.1455	0.111667		1	1	1	1	1	1	1	1	1	1	1	1			0.392667	0.355333	0.357833	0.367333	0.356167	0.3215	0.297667	0.256833	0.230333	0.186833	0.1455	0.111667			99	99	99	99	99	99	99	99
145.5	0.391667	0.351333	0.359833	0.364333	0.357167	0.3205	0.303667	0.267833	0.236333	0.189833	0.1465	0.113667		1	1	1	1	1	1	1	1	1	1	1	1			0.391667	0.351333	0.359833	0.364333	0.357167	0.3205	0.303667	0.267833	0.236333	0.189833	0.1465	0.113667			100	100	100	100	100	100	100	100
147	0.395667	0.366333	0.369833	0.369333	0.366167	0.3215	0.306667	0.263833	0.238333	0.191833	0.1535	0.114667		1	1	1	1	1	1	1	1	1	1	1	1			0.395667	0.366333	0.369833	0.369333	0.366167	0.3215	0.306667	0.263833	0.238333	0.191833	0.1535	0.114667			101	101	101	101	101	101	101	101
148.5	0.396667	0.369333	0.369833	0.381333	0.367167	0.3375	0.304667	0.268833	0.239333	0.195833	0.1535	0.118667		1	1	1	1	1	1	1	1	1	1	1	1			0.396667	0.369333	0.369833	0.381333	0.367167	0.3375	0.304667	0.268833	0.239333	0.195833	0.1535	0.118667			102	102	102	102	102	102	102	102
150	0.407667	0.368333	0.379833	0.373333	0.376167	0.3465	0.314667	0.278833	0.250333	0.197833	0.1575	0.121667		1	1	1	1	1	1	1	1	1	1	1	1			0.407667	0.368333	0.379833	0.373333	0.376167	0.3465	0.314667	0.278833	0.250333	0.197833	0.1575	0.121667			103	103	103	103	103	103	103	103
151.5	0.411667	0.375333	0.374833	0.389333	0.376167	0.3445	0.315667	0.277833	0.250333	0.203833	0.1575	0.122667		1	1	1	1	1	1	1	1	1	1	1	1			0.411667	0.375333	0.374833	0.389333	0.376167	0.3445	0.315667	0.277833	0.250333	0.203833	0.1575	0.122667			104	104	104	104	104	104	104	104
153	0.417667	0.373333	0.380833	0.381333	0.378167	0.3415	0.329667	0.289833	0.252333	0.201833	0.1615	0.124667		1	1	1	1	1	1	1	1	1	1	1	1			0.417667	0.373333	0.380833	0.381333	0.378167	0.3415	0.329667	0.289833	0.252333	0.201833	0.1615	0.124667			105	105	105	105	105	105	105	105
154.5	0.415667	0.377333	0.382833	0.387333	0.383167	0.3505	0.333667	0.293833	0.253333	0.205833	0.1625	0.124667		1	1	1	1	1	1	1	1	1	1	1	1			0.415667	0.377333	0.382833	0.387333	0.383167	0.3505	0.333667	0.293833	0.253333	0.205833	0.1625	0.124667			106	106	106	106	106	106	106	106
156	0.420667	0.382333	0.385833	0.396333	0.389167	0.3505	0.331667	0.287833	0.256333	0.206833	0.1645	0.128667		1	1	1	1	1	1	1	1	1	1	1	1			0.420667	0.382333	0.385833	0.396333	0.389167	0.3505	0.331667	0.287833	0.256333	0.206833	0.1645	0.128667			107	107	107	107	107	107	107	107
157.5	0.421667	0.389333	0.390833	0.403333	0.383167	0.3635	0.333667	0.289833	0.256333	0.210833	0.1705	0.132667		1	1	1	1	1	1	1	1	1	1	1	1			0.421667	0.389333	0.390833	0.403333	0.383167	0.3635	0.333667	0.289833	0.256333	0.210833	0.1705	0.132667			108	108	108	108	108	108	108	108
159	0.421667	0.391333	0.400833	0.415333	0.392167	0.3685	0.335667	0.299833	0.258333	0.215833	0.1685	0.131667		1	1	1	1	1	1	1	1	1	1	1	1			0.421667	0.391333	0.400833	0.415333	0.392167	0.3685	0.335667	0.299833	0.258333	0.215833	0.1685	0.131667			109	109	109	109	109	109	109	109
160.5	0.433667	0.398333	0.388833	0.404333	0.401167	0.3685	0.337667	0.300833	0.264333	0.213833	0.1715	0.133667		1	1	1	1	1	1	1	1	1	1	1	1			0.433667	0.398333	0.388833	0.404333	0.401167	0.3685	0.337667	0.300833	0.264333	0.213833	0.1715	0.133667			110	110	110	110	110	110	110	110
162	0.435667	0.405333	0.405833	0.417333	0.397167	0.3675	0.341667	0.307833	0.264333	0.221833	0.1755	0.137667		1	1	1	1	1	1	1	1	1	1	1	1			0.435667	0.405333	0.405833	0.417333	0.397167	0.3675	0.341667	0.307833	0.264333	0.221833	0.1755	0.137667			111	111	111	111	111	111	111	111
163.5	0.439667	0.400333	0.412833	0.415333	0.399167	0.3715	0.345667	0.316833	0.268333	0.225833	0.1765	0.137667		1	1	1	1	1	1	1	1	1	1	1	1			0.439667	0.400333	0.412833	0.415333	0.399167	0.3715	0.345667	0.316833	0.268333	0.225833	0.1765	0.137667			112	112	112	112	112	112	112	112
165	0.438667	0.396333	0.421833	0.424333	0.401167	0.3785	0.341667	0.309833	0.273333	0.223833	0.1825	0.140667		1	1	1	1	1	1	1	1	1	1	1	1			0.438667	0.396333	0.421833	0.424333	0.401167	0.3785	0.341667	0.309833	0.273333	0.223833	0.1825	0.140667			113	113	113	113	113	113	113	113
166.5	0.447667	0.410333	0.412833	0.423333	0.404167	0.3715	0.355667	0.310833	0.281333	0.225833	0.1825	0.140667		1	1	1	1	1	1	1	1	1	1	1	1			0.447667	0.410333	0.412833	0.423333	0.404167	0.3715	0.355667	0.310833	0.281333	0.225833	0.1825	0.140667			114	114	114	114	114	114	114	114
168	0.459667	0.411333	0.434833	0.422333	0.410167	0.3825	0.361667	0.306833	0.283333	0.224833	0.1855	0.140667		1	1	1	1	1	1	1	1	1	1	1	1			0.459667	0.411333	0.434833	0.422333	0.410167	0.3825	0.361667	0.306833	0.283333	0.224833	0.1855	0.140667			115	115	115	115	115	115	115	115
169.5	0.450667	0.426333	0.427833	0.435333	0.409167	0.3755	0.350667	0.317833	0.274333	0.228833	0.1855	0.145667		1	1	1	1	1	1	1	1	1	1	1	1			0.450667	0.426333	0.427833	0.435333	0.409167	0.3755	0.350667	0.317833	0.274333	0.228833	0.1855	0.145667			116	116	116	116	116	116	116	116
171	0.460667	0.419333	0.429833	0.442333	0.412167	0.3745	0.365667	0.324833	0.283333	0.226833	0.1855	0.148667		1	1	1	1	1	1	1	1	1	1	1	1			0.460667	0.419333	0.429833	0.442333	0.412167	0.3745	0.365667	0.324833	0.283333	0.226833	0.1855	0.148667			117	117	117	117	117	117	117	117
172.5	0.459667	0.433333	0.435833	0.446333	0.425167	0.4035	0.367667	0.328833	0.289333	0.234833	0.1865	0.148667		1	1	1	1	1	1	1	1	1	1	1	1			0.459667	0.433333	0.435833	0.446333	0.425167	0.4035	0.367667	0.328833	0.289333	0.234833	0.1865	0.148667			118	118	118	118	118	118	118	118
174	0.455667	0.441333	0.430833	0.451333	0.435167	0.4035	0.371667	0.321833	0.287333	0.236833	0.1895	0.150667		1	1	1	1	1	1	1	1	1	1	1	1			0.455667	0.441333	0.430833	0.451333	0.435167	0.4035	0.371667	0.321833	0.287333	0.236833	0.1895	0.150667			119	119	119	119	119	119	119	119
175.5	0.467667	0.440333	0.431833	0.442333	0.426167	0.3975	0.367667	0.326833	0.294333	0.232833	0.1965	0.150667		1	1	1	1	1	1	1	1	1	1	1	1			0.467667	0.440333	0.431833	0.442333	0.426167	0.3975	0.367667	0.326833	0.294333	0.232833	0.1965	0.150667			120	120	120	120	120	120	120	120
177	0.466667	0.440333	0.444833	0.444333	0.430167	0.4125	0.390667	0.332833	0.298333	0.240833	0.1955	0.153667		1	1	1	1	1	1	1	1	1	1	1	1			0.466667	0.440333	0.444833	0.444333	0.430167	0.4125	0.390667	0.332833	0.298333	0.240833	0.1955	0.153667			121	121	121	121	121	121	121	121
178.5	0.468667	0.434333	0.438833	0.453333	0.443167	0.4005	0.380667	0.328833	0.290333	0.239833	0.1935	0.159667		1	1	1	1	1	1	1	1	1	1	1	1			0.468667	0.434333	0.438833	0.453333	0.443167	0.4005	0.380667	0.328833	0.290333	0.239833	0.1935	0.159667			122	122	122	122	122	122	122	122
180	0.472667	0.450333	0.455833	0.459333	0.443167	0.4065	0.375667	0.329833	0.297333	0.251833	0.1975	0.157667		1	1	1	1	1	1	1	1	1	1	1	1			0.472667	0.450333	0.455833	0.459333	0.443167	0.4065	0.375667	0.329833	0.297333	0.251833	0.1975	0.157667			123	123	123	123	123	123	123	123
181.5	0.483667	0.446333	0.452833	0.462333	0.451167	0.4115	0.379667	0.340833	0.301333	0.251833	0.1995	0.159667		1	1	1	1	1	1	1	1	1	1	1	1			0.483667	0.446333	0.452833	0.462333	0.451167	0.4115	0.379667	0.340833	0.301333	0.251833	0.1995	0.159667			124	124	124	124	124	124	124	124
183	0.473667	0.448333	0.457833	0.457333	0.446167	0.4075	0.390667	0.341833	0.305333	0.252833	0.2045	0.157667		1	1	1	1	1	1	1	1	1	1	1	1			0.473667	0.448333	0.457833	0.457333	0.446167	0.4075	0.390667	0.341833	0.305333	0.252833	0.2045	0.157667			125	125	125	125	125	125	125	125
184.5	0.484667	0.448333	0.463833	0.459333	0.448167	0.4105	0.389667	0.344833	0.307333	0.253833	0.2045	0.162667		1	1	1	1	1	1	1	1	1	1	1	1			0.484667	0.448333	0.463833	0.459333	0.448167	0.4105	0.389667	0.344833	0.307333	0.253833	0.2045	0.162667			126	126	126	126	126	126	126	126
186	0.488667	0.459333	0.461833	0.469333	0.456167	0.4115	0.386667	0.350833	0.306333	0.246833	0.2065	0.165667		1	1	1	1	1	1	1	1	1	1	1	1			0.488667	0.459333	0.461833	0.469333	0.456167	0.4115	0.386667	0.350833	0.306333	0.246833	0.2065	0.165667			127	127	127	127	127	127	127	127
187.5	0.486667	0.468333	0.474833	0.467333	0.461167	0.4265	0.389667	0.358833	0.313333	0.253833	0.2055	0.162667		1	1	1	1	1	1	1	1	1	1	1	1			0.486667	0.468333	0.474833	0.467333	0.461167	0.4265	0.389667	0.358833	0.313333	0.253833	0.2055	0.162667			128	128	128	128	128	128	128	128
189	0.479667	0.459333	0.479833	0.469333	0.470167	0.4245	0.396667	0.359833	0.320333	0.255833	0.2125	0.168667		1	1	1	1	1	1	1	1	1	1	1	1			0.479667	0.459333	0.479833	0.469333	0.470167	0.4245	0.396667	0.359833	0.320333	0.255833	0.2125	0.168667			129	129	129	129	129	129	129	129
190.5	0.491667	0.471333	0.475833	0.474333	0.469167	0.4335	0.395667	0.357833	0.313333	0.261833	0.2155	0.167667		1	1	1	1	1	1	1	1	1	1	1	1			0.491667	0.471333	0.475833	0.474333	0.469167	0.4335	0.395667	0.357833	0.313333	0.261833	0.2155	0.167667			130	130	130	130	130	130	130	130
192	0.496667	0.461333	0.484833	0.476333	0.472167	0.4215	0.400667	0.355833	0.317333	0.256833	0.2115	0.169667		1	1	1	1	1	1	1	1	1	1	1	1			0.496667	0.461333	0.484833	0.476333	0.472167	0.4215	0.400667	0.355833	0.317333	0.256833	0.2115	0.169667			131	131	131	131	131	131	131	131
193.5	0.500667	0.472333	0.483833	0.471333	0.461167	0.4375	0.405667	0.365833	0.328333	0.260833	0.2175	0.172667		1	1	1	1	1	1	1	1	1	1	1	1			0.500667	0.472333	0.483833	0.471333	0.461167	0.4375	0.405667	0.365833	0.328333	0.260833	0.2175	0.172667			132	132	132	132	132	132	132	132
195	0.497667	0.471333	0.491833	0.479333	0.471167	0.4385	0.408667	0.372833	0.333333	0.262833	0.2215	0.176667		1	1	1	1	1	1	1	1	1	1	1	1			0.497667	0.471333	0.491833	0.479333	0.471167	0.4385	0.408667	0.372833	0.333333	0.262833	0.2215	0.176667			133	133	133	133	133	133	133	133
196.5	0.506667	0.473333	0.489833	0.482333	0.471167	0.4305	0.411667	0.362833	0.336333	0.268833	0.2215	0.172667		1	1	1	1	1	1	1	1	1	1	1	1			0.506667	0.473333	0.489833	0.482333	0.471167	0.4305	0.411667	0.362833	0.336333	0.268833	0.2215	0.172667			134	134	134	134	134	134	134	134
198	0.520667	0.481333	0.489833	0.483333	0.484167	0.4515	0.421667	0.363833	0.342333	0.274833	0.2255	0.182667		1	1	1	1	1	1	1	1	1	1	1	1			0.520667	0.481333	0.489833	0.483333	0.484167	0.4515	0.421667	0.363833	0.342333	0.274833	0.2255	0.182667			135	135	135	135	135	135	135	135
199.5	0.520667	0.486333	0.495833	0.488333	0.486167	0.4575	0.416667	0.378833	0.333333	0.271833	0.2265	0.178667		1	1	1	1	1	1	1	1	1	1	1	1			0.520667	0.486333	0.495833	0.488333	0.486167	0.4575	0.416667	0.378833	0.333333	0.271833	0.2265	0.178667			136	136	136	136	136	136	136	136
201	0.518667	0.481333	0.495833	0.495333	0.481167	0.4485	0.428667	0.376833	0.338333	0.272833	0.2295	0.179667		1	1	1	1	1	1	1	1	1	1	1	1			0.518667	0.481333	0.495833	0.495333	0.481167	0.4485	0.428667	0.376833	0.338333	0.272833	0.2295	0.179667			137	137	137	137	137	137	137	137
202.5	0.517667	0.490333	0.501833	0.492333	0.483167	0.4505	0.419667	0.384833	0.343333	0.276833	0.2285	0.178667		1	1	1	1	1	1	1	1	1	1	1	1			0.517667	0.490333	0.501833	0.492333	0.483167	0.4505	0.419667	0.384833	0.343333	0.276833	0.2285	0.178667			138	138	138	138	138	138	138	138
204	0.528667	0.484333	0.498833	0.505333	0.492167	0.4585	0.429667	0.383833	0.350333	0.275833	0.2275	0.182667		1	1	1	1	1	1	1	1	1	1	1	1			0.528667	0.484333	0.498833	0.505333	0.492167	0.4585	0.429667	0.383833	0.350333	0.275833	0.2275	0.182667			139	139	139	139	139	139	139	139
205.5	0.531667	0.488333	0.503833	0.500333	0.496167	0.4545	0.440667	0.385833	0.349333	0.281833	0.2385	0.186667		1	1	1	1	1	1	1	1	1	1	1	1			0.531667	0.488333	0.503833	0.500333	0.496167	0.4545	0.440667	0.385833	0.349333	0.281833	0.2385	0.186667			140	140	140	140	140	140	140	140
207	0.527667	0.493333	0.510833	0.509333	0.494167	0.4515	0.437667	0.394833	0.347333	0.287833	0.2335	0.189667		1	1	1	1	1	1	1	1	1	1	1	1			0.527667	0.493333	0.510833	0.509333	0.494167	0.4515	0.437667	0.394833	0.347333	0.287833	0.2335	0.189667			141	141	141	141	141	141	141	141
208.5	0.529667	0.499333	0.509833	0.502333	0.497167	0.4675	0.437667	0.390833	0.355333	0.283833	0.2345	0.189667		1	1	1	1	1	1	1	1	1	1	1	1			0.529667	0.499333	0.509833	0.502333	0.497167	0.4675	0.437667	0.390833	0.355333	0.283833	0.2345	0.189667			142	142	142	142	142	142	142	142
210	0.532667	0.499333	0.508833	0.502333	0.507167	0.4755	0.438667	0.394833	0.360333	0.287833	0.2385	0.190667		1	1	1	1	1	1	1	1	1	1	1	1			0.532667	0.499333	0.508833	0.502333	0.507167	0.4755	0.438667	0.394833	0.360333	0.287833	0.2385	0.190667			143	143	143	143	143	143	143	143
211.5	0.539667	0.502333	0.518833	0.509333	0.503167	0.4715	0.440667	0.400833	0.359333	0.291833	0.2425	0.195667		1	1	1	1	1	1	1	1	1	1	1	1			0.539667	0.502333	0.518833	0.509333	0.503167	0.4715	0.440667	0.400833	0.359333	0.291833	0.2425	0.195667			144	144	144	144	144	144	144	144
213	0.546667	0.498333	0.514833	0.510333	0.505167	0.4765	0.447667	0.399833	0.356333	0.293833	0.2405	0.198667		1	1	1	1	1	1	1	1	1	1	1	1			0.546667	0.498333	0.514833	0.510333	0.505167	0.4765	0.447667	0.399833	0.356333	0.293833	0.2405	0.198667			145	145	145	145	145	145	145	145
214.5	0.548667	0.504333	0.520833	0.512333	0.511167	0.4765	0.443667	0.412833	0.359333	0.290833	0.2405	0.188667		1	1	1	1	1	1	1	1	1	1	1	1			0.548667	0.504333	0.520833	0.512333	0.511167	0.4765	0.443667	0.412833	0.359333	0.290833	0.2405	0.188667			146	146	146	146	146	146	146	146
216	0.551667	0.509333	0.530833	0.520333	0.517167	0.4735	0.448667	0.405833	0.364333	0.296833	0.2495	0.198667		1	1	1	1	1	1	1	1	1	1	1	1			0.551667	0.509333	0.530833	0.520333	0.517167	0.4735	0.448667	0.405833	0.364333	0.296833	0.2495	0.198667			147	147	147	147	147	147	147	147
217.5	0.549667	0.510333	0.532833	0.521333	0.515167	0.4845	0.447667	0.406833	0.360333	0.302833	0.2505	0.203667		1	1	1	1	1	1	1	1	1	1	1	1			0.549667	0.510333	0.532833	0.521333	0.515167	0.4845	0.447667	0.406833	0.360333	0.302833	0.2505	0.203667			148	148	148	148	148	148	148	148
219	0.551667	0.512333	0.529833	0.528333	0.522167	0.4855	0.460667	0.417833	0.365333	0.300833	0.2475	0.201667		1	1	1	1	1	1	1	1	1	1	1	1			0.551667	0.512333	0.529833	0.528333	0.522167	0.4855	0.460667	0.417833	0.365333	0.300833	0.2475	0.201667			149	149	149	149	149	149	149	149
220.5	0.553667	0.521333	0.527833	0.532333	0.522167	0.4895	0.460667	0.417833	0.365333	0.302833	0.2505	0.201667		1	1	1	1	1	1	1	1	1	1	1	1			0.553667	0.521333	0.527833	0.532333	0.522167	0.4895	0.460667	0.417833	0.365333	0.302833	0.2505	0.201667			150	150	150	150	150	150	150	150
222	0.561667	0.518333	0.532833	0.536333	0.526167	0.4915	0.462667	0.414833	0.363333	0.301833	0.2465	0.201667		1	1	1	1	1	1	1	1	1	1	1	1			0.561667	0.518333	0.532833	0.536333	0.526167	0.4915	0.462667	0.414833	0.363333	0.301833	0.2465	0.201667			151	151	151	151	151	151	151	151
223.5	0.556667	0.524333	0.541833	0.537333	0.528167	0.4915	0.470667	0.425833	0.376333	0.304833	0.2545	0.207667		1	1	1	1	1	1	1	1	1	1	1	1			0.556667	0.524333	0.541833	0.537333	0.528167	0.4915	0.470667	0.425833	0.376333	0.304833	0.2545	0.207667			152	152	152	152	152	152	152	152
225	0.563667	0.524333	0.544833	0.535333	0.529167	0.4955	0.471667	0.422833	0.376333	0.315833	0.2555	0.207667		1	1	1	1	1	1	1	1	1	1	1	1			0.563667	0.524333	0.544833	0.535333	0.529167	0.4955	0.471667	0.422833	0.376333	0.315833	0.2555	0.207667			153	153	153	153	153	153	153	153
226.5	0.563667	0.519333	0.545833	0.543333	0.536167	0.4975	0.471667	0.430833	0.376333	0.314833	0.2555	0.211667		1	1	1	1	1	1	1	1	1	1	1	1			0.563667	0.519333	0.545833	0.543333	0.536167	0.4975	0.471667	0.430833	0.376333	0.314833	0.2555	0.211667			154	154	154	154	154	154	154	154
228	0.559667	0.525333	0.542833	0.542333	0.538167	0.4935	0.474667	0.425833	0.384333	0.318833	0.2585	0.210667		1	1	1	1	1	1	1	1	1	1	1	1			0.559667	0.525333	0.542833	0.542333	0.538167	0.4935	0.474667	0.425833	0.384333	0.318833	0.2585	0.210667			155	155	155	155	155	155	155	155
229.5	0.561667	0.530333	0.552833	0.542333	0.538167	0.5005	0.474667	0.425833	0.379333	0.315833	0.2595	0.210667		1	1	1	1	1	1	1	1	1	1	1	1			0.561667	0.530333	0.552833	0.542333	0.538167	0.5005	0.474667	0.425833	0.379333	0.315833	0.2595	0.210667			156	156	156	156	156	156	156	156
231	0.566667	0.523333	0.558833	0.549333	0.541167	0.4995	0.472667	0.434833	0.386333	0.322833	0.2625	0.213667		1	1	1	1	1	1	1	1	1	1	1	1			0.566667	0.523333	0.558833	0.549333	0.541167	0.4995	0.472667	0.434833	0.386333	0.322833	0.2625	0.213667			157	157	157	157	157	157	157	157
232.5	0.568667	0.530333	0.558833	0.545333	0.536167	0.4945	0.473667	0.431833	0.389333	0.315833	0.2595	0.215667		1	1	1	1	1	1	1	1	1	1	1	1			0.568667	0.530333	0.558833	0.545333	0.536167	0.4945	0.473667	0.431833	0.389333	0.315833	0.2595	0.215667			158	158	158	158	158	158	158	158
234	0.566667	0.538333	0.562833	0.552333	0.540167	0.4985	0.476667	0.436833	0.389333	0.323833	0.2635	0.209667		1	1	1	1	1	1	1	1	1	1	1	1			0.566667	0.538333	0.562833	0.552333	0.540167	0.4985	0.476667	0.436833	0.389333	0.323833	0.2635	0.209667			159	159	159	159	159	159	159	159
235.5	0.569667	0.541333	0.560833	0.552333	0.544167	0.5055	0.475667	0.436833	0.394333	0.321833	0.2665	0.212667		1	1	1	1	1	1	1	1	1	1	1	1			0.569667	0.541333	0.560833	0.552333	0.544167	0.5055	0.475667	0.436833	0.394333	0.321833	0.2665	0.212667			160	160	160	160	160	160	160	160
237	0.573667	0.544333	0.561833	0.550333	0.544167	0.5075	0.482667	0.441833	0.395333	0.318833	0.2675	0.220667		1	1	1	1	1	1	1	1	1	1	1	1			0.573667	0.544333	0.561833	0.550333	0.544167	0.5075	0.482667	0.441833	0.395333	0.318833	0.2675	0.220667			161	161	161	161	161	161	161	161
238.5	0.575667	0.546333	0.565833	0.558333	0.546167	0.5075	0.478667	0.443833	0.392333	0.328833	0.2685	0.218667		1	1	1	1	1	1	1	1	1	1	1	1			0.575667	0.546333	0.565833	0.558333	0.546167	0.5075	0.478667	0.443833	0.392333	0.328833	0.2685	0.218667			162	162	162	162	162	162	162	162
240	0.579667	0.545333	0.564833	0.556333	0.546167	0.5115	0.484667	0.445833	0.395333	0.330833	0.2765	0.214667		1	1	1	1	1	1	1	1	1	1	1	1			0.579667	0.545333	0.564833	0.556333	0.546167	0.5115	0.484667	0.445833	0.395333	0.330833	0.2765	0.214667			163	163	163	163	163	163	163	163
241.5	0.580667	0.546333	0.566833	0.555333	0.552167	0.5205	0.482667	0.450833	0.397333	0.337833	0.2735	0.223667		1	1	1	1	1	1	1	1	1	1	1	1			0.580667	0.546333	0.566833	0.555333	0.552167	0.5205	0.482667	0.450833	0.397333	0.337833	0.2735	0.223667			164	164	164	164	164	164	164	164
243	0.582667	0.548333	0.574833	0.558333	0.555167	0.5205	0.487667	0.444833	0.401333	0.335833	0.2735	0.221667		1	1	1	1	1	1	1	1	1	1	1	1			0.582667	0.548333	0.574833	0.558333	0.555167	0.5205	0.487667	0.444833	0.401333	0.335833	0.2735	0.221667			165	165	165	165	165	165	165	165
244.5	0.584667	0.558333	0.574833	0.558333	0.552167	0.5215	0.489667	0.449833	0.407333	0.340833	0.2775	0.224667		1	1	1	1	1	1	1	1	1	1	1	1			0.584667	0.558333	0.574833	0.558333	0.552167	0.5215	0.489667	0.449833	0.407333	0.340833	0.2775	0.224667			166	166	166	166	166	166	166	166
246	0.584667	0.551333	0.578833	0.566333	0.554167	0.5255	0.495667	0.451833	0.405333	0.340833	0.2765	0.227667		1	1	1	1	1	1	1	1	1	1	1	1			0.584667	0.551333	0.578833	0.566333	0.554167	0.5255	0.495667	0.451833	0.405333	0.340833	0.2765	0.227667			167	167	167	167	167	167	167	167
247.5	0.585667	0.548333	0.581833	0.562333	0.562167	0.5225	0.498667	0.455833	0.412333	0.345833	0.2755	0.226667		1	1	1	1	1	1	1	1	1	1	1	1			0.585667	0.548333	0.581833	0.562333	0.562167	0.5225	0.498667	0.455833	0.412333	0.345833	0.2755	0.226667			168	168	168	168	168	168	168	168
249	0.585667	0.555333	0.579833	0.568333	0.561167	0.5315	0.496667	0.453833	0.408333	0.348833	0.2805	0.226667		1	1	1	1	1	1	1	1	1	1	1	1			0.585667	0.555333	0.579833	0.568333	0.561167	0.5315	0.496667	0.453833	0.408333	0.348833	0.2805	0.226667			169	169	169	169	169	169	169	169
250.5	0.590667	0.554333	0.579833	0.569333	0.565167	0.5305	0.495667	0.456833	0.411333	0.346833	0.2815	0.233667		1	1	1	1	1	1	1	1	1	1	1	1			0.590667	0.554333	0.579833	0.569333	0.565167	0.5305	0.495667	0.456833	0.411333	0.346833	0.2815	0.233667			170	170	170	170	170	170	170	170
252	0.597667	0.557333	0.585833	0.571333	0.567167	0.5365	0.501667	0.462833	0.414333	0.350833	0.2845	0.227667		1	1	1	1	1	1	1	1	1	1	1	1			0.597667	0.557333	0.585833	0.571333	0.567167	0.5365	0.501667	0.462833	0.414333	0.350833	0.2845	0.227667			171	171	171	171	171	171	171	171
253.5	0.602667	0.565333	0.586833	0.571333	0.568167	0.5355	0.502667	0.462833	0.413333	0.347833	0.2865	0.228667		1	1	1	1	1	1	1	1	1	1	1	1			0.602667	0.565333	0.586833	0.571333	0.568167	0.5355	0.502667	0.462833	0.413333	0.347833	0.2865	0.228667			172	172	172	172	172	172	172	172
255	0.600667	0.563333	0.585833	0.572333	0.564167	0.5355	0.502667	0.462833	0.422333	0.352833	0.2875	0.229667		1	1	1	1	1	1	1	1	1	1	1	1			0.600667	0.563333	0.585833	0.572333	0.564167	0.5355	0.502667	0.462833	0.422333	0.352833	0.2875	0.229667			173	173	173	173	173	173	173	173
256.5	0.600667	0.564333	0.589833	0.579333	0.565167	0.5325	0.504667	0.464833	0.423333	0.356833	0.2875	0.234667		1	1	1	1	1	1	1	1	1	1	1	1			0.600667	0.564333	0.589833	0.579333	0.565167	0.5325	0.504667	0.464833	0.423333	0.356833	0.2875	0.234667			174	174	174	174	174	174	174	174
258	0.604667	0.561333	0.591833	0.578333	0.569167	0.5385	0.509667	0.467833	0.424333	0.356833	0.2905	0.238667		1	1	1	1	1	1	1	1	1	1	1	1			0.604667	0.561333	0.591833	0.578333	0.569167	0.5385	0.509667	0.467833	0.424333	0.356833	0.2905	0.238667			175	175	175	175	175	175	175	175
259.5	0.607667	0.564333	0.595833	0.580333	0.574167	0.5415	0.508667	0.469833	0.418333	0.355833	0.2905	0.235667		1	1	1	1	1	1	1	1	1	1	1	1			0.607667	0.564333	0.595833	0.580333	0.574167	0.5415	0.508667	0.469833	0.418333	0.355833	0.2905	0.235667			176	176	176	176	176	176	176	176
261	0.606667	0.571333	0.592833	0.580333	0.573167	0.5355	0.511667	0.470833	0.423333	0.359833	0.2975	0.235667		1	1	1	1	1	1	1	1	1	1	1	1			0.606667	0.571333	0.592833	0.580333	0.573167	0.5355	0.511667	0.470833	0.423333	0.359833	0.2975	0.235667			177	177	177	177	177	177	177	177
262.5	0.609667	0.569333	0.596833	0.584333	0.577167	0.5445	0.511667	0.473833	0.431333	0.359833	0.2955	0.233667		1	1	1	1	1	1	1	1	1	1	1	1			0.609667	0.569333	0.596833	0.584333	0.577167	0.5445	0.511667	0.473833	0.431333	0.359833	0.2955	0.233667			178	178	178	178	178	178	178	178
264	0.607667	0.571333	0.593833	0.582333	0.576167	0.5455	0.512667	0.471833	0.425333	0.358833	0.2975	0.237667		1	1	1	1	1	1	1	1	1	1	1	1			0.607667	0.571333	0.593833	0.582333	0.576167	0.5455	0.512667	0.471833	0.425333	0.358833	0.2975	0.237667			179	179	179	179	179	179	179	179
265.5	0.609667	0.569333	0.596833	0.582333	0.578167	0.5505	0.517667	0.472833	0.427333	0.362833	0.3005	0.240667		1	1	1	1	1	1	1	1	1	1	1	1			0.609667	0.569333	0.596833	0.582333	0.578167	0.5505	0.517667	0.472833	0.427333	0.362833	0.3005	0.240667			180	180	180	180	180	180	180	180
267	0.612667	0.571333	0.598833	0.584333	0.581167	0.5505	0.516667	0.475833	0.430333	0.361833	0.3035	0.242667		1	1	1	1	1	1	1	1	1	1	1	1			0.612667	0.571333	0.598833	0.584333	0.581167	0.5505	0.516667	0.475833	0.430333	0.361833	0.3035	0.242667			181	181	181	181	181	181	181	181
268.5	0.611667	0.574333	0.599833	0.587333	0.579167	0.5505	0.517667	0.475833	0.431333	0.364833	0.3045	0.236667		1	1	1	1	1	1	1	1	1	1	1	1			0.611667	0.574333	0.599833	0.587333	0.579167	0.5505	0.517667	0.475833	0.431333	0.364833	0.3045	0.236667			182	182	182	182	182	182	182	182
270	0.612667	0.576333	0.597833	0.592333	0.586167	0.5495	0.520667	0.476833	0.431333	0.364833	0.3065	0.241667		1	1	1	1	1	1	1	1	1	1	1	1			0.612667	0.576333	0.597833	0.592333	0.586167	0.5495	0.520667	0.476833	0.431333	0.364833	0.3065	0.241667			183	183	183	183	183	183	183	183
[truncated: 54 more columns]

## Sheet: N-only_inositol
	2020-10-21 N(mono) 50 uM GSSG 500 uM EDTA 1 mM PIPES 10 mM pH6.7 NaCl 150 mM T = 44 C inositol X mM													2020-10-21 N(mono) 50 uM GSSG 500 uM EDTA 1 mM PIPES 10 mM pH6.7 NaCl 150 mM T = 44 C inositol X mM														2020-10-21 N(mono) 50 uM GSSG 500 uM EDTA 1 mM PIPES 10 mM pH6.7 NaCl 150 mM T = 44 C inositol X mM														2020-10-21 N(mono) 50 uM GSSG 500 uM EDTA 1 mM PIPES 10 mM pH6.7 NaCl 150 mM T = 44 C inositol X mM
	0	10	20	30	40	60	80	100	130	160	200	0		0	10	20	30	40	60	80	100	130	160	200	0			0	10	20	30	40	60	80	100	130	160	200	0			0	10	20	30	40	60	80	100
0	-0.0065	-0.00116667	-0.000833333	-0.001	0.0005	0.000833333	-0.001	0	-0.000833333	-0.000333333	-0.00116667	0		0	0	0	0	0	0	0	0	0	0	0	0			0	0	0	0	0	0	0	0	0	0	0	0			0	0	0	0	0	0	0	0
1.5	-0.0065	-0.00116667	-0.000833333	-0.001	0.0005	-0.000166667	-0.001	-0.001	-0.000833333	-0.000333333	-0.00116667	-0.001		0	0	0	0	0	0	0	0	0	0	0	0			0	0	0	0	0	0	0	0	0	0	0	0			0	0	0	0	0	0	0	0
3	-0.0065	-0.00116667	-0.000833333	0	0.0005	0.000833333	0	-0.001	0.000166667	-0.00133333	-0.000166667	0		0	0	0	0	0	0	0	0	0	0	0	0			0	0	0	0	0	0	0	0	0	0	0	0			0	0	0	0	0	0	0	0
4.5	-0.0055	-0.00116667	-0.000833333	-0.001	-0.0005	-0.00116667	-0.002	-0.001	-0.000833333	-0.00133333	-0.000166667	0		0	0	0	0	0	0	0	0	0	0	0	0			0	0	0	0	0	0	0	0	0	0	0	0			0	0	0	0	0	0	0	0
6	-0.0035	-0.00116667	0.000166667	0	0.0005	0.000833333	0	0	0.000166667	0.000666667	-0.000166667	0		0	0	0	0	0	0	0	0	0	0	0	0			0	0	0	0	0	0	0	0	0	0	0	0			0	0	0	0	0	0	0	0
7.5	-0.0025	-0.00216667	0.000166667	0	0.0005	-0.000166667	0	-0.001	0.000166667	0.000666667	-0.00116667	-0.001		0	0	0	0	0	0	0	0	0	0	0	0			0	0	0	0	0	0	0	0	0	0	0	0			0	0	0	0	0	0	0	0
9	-0.0025	-0.00116667	0.000166667	-0.001	-0.0005	-0.000166667	-0.001	-0.001	-0.000833333	-0.000333333	-0.00116667	-0.001		0	0	0	0	0	0	0	0	0	0	0	0			0	0	0	0	0	0	0	0	0	0	0	0			0	0	0	0	0	0	0	0
10.5	-0.0005	0.000833333	0.000166667	0	-0.0005	-0.000166667	0	0	0.000166667	-0.000333333	-0.000166667	0		0	0	0	0	0	0	0	0	0	0	0	0			0	0	0	0	0	0	0	0	0	0	0	0			0	0	0	0	0	0	0	0
12	0.0015	0.000833333	-0.000833333	0	0.0005	-0.000166667	0.001	0.001	0.00116667	-0.000333333	0.000833333	0.001		0	0	0	0	0	0	0	0	0	0	0	0			0	0	0	0	0	0	0	0	0	0	0	0			0	0	0	0	0	0	0	0
13.5	0.0025	0.000833333	0.00116667	0.001	0.0005	0.000833333	0	0.002	0.000166667	0.000666667	0.00183333	0.001		0	0	0	0	0	0	0	0	0	0	0	0			0	0	0	0	0	0	0	0	0	0	0	0			0	0	0	0	0	0	0	0
15	0.0015	0.000833333	-0.000833333	0	-0.0005	-0.000166667	0	-0.001	-0.000833333	-0.000333333	-0.000166667	0		0	0	0	0	0	0	0	0	0	0	0	0			0	0	0	0	0	0	0	0	0	0	0	0			0	0	0	0	0	0	0	0
16.5	0.0035	0.000833333	-0.000833333	0	0.0005	-0.00116667	0.001	0	-0.000833333	-0.000333333	-0.00116667	0.001		0	0	0	0	0	0	0	0	0	0	0	0			0	0	0	0	0	0	0	0	0	0	0	0			0	0	0	0	0	0	0	0
18	0.0045	0.000833333	0.000166667	0.001	0.0005	0.000833333	0.001	0.002	0.000166667	0.000666667	0.000833333	0.002		0	0	0	0	0	0	0	0	0	0	0	0			0	0	0	0	0	0	0	0	0	0	0	0			0	0	0	0	0	0	0	0
19.5	0.0045	0.00183333	0.000166667	0.001	0.0005	-0.000166667	0.001	0.001	0.000166667	-0.000333333	-0.000166667	0.001		0	0	0	0	0	0	0	0	0	0	0	0			0	0	0	0	0	0	0	0	0	0	0	0			0	0	0	0	0	0	0	0
21	0.0045	0.000833333	0.000166667	0	-0.0005	-0.000166667	0	0.002	0.00116667	-0.000333333	-0.000166667	0		0	0	0	0	0	0	0	0	0	0	0	0			0	0	0	0	0	0	0	0	0	0	0	0			0	0	0	0	0	0	0	0
22.5	0.0035	0.000833333	0.000166667	-0.001	-0.0005	-0.000166667	0.001	0	0.000166667	-0.000333333	-0.00116667	0.001		0	0	0	0	0	0	0	0	0	0	0	0			0	0	0	0	0	0	0	0	0	0	0	0			0	0	0	0	0	0	0	0
24	0.0065	0.000833333	0.000166667	0	-0.0015	-0.000166667	0.002	0.001	0.00216667	-0.000333333	0.000833333	0.001		0	0	0	0	0	0	0	0	0	0	0	0			0	0	0	0	0	0	0	0	0	0	0	0			0	0	0	0	0	0	0	0
25.5	0.0085	0.00283333	0.00116667	0.002	0.0015	0.000833333	0.002	0.002	0.00316667	0.00166667	-0.000166667	0.003		0	0	0	0	0	0	0	0	0	0	0	0			0	0	0	0	0	0	0	0	0	0	0	0			0	0	0	0	0	0	0	0
27	0.0065	0.000833333	-0.000833333	0.001	-0.0015	-0.000166667	0.001	0	0.00116667	0.000666667	0.000833333	0.001		0	0	0	0	0	0	0	0	0	0	0	0			0	0	0	0	0	0	0	0	0	0	0	0			0	0	0	0	0	0	0	0
28.5	0.0075	0.00283333	0.00116667	0.001	0.0005	0.000833333	0.001	0.001	0.00116667	0.00166667	0.000833333	0.001		0	0	0	0	0	0	0	0	0	0	0	0			0	0	0	0	0	0	0	0	0	0	0	0			0	0	0	0	0	0	0	0
30	0.0085	0.00283333	0.000166667	0.002	0.0005	0.00183333	0.002	0.002	0.00216667	0.000666667	0.00183333	0.003		0	0	0	0	0	0	0	0	0	0	0	0			0	0	0	0	0	0	0	0	0	0	0	0			0	0	0	0	0	0	0	0
31.5	0.0095	0.00183333	0.000166667	0	-0.0015	0.000833333	0.001	0.002	0.00116667	0.000666667	-0.000166667	0		0	0	0	0	0	0	0	0	0	0	0	0			0	0	0	0	0	0	0	0	0	0	0	0			0	0	0	0	0	0	0	0
33	0.0085	0.00283333	0.00116667	0.002	0.0005	0.000833333	0.003	0.002	0.00316667	0.00266667	0.000833333	0.002		0	0	0	0	0	0	0	0	0	0	0	0			0	0	0	0	0	0	0	0	0	0	0	0			0	0	0	0	0	0	0	0
34.5	0.0095	0.00183333	0.000166667	0.002	-0.0005	-0.000166667	0.003	0.002	0.00216667	0.000666667	0.000833333	0.002		0	0	0	0	0	0	0	0	0	0	0	0			0	0	0	0	0	0	0	0	0	0	0	0			0	0	0	0	0	0	0	0
36	0.0105	0.00383333	0.00216667	0.003	0.0005	0.00183333	0.003	0.003	0.00416667	0.00266667	0.00183333	0.003		0	0	0	0	0	0	0	0	0	0	0	0			0	0	0	0	0	0	0	0	0	0	0	0			0	0	0	0	0	0	0	0
37.5	0.0085	0.00283333	0.00116667	0.002	-0.0005	0.000833333	0.002	0.002	0.00116667	0.000666667	-0.000166667	0.002		0	0	0	0	0	0	0	0	0	0	0	0			0	0	0	0	0	0	0	0	0	0	0	0			0	0	0	0	0	0	0	0
39	0.0115	0.00283333	0.00216667	0.002	0.0005	0.00183333	0.003	0.004	0.00416667	0.00266667	0.000833333	0.003		0	0	0	0	0	0	0	0	0	0	0	0			0	0	0	0	0	0	0	0	0	0	0	0			0	0	0	0	0	0	0	0
40.5	0.0115	0.00283333	0.00316667	0.002	0.0005	0.00183333	0.003	0.003	0.00416667	0.00166667	0.00183333	0.003		0	0	0	0	0	0	0	0	0	0	0	0			0	0	0	0	0	0	0	0	0	0	0	0			0	0	0	0	0	0	0	0
42	0.0125	0.00283333	0.00216667	0.002	0.0005	0.00183333	0.003	0.002	0.00316667	0.000666667	0.000833333	0.002		0	0	0	0	0	0	0	0	0	0	0	0			0	0	0	0	0	0	0	0	0	0	0	0			0	0	0	0	0	0	0	0
43.5	0.0135	0.00383333	0.00216667	0.003	0.0005	0.00283333	0.005	0.004	0.00516667	0.00266667	0.00183333	0.005		0	0	0	0	0	0	0	0	0	0	0	0			0	0	0	0	0	0	0	0	0	0	0	0			0	0	0	0	0	0	0	0
45	0.0125	0.00483333	0.00316667	0.004	0.0005	0.00183333	0.004	0.004	0.00416667	0.00166667	0.00183333	0.004		0	0	0	0	0	0	0	0	0	0	0	0			0	0	0	0	0	0	0	0	0	0	0	0			0	0	0	0	0	0	0	0
46.5	0.0135	0.00383333	0.00316667	0.003	0.0005	0.00283333	0.004	0.002	0.00316667	0.000666667	0.00183333	0.005		0	0	0	0	0	0	0	0	0	0	0	0			0	0	0	0	0	0	0	0	0	0	0	0			0	0	0	0	0	0	0	0
48	0.0145	0.00483333	0.00216667	0.003	0.0015	0.00283333	0.005	0.003	0.00316667	0.00266667	0.000833333	0.006		0	0	0	0	0	0	0	0	0	0	0	0			0	0	0	0	0	0	0	0	0	0	0	0			0	0	0	0	0	0	0	0
49.5	0.0155	0.00583333	0.00516667	0.006	0.0045	0.00483333	0.007	0.005	0.00516667	0.00466667	0.00383333	0.009		0	0	0	0	0	0	0	0	0	0	0	0			0	0	0	0	0	0	0	0	0	0	0	0			0	0	0	0	0	0	0	0
51	0.0175	0.00783333	0.00516667	0.007	0.0055	0.00583333	0.008	0.006	0.00716667	0.00466667	0.00383333	0.01		0	0	0	0	0	0	0	0	0	0	0	0			0	0	0	0	0	0	0	0	0	0	0	0			0	0	0	0	0	0	0	0
52.5	0.0165	0.00783333	0.00516667	0.006	0.0045	0.00483333	0.006	0.005	0.00516667	0.00266667	0.00183333	0.009		0	0	0	0	0	0	0	0	0	0	0	0			0	0	0	0	0	0	0	0	0	0	0	0			0	0	0	0	0	0	0	0
54	0.0175	0.00783333	0.00616667	0.008	0.0055	0.00683333	0.009	0.006	0.00616667	0.00266667	0.00283333	0.01		0	0	0	0	0	0	0	0	0	0	0	0			0	0	0	0	0	0	0	0	0	0	0	0			0	0	0	0	0	0	0	0
55.5	0.0185	0.00983333	0.0101667	0.009	0.0065	0.00783333	0.01	0.006	0.00716667	0.00466667	0.00383333	0.012		0	0	0	0	0	0	0	0	0	0	0	0			0	0	0	0	0	0	0	0	0	0	0	0			0	0	0	0	0	0	0	0
57	0.0195	0.00983333	0.00816667	0.008	0.0055	0.00683333	0.008	0.007	0.00716667	0.00566667	0.00283333	0.011		0	0	0	0	0	0	0	0	0	0	0	0			0	0	0	0	0	0	0	0	0	0	0	0			0	0	0	0	0	0	0	0
58.5	0.0195	0.0108333	0.0101667	0.011	0.0075	0.00783333	0.011	0.007	0.00716667	0.00566667	0.00383333	0.013		0	0	0	0	0	0	0	0	0	0	0	0			0	0	0	0	0	0	0	0	0	0	0	0			0	0	0	0	0	0	0	0
60	0.0215	0.0108333	0.0101667	0.011	0.0085	0.00883333	0.011	0.008	0.00816667	0.00566667	0.00383333	0.014		0	0	0	0	0	0	0	0	0	0	0	0			0	0	0	0	0	0	0	0	0	0	0	0			0	0	0	0	0	0	0	0
61.5	0.0235	0.0118333	0.0101667	0.012	0.0085	0.00883333	0.011	0.008	0.00816667	0.00566667	0.00383333	0.016		0	0	0	0	0	0	0	0	0	0	0	0			0	0	0	0	0	0	0	0	0	0	0	0			0	0	0	0	0	0	0	0
63	0.0235	0.0128333	0.0141667	0.014	0.0105	0.0108333	0.013	0.01	0.0101667	0.00666667	0.00383333	0.018		0	0	0	0	0	0	0	0	0	0	0	0			0	0	0	0	0	0	0	0	0	0	0	0			0	0	0	0	0	0	0	0
64.5	0.0265	0.0138333	0.0141667	0.015	0.0115	0.0118333	0.014	0.011	0.0111667	0.00666667	0.00483333	0.018		1	0	0	0	0	0	0	0	0	0	0	0			0.0265	0	0	0	0	0	0	0	0	0	0	0			46	0	0	0	0	0	0	0
66	0.0265	0.0158333	0.0151667	0.016	0.0135	0.0118333	0.015	0.012	0.0111667	0.00766667	0.00483333	0.019		1	0	0	0	0	0	0	0	0	0	0	0			0.0265	0	0	0	0	0	0	0	0	0	0	0			47	0	0	0	0	0	0	0
67.5	0.0275	0.0148333	0.0151667	0.016	0.0135	0.0128333	0.015	0.011	0.0111667	0.00666667	0.00483333	0.02		1	0	0	0	0	0	0	0	0	0	0	0			0.0275	0	0	0	0	0	0	0	0	0	0	0			48	0	0	0	0	0	0	0
69	0.0295	0.0178333	0.0191667	0.019	0.0145	0.0148333	0.017	0.013	0.0141667	0.00966667	0.00683333	0.022		1	0	0	0	0	0	0	0	0	0	0	0			0.0295	0	0	0	0	0	0	0	0	0	0	0			49	0	0	0	0	0	0	0
70.5	0.0305	0.0178333	0.0171667	0.02	0.0155	0.0158333	0.017	0.013	0.0141667	0.00966667	0.00683333	0.022		1	0	0	0	0	0	0	0	0	0	0	0			0.0305	0	0	0	0	0	0	0	0	0	0	0			50	0	0	0	0	0	0	0
72	0.0315	0.0198333	0.0181667	0.02	0.0165	0.0158333	0.019	0.015	0.0151667	0.00966667	0.00683333	0.023		1	0	0	0	0	0	0	0	0	0	0	0			0.0315	0	0	0	0	0	0	0	0	0	0	0			51	0	0	0	0	0	0	0
73.5	0.0315	0.0198333	0.0181667	0.022	0.0175	0.0188333	0.019	0.014	0.0151667	0.0106667	0.00683333	0.024		1	0	0	0	0	0	0	0	0	0	0	0			0.0315	0	0	0	0	0	0	0	0	0	0	0			52	0	0	0	0	0	0	0
75	0.0325	0.0208333	0.0201667	0.022	0.0185	0.0178333	0.02	0.016	0.0161667	0.0106667	0.00683333	0.025		1	0	0	0	0	0	0	0	0	0	0	1			0.0325	0	0	0	0	0	0	0	0	0	0	0.025			53	0	0	0	0	0	0	0
76.5	0.0345	0.0248333	0.0231667	0.026	0.0205	0.0208333	0.022	0.018	0.0171667	0.0126667	0.00883333	0.028		1	0	0	1	0	0	0	0	0	0	0	1			0.0345	0	0	0.026	0	0	0	0	0	0	0	0.028			54	0	0	54	0	0	0	0
78	0.0345	0.0238333	0.0211667	0.024	0.0205	0.0198333	0.022	0.017	0.0171667	0.0116667	0.00883333	0.027		1	0	0	0	0	0	0	0	0	0	0	1			0.0345	0	0	0	0	0	0	0	0	0	0	0.027			55	0	0	0	0	0	0	0
79.5	0.0375	0.0258333	0.0241667	0.026	0.0225	0.0218333	0.025	0.019	0.0191667	0.0136667	0.00983333	0.03		1	1	0	1	0	0	1	0	0	0	0	1			0.0375	0.0258333	0	0.026	0	0	0.025	0	0	0	0	0.03			56	56	0	56	0	0	56	0
81	0.0385	0.0278333	0.0261667	0.03	0.0225	0.0218333	0.026	0.019	0.0191667	0.0146667	0.00883333	0.03		1	1	1	1	0	0	1	0	0	0	0	1			0.0385	0.0278333	0.0261667	0.03	0	0	0.026	0	0	0	0	0.03			57	57	57	57	0	0	57	0
82.5	0.0405	0.0278333	0.0261667	0.03	0.0245	0.0238333	0.027	0.021	0.0211667	0.0156667	0.00983333	0.033		1	1	1	1	0	0	1	0	0	0	0	1			0.0405	0.0278333	0.0261667	0.03	0	0	0.027	0	0	0	0	0.033			58	58	58	58	0	0	58	0
84	0.0415	0.0308333	0.0291667	0.032	0.0255	0.0258333	0.028	0.022	0.0221667	0.0156667	0.0118333	0.036		1	1	1	1	1	1	1	0	0	0	0	1			0.0415	0.0308333	0.0291667	0.032	0.0255	0.0258333	0.028	0	0	0	0	0.036			59	59	59	59	59	59	59	0
85.5	0.0435	0.0318333	0.0301667	0.032	0.0275	0.0258333	0.031	0.022	0.0221667	0.0166667	0.0108333	0.035		1	1	1	1	1	1	1	0	0	0	0	1			0.0435	0.0318333	0.0301667	0.032	0.0275	0.0258333	0.031	0	0	0	0	0.035			60	60	60	60	60	60	60	0
87	0.0415	0.0318333	0.0311667	0.033	0.0265	0.0268333	0.031	0.022	0.0231667	0.0166667	0.0108333	0.037		1	1	1	1	1	1	1	0	0	0	0	1			0.0415	0.0318333	0.0311667	0.033	0.0265	0.0268333	0.031	0	0	0	0	0.037			61	61	61	61	61	61	61	0
88.5	0.0445	0.0338333	0.0311667	0.035	0.0275	0.0288333	0.032	0.024	0.0241667	0.0186667	0.0118333	0.038		1	1	1	1	1	1	1	0	0	0	0	1			0.0445	0.0338333	0.0311667	0.035	0.0275	0.0288333	0.032	0	0	0	0	0.038			62	62	62	62	62	62	62	0
90	0.0465	0.0368333	0.0331667	0.037	0.0315	0.0298333	0.034	0.026	0.0261667	0.0196667	0.0128333	0.04		1	1	1	1	1	1	1	1	1	0	0	1			0.0465	0.0368333	0.0331667	0.037	0.0315	0.0298333	0.034	0.026	0.0261667	0	0	0.04			63	63	63	63	63	63	63	63
91.5	0.0475	0.0368333	0.0361667	0.037	0.0305	0.0308333	0.034	0.026	0.0261667	0.0196667	0.0128333	0.041		1	1	1	1	1	1	1	1	1	0	0	1			0.0475	0.0368333	0.0361667	0.037	0.0305	0.0308333	0.034	0.026	0.0261667	0	0	0.041			64	64	64	64	64	64	64	64
93	0.0495	0.0378333	0.0351667	0.037	0.0325	0.0308333	0.034	0.027	0.0271667	0.0206667	0.0138333	0.042		1	1	1	1	1	1	1	1	1	0	0	1			0.0495	0.0378333	0.0351667	0.037	0.0325	0.0308333	0.034	0.027	0.0271667	0	0	0.042			65	65	65	65	65	65	65	65
94.5	0.0495	0.0388333	0.0361667	0.039	0.0335	0.0328333	0.035	0.027	0.0271667	0.0206667	0.0148333	0.043		1	1	1	1	1	1	1	1	1	0	0	1			0.0495	0.0388333	0.0361667	0.039	0.0335	0.0328333	0.035	0.027	0.0271667	0	0	0.043			66	66	66	66	66	66	66	66
96	0.0525	0.0398333	0.0371667	0.041	0.0355	0.0338333	0.037	0.029	0.0301667	0.0206667	0.0148333	0.045		1	1	1	1	1	1	1	1	1	0	0	1			0.0525	0.0398333	0.0371667	0.041	0.0355	0.0338333	0.037	0.029	0.0301667	0	0	0.045			67	67	67	67	67	67	67	67
97.5	0.0535	0.0418333	0.0391667	0.042	0.0375	0.0348333	0.039	0.03	0.0291667	0.0216667	0.0148333	0.047		1	1	1	1	1	1	1	1	1	0	0	1			0.0535	0.0418333	0.0391667	0.042	0.0375	0.0348333	0.039	0.03	0.0291667	0	0	0.047			68	68	68	68	68	68	68	68
99	0.0545	0.0418333	0.0391667	0.042	0.0365	0.0358333	0.038	0.029	0.0301667	0.0226667	0.0138333	0.047		1	1	1	1	1	1	1	1	1	0	0	1			0.0545	0.0418333	0.0391667	0.042	0.0365	0.0358333	0.038	0.029	0.0301667	0	0	0.047			69	69	69	69	69	69	69	69
100.5	0.0565	0.0428333	0.0401667	0.045	0.0375	0.0378333	0.039	0.031	0.0291667	0.0236667	0.0148333	0.047		1	1	1	1	1	1	1	1	1	0	0	1			0.0565	0.0428333	0.0401667	0.045	0.0375	0.0378333	0.039	0.031	0.0291667	0	0	0.047			70	70	70	70	70	70	70	70
102	0.0565	0.0448333	0.0431667	0.046	0.0395	0.0388333	0.042	0.031	0.0321667	0.0236667	0.0168333	0.049		1	1	1	1	1	1	1	1	1	0	0	1			0.0565	0.0448333	0.0431667	0.046	0.0395	0.0388333	0.042	0.031	0.0321667	0	0	0.049			71	71	71	71	71	71	71	71
103.5	0.0585	0.0478333	0.0431667	0.047	0.0405	0.0388333	0.042	0.033	0.0331667	0.0246667	0.0168333	0.05		1	1	1	1	1	1	1	1	1	0	0	1			0.0585	0.0478333	0.0431667	0.047	0.0405	0.0388333	0.042	0.033	0.0331667	0	0	0.05			72	72	72	72	72	72	72	72
105	0.0595	0.0478333	0.0451667	0.048	0.0425	0.0398333	0.044	0.034	0.0331667	0.0256667	0.0178333	0.051		1	1	1	1	1	1	1	1	1	1	0	1			0.0595	0.0478333	0.0451667	0.048	0.0425	0.0398333	0.044	0.034	0.0331667	0.0256667	0	0.051			73	73	73	73	73	73	73	73
106.5	0.0615	0.0488333	0.0461667	0.049	0.0445	0.0418333	0.044	0.035	0.0341667	0.0256667	0.0168333	0.055		1	1	1	1	1	1	1	1	1	1	0	1			0.0615	0.0488333	0.0461667	0.049	0.0445	0.0418333	0.044	0.035	0.0341667	0.0256667	0	0.055			74	74	74	74	74	74	74	74
108	0.0625	0.0498333	0.0481667	0.051	0.0455	0.0418333	0.047	0.036	0.0351667	0.0266667	0.0178333	0.055		1	1	1	1	1	1	1	1	1	1	0	1			0.0625	0.0498333	0.0481667	0.051	0.0455	0.0418333	0.047	0.036	0.0351667	0.0266667	0	0.055			75	75	75	75	75	75	75	75
109.5	0.0645	0.0518333	0.0491667	0.052	0.0465	0.0438333	0.047	0.037	0.0361667	0.0276667	0.0188333	0.057		1	1	1	1	1	1	1	1	1	1	0	1			0.0645	0.0518333	0.0491667	0.052	0.0465	0.0438333	0.047	0.037	0.0361667	0.0276667	0	0.057			76	76	76	76	76	76	76	76
111	0.0655	0.0508333	0.0491667	0.054	0.0465	0.0448333	0.048	0.037	0.0371667	0.0276667	0.0198333	0.06		1	1	1	1	1	1	1	1	1	1	0	1			0.0655	0.0508333	0.0491667	0.054	0.0465	0.0448333	0.048	0.037	0.0371667	0.0276667	0	0.06			77	77	77	77	77	77	77	77
112.5	0.0685	0.0538333	0.0511667	0.056	0.0485	0.0468333	0.049	0.04	0.0381667	0.0286667	0.0198333	0.061		1	1	1	1	1	1	1	1	1	1	0	1			0.0685	0.0538333	0.0511667	0.056	0.0485	0.0468333	0.049	0.04	0.0381667	0.0286667	0	0.061			78	78	78	78	78	78	78	78
114	0.0695	0.0558333	0.0531667	0.057	0.0495	0.0488333	0.051	0.039	0.0401667	0.0306667	0.0228333	0.064		1	1	1	1	1	1	1	1	1	1	0	1			0.0695	0.0558333	0.0531667	0.057	0.0495	0.0488333	0.051	0.039	0.0401667	0.0306667	0	0.064			79	79	79	79	79	79	79	79
115.5	0.0705	0.0578333	0.0551667	0.058	0.0495	0.0508333	0.051	0.041	0.0401667	0.0306667	0.0218333	0.063		1	1	1	1	1	1	1	1	1	1	0	1			0.0705	0.0578333	0.0551667	0.058	0.0495	0.0508333	0.051	0.041	0.0401667	0.0306667	0	0.063			80	80	80	80	80	80	80	80
117	0.0725	0.0598333	0.0571667	0.06	0.0525	0.0498333	0.054	0.043	0.0411667	0.0326667	0.0218333	0.065		1	1	1	1	1	1	1	1	1	1	0	1			0.0725	0.0598333	0.0571667	0.06	0.0525	0.0498333	0.054	0.043	0.0411667	0.0326667	0	0.065			81	81	81	81	81	81	81	81
118.5	0.0735	0.0608333	0.0571667	0.062	0.0535	0.0518333	0.054	0.044	0.0431667	0.0316667	0.0228333	0.067		1	1	1	1	1	1	1	1	1	1	0	1			0.0735	0.0608333	0.0571667	0.062	0.0535	0.0518333	0.054	0.044	0.0431667	0.0316667	0	0.067			82	82	82	82	82	82	82	82
120	0.0745	0.0608333	0.0581667	0.062	0.0545	0.0538333	0.056	0.044	0.0431667	0.0326667	0.0228333	0.068		1	1	1	1	1	1	1	1	1	1	0	1			0.0745	0.0608333	0.0581667	0.062	0.0545	0.0538333	0.056	0.044	0.0431667	0.0326667	0	0.068			83	83	83	83	83	83	83	83
121.5	0.0765	0.0618333	0.0591667	0.064	0.0565	0.0548333	0.057	0.044	0.0451667	0.0336667	0.0238333	0.07		1	1	1	1	1	1	1	1	1	1	0	1			0.0765	0.0618333	0.0591667	0.064	0.0565	0.0548333	0.057	0.044	0.0451667	0.0336667	0	0.07			84	84	84	84	84	84	84	84
123	0.0795	0.0658333	0.0631667	0.068	0.0605	0.0578333	0.06	0.048	0.0471667	0.0366667	0.0258333	0.073		1	1	1	1	1	1	1	1	1	1	1	1			0.0795	0.0658333	0.0631667	0.068	0.0605	0.0578333	0.06	0.048	0.0471667	0.0366667	0.0258333	0.073			85	85	85	85	85	85	85	85
124.5	0.0795	0.0658333	0.0631667	0.069	0.0575	0.0578333	0.06	0.048	0.0461667	0.0356667	0.0248333	0.072		1	1	1	1	1	1	1	1	1	1	0	1			0.0795	0.0658333	0.0631667	0.069	0.0575	0.0578333	0.06	0.048	0.0461667	0.0356667	0	0.072			86	86	86	86	86	86	86	86
126	0.0805	0.0668333	0.0641667	0.068	0.0605	0.0588333	0.059	0.049	0.0471667	0.0366667	0.0258333	0.074		1	1	1	1	1	1	1	1	1	1	1	1			0.0805	0.0668333	0.0641667	0.068	0.0605	0.0588333	0.059	0.049	0.0471667	0.0366667	0.0258333	0.074			87	87	87	87	87	87	87	87
127.5	0.0825	0.0678333	0.0671667	0.071	0.0635	0.0608333	0.063	0.05	0.0491667	0.0376667	0.0268333	0.075		1	1	1	1	1	1	1	1	1	1	1	1			0.0825	0.0678333	0.0671667	0.071	0.0635	0.0608333	0.063	0.05	0.0491667	0.0376667	0.0268333	0.075			88	88	88	88	88	88	88	88
129	0.0835	0.0718333	0.0661667	0.072	0.0635	0.0608333	0.063	0.051	0.0491667	0.0376667	0.0268333	0.076		1	1	1	1	1	1	1	1	1	1	1	1			0.0835	0.0718333	0.0661667	0.072	0.0635	0.0608333	0.063	0.051	0.0491667	0.0376667	0.0268333	0.076			89	89	89	89	89	89	89	89
130.5	0.0855	0.0718333	0.0671667	0.075	0.0655	0.0628333	0.065	0.052	0.0521667	0.0386667	0.0278333	0.08		1	1	1	1	1	1	1	1	1	1	1	1			0.0855	0.0718333	0.0671667	0.075	0.0655	0.0628333	0.065	0.052	0.0521667	0.0386667	0.0278333	0.08			90	90	90	90	90	90	90	90
132	0.0855	0.0738333	0.0691667	0.073	0.0665	0.0618333	0.067	0.052	0.0521667	0.0376667	0.0278333	0.081		1	1	1	1	1	1	1	1	1	1	1	1			0.0855	0.0738333	0.0691667	0.073	0.0665	0.0618333	0.067	0.052	0.0521667	0.0376667	0.0278333	0.081			91	91	91	91	91	91	91	91
133.5	0.0885	0.0758333	0.0701667	0.077	0.0685	0.0638333	0.068	0.054	0.0531667	0.0396667	0.0288333	0.083		1	1	1	1	1	1	1	1	1	1	1	1			0.0885	0.0758333	0.0701667	0.077	0.0685	0.0638333	0.068	0.054	0.0531667	0.0396667	0.0288333	0.083			92	92	92	92	92	92	92	92
135	0.0875	0.0768333	0.0721667	0.077	0.0685	0.0658333	0.067	0.054	0.0521667	0.0396667	0.0288333	0.084		1	1	1	1	1	1	1	1	1	1	1	1			0.0875	0.0768333	0.0721667	0.077	0.0685	0.0658333	0.067	0.054	0.0521667	0.0396667	0.0288333	0.084			93	93	93	93	93	93	93	93
136.5	0.0895	0.0768333	0.0731667	0.079	0.0695	0.0668333	0.07	0.056	0.0541667	0.0416667	0.0298333	0.087		1	1	1	1	1	1	1	1	1	1	1	1			0.0895	0.0768333	0.0731667	0.079	0.0695	0.0668333	0.07	0.056	0.0541667	0.0416667	0.0298333	0.087			94	94	94	94	94	94	94	94
138	0.0925	0.0798333	0.0751667	0.08	0.0705	0.0668333	0.071	0.056	0.0541667	0.0426667	0.0298333	0.087		1	1	1	1	1	1	1	1	1	1	1	1			0.0925	0.0798333	0.0751667	0.08	0.0705	0.0668333	0.071	0.056	0.0541667	0.0426667	0.0298333	0.087			95	95	95	95	95	95	95	95
139.5	0.0925	0.0808333	0.0771667	0.082	0.0725	0.0688333	0.071	0.057	0.0551667	0.0436667	0.0298333	0.088		1	1	1	1	1	1	1	1	1	1	1	1			0.0925	0.0808333	0.0771667	0.082	0.0725	0.0688333	0.071	0.057	0.0551667	0.0436667	0.0298333	0.088			96	96	96	96	96	96	96	96
141	0.0945	0.0818333	0.0781667	0.083	0.0735	0.0698333	0.072	0.057	0.0561667	0.0436667	0.0308333	0.089		1	1	1	1	1	1	1	1	1	1	1	1			0.0945	0.0818333	0.0781667	0.083	0.0735	0.0698333	0.072	0.057	0.0561667	0.0436667	0.0308333	0.089			97	97	97	97	97	97	97	97
142.5	0.0965	0.0838333	0.0811667	0.086	0.0775	0.0738333	0.075	0.061	0.0591667	0.0476667	0.0348333	0.092		1	1	1	1	1	1	1	1	1	1	1	1			0.0965	0.0838333	0.0811667	0.086	0.0775	0.0738333	0.075	0.061	0.0591667	0.0476667	0.0348333	0.092			98	98	98	98	98	98	98	98
144	0.0975	0.0858333	0.0811667	0.088	0.0765	0.0738333	0.077	0.061	0.0591667	0.0456667	0.0338333	0.094		1	1	1	1	1	1	1	1	1	1	1	1			0.0975	0.0858333	0.0811667	0.088	0.0765	0.0738333	0.077	0.061	0.0591667	0.0456667	0.0338333	0.094			99	99	99	99	99	99	99	99
145.5	0.1005	0.0848333	0.0831667	0.088	0.0785	0.0748333	0.078	0.061	0.0601667	0.0466667	0.0328333	0.095		1	1	1	1	1	1	1	1	1	1	1	1			0.1005	0.0848333	0.0831667	0.088	0.0785	0.0748333	0.078	0.061	0.0601667	0.0466667	0.0328333	0.095			100	100	100	100	100	100	100	100
147	0.1005	0.0858333	0.0831667	0.087	0.0785	0.0748333	0.077	0.062	0.0611667	0.0476667	0.0338333	0.096		1	1	1	1	1	1	1	1	1	1	1	1			0.1005	0.0858333	0.0831667	0.087	0.0785	0.0748333	0.077	0.062	0.0611667	0.0476667	0.0338333	0.096			101	101	101	101	101	101	101	101
148.5	0.1015	0.0898333	0.0851667	0.09	0.0805	0.0768333	0.078	0.063	0.0611667	0.0466667	0.0348333	0.099		1	1	1	1	1	1	1	1	1	1	1	1			0.1015	0.0898333	0.0851667	0.09	0.0805	0.0768333	0.078	0.063	0.0611667	0.0466667	0.0348333	0.099			102	102	102	102	102	102	102	102
150	0.1025	0.0898333	0.0871667	0.09	0.0825	0.0778333	0.079	0.063	0.0611667	0.0476667	0.0338333	0.099		1	1	1	1	1	1	1	1	1	1	1	1			0.1025	0.0898333	0.0871667	0.09	0.0825	0.0778333	0.079	0.063	0.0611667	0.0476667	0.0338333	0.099			103	103	103	103	103	103	103	103
151.5	0.1045	0.0908333	0.0881667	0.091	0.0835	0.0778333	0.081	0.066	0.0631667	0.0486667	0.0348333	0.099		1	1	1	1	1	1	1	1	1	1	1	1			0.1045	0.0908333	0.0881667	0.091	0.0835	0.0778333	0.081	0.066	0.0631667	0.0486667	0.0348333	0.099			104	104	104	104	104	104	104	104
153	0.1065	0.0928333	0.0901667	0.093	0.0865	0.0798333	0.082	0.068	0.0651667	0.0506667	0.0368333	0.106		1	1	1	1	1	1	1	1	1	1	1	1			0.1065	0.0928333	0.0901667	0.093	0.0865	0.0798333	0.082	0.068	0.0651667	0.0506667	0.0368333	0.106			105	105	105	105	105	105	105	105
154.5	0.1065	0.0928333	0.0911667	0.094	0.0845	0.0808333	0.083	0.067	0.0641667	0.0496667	0.0368333	0.104		1	1	1	1	1	1	1	1	1	1	1	1			0.1065	0.0928333	0.0911667	0.094	0.0845	0.0808333	0.083	0.067	0.0641667	0.0496667	0.0368333	0.104			106	106	106	106	106	106	106	106
156	0.1085	0.0958333	0.0911667	0.097	0.0875	0.0818333	0.085	0.067	0.0671667	0.0516667	0.0388333	0.106		1	1	1	1	1	1	1	1	1	1	1	1			0.1085	0.0958333	0.0911667	0.097	0.0875	0.0818333	0.085	0.067	0.0671667	0.0516667	0.0388333	0.106			107	107	107	107	107	107	107	107
157.5	0.1075	0.0968333	0.0911667	0.097	0.0875	0.0828333	0.085	0.066	0.0651667	0.0506667	0.0368333	0.105		1	1	1	1	1	1	1	1	1	1	1	1			0.1075	0.0968333	0.0911667	0.097	0.0875	0.0828333	0.085	0.066	0.0651667	0.0506667	0.0368333	0.105			108	108	108	108	108	108	108	108
159	0.1105	0.0978333	0.0941667	0.098	0.0885	0.0858333	0.086	0.071	0.0681667	0.0546667	0.0388333	0.108		1	1	1	1	1	1	1	1	1	1	1	1			0.1105	0.0978333	0.0941667	0.098	0.0885	0.0858333	0.086	0.071	0.0681667	0.0546667	0.0388333	0.108			109	109	109	109	109	109	109	109
160.5	0.1105	0.0988333	0.0931667	0.1	0.0905	0.0848333	0.087	0.071	0.0671667	0.0536667	0.0378333	0.11		1	1	1	1	1	1	1	1	1	1	1	1			0.1105	0.0988333	0.0931667	0.1	0.0905	0.0848333	0.087	0.071	0.0671667	0.0536667	0.0378333	0.11			110	110	110	110	110	110	110	110
162	0.1135	0.0998333	0.0961667	0.099	0.0915	0.0878333	0.089	0.072	0.0711667	0.0546667	0.0398333	0.112		1	1	1	1	1	1	1	1	1	1	1	1			0.1135	0.0998333	0.0961667	0.099	0.0915	0.0878333	0.089	0.072	0.0711667	0.0546667	0.0398333	0.112			111	111	111	111	111	111	111	111
163.5	0.1155	0.101833	0.0981667	0.104	0.0935	0.0888333	0.09	0.075	0.0711667	0.0566667	0.0418333	0.113		1	1	1	1	1	1	1	1	1	1	1	1			0.1155	0.101833	0.0981667	0.104	0.0935	0.0888333	0.09	0.075	0.0711667	0.0566667	0.0418333	0.113			112	112	112	112	112	112	112	112
165	0.1185	0.104833	0.100167	0.106	0.0975	0.0918333	0.093	0.077	0.0731667	0.0576667	0.0428333	0.118		1	1	1	1	1	1	1	1	1	1	1	1			0.1185	0.104833	0.100167	0.106	0.0975	0.0918333	0.093	0.077	0.0731667	0.0576667	0.0428333	0.118			113	113	113	113	113	113	113	113
166.5	0.1155	0.104833	0.101167	0.105	0.0965	0.0898333	0.094	0.074	0.0731667	0.0566667	0.0428333	0.117		1	1	1	1	1	1	1	1	1	1	1	1			0.1155	0.104833	0.101167	0.105	0.0965	0.0898333	0.094	0.074	0.0731667	0.0566667	0.0428333	0.117			114	114	114	114	114	114	114	114
168	0.1175	0.106833	0.101167	0.107	0.0965	0.0908333	0.094	0.075	0.0721667	0.0586667	0.0428333	0.117		1	1	1	1	1	1	1	1	1	1	1	1			0.1175	0.106833	0.101167	0.107	0.0965	0.0908333	0.094	0.075	0.0721667	0.0586667	0.0428333	0.117			115	115	115	115	115	115	115	115
169.5	0.1215	0.105833	0.102167	0.107	0.0985	0.0908333	0.094	0.076	0.0731667	0.0576667	0.0428333	0.118		1	1	1	1	1	1	1	1	1	1	1	1			0.1215	0.105833	0.102167	0.107	0.0985	0.0908333	0.094	0.076	0.0731667	0.0576667	0.0428333	0.118			116	116	116	116	116	116	116	116
171	0.1215	0.108833	0.105167	0.11	0.0985	0.0938333	0.096	0.078	0.0751667	0.0596667	0.0438333	0.12		1	1	1	1	1	1	1	1	1	1	1	1			0.1215	0.108833	0.105167	0.11	0.0985	0.0938333	0.096	0.078	0.0751667	0.0596667	0.0438333	0.12			117	117	117	117	117	117	117	117
172.5	0.1215	0.107833	0.106167	0.11	0.1005	0.0948333	0.098	0.081	0.0761667	0.0596667	0.0448333	0.122		1	1	1	1	1	1	1	1	1	1	1	1			0.1215	0.107833	0.106167	0.11	0.1005	0.0948333	0.098	0.081	0.0761667	0.0596667	0.0448333	0.122			118	118	118	118	118	118	118	118
174	0.1245	0.110833	0.107167	0.112	0.1015	0.0958333	0.098	0.078	0.0761667	0.0626667	0.0458333	0.122		1	1	1	1	1	1	1	1	1	1	1	1			0.1245	0.110833	0.107167	0.112	0.1015	0.0958333	0.098	0.078	0.0761667	0.0626667	0.0458333	0.122			119	119	119	119	119	119	119	119
175.5	0.1245	0.110833	0.107167	0.111	0.1025	0.0968333	0.098	0.079	0.0771667	0.0626667	0.0448333	0.124		1	1	1	1	1	1	1	1	1	1	1	1			0.1245	0.110833	0.107167	0.111	0.1025	0.0968333	0.098	0.079	0.0771667	0.0626667	0.0448333	0.124			120	120	120	120	120	120	120	120
177	0.1235	0.113833	0.109167	0.115	0.1025	0.0978333	0.1	0.082	0.0781667	0.0626667	0.0468333	0.125		1	1	1	1	1	1	1	1	1	1	1	1			0.1235	0.113833	0.109167	0.115	0.1025	0.0978333	0.1	0.082	0.0781667	0.0626667	0.0468333	0.125			121	121	121	121	121	121	121	121
178.5	0.1255	0.112833	0.109167	0.115	0.1025	0.0968333	0.1	0.082	0.0781667	0.0626667	0.0448333	0.125		1	1	1	1	1	1	1	1	1	1	1	1			0.1255	0.112833	0.109167	0.115	0.1025	0.0968333	0.1	0.082	0.0781667	0.0626667	0.0448333	0.125			122	122	122	122	122	122	122	122
180	0.1245	0.112833	0.109167	0.115	0.1025	0.0998333	0.1	0.081	0.0801667	0.0636667	0.0468333	0.129		1	1	1	1	1	1	1	1	1	1	1	1			0.1245	0.112833	0.109167	0.115	0.1025	0.0998333	0.1	0.081	0.0801667	0.0636667	0.0468333	0.129			123	123	123	123	123	123	123	123
181.5	0.1285	0.114833	0.111167	0.117	0.1065	0.100833	0.103	0.082	0.0801667	0.0646667	0.0468333	0.127		1	1	1	1	1	1	1	1	1	1	1	1			0.1285	0.114833	0.111167	0.117	0.1065	0.100833	0.103	0.082	0.0801667	0.0646667	0.0468333	0.127			124	124	124	124	124	124	124	124
183	0.1315	0.117833	0.113167	0.121	0.1085	0.102833	0.107	0.085	0.0831667	0.0656667	0.0488333	0.131		1	1	1	1	1	1	1	1	1	1	1	1			0.1315	0.117833	0.113167	0.121	0.1085	0.102833	0.107	0.085	0.0831667	0.0656667	0.0488333	0.131			125	125	125	125	125	125	125	125
184.5	0.1325	0.117833	0.114167	0.12	0.1105	0.103833	0.107	0.084	0.0831667	0.0676667	0.0478333	0.132		1	1	1	1	1	1	1	1	1	1	1	1			0.1325	0.117833	0.114167	0.12	0.1105	0.103833	0.107	0.084	0.0831667	0.0676667	0.0478333	0.132			126	126	126	126	126	126	126	126
186	0.1315	0.120833	0.117167	0.12	0.1105	0.105833	0.107	0.085	0.0831667	0.0666667	0.0488333	0.132		1	1	1	1	1	1	1	1	1	1	1	1			0.1315	0.120833	0.117167	0.12	0.1105	0.105833	0.107	0.085	0.0831667	0.0666667	0.0488333	0.132			127	127	127	127	127	127	127	127
187.5	0.1335	0.123833	0.118167	0.123	0.1095	0.104833	0.107	0.088	0.0871667	0.0686667	0.0498333	0.134		1	1	1	1	1	1	1	1	1	1	1	1			0.1335	0.123833	0.118167	0.123	0.1095	0.104833	0.107	0.088	0.0871667	0.0686667	0.0498333	0.134			128	128	128	128	128	128	128	128
189	0.1335	0.121833	0.118167	0.122	0.1105	0.105833	0.107	0.088	0.0851667	0.0676667	0.0518333	0.137		1	1	1	1	1	1	1	1	1	1	1	1			0.1335	0.121833	0.118167	0.122	0.1105	0.105833	0.107	0.088	0.0851667	0.0676667	0.0518333	0.137			129	129	129	129	129	129	129	129
190.5	0.1325	0.122833	0.120167	0.125	0.1125	0.106833	0.107	0.087	0.0861667	0.0676667	0.0508333	0.136		1	1	1	1	1	1	1	1	1	1	1	1			0.1325	0.122833	0.120167	0.125	0.1125	0.106833	0.107	0.087	0.0861667	0.0676667	0.0508333	0.136			130	130	130	130	130	130	130	130
192	0.1365	0.123833	0.119167	0.125	0.1135	0.105833	0.108	0.088	0.0871667	0.0686667	0.0528333	0.138		1	1	1	1	1	1	1	1	1	1	1	1			0.1365	0.123833	0.119167	0.125	0.1135	0.105833	0.108	0.088	0.0871667	0.0686667	0.0528333	0.138			131	131	131	131	131	131	131	131
193.5	0.1385	0.126833	0.120167	0.127	0.1135	0.108833	0.111	0.089	0.0871667	0.0696667	0.0528333	0.14		1	1	1	1	1	1	1	1	1	1	1	1			0.1385	0.126833	0.120167	0.127	0.1135	0.108833	0.111	0.089	0.0871667	0.0696667	0.0528333	0.14			132	132	132	132	132	132	132	132
195	0.1365	0.126833	0.121167	0.125	0.1155	0.107833	0.111	0.089	0.0881667	0.0696667	0.0528333	0.141		1	1	1	1	1	1	1	1	1	1	1	1			0.1365	0.126833	0.121167	0.125	0.1155	0.107833	0.111	0.089	0.0881667	0.0696667	0.0528333	0.141			133	133	133	133	133	133	133	133
196.5	0.1375	0.128833	0.122167	0.126	0.1155	0.108833	0.113	0.091	0.0891667	0.0706667	0.0528333	0.141		1	1	1	1	1	1	1	1	1	1	1	1			0.1375	0.128833	0.122167	0.126	0.1155	0.108833	0.113	0.091	0.0891667	0.0706667	0.0528333	0.141			134	134	134	134	134	134	134	134
198	0.1365	0.129833	0.122167	0.127	0.1175	0.111833	0.113	0.092	0.0911667	0.0726667	0.0528333	0.141		1	1	1	1	1	1	1	1	1	1	1	1			0.1365	0.129833	0.122167	0.127	0.1175	0.111833	0.113	0.092	0.0911667	0.0726667	0.0528333	0.141			135	135	135	135	135	135	135	135
199.5	0.1405	0.130833	0.124167	0.129	0.1155	0.108833	0.115	0.092	0.0901667	0.0736667	0.0538333	0.142		1	1	1	1	1	1	1	1	1	1	1	1			0.1405	0.130833	0.124167	0.129	0.1155	0.108833	0.115	0.092	0.0901667	0.0736667	0.0538333	0.142			136	136	136	136	136	136	136	136
201	0.1415	0.131833	0.125167	0.129	0.1175	0.111833	0.113	0.092	0.0921667	0.0736667	0.0548333	0.143		1	1	1	1	1	1	1	1	1	1	1	1			0.1415	0.131833	0.125167	0.129	0.1175	0.111833	0.113	0.092	0.0921667	0.0736667	0.0548333	0.143			137	137	137	137	137	137	137	137
202.5	0.1415	0.129833	0.122167	0.132	0.1185	0.112833	0.115	0.093	0.0911667	0.0726667	0.0548333	0.145		1	1	1	1	1	1	1	1	1	1	1	1			0.1415	0.129833	0.122167	0.132	0.1185	0.112833	0.115	0.093	0.0911667	0.0726667	0.0548333	0.145			138	138	138	138	138	138	138	138
204	0.1425	0.133833	0.126167	0.129	0.1205	0.111833	0.117	0.094	0.0911667	0.0736667	0.0548333	0.147		1	1	1	1	1	1	1	1	1	1	1	1			0.1425	0.133833	0.126167	0.129	0.1205	0.111833	0.117	0.094	0.0911667	0.0736667	0.0548333	0.147			139	139	139	139	139	139	139	139
205.5	0.1435	0.132833	0.129167	0.13	0.1215	0.114833	0.119	0.095	0.0921667	0.0736667	0.0558333	0.148		1	1	1	1	1	1	1	1	1	1	1	1			0.1435	0.132833	0.129167	0.13	0.1215	0.114833	0.119	0.095	0.0921667	0.0736667	0.0558333	0.148			140	140	140	140	140	140	140	140
207	0.1445	0.133833	0.127167	0.135	0.1215	0.116833	0.119	0.097	0.0941667	0.0776667	0.0578333	0.151		1	1	1	1	1	1	1	1	1	1	1	1			0.1445	0.133833	0.127167	0.135	0.1215	0.116833	0.119	0.097	0.0941667	0.0776667	0.0578333	0.151			141	141	141	141	141	141	141	141
208.5	0.1455	0.134833	0.130167	0.135	0.1215	0.114833	0.12	0.098	0.0971667	0.0746667	0.0578333	0.15		1	1	1	1	1	1	1	1	1	1	1	1			0.1455	0.134833	0.130167	0.135	0.1215	0.114833	0.12	0.098	0.0971667	0.0746667	0.0578333	0.15			142	142	142	142	142	142	142	142
210	0.1495	0.138833	0.130167	0.135	0.1245	0.116833	0.121	0.099	0.0951667	0.0756667	0.0578333	0.152		1	1	1	1	1	1	1	1	1	1	1	1			0.1495	0.138833	0.130167	0.135	0.1245	0.116833	0.121	0.099	0.0951667	0.0756667	0.0578333	0.152			143	143	143	143	143	143	143	143
211.5	0.1445	0.135833	0.130167	0.134	0.1255	0.118833	0.12	0.096	0.0961667	0.0756667	0.0588333	0.154		1	1	1	1	1	1	1	1	1	1	1	1			0.1445	0.135833	0.130167	0.134	0.1255	0.118833	0.12	0.096	0.0961667	0.0756667	0.0588333	0.154			144	144	144	144	144	144	144	144
213	0.1445	0.136833	0.132167	0.14	0.1235	0.116833	0.121	0.098	0.0951667	0.0776667	0.0578333	0.155		1	1	1	1	1	1	1	1	1	1	1	1			0.1445	0.136833	0.132167	0.14	0.1235	0.116833	0.121	0.098	0.0951667	0.0776667	0.0578333	0.155			145	145	145	145	145	145	145	145
214.5	0.1475	0.137833	0.131167	0.14	0.1235	0.119833	0.123	0.1	0.0981667	0.0806667	0.0608333	0.158		1	1	1	1	1	1	1	1	1	1	1	1			0.1475	0.137833	0.131167	0.14	0.1235	0.119833	0.123	0.1	0.0981667	0.0806667	0.0608333	0.158			146	146	146	146	146	146	146	146
216	0.1485	0.139833	0.135167	0.144	0.1275	0.122833	0.123	0.099	0.0981667	0.0806667	0.0618333	0.159		1	1	1	1	1	1	1	1	1	1	1	1			0.1485	0.139833	0.135167	0.144	0.1275	0.122833	0.123	0.099	0.0981667	0.0806667	0.0618333	0.159			147	147	147	147	147	147	147	147
217.5	0.1485	0.138833	0.135167	0.142	0.1265	0.119833	0.125	0.1	0.0991667	0.0806667	0.0598333	0.159		1	1	1	1	1	1	1	1	1	1	1	1			0.1485	0.138833	0.135167	0.142	0.1265	0.119833	0.125	0.1	0.0991667	0.0806667	0.0598333	0.159			148	148	148	148	148	148	148	148
219	0.1505	0.141833	0.135167	0.141	0.1275	0.119833	0.125	0.101	0.101167	0.0806667	0.0608333	0.158		1	1	1	1	1	1	1	1	1	1	1	1			0.1505	0.141833	0.135167	0.141	0.1275	0.119833	0.125	0.101	0.101167	0.0806667	0.0608333	0.158			149	149	149	149	149	149	149	149
220.5	0.1505	0.143833	0.134167	0.143	0.1275	0.120833	0.125	0.101	0.100167	0.0796667	0.0618333	0.158		1	1	1	1	1	1	1	1	1	1	1	1			0.1505	0.143833	0.134167	0.143	0.1275	0.120833	0.125	0.101	0.100167	0.0796667	0.0618333	0.158			150	150	150	150	150	150	150	150
222	0.1545	0.139833	0.137167	0.142	0.1245	0.122833	0.124	0.102	0.101167	0.0826667	0.0618333	0.16		1	1	1	1	1	1	1	1	1	1	1	1			0.1545	0.139833	0.137167	0.142	0.1245	0.122833	0.124	0.102	0.101167	0.0826667	0.0618333	0.16			151	151	151	151	151	151	151	151
223.5	0.1535	0.142833	0.136167	0.144	0.1285	0.125833	0.125	0.104	0.100167	0.0826667	0.0618333	0.162		1	1	1	1	1	1	1	1	1	1	1	1			0.1535	0.142833	0.136167	0.144	0.1285	0.125833	0.125	0.104	0.100167	0.0826667	0.0618333	0.162			152	152	152	152	152	152	152	152
225	0.1525	0.142833	0.136167	0.145	0.1315	0.123833	0.128	0.104	0.103167	0.0816667	0.0628333	0.163		1	1	1	1	1	1	1	1	1	1	1	1			0.1525	0.142833	0.136167	0.145	0.1315	0.123833	0.128	0.104	0.103167	0.0816667	0.0628333	0.163			153	153	153	153	153	153	153	153
226.5	0.1545	0.138833	0.139167	0.142	0.1335	0.122833	0.127	0.104	0.103167	0.0826667	0.0628333	0.164		1	1	1	1	1	1	1	1	1	1	1	1			0.1545	0.138833	0.139167	0.142	0.1335	0.122833	0.127	0.104	0.103167	0.0826667	0.0628333	0.164			154	154	154	154	154	154	154	154
228	0.1535	0.141833	0.140167	0.147	0.1295	0.125833	0.127	0.105	0.100167	0.0836667	0.0628333	0.164		1	1	1	1	1	1	1	1	1	1	1	1			0.1535	0.141833	0.140167	0.147	0.1295	0.125833	0.127	0.105	0.100167	0.0836667	0.0628333	0.164			155	155	155	155	155	155	155	155
229.5	0.1565	0.146833	0.140167	0.146	0.1345	0.125833	0.131	0.106	0.102167	0.0836667	0.0638333	0.166		1	1	1	1	1	1	1	1	1	1	1	1			0.1565	0.146833	0.140167	0.146	0.1345	0.125833	0.131	0.106	0.102167	0.0836667	0.0638333	0.166			156	156	156	156	156	156	156	156
231	0.1595	0.146833	0.138167	0.145	0.1315	0.127833	0.131	0.106	0.105167	0.0856667	0.0658333	0.166		1	1	1	1	1	1	1	1	1	1	1	1			0.1595	0.146833	0.138167	0.145	0.1315	0.127833	0.131	0.106	0.105167	0.0856667	0.0658333	0.166			157	157	157	157	157	157	157	157
232.5	0.1565	0.148833	0.143167	0.148	0.1345	0.124833	0.129	0.105	0.105167	0.0826667	0.0658333	0.168		1	1	1	1	1	1	1	1	1	1	1	1			0.1565	0.148833	0.143167	0.148	0.1345	0.124833	0.129	0.105	0.105167	0.0826667	0.0658333	0.168			158	158	158	158	158	158	158	158
234	0.1585	0.146833	0.143167	0.152	0.1345	0.128833	0.131	0.105	0.105167	0.0866667	0.0658333	0.169		1	1	1	1	1	1	1	1	1	1	1	1			0.1585	0.146833	0.143167	0.152	0.1345	0.128833	0.131	0.105	0.105167	0.0866667	0.0658333	0.169			159	159	159	159	159	159	159	159
235.5	0.1575	0.150833	0.144167	0.15	0.1375	0.131833	0.132	0.107	0.105167	0.0866667	0.0668333	0.169		1	1	1	1	1	1	1	1	1	1	1	1			0.1575	0.150833	0.144167	0.15	0.1375	0.131833	0.132	0.107	0.105167	0.0866667	0.0668333	0.169			160	160	160	160	160	160	160	160
237	0.1595	0.149833	0.145167	0.146	0.1345	0.127833	0.134	0.107	0.105167	0.0876667	0.0668333	0.17		1	1	1	1	1	1	1	1	1	1	1	1			0.1595	0.149833	0.145167	0.146	0.1345	0.127833	0.134	0.107	0.105167	0.0876667	0.0668333	0.17			161	161	161	161	161	161	161	161
238.5	0.1585	0.151833	0.143167	0.145	0.1355	0.129833	0.135	0.109	0.108167	0.0886667	0.0648333	0.169		1	1	1	1	1	1	1	1	1	1	1	1			0.1585	0.151833	0.143167	0.145	0.1355	0.129833	0.135	0.109	0.108167	0.0886667	0.0648333	0.169			162	162	162	162	162	162	162	162
240	0.1595	0.148833	0.146167	0.15	0.1355	0.131833	0.135	0.11	0.109167	0.0866667	0.0658333	0.17		1	1	1	1	1	1	1	1	1	1	1	1			0.1595	0.148833	0.146167	0.15	0.1355	0.131833	0.135	0.11	0.109167	0.0866667	0.0658333	0.17			163	163	163	163	163	163	163	163
241.5	0.1615	0.153833	0.149167	0.149	0.1395	0.132833	0.138	0.109	0.109167	0.0896667	0.0678333	0.171		1	1	1	1	1	1	1	1	1	1	1	1			0.1615	0.153833	0.149167	0.149	0.1395	0.132833	0.138	0.109	0.109167	0.0896667	0.0678333	0.171			164	164	164	164	164	164	164	164
243	0.1635	0.154833	0.147167	0.153	0.1375	0.132833	0.138	0.111	0.110167	0.0886667	0.0678333	0.173		1	1	1	1	1	1	1	1	1	1	1	1			0.1635	0.154833	0.147167	0.153	0.1375	0.132833	0.138	0.111	0.110167	0.0886667	0.0678333	0.173			165	165	165	165	165	165	165	165
244.5	0.1615	0.151833	0.146167	0.152	0.1405	0.131833	0.136	0.111	0.109167	0.0896667	0.0678333	0.172		1	1	1	1	1	1	1	1	1	1	1	1			0.1615	0.151833	0.146167	0.152	0.1405	0.131833	0.136	0.111	0.109167	0.0896667	0.0678333	0.172			166	166	166	166	166	166	166	166
246	0.1635	0.154833	0.147167	0.157	0.1395	0.134833	0.137	0.114	0.109167	0.0896667	0.0678333	0.172		1	1	1	1	1	1	1	1	1	1	1	1			0.1635	0.154833	0.147167	0.157	0.1395	0.134833	0.137	0.114	0.109167	0.0896667	0.0678333	0.172			167	167	167	167	167	167	167	167
247.5	0.1655	0.156833	0.149167	0.153	0.1425	0.133833	0.136	0.112	0.109167	0.0866667	0.0698333	0.175		1	1	1	1	1	1	1	1	1	1	1	1			0.1655	0.156833	0.149167	0.153	0.1425	0.133833	0.136	0.112	0.109167	0.0866667	0.0698333	0.175			168	168	168	168	168	168	168	168
249	0.1645	0.156833	0.148167	0.151	0.1395	0.133833	0.136	0.111	0.108167	0.0916667	0.0698333	0.172		1	1	1	1	1	1	1	1	1	1	1	1			0.1645	0.156833	0.148167	0.151	0.1395	0.133833	0.136	0.111	0.108167	0.0916667	0.0698333	0.172			169	169	169	169	169	169	169	169
250.5	0.1655	0.158833	0.150167	0.155	0.1445	0.136833	0.137	0.116	0.113167	0.0926667	0.0718333	0.175		1	1	1	1	1	1	1	1	1	1	1	1			0.1655	0.158833	0.150167	0.155	0.1445	0.136833	0.137	0.116	0.113167	0.0926667	0.0718333	0.175			170	170	170	170	170	170	170	170
252	0.1655	0.156833	0.153167	0.157	0.1445	0.134833	0.139	0.116	0.110167	0.0916667	0.0698333	0.175		1	1	1	1	1	1	1	1	1	1	1	1			0.1655	0.156833	0.153167	0.157	0.1445	0.134833	0.139	0.116	0.110167	0.0916667	0.0698333	0.175			171	171	171	171	171	171	171	171
253.5	0.1665	0.154833	0.151167	0.158	0.1475	0.136833	0.142	0.114	0.111167	0.0916667	0.0718333	0.179		1	1	1	1	1	1	1	1	1	1	1	1			0.1665	0.154833	0.151167	0.158	0.1475	0.136833	0.142	0.114	0.111167	0.0916667	0.0718333	0.179			172	172	172	172	172	172	172	172
255	0.1685	0.159833	0.152167	0.159	0.1455	0.136833	0.138	0.116	0.113167	0.0956667	0.0728333	0.179		1	1	1	1	1	1	1	1	1	1	1	1			0.1685	0.159833	0.152167	0.159	0.1455	0.136833	0.138	0.116	0.113167	0.0956667	0.0728333	0.179			173	173	173	173	173	173	173	173
256.5	0.1705	0.157833	0.155167	0.159	0.1465	0.138833	0.138	0.115	0.112167	0.0946667	0.0718333	0.181		1	1	1	1	1	1	1	1	1	1	1	1			0.1705	0.157833	0.155167	0.159	0.1465	0.138833	0.138	0.115	0.112167	0.0946667	0.0718333	0.181			174	174	174	174	174	174	174	174
258	0.1675	0.157833	0.154167	0.158	0.1455	0.139833	0.142	0.116	0.114167	0.0956667	0.0728333	0.181		1	1	1	1	1	1	1	1	1	1	1	1			0.1675	0.157833	0.154167	0.158	0.1455	0.139833	0.142	0.116	0.114167	0.0956667	0.0728333	0.181			175	175	175	175	175	175	175	175
259.5	0.1695	0.158833	0.153167	0.163	0.1435	0.140833	0.142	0.115	0.114167	0.0936667	0.0728333	0.18		1	1	1	1	1	1	1	1	1	1	1	1			0.1695	0.158833	0.153167	0.163	0.1435	0.140833	0.142	0.115	0.114167	0.0936667	0.0728333	0.18			176	176	176	176	176	176	176	176
261	0.1705	0.161833	0.153167	0.162	0.1485	0.140833	0.142	0.118	0.115167	0.0946667	0.0728333	0.181		1	1	1	1	1	1	1	1	1	1	1	1			0.1705	0.161833	0.153167	0.162	0.1485	0.140833	0.142	0.118	0.115167	0.0946667	0.0728333	0.181			177	177	177	177	177	177	177	177
262.5	0.1695	0.164833	0.156167	0.161	0.1465	0.142833	0.141	0.118	0.112167	0.0956667	0.0728333	0.181		1	1	1	1	1	1	1	1	1	1	1	1			0.1695	0.164833	0.156167	0.161	0.1465	0.142833	0.141	0.118	0.112167	0.0956667	0.0728333	0.181			178	178	178	178	178	178	178	178
264	0.1725	0.160833	0.156167	0.159	0.1515	0.140833	0.143	0.119	0.115167	0.0946667	0.0718333	0.18		1	1	1	1	1	1	1	1	1	1	1	1			0.1725	0.160833	0.156167	0.159	0.1515	0.140833	0.143	0.119	0.115167	0.0946667	0.0718333	0.18			179	179	179	179	179	179	179	179
265.5	0.1695	0.162833	0.154167	0.163	0.1495	0.141833	0.145	0.119	0.115167	0.0946667	0.0738333	0.183		1	1	1	1	1	1	1	1	1	1	1	1			0.1695	0.162833	0.154167	0.163	0.1495	0.141833	0.145	0.119	0.115167	0.0946667	0.0738333	0.183			180	180	180	180	180	180	180	180
267	0.1715	0.164833	0.158167	0.163	0.1515	0.144833	0.144	0.117	0.115167	0.0946667	0.0738333	0.183		1	1	1	1	1	1	1	1	1	1	1	1			0.1715	0.164833	0.158167	0.163	0.1515	0.144833	0.144	0.117	0.115167	0.0946667	0.0738333	0.183			181	181	181	181	181	181	181	181
268.5	0.1745	0.164833	0.157167	0.164	0.1495	0.141833	0.146	0.122	0.117167	0.0956667	0.0758333	0.182		1	1	1	1	1	1	1	1	1	1	1	1			0.1745	0.164833	0.157167	0.164	0.1495	0.141833	0.146	0.122	0.117167	0.0956667	0.0758333	0.182			182	182	182	182	182	182	182	182
270	0.1745	0.166833	0.158167	0.165	0.1535	0.144833	0.145	0.122	0.117167	0.0966667	0.0748333	0.183		1	1	1	1	1	1	1	1	1	1	1	1			0.1745	0.166833	0.158167	0.165	0.1535	0.144833	0.145	0.122	0.117167	0.0966667	0.0748333	0.183			183	183	183	183	183	183	183	183
[truncated: 54 more columns]
