# Supplementary material for: A native chemical chaperone in the human eye lens
Source: eLife. 2022 Jun 20;11:e76923. doi: 10.7554/eLife.76923 (PMC9246369; doi:10.7554/eLife.76923)
Supplement: Figure 6—source data 1. [file elife-76923-fig6-data1.xlsx]

## Sheet: Sheet1
	This workbook containts the numerical data for aggregation traces used to create Figure 6D.
	Numerical data are presented in the left-most set of columns on each sheet.
	The balance of each sheet extracts the empirical maximum rates and apparent lag times from the numerical data, according to parameters that can be adjusted in the formulas for the relevant columns.
	On the right-most side of each sheet are plots of select aggregation curves and tangents, used to visually inspect the empirical fits and guide parameter choice to fit the true maximum rate of aggregation.

## Sheet: no_inositol
	2021-12-17 W42Q X uM with OxD 0.2, 2mM (GSH+2GSSG), EDTA 1 mM, PIPES 10 mM pH6.7 NaCl 150 mM T = 37 C no inositol													2021-12-17 W42Q X uM with OxD 0.2, 2mM (GSH+2GSSG), EDTA 1 mM, PIPES 10 mM pH6.7 NaCl 150 mM T = 37 C no inositol														2021-12-17 W42Q X uM with OxD 0.2, 2mM (GSH+2GSSG), EDTA 1 mM, PIPES 10 mM pH6.7 NaCl 150 mM T = 37 C no inositol														2021-12-17 W42Q X uM with OxD 0.2, 2mM (GSH+2GSSG), EDTA 1 mM, PIPES 10 mM pH6.7 NaCl 150 mM T = 37 C no inositol
	20	30	40	50	65	80	95	110	125	140	155	170		20	30	40	50	65	80	95	110	125	140	155	170			20	30	40	50	65	80	95	110	125	140	155	170			20	30	40	50	65	80	95	110
0	0.000666667	0.000833333	-0.000333333	-0.000333333	-0.0015	-0.000333333	0.000666667	0.000333333	0.000666667	0.000666667	-0.001	-0.000333333		0	0	0	0	0	0	0	0	0	0	0	0			0	0	0	0	0	0	0	0	0	0	0	0			0	0	0	0	0	0	0	0
1.5	0.000666667	-0.000166667	-0.000333333	0.000666667	-0.0015	-0.000333333	-0.000333333	0.000333333	0.000666667	0.000666667	-0.001	0.000666667		0	0	0	0	0	0	0	0	0	0	0	0			0	0	0	0	0	0	0	0	0	0	0	0			0	0	0	0	0	0	0	0
3	0.000666667	-0.000166667	-0.000333333	-0.000333333	-0.0025	0.000666667	-0.000333333	0.000333333	-0.00133333	-0.000333333	-0.001	-0.000333333		0	0	0	0	0	0	0	0	0	0	0	0			0	0	0	0	0	0	0	0	0	0	0	0			0	0	0	0	0	0	0	0
4.5	0.000666667	0.000833333	-0.000333333	0.000666667	-0.0015	-0.000333333	-0.000333333	-0.000666667	-0.000333333	-0.000333333	-0.001	-0.000333333		0	0	0	0	0	0	0	0	0	0	0	0			0	0	0	0	0	0	0	0	0	0	0	0			0	0	0	0	0	0	0	0
6	0.000666667	0.000833333	-0.00133333	0.000666667	-0.0015	0.000666667	0.000666667	0.000333333	-0.000333333	0.000666667	-0.001	-0.000333333		0	0	0	0	0	0	0	0	0	0	0	0			0	0	0	0	0	0	0	0	0	0	0	0			0	0	0	0	0	0	0	0
7.5	-0.000333333	-0.000166667	-0.000333333	-0.000333333	-0.0005	0.000666667	-0.000333333	-0.000666667	-0.00133333	-0.000333333	0	-0.000333333		0	0	0	0	0	0	0	0	0	0	0	0			0	0	0	0	0	0	0	0	0	0	0	0			0	0	0	0	0	0	0	0
9	0.000666667	0.000833333	0.000666667	0.000666667	-0.0005	0.000666667	0.000666667	0.000333333	0.000666667	0.000666667	0	0.000666667		0	0	0	0	0	0	0	0	0	0	0	0			0	0	0	0	0	0	0	0	0	0	0	0			0	0	0	0	0	0	0	0
10.5	-0.000333333	-0.000166667	-0.000333333	-0.000333333	-0.0015	-0.000333333	0.000666667	0.000333333	0.000666667	-0.000333333	0	-0.000333333		0	0	0	0	0	0	0	0	0	0	0	0			0	0	0	0	0	0	0	0	0	0	0	0			0	0	0	0	0	0	0	0
12	-0.000333333	-0.000166667	-0.000333333	-0.000333333	-0.0015	-0.00133333	-0.000333333	-0.000666667	-0.000333333	-0.000333333	-0.001	-0.000333333		0	0	0	0	0	0	0	0	0	0	0	0			0	0	0	0	0	0	0	0	0	0	0	0			0	0	0	0	0	0	0	0
13.5	0.000666667	0.000833333	0.000666667	0.000666667	0.0005	0.000666667	0.000666667	0.00133333	0.000666667	0.000666667	0.001	0.000666667		0	0	0	0	0	0	0	0	0	0	0	0			0	0	0	0	0	0	0	0	0	0	0	0			0	0	0	0	0	0	0	0
15	-0.000333333	-0.00116667	-0.000333333	-0.000333333	0.0035	-0.000333333	-0.00133333	-0.000666667	-0.000333333	-0.000333333	0	-0.000333333		0	0	0	0	0	0	0	0	0	0	0	0			0	0	0	0	0	0	0	0	0	0	0	0			0	0	0	0	0	0	0	0
16.5	0.000666667	-0.000166667	0.000666667	0.000666667	0.0055	-0.000333333	0.000666667	-0.000666667	0.000666667	-0.000333333	0.001	-0.000333333		0	0	0	0	0	0	0	0	0	0	0	0			0	0	0	0	0	0	0	0	0	0	0	0			0	0	0	0	0	0	0	0
18	-0.000333333	-0.000166667	-0.000333333	-0.000333333	0.0055	-0.000333333	-0.000333333	-0.000666667	-0.000333333	0.000666667	0	-0.000333333		0	0	0	0	0	0	0	0	0	0	0	0			0	0	0	0	0	0	0	0	0	0	0	0			0	0	0	0	0	0	0	0
19.5	-0.000333333	-0.000166667	-0.000333333	0.000666667	0.0055	-0.000333333	-0.000333333	-0.000666667	-0.000333333	-0.00133333	-0.001	-0.000333333		0	0	0	0	0	0	0	0	0	0	0	0			0	0	0	0	0	0	0	0	0	0	0	0			0	0	0	0	0	0	0	0
21	-0.000333333	-0.000166667	0.000666667	-0.000333333	0.0055	-0.000333333	-0.000333333	0.000333333	0.000666667	-0.000333333	0	0.000666667		0	0	0	0	0	0	0	0	0	0	0	0			0	0	0	0	0	0	0	0	0	0	0	0			0	0	0	0	0	0	0	0
22.5	-0.000333333	-0.000166667	0.000666667	-0.000333333	0.0055	-0.000333333	-0.00133333	0.000333333	-0.000333333	-0.000333333	-0.001	0.000666667		0	0	0	0	0	0	0	0	0	0	0	0			0	0	0	0	0	0	0	0	0	0	0	0			0	0	0	0	0	0	0	0
24	-0.000333333	0.000833333	-0.000333333	0.000666667	0.0065	0.000666667	0.000666667	0.000333333	0.000666667	0.00166667	0	0.00366667		0	0	0	0	0	0	0	0	0	0	0	0			0	0	0	0	0	0	0	0	0	0	0	0			0	0	0	0	0	0	0	0
25.5	0.000666667	-0.000166667	-0.000333333	-0.000333333	0.0055	0.000666667	0.000666667	0.00133333	0.000666667	0.000666667	0.001	0.00866667		0	0	0	0	0	0	0	0	0	0	0	0			0	0	0	0	0	0	0	0	0	0	0	0			0	0	0	0	0	0	0	0
27	0.000666667	-0.000166667	-0.000333333	-0.000333333	0.0055	0.000666667	-0.000333333	0.000333333	0.000666667	0.00166667	0.003	0.0226667		0	0	0	0	0	0	0	0	0	0	0	0			0	0	0	0	0	0	0	0	0	0	0	0			0	0	0	0	0	0	0	0
28.5	0.000666667	0.000833333	-0.000333333	0.000666667	0.0055	-0.000333333	0.000666667	0.000333333	0.00166667	0.00266667	0.009	0.0506667		0	0	0	0	0	0	0	0	0	0	0	1			0	0	0	0	0	0	0	0	0	0	0	0.0506667			0	0	0	0	0	0	0	0
30	0.000666667	-0.000166667	0.000666667	-0.000333333	0.0065	0.000666667	0.000666667	0.00133333	0.00266667	0.00466667	0.017	0.0956667		0	0	0	0	0	0	0	0	0	0	0	1			0	0	0	0	0	0	0	0	0	0	0	0.0956667			0	0	0	0	0	0	0	0
31.5	-0.000333333	-0.000166667	-0.00133333	-0.000333333	0.0055	-0.000333333	-0.000333333	0.00133333	0.00166667	0.00766667	0.036	0.154667		0	0	0	0	0	0	0	0	0	0	0	1			0	0	0	0	0	0	0	0	0	0	0	0.154667			0	0	0	0	0	0	0	0
33	0.000666667	-0.000166667	-0.00133333	-0.000333333	0.0055	-0.000333333	0.000666667	0.00133333	0.00566667	0.0196667	0.068	0.225667		0	0	0	0	0	0	0	0	0	0	1	1			0	0	0	0	0	0	0	0	0	0	0.068	0.225667			0	0	0	0	0	0	0	0
34.5	0.000666667	-0.000166667	-0.000333333	0.000666667	0.0065	0.000666667	0.00166667	0.00233333	0.00966667	0.0356667	0.109	0.299667		0	0	0	0	0	0	0	0	0	0	1	1			0	0	0	0	0	0	0	0	0	0	0.109	0.299667			0	0	0	0	0	0	0	0
36	-0.000333333	-0.000166667	0.000666667	-0.000333333	0.0065	0.000666667	0.00166667	0.00433333	0.0156667	0.0616667	0.16	0.374667		0	0	0	0	0	0	0	0	0	1	1	1			0	0	0	0	0	0	0	0	0	0.0616667	0.16	0.374667			0	0	0	0	0	0	0	0
37.5	-0.000333333	-0.000166667	0.000666667	-0.00133333	0.0055	0.00166667	0.00266667	0.00533333	0.0276667	0.0936667	0.218	0.441667		0	0	0	0	0	0	0	0	0	1	1	1			0	0	0	0	0	0	0	0	0	0.0936667	0.218	0.441667			0	0	0	0	0	0	0	0
39	0.000666667	-0.000166667	0.000666667	0.000666667	0.0065	0.000666667	0.00266667	0.00733333	0.0466667	0.134667	0.28	0.498667		0	0	0	0	0	0	0	0	0	1	1	1			0	0	0	0	0	0	0	0	0	0.134667	0.28	0.498667			0	0	0	0	0	0	0	0
40.5	0.000666667	-0.000166667	-0.000333333	-0.000333333	0.0055	0.00166667	0.00366667	0.0133333	0.0726667	0.186667	0.34	0.552667		0	0	0	0	0	0	0	0	1	1	1	1			0	0	0	0	0	0	0	0	0.0726667	0.186667	0.34	0.552667			0	0	0	0	0	0	0	0
42	-0.000333333	-0.000166667	-0.000333333	0.000666667	0.0065	0.00266667	0.00566667	0.0233333	0.0986667	0.240667	0.4	0.602667		0	0	0	0	0	0	0	0	1	1	1	1			0	0	0	0	0	0	0	0	0.0986667	0.240667	0.4	0.602667			0	0	0	0	0	0	0	0
43.5	-0.000333333	-0.000166667	0.000666667	0.000666667	0.0065	0.00166667	0.00666667	0.0343333	0.128667	0.290667	0.454	0.634667		0	0	0	0	0	0	0	0	1	1	1	1			0	0	0	0	0	0	0	0	0.128667	0.290667	0.454	0.634667			0	0	0	0	0	0	0	0
45	-0.00133333	-0.00116667	-0.000333333	-0.000333333	0.0065	0.00266667	0.00966667	0.0513333	0.168667	0.337667	0.492	0.670667		0	0	0	0	0	0	0	1	1	1	1	1			0	0	0	0	0	0	0	0.0513333	0.168667	0.337667	0.492	0.670667			0	0	0	0	0	0	0	33
46.5	-0.000333333	-0.000166667	-0.000333333	0.000666667	0.0075	0.00366667	0.0156667	0.0733333	0.215667	0.388667	0.535	0.704667		0	0	0	0	0	0	0	1	1	1	1	1			0	0	0	0	0	0	0	0.0733333	0.215667	0.388667	0.535	0.704667			0	0	0	0	0	0	0	34
48	0.000666667	0.000833333	-0.000333333	0.000666667	0.0075	0.00566667	0.0236667	0.0973333	0.261667	0.435667	0.573	0.721667		0	0	0	0	0	0	0	1	1	1	1	1			0	0	0	0	0	0	0	0.0973333	0.261667	0.435667	0.573	0.721667			0	0	0	0	0	0	0	35
49.5	-0.000333333	0.000833333	0.000666667	0.000666667	0.0065	0.00566667	0.0336667	0.122333	0.305667	0.473667	0.596	0.748667		0	0	0	0	0	0	0	1	1	1	1	1			0	0	0	0	0	0	0	0.122333	0.305667	0.473667	0.596	0.748667			0	0	0	0	0	0	0	36
51	-0.000333333	-0.00116667	0.000666667	-0.000333333	0.0065	0.00766667	0.0436667	0.151333	0.348667	0.503667	0.632	0.779667		0	0	0	0	0	0	0	1	1	1	1	1			0	0	0	0	0	0	0	0.151333	0.348667	0.503667	0.632	0.779667			0	0	0	0	0	0	0	37
52.5	0.000666667	-0.000166667	0.000666667	0.000666667	0.0085	0.0106667	0.0586667	0.187333	0.384667	0.536667	0.655	0.783667		0	0	0	0	0	0	1	1	1	1	1	1			0	0	0	0	0	0	0.0586667	0.187333	0.384667	0.536667	0.655	0.783667			0	0	0	0	0	0	38	38
54	-0.000333333	-0.00116667	-0.000333333	0.000666667	0.0075	0.0126667	0.0756667	0.208333	0.414667	0.568667	0.673	0.807667		0	0	0	0	0	0	1	1	1	1	1	1			0	0	0	0	0	0	0.0756667	0.208333	0.414667	0.568667	0.673	0.807667			0	0	0	0	0	0	39	39
55.5	0.00166667	0.000833333	0.00166667	0.00166667	0.0095	0.0186667	0.0936667	0.232333	0.443667	0.604667	0.697	0.844667		0	0	0	0	0	0	1	1	1	1	1	1			0	0	0	0	0	0	0.0936667	0.232333	0.443667	0.604667	0.697	0.844667			0	0	0	0	0	0	40	40
57	0.000666667	0.000833333	0.00166667	0.00166667	0.0095	0.0236667	0.111667	0.251333	0.466667	0.625667	0.722	0.849667		0	0	0	0	0	0	1	1	1	1	1	1			0	0	0	0	0	0	0.111667	0.251333	0.466667	0.625667	0.722	0.849667			0	0	0	0	0	0	41	41
58.5	0.000666667	-0.000166667	0.00166667	0.00166667	0.0095	0.0306667	0.134667	0.281333	0.496667	0.641667	0.738	0.853667		0	0	0	0	0	0	1	1	1	1	1	1			0	0	0	0	0	0	0.134667	0.281333	0.496667	0.641667	0.738	0.853667			0	0	0	0	0	0	42	42
60	0.000666667	0.000833333	0.00166667	0.00166667	0.0115	0.0396667	0.153667	0.307333	0.520667	0.661667	0.756	0.892667		0	0	0	0	0	0	1	1	1	1	1	1			0	0	0	0	0	0	0.153667	0.307333	0.520667	0.661667	0.756	0.892667			0	0	0	0	0	0	43	43
61.5	0.000666667	0.000833333	0.000666667	0.00266667	0.0115	0.0496667	0.163667	0.328333	0.536667	0.678667	0.774	0.914667		0	0	0	0	0	0	1	1	1	1	1	1			0	0	0	0	0	0	0.163667	0.328333	0.536667	0.678667	0.774	0.914667			0	0	0	0	0	0	44	44
63	0.000666667	-0.000166667	0.000666667	0.00266667	0.0115	0.0606667	0.198667	0.345333	0.554667	0.688667	0.775	0.907667		0	0	0	0	0	0	1	1	1	1	1	1			0	0	0	0	0	0	0.198667	0.345333	0.554667	0.688667	0.775	0.907667			0	0	0	0	0	0	45	45
64.5	-0.000333333	0.000833333	0.000666667	0.00166667	0.0135	0.0716667	0.207667	0.363333	0.569667	0.719667	0.792	0.924667		0	0	0	0	0	0	1	1	1	1	1	1			0	0	0	0	0	0	0.207667	0.363333	0.569667	0.719667	0.792	0.924667			0	0	0	0	0	0	46	46
66	0.00166667	0.00183333	0.00166667	0.00366667	0.0175	0.0866667	0.231667	0.384333	0.586667	0.730667	0.813	0.955667		0	0	0	0	0	1	1	1	1	1	1	1			0	0	0	0	0	0.0866667	0.231667	0.384333	0.586667	0.730667	0.813	0.955667			0	0	0	0	0	47	47	47
67.5	0.000666667	-0.000166667	0.000666667	0.00166667	0.0185	0.0996667	0.232667	0.392333	0.603667	0.756667	0.832	0.973667		0	0	0	0	0	1	1	1	1	1	1	1			0	0	0	0	0	0.0996667	0.232667	0.392333	0.603667	0.756667	0.832	0.973667			0	0	0	0	0	48	48	48
69	0.000666667	-0.00116667	0.00166667	0.00266667	0.0205	0.114667	0.260667	0.409333	0.614667	0.750667	0.83	0.967667		0	0	0	0	0	1	1	1	1	1	1	1			0	0	0	0	0	0.114667	0.260667	0.409333	0.614667	0.750667	0.83	0.967667			0	0	0	0	0	49	49	49
70.5	-0.000333333	-0.000166667	0.000666667	0.00366667	0.0235	0.128667	0.269667	0.421333	0.637667	0.754667	0.867	0.931667		0	0	0	0	0	1	1	1	1	1	1	1			0	0	0	0	0	0.128667	0.269667	0.421333	0.637667	0.754667	0.867	0.931667			0	0	0	0	0	50	50	50
72	0.000666667	0.000833333	0.00166667	0.00366667	0.0285	0.144667	0.290667	0.436333	0.646667	0.772667	0.856	0.948667		0	0	0	0	0	1	1	1	1	1	1	1			0	0	0	0	0	0.144667	0.290667	0.436333	0.646667	0.772667	0.856	0.948667			0	0	0	0	0	51	51	51
73.5	-0.000333333	0.000833333	0.00166667	0.00366667	0.0345	0.158667	0.293667	0.451333	0.659667	0.793667	0.872	0.986667		0	0	0	0	0	1	1	1	1	1	1	1			0	0	0	0	0	0.158667	0.293667	0.451333	0.659667	0.793667	0.872	0.986667			0	0	0	0	0	52	52	52
75	0.000666667	0.000833333	0.00266667	0.00466667	0.0405	0.171667	0.301667	0.459333	0.686667	0.798667	0.888	0.989667		0	0	0	0	0	1	1	1	1	1	1	1			0	0	0	0	0	0.171667	0.301667	0.459333	0.686667	0.798667	0.888	0.989667			0	0	0	0	0	53	53	53
76.5	-0.000333333	0.000833333	0.00166667	0.00466667	0.0455	0.181667	0.310667	0.475333	0.679667	0.807667	0.886	0.997667		0	0	0	0	0	1	1	1	1	1	1	1			0	0	0	0	0	0.181667	0.310667	0.475333	0.679667	0.807667	0.886	0.997667			0	0	0	0	0	54	54	54
78	-0.000333333	0.000833333	0.00266667	0.00566667	0.0525	0.193667	0.326667	0.493333	0.676667	0.808667	0.914	1.01367		0	0	0	0	0	1	1	1	1	1	1	1			0	0	0	0	0	0.193667	0.326667	0.493333	0.676667	0.808667	0.914	1.01367			0	0	0	0	0	55	55	55
79.5	-0.000333333	-0.000166667	0.000666667	0.00366667	0.0585	0.205667	0.339667	0.493333	0.693667	0.814667	0.923	0.983667		0	0	0	0	0	1	1	1	1	1	1	1			0	0	0	0	0	0.205667	0.339667	0.493333	0.693667	0.814667	0.923	0.983667			0	0	0	0	0	56	56	56
81	-0.000333333	0.000833333	0.00166667	0.00566667	0.0675	0.224667	0.353667	0.509333	0.706667	0.833667	0.909	1.00567		0	0	0	0	0	1	1	1	1	1	1	1			0	0	0	0	0	0.224667	0.353667	0.509333	0.706667	0.833667	0.909	1.00567			0	0	0	0	0	57	57	57
82.5	0.000666667	0.000833333	0.00266667	0.00666667	0.0765	0.230667	0.363667	0.526333	0.714667	0.824667	0.887	1.01267		0	0	0	0	0	1	1	1	1	1	1	1			0	0	0	0	0	0.230667	0.363667	0.526333	0.714667	0.824667	0.887	1.01267			0	0	0	0	0	58	58	58
84	-0.000333333	0.000833333	0.00366667	0.00866667	0.0835	0.242667	0.368667	0.548333	0.731667	0.837667	0.936	1.01767		0	0	0	0	1	1	1	1	1	1	1	1			0	0	0	0	0.0835	0.242667	0.368667	0.548333	0.731667	0.837667	0.936	1.01767			0	0	0	0	59	59	59	59
85.5	0.000666667	0.000833333	0.00266667	0.00866667	0.0945	0.253667	0.375667	0.558333	0.741667	0.840667	0.932	1.04967		0	0	0	0	1	1	1	1	1	1	1	1			0	0	0	0	0.0945	0.253667	0.375667	0.558333	0.741667	0.840667	0.932	1.04967			0	0	0	0	60	60	60	60
87	0.00166667	0.000833333	0.00366667	0.0106667	0.1065	0.261667	0.384667	0.547333	0.753667	0.862667	0.932	1.05367		0	0	0	0	1	1	1	1	1	1	1	1			0	0	0	0	0.1065	0.261667	0.384667	0.547333	0.753667	0.862667	0.932	1.05367			0	0	0	0	61	61	61	61
88.5	0.000666667	-0.000166667	0.00366667	0.0106667	0.1145	0.268667	0.390667	0.565333	0.760667	0.871667	0.927	1.05567		0	0	0	0	1	1	1	1	1	1	1	1			0	0	0	0	0.1145	0.268667	0.390667	0.565333	0.760667	0.871667	0.927	1.05567			0	0	0	0	62	62	62	62
90	0.000666667	0.00183333	0.00466667	0.0126667	0.1195	0.286667	0.397667	0.566333	0.762667	0.877667	0.947	1.08067		0	0	0	0	1	1	1	1	1	1	1	1			0	0	0	0	0.1195	0.286667	0.397667	0.566333	0.762667	0.877667	0.947	1.08067			0	0	0	0	63	63	63	63
91.5	0.000666667	0.000833333	0.00366667	0.0146667	0.1275	0.293667	0.402667	0.568333	0.766667	0.868667	0.959	1.04667		0	0	0	0	1	1	1	1	1	1	1	1			0	0	0	0	0.1275	0.293667	0.402667	0.568333	0.766667	0.868667	0.959	1.04667			0	0	0	0	64	64	64	64
93	0.00166667	0.00283333	0.00466667	0.0166667	0.1365	0.302667	0.412667	0.570333	0.755667	0.874667	0.961	1.08067		0	0	0	0	1	1	1	1	1	1	1	1			0	0	0	0	0.1365	0.302667	0.412667	0.570333	0.755667	0.874667	0.961	1.08067			0	0	0	0	65	65	65	65
94.5	0.000666667	0.00183333	0.00466667	0.0176667	0.1475	0.313667	0.410667	0.587333	0.778667	0.868667	0.95	1.05267		0	0	0	0	1	1	1	1	1	1	1	1			0	0	0	0	0.1475	0.313667	0.410667	0.587333	0.778667	0.868667	0.95	1.05267			0	0	0	0	66	66	66	66
96	0.000666667	0.00183333	0.00666667	0.0206667	0.1535	0.331667	0.423667	0.589333	0.796667	0.874667	0.963	1.06467		0	0	0	0	1	1	1	1	1	1	1	1			0	0	0	0	0.1535	0.331667	0.423667	0.589333	0.796667	0.874667	0.963	1.06467			0	0	0	0	67	67	67	67
97.5	0.000666667	0.00183333	0.00566667	0.0216667	0.1625	0.343667	0.436667	0.584333	0.792667	0.876667	0.972	1.07667		0	0	0	0	1	1	1	1	1	1	1	1			0	0	0	0	0.1625	0.343667	0.436667	0.584333	0.792667	0.876667	0.972	1.07667			0	0	0	0	68	68	68	68
99	-0.000333333	0.000833333	0.00466667	0.0246667	0.1685	0.340667	0.446667	0.599333	0.778667	0.894667	0.994	1.08167		0	0	0	0	1	1	1	1	1	1	1	1			0	0	0	0	0.1685	0.340667	0.446667	0.599333	0.778667	0.894667	0.994	1.08167			0	0	0	0	69	69	69	69
100.5	0.000666667	0.00183333	0.00666667	0.0266667	0.1735	0.358667	0.453667	0.605333	0.812667	0.906667	1.013	1.10667		0	0	0	0	1	1	1	1	1	1	1	1			0	0	0	0	0.1735	0.358667	0.453667	0.605333	0.812667	0.906667	1.013	1.10667			0	0	0	0	70	70	70	70
102	0.000666667	0.00183333	0.00766667	0.0296667	0.1795	0.367667	0.447667	0.606333	0.818667	0.931667	1.007	1.11567		0	0	0	0	1	1	1	1	1	1	1	1			0	0	0	0	0.1795	0.367667	0.447667	0.606333	0.818667	0.931667	1.007	1.11567			0	0	0	0	71	71	71	71
103.5	0.000666667	0.00183333	0.00666667	0.0326667	0.1865	0.373667	0.462667	0.610333	0.815667	0.931667	1.023	1.10867		0	0	0	0	1	1	1	1	1	1	1	1			0	0	0	0	0.1865	0.373667	0.462667	0.610333	0.815667	0.931667	1.023	1.10867			0	0	0	0	72	72	72	72
105	0.000666667	0.00183333	0.00666667	0.0366667	0.1965	0.386667	0.461667	0.609333	0.824667	0.942667	1.025	1.11767		0	0	0	0	1	1	1	1	1	1	1	1			0	0	0	0	0.1965	0.386667	0.461667	0.609333	0.824667	0.942667	1.025	1.11767			0	0	0	0	73	73	73	73
106.5	0.000666667	0.00183333	0.00766667	0.0376667	0.1995	0.382667	0.465667	0.615333	0.824667	0.954667	0.998	1.12567		0	0	0	0	1	1	1	1	1	1	1	1			0	0	0	0	0.1995	0.382667	0.465667	0.615333	0.824667	0.954667	0.998	1.12567			0	0	0	0	74	74	74	74
108	-0.000333333	0.000833333	0.00866667	0.0416667	0.2045	0.388667	0.475667	0.625333	0.825667	0.948667	1.028	1.11367		0	0	0	0	1	1	1	1	1	1	1	1			0	0	0	0	0.2045	0.388667	0.475667	0.625333	0.825667	0.948667	1.028	1.11367			0	0	0	0	75	75	75	75
109.5	0.000666667	0.00183333	0.00966667	0.0466667	0.2135	0.397667	0.482667	0.618333	0.842667	0.952667	1.015	1.15467		0	0	0	0	1	1	1	1	1	1	1	1			0	0	0	0	0.2135	0.397667	0.482667	0.618333	0.842667	0.952667	1.015	1.15467			0	0	0	0	76	76	76	76
111	0.000666667	0.00283333	0.0106667	0.0496667	0.2165	0.400667	0.482667	0.633333	0.846667	0.960667	1.043	1.13667		0	0	0	0	1	1	1	1	1	1	1	1			0	0	0	0	0.2165	0.400667	0.482667	0.633333	0.846667	0.960667	1.043	1.13667			0	0	0	0	77	77	77	77
112.5	0.000666667	0.00383333	0.0116667	0.0526667	0.2185	0.407667	0.486667	0.628333	0.853667	0.949667	1.043	1.14667		0	0	0	0	1	1	1	1	1	1	1	1			0	0	0	0	0.2185	0.407667	0.486667	0.628333	0.853667	0.949667	1.043	1.14667			0	0	0	0	78	78	78	78
114	0.000666667	0.00283333	0.0126667	0.0576667	0.2265	0.410667	0.494667	0.636333	0.865667	0.954667	1.052	1.13467		0	0	0	0	1	1	1	1	1	1	1	1			0	0	0	0	0.2265	0.410667	0.494667	0.636333	0.865667	0.954667	1.052	1.13467			0	0	0	0	79	79	79	79
115.5	0.00166667	0.00283333	0.0126667	0.0616667	0.2365	0.414667	0.513667	0.658333	0.861667	0.974667	1.062	1.12167		0	0	0	0	1	1	1	1	1	1	1	1			0	0	0	0	0.2365	0.414667	0.513667	0.658333	0.861667	0.974667	1.062	1.12167			0	0	0	0	80	80	80	80
117	0.000666667	0.00183333	0.0126667	0.0636667	0.2435	0.419667	0.511667	0.657333	0.861667	0.973667	1.036	1.13167		0	0	0	0	1	1	1	1	1	1	1	1			0	0	0	0	0.2435	0.419667	0.511667	0.657333	0.861667	0.973667	1.036	1.13167			0	0	0	0	81	81	81	81
118.5	0.000666667	0.00283333	0.0146667	0.0676667	0.2465	0.421667	0.522667	0.667333	0.876667	0.979667	1.033	1.12267		0	0	0	0	1	1	1	1	1	1	1	1			0	0	0	0	0.2465	0.421667	0.522667	0.667333	0.876667	0.979667	1.033	1.12267			0	0	0	0	82	82	82	82
120	0.000666667	0.00283333	0.0156667	0.0696667	0.2525	0.418667	0.515667	0.663333	0.888667	0.995667	1.072	1.13467		0	0	0	0	1	1	1	1	1	1	1	1			0	0	0	0	0.2525	0.418667	0.515667	0.663333	0.888667	0.995667	1.072	1.13467			0	0	0	0	83	83	83	83
121.5	0.000666667	0.00383333	0.0166667	0.0736667	0.2575	0.430667	0.530667	0.672333	0.897667	0.975667	1.041	1.14367		0	0	0	0	1	1	1	1	1	1	1	1			0	0	0	0	0.2575	0.430667	0.530667	0.672333	0.897667	0.975667	1.041	1.14367			0	0	0	0	84	84	84	84
123	0.000666667	0.00383333	0.0186667	0.0776667	0.2555	0.422667	0.524667	0.684333	0.891667	1.03767	1.06	1.11867		0	0	0	0	1	1	1	1	1	1	1	1			0	0	0	0	0.2555	0.422667	0.524667	0.684333	0.891667	1.03767	1.06	1.11867			0	0	0	0	85	85	85	85
124.5	0.000666667	0.00383333	0.0186667	0.0806667	0.2635	0.429667	0.525667	0.689333	0.899667	1.01467	1.06	1.14267		0	0	0	0	1	1	1	1	1	1	1	1			0	0	0	0	0.2635	0.429667	0.525667	0.689333	0.899667	1.01467	1.06	1.14267			0	0	0	0	86	86	86	86
126	0.000666667	0.00383333	0.0196667	0.0836667	0.2755	0.437667	0.539667	0.688333	0.904667	1.01667	1.08	1.15467		0	0	0	0	1	1	1	1	1	1	1	1			0	0	0	0	0.2755	0.437667	0.539667	0.688333	0.904667	1.01667	1.08	1.15467			0	0	0	0	87	87	87	87
127.5	0.00166667	0.00483333	0.0216667	0.0876667	0.2865	0.443667	0.546667	0.681333	0.927667	1.00767	1.067	1.14967		0	0	0	0	1	1	1	1	1	1	1	1			0	0	0	0	0.2865	0.443667	0.546667	0.681333	0.927667	1.00767	1.067	1.14967			0	0	0	0	88	88	88	88
129	0.000666667	0.00383333	0.0236667	0.0916667	0.2835	0.439667	0.543667	0.689333	0.923667	1.00967	1.059	1.16367		0	0	0	0	1	1	1	1	1	1	1	1			0	0	0	0	0.2835	0.439667	0.543667	0.689333	0.923667	1.00967	1.059	1.16367			0	0	0	0	89	89	89	89
130.5	-0.000333333	0.00483333	0.0246667	0.0946667	0.2935	0.454667	0.538667	0.710333	0.929667	1.02167	1.042	1.19167		0	0	0	0	1	1	1	1	1	1	1	1			0	0	0	0	0.2935	0.454667	0.538667	0.710333	0.929667	1.02167	1.042	1.19167			0	0	0	0	90	90	90	90
132	0.000666667	0.00483333	0.0256667	0.0976667	0.3015	0.452667	0.550667	0.715333	0.939667	1.04067	1.054	1.18767		0	0	0	0	1	1	1	1	1	1	1	1			0	0	0	0	0.3015	0.452667	0.550667	0.715333	0.939667	1.04067	1.054	1.18767			0	0	0	0	91	91	91	91
133.5	0.00166667	0.00483333	0.0276667	0.100667	0.3045	0.451667	0.563667	0.686333	0.939667	1.03867	1.07	1.19267		0	0	0	1	1	1	1	1	1	1	1	1			0	0	0	0.100667	0.3045	0.451667	0.563667	0.686333	0.939667	1.03867	1.07	1.19267			0	0	0	92	92	92	92	92
135	0.00166667	0.00483333	0.0296667	0.102667	0.3035	0.463667	0.563667	0.724333	0.919667	1.01367	1.052	1.18167		0	0	0	1	1	1	1	1	1	1	1	1			0	0	0	0.102667	0.3035	0.463667	0.563667	0.724333	0.919667	1.01367	1.052	1.18167			0	0	0	93	93	93	93	93
136.5	0.000666667	0.00583333	0.0306667	0.110667	0.3115	0.466667	0.557667	0.720333	0.928667	1.01967	1.076	1.19667		0	0	0	1	1	1	1	1	1	1	1	1			0	0	0	0.110667	0.3115	0.466667	0.557667	0.720333	0.928667	1.01967	1.076	1.19667			0	0	0	94	94	94	94	94
138	0.00166667	0.00683333	0.0316667	0.115667	0.3175	0.472667	0.566667	0.718333	0.943667	1.02067	1.098	1.20767		0	0	0	1	1	1	1	1	1	1	1	1			0	0	0	0.115667	0.3175	0.472667	0.566667	0.718333	0.943667	1.02067	1.098	1.20767			0	0	0	95	95	95	95	95
139.5	0.00266667	0.00583333	0.0336667	0.116667	0.3185	0.477667	0.568667	0.732333	0.931667	1.02867	1.101	1.21167		0	0	0	1	1	1	1	1	1	1	1	1			0	0	0	0.116667	0.3185	0.477667	0.568667	0.732333	0.931667	1.02867	1.101	1.21167			0	0	0	96	96	96	96	96
141	0.00166667	0.00683333	0.0356667	0.121667	0.3215	0.484667	0.573667	0.722333	0.943667	1.02067	1.084	1.20367		0	0	0	1	1	1	1	1	1	1	1	1			0	0	0	0.121667	0.3215	0.484667	0.573667	0.722333	0.943667	1.02067	1.084	1.20367			0	0	0	97	97	97	97	97
142.5	0.00266667	0.00783333	0.0366667	0.131667	0.3255	0.479667	0.577667	0.722333	0.958667	1.04667	1.11	1.21067		0	0	0	1	1	1	1	1	1	1	1	1			0	0	0	0.131667	0.3255	0.479667	0.577667	0.722333	0.958667	1.04667	1.11	1.21067			0	0	0	98	98	98	98	98
144	0.000666667	0.00683333	0.0366667	0.137667	0.3275	0.480667	0.569667	0.738333	0.961667	1.05167	1.128	1.22767		0	0	0	1	1	1	1	1	1	1	1	1			0	0	0	0.137667	0.3275	0.480667	0.569667	0.738333	0.961667	1.05167	1.128	1.22767			0	0	0	99	99	99	99	99
145.5	0.000666667	0.00883333	0.0376667	0.146667	0.3285	0.491667	0.575667	0.746333	0.970667	1.04767	1.121	1.21267		0	0	0	1	1	1	1	1	1	1	1	1			0	0	0	0.146667	0.3285	0.491667	0.575667	0.746333	0.970667	1.04767	1.121	1.21267			0	0	0	100	100	100	100	100
147	0.00166667	0.00983333	0.0406667	0.146667	0.3335	0.494667	0.580667	0.736333	0.985667	1.04167	1.103	1.19967		0	0	0	1	1	1	1	1	1	1	1	1			0	0	0	0.146667	0.3335	0.494667	0.580667	0.736333	0.985667	1.04167	1.103	1.19967			0	0	0	101	101	101	101	101
148.5	0.00166667	0.00883333	0.0416667	0.152667	0.3375	0.490667	0.598667	0.761333	0.954667	1.06467	1.114	1.21067		0	0	0	1	1	1	1	1	1	1	1	1			0	0	0	0.152667	0.3375	0.490667	0.598667	0.761333	0.954667	1.06467	1.114	1.21067			0	0	0	102	102	102	102	102
150	0.00166667	0.00983333	0.0436667	0.160667	0.3425	0.516667	0.595667	0.756333	0.946667	1.06067	1.13	1.20967		0	0	0	1	1	1	1	1	1	1	1	1			0	0	0	0.160667	0.3425	0.516667	0.595667	0.756333	0.946667	1.06067	1.13	1.20967			0	0	0	103	103	103	103	103
151.5	0.000666667	0.00983333	0.0436667	0.164667	0.3445	0.518667	0.596667	0.744333	0.965667	1.05867	1.138	1.20167		0	0	0	1	1	1	1	1	1	1	1	1			0	0	0	0.164667	0.3445	0.518667	0.596667	0.744333	0.965667	1.05867	1.138	1.20167			0	0	0	104	104	104	104	104
153	0.000666667	0.00883333	0.0446667	0.165667	0.3455	0.522667	0.595667	0.752333	0.967667	1.04767	1.148	1.21067		0	0	0	1	1	1	1	1	1	1	1	1			0	0	0	0.165667	0.3455	0.522667	0.595667	0.752333	0.967667	1.04767	1.148	1.21067			0	0	0	105	105	105	105	105
154.5	0.00266667	0.0108333	0.0476667	0.172667	0.3455	0.515667	0.604667	0.757333	0.981667	1.04267	1.139	1.22967		0	0	0	1	1	1	1	1	1	1	1	1			0	0	0	0.172667	0.3455	0.515667	0.604667	0.757333	0.981667	1.04267	1.139	1.22967			0	0	0	106	106	106	106	106
156	0.00166667	0.0128333	0.0466667	0.180667	0.3475	0.517667	0.600667	0.766333	0.957667	1.05667	1.142	1.23067		0	0	0	1	1	1	1	1	1	1	1	1			0	0	0	0.180667	0.3475	0.517667	0.600667	0.766333	0.957667	1.05667	1.142	1.23067			0	0	0	107	107	107	107	107
157.5	0.000666667	0.0118333	0.0486667	0.183667	0.3485	0.522667	0.615667	0.753333	0.970667	1.07267	1.133	1.22767		0	0	0	1	1	1	1	1	1	1	1	1			0	0	0	0.183667	0.3485	0.522667	0.615667	0.753333	0.970667	1.07267	1.133	1.22767			0	0	0	108	108	108	108	108
159	0.00166667	0.0128333	0.0496667	0.186667	0.3535	0.535667	0.609667	0.759333	0.984667	1.06167	1.152	1.21367		0	0	0	1	1	1	1	1	1	1	1	1			0	0	0	0.186667	0.3535	0.535667	0.609667	0.759333	0.984667	1.06167	1.152	1.21367			0	0	0	109	109	109	109	109
160.5	0.00166667	0.0118333	0.0516667	0.194667	0.3555	0.540667	0.607667	0.769333	1.00667	1.06067	1.153	1.22667		0	0	0	1	1	1	1	1	1	1	1	1			0	0	0	0.194667	0.3555	0.540667	0.607667	0.769333	1.00667	1.06067	1.153	1.22667			0	0	0	110	110	110	110	110
162	0.00366667	0.0148333	0.0556667	0.199667	0.3615	0.541667	0.627667	0.759333	1.00167	1.08267	1.154	1.22167		0	0	0	1	1	1	1	1	1	1	1	1			0	0	0	0.199667	0.3615	0.541667	0.627667	0.759333	1.00167	1.08267	1.154	1.22167			0	0	0	111	111	111	111	111
163.5	0.00166667	0.0148333	0.0556667	0.201667	0.3585	0.550667	0.626667	0.773333	1.00267	1.08467	1.156	1.22967		0	0	0	1	1	1	1	1	1	1	1	1			0	0	0	0.201667	0.3585	0.550667	0.626667	0.773333	1.00267	1.08467	1.156	1.22967			0	0	0	112	112	112	112	112
165	0.00166667	0.0148333	0.0566667	0.201667	0.3625	0.549667	0.628667	0.778333	0.987667	1.09067	1.157	1.23367		0	0	0	1	1	1	1	1	1	1	1	1			0	0	0	0.201667	0.3625	0.549667	0.628667	0.778333	0.987667	1.09067	1.157	1.23367			0	0	0	113	113	113	113	113
166.5	0.00266667	0.0158333	0.0596667	0.209667	0.3615	0.555667	0.630667	0.774333	0.987667	1.09867	1.16	1.22967		0	0	0	1	1	1	1	1	1	1	1	1			0	0	0	0.209667	0.3615	0.555667	0.630667	0.774333	0.987667	1.09867	1.16	1.22967			0	0	0	114	114	114	114	114
168	0.00166667	0.0158333	0.0616667	0.210667	0.3595	0.559667	0.631667	0.782333	1.00167	1.09467	1.171	1.24167		0	0	0	1	1	1	1	1	1	1	1	1			0	0	0	0.210667	0.3595	0.559667	0.631667	0.782333	1.00167	1.09467	1.171	1.24167			0	0	0	115	115	115	115	115
169.5	0.00166667	0.0168333	0.0646667	0.207667	0.3635	0.564667	0.634667	0.781333	1.01367	1.10367	1.171	1.23267		0	0	0	1	1	1	1	1	1	1	1	1			0	0	0	0.207667	0.3635	0.564667	0.634667	0.781333	1.01367	1.10367	1.171	1.23267			0	0	0	116	116	116	116	116
171	0.00266667	0.0178333	0.0666667	0.211667	0.3645	0.561667	0.645667	0.795333	1.01867	1.09867	1.164	1.24567		0	0	0	1	1	1	1	1	1	1	1	1			0	0	0	0.211667	0.3645	0.561667	0.645667	0.795333	1.01867	1.09867	1.164	1.24567			0	0	0	117	117	117	117	117
172.5	0.00166667	0.0178333	0.0676667	0.217667	0.3665	0.560667	0.644667	0.791333	1.00267	1.09067	1.16	1.24367		0	0	0	1	1	1	1	1	1	1	1	1			0	0	0	0.217667	0.3665	0.560667	0.644667	0.791333	1.00267	1.09067	1.16	1.24367			0	0	0	118	118	118	118	118
174	0.00266667	0.0188333	0.0696667	0.218667	0.3635	0.558667	0.650667	0.799333	1.01667	1.10767	1.163	1.24167		0	0	0	1	1	1	1	1	1	1	1	1			0	0	0	0.218667	0.3635	0.558667	0.650667	0.799333	1.01667	1.10767	1.163	1.24167			0	0	0	119	119	119	119	119
175.5	0.00266667	0.0198333	0.0746667	0.219667	0.3705	0.551667	0.648667	0.788333	1.02167	1.11067	1.17	1.25167		0	0	0	1	1	1	1	1	1	1	1	1			0	0	0	0.219667	0.3705	0.551667	0.648667	0.788333	1.02167	1.11067	1.17	1.25167			0	0	0	120	120	120	120	120
177	0.00266667	0.0198333	0.0786667	0.222667	0.3695	0.553667	0.651667	0.792333	1.03167	1.11267	1.18	1.26067		0	0	0	1	1	1	1	1	1	1	1	1			0	0	0	0.222667	0.3695	0.553667	0.651667	0.792333	1.03167	1.11267	1.18	1.26067			0	0	0	121	121	121	121	121
178.5	0.00166667	0.0208333	0.0786667	0.220667	0.3715	0.561667	0.661667	0.803333	1.03167	1.12367	1.174	1.25967		0	0	0	1	1	1	1	1	1	1	1	1			0	0	0	0.220667	0.3715	0.561667	0.661667	0.803333	1.03167	1.12367	1.174	1.25967			0	0	0	122	122	122	122	122
180	0.00366667	0.0218333	0.0826667	0.220667	0.3765	0.568667	0.660667	0.801333	1.04967	1.12667	1.182	1.25667		0	0	1	1	1	1	1	1	1	1	1	1			0	0	0.0826667	0.220667	0.3765	0.568667	0.660667	0.801333	1.04967	1.12667	1.182	1.25667			0	0	123	123	123	123	123	123
181.5	0.00266667	0.0208333	0.0856667	0.224667	0.3805	0.571667	0.675667	0.814333	1.04067	1.12167	1.183	1.26667		0	0	1	1	1	1	1	1	1	1	1	1			0	0	0.0856667	0.224667	0.3805	0.571667	0.675667	0.814333	1.04067	1.12167	1.183	1.26667			0	0	124	124	124	124	124	124
183	0.00366667	0.0228333	0.0896667	0.229667	0.3855	0.571667	0.676667	0.818333	1.04667	1.12267	1.19	1.26467		0	0	1	1	1	1	1	1	1	1	1	1			0	0	0.0896667	0.229667	0.3855	0.571667	0.676667	0.818333	1.04667	1.12267	1.19	1.26467			0	0	125	125	125	125	125	125
184.5	0.00366667	0.0228333	0.0926667	0.229667	0.3865	0.567667	0.680667	0.824333	1.04067	1.12867	1.191	1.26667		0	0	1	1	1	1	1	1	1	1	1	1			0	0	0.0926667	0.229667	0.3865	0.567667	0.680667	0.824333	1.04067	1.12867	1.191	1.26667			0	0	126	126	126	126	126	126
186	0.00266667	0.0218333	0.0956667	0.230667	0.3875	0.582667	0.688667	0.821333	1.05667	1.12667	1.197	1.26567		0	0	1	1	1	1	1	1	1	1	1	1			0	0	0.0956667	0.230667	0.3875	0.582667	0.688667	0.821333	1.05667	1.12667	1.197	1.26567			0	0	127	127	127	127	127	127
187.5	0.00366667	0.0218333	0.100667	0.231667	0.3945	0.588667	0.684667	0.825333	1.06167	1.12767	1.199	1.26667		0	0	1	1	1	1	1	1	1	1	1	1			0	0	0.100667	0.231667	0.3945	0.588667	0.684667	0.825333	1.06167	1.12767	1.199	1.26667			0	0	128	128	128	128	128	128
189	0.00266667	0.0228333	0.103667	0.231667	0.3855	0.569667	0.679667	0.824333	1.06167	1.12167	1.204	1.27367		0	0	1	1	1	1	1	1	1	1	1	1			0	0	0.103667	0.231667	0.3855	0.569667	0.679667	0.824333	1.06167	1.12167	1.204	1.27367			0	0	129	129	129	129	129	129
190.5	0.00366667	0.0228333	0.107667	0.236667	0.3815	0.579667	0.679667	0.827333	1.05867	1.12367	1.196	1.27067		0	0	1	1	1	1	1	1	1	1	1	1			0	0	0.107667	0.236667	0.3815	0.579667	0.679667	0.827333	1.05867	1.12367	1.196	1.27067			0	0	130	130	130	130	130	130
192	0.00366667	0.0238333	0.109667	0.237667	0.3965	0.589667	0.688667	0.829333	1.06667	1.12467	1.201	1.26967		0	0	1	1	1	1	1	1	1	1	1	1			0	0	0.109667	0.237667	0.3965	0.589667	0.688667	0.829333	1.06667	1.12467	1.201	1.26967			0	0	131	131	131	131	131	131
193.5	0.00366667	0.0238333	0.111667	0.235667	0.3995	0.587667	0.694667	0.832333	1.06467	1.11967	1.207	1.26367		0	0	1	1	1	1	1	1	1	1	1	1			0	0	0.111667	0.235667	0.3995	0.587667	0.694667	0.832333	1.06467	1.11967	1.207	1.26367			0	0	132	132	132	132	132	132
195	0.00266667	0.0238333	0.114667	0.236667	0.3985	0.584667	0.709667	0.830333	1.06167	1.12367	1.211	1.26967		0	0	1	1	1	1	1	1	1	1	1	1			0	0	0.114667	0.236667	0.3985	0.584667	0.709667	0.830333	1.06167	1.12367	1.211	1.26967			0	0	133	133	133	133	133	133
196.5	0.00366667	0.0228333	0.118667	0.241667	0.4005	0.597667	0.704667	0.835333	1.06067	1.12967	1.215	1.27267		0	0	1	1	1	1	1	1	1	1	1	1			0	0	0.118667	0.241667	0.4005	0.597667	0.704667	0.835333	1.06067	1.12967	1.215	1.27267			0	0	134	134	134	134	134	134
198	0.00466667	0.0238333	0.122667	0.245667	0.4025	0.602667	0.702667	0.833333	1.06567	1.13667	1.208	1.27067		0	0	1	1	1	1	1	1	1	1	1	1			0	0	0.122667	0.245667	0.4025	0.602667	0.702667	0.833333	1.06567	1.13667	1.208	1.27067			0	0	135	135	135	135	135	135
199.5	0.00566667	0.0238333	0.124667	0.244667	0.4065	0.602667	0.701667	0.833333	1.06967	1.13867	1.211	1.26767		0	0	1	1	1	1	1	1	1	1	1	1			0	0	0.124667	0.244667	0.4065	0.602667	0.701667	0.833333	1.06967	1.13867	1.211	1.26767			0	0	136	136	136	136	136	136
201	0.00466667	0.0248333	0.128667	0.245667	0.4075	0.599667	0.712667	0.842333	1.06967	1.14267	1.213	1.27267		0	0	1	1	1	1	1	1	1	1	1	1			0	0	0.128667	0.245667	0.4075	0.599667	0.712667	0.842333	1.06967	1.14267	1.213	1.27267			0	0	137	137	137	137	137	137
202.5	0.00466667	0.0248333	0.132667	0.248667	0.4145	0.601667	0.710667	0.845333	1.07267	1.14567	1.214	1.27167		0	0	1	1	1	1	1	1	1	1	1	1			0	0	0.132667	0.248667	0.4145	0.601667	0.710667	0.845333	1.07267	1.14567	1.214	1.27167			0	0	138	138	138	138	138	138
204	0.00466667	0.0238333	0.133667	0.252667	0.4175	0.601667	0.710667	0.850333	1.07867	1.14167	1.212	1.27967		0	0	1	1	1	1	1	1	1	1	1	1			0	0	0.133667	0.252667	0.4175	0.601667	0.710667	0.850333	1.07867	1.14167	1.212	1.27967			0	0	139	139	139	139	139	139
205.5	0.00366667	0.0228333	0.134667	0.253667	0.4185	0.605667	0.717667	0.844333	1.07667	1.14267	1.207	1.27867		0	0	1	1	1	1	1	1	1	1	1	1			0	0	0.134667	0.253667	0.4185	0.605667	0.717667	0.844333	1.07667	1.14267	1.207	1.27867			0	0	140	140	140	140	140	140
207	0.00566667	0.0238333	0.136667	0.253667	0.4225	0.603667	0.721667	0.847333	1.08267	1.14967	1.213	1.28067		0	0	1	1	1	1	1	1	1	1	1	1			0	0	0.136667	0.253667	0.4225	0.603667	0.721667	0.847333	1.08267	1.14967	1.213	1.28067			0	0	141	141	141	141	141	141
208.5	0.00566667	0.0238333	0.138667	0.259667	0.4215	0.604667	0.718667	0.851333	1.08267	1.15067	1.216	1.28167		0	0	1	1	1	1	1	1	1	1	1	1			0	0	0.138667	0.259667	0.4215	0.604667	0.718667	0.851333	1.08267	1.15067	1.216	1.28167			0	0	142	142	142	142	142	142
210	0.00566667	0.0238333	0.139667	0.259667	0.4235	0.616667	0.722667	0.846333	1.07667	1.15567	1.212	1.28667		0	0	1	1	1	1	1	1	1	1	1	1			0	0	0.139667	0.259667	0.4235	0.616667	0.722667	0.846333	1.07667	1.15567	1.212	1.28667			0	0	143	143	143	143	143	143
211.5	0.00666667	0.0238333	0.142667	0.258667	0.4225	0.612667	0.726667	0.851333	1.07767	1.16067	1.212	1.28967		0	0	1	1	1	1	1	1	1	1	1	1			0	0	0.142667	0.258667	0.4225	0.612667	0.726667	0.851333	1.07767	1.16067	1.212	1.28967			0	0	144	144	144	144	144	144
213	0.00566667	0.0218333	0.143667	0.261667	0.4265	0.616667	0.726667	0.852333	1.07867	1.15967	1.21	1.28567		0	0	1	1	1	1	1	1	1	1	1	1			0	0	0.143667	0.261667	0.4265	0.616667	0.726667	0.852333	1.07867	1.15967	1.21	1.28567			0	0	145	145	145	145	145	145
214.5	0.00566667	0.0218333	0.145667	0.263667	0.4345	0.616667	0.726667	0.854333	1.07967	1.15967	1.214	1.29067		0	0	1	1	1	1	1	1	1	1	1	1			0	0	0.145667	0.263667	0.4345	0.616667	0.726667	0.854333	1.07967	1.15967	1.214	1.29067			0	0	146	146	146	146	146	146
216	0.00666667	0.0228333	0.146667	0.264667	0.4335	0.625667	0.730667	0.854333	1.08267	1.15867	1.215	1.29167		0	0	1	1	1	1	1	1	1	1	1	1			0	0	0.146667	0.264667	0.4335	0.625667	0.730667	0.854333	1.08267	1.15867	1.215	1.29167			0	0	147	147	147	147	147	147
217.5	0.00766667	0.0248333	0.148667	0.268667	0.4355	0.628667	0.738667	0.858333	1.08467	1.16467	1.218	1.29367		0	0	1	1	1	1	1	1	1	1	1	1			0	0	0.148667	0.268667	0.4355	0.628667	0.738667	0.858333	1.08467	1.16467	1.218	1.29367			0	0	148	148	148	148	148	148
219	0.00666667	0.0228333	0.149667	0.266667	0.4355	0.627667	0.734667	0.853333	1.08267	1.17067	1.218	1.29667		0	0	1	1	1	1	1	1	1	1	1	1			0	0	0.149667	0.266667	0.4355	0.627667	0.734667	0.853333	1.08267	1.17067	1.218	1.29667			0	0	149	149	149	149	149	149
220.5	0.00766667	0.0228333	0.149667	0.265667	0.4445	0.630667	0.734667	0.855333	1.08167	1.17067	1.22	1.29567		0	0	1	1	1	1	1	1	1	1	1	1			0	0	0.149667	0.265667	0.4445	0.630667	0.734667	0.855333	1.08167	1.17067	1.22	1.29567			0	0	150	150	150	150	150	150
222	0.00966667	0.0248333	0.150667	0.271667	0.4475	0.632667	0.731667	0.858333	1.08267	1.16967	1.219	1.29467		0	0	1	1	1	1	1	1	1	1	1	1			0	0	0.150667	0.271667	0.4475	0.632667	0.731667	0.858333	1.08267	1.16967	1.219	1.29467			0	0	151	151	151	151	151	151
223.5	0.00766667	0.0238333	0.151667	0.276667	0.4435	0.634667	0.728667	0.860333	1.08767	1.16867	1.223	1.29667		0	0	1	1	1	1	1	1	1	1	1	1			0	0	0.151667	0.276667	0.4435	0.634667	0.728667	0.860333	1.08767	1.16867	1.223	1.29667			0	0	152	152	152	152	152	152
225	0.00966667	0.0258333	0.153667	0.274667	0.4495	0.637667	0.732667	0.863333	1.09167	1.17167	1.227	1.30267		0	0	1	1	1	1	1	1	1	1	1	1			0	0	0.153667	0.274667	0.4495	0.637667	0.732667	0.863333	1.09167	1.17167	1.227	1.30267			0	0	153	153	153	153	153	153
226.5	0.00866667	0.0238333	0.152667	0.276667	0.4455	0.634667	0.734667	0.866333	1.08867	1.17067	1.226	1.29967		0	0	1	1	1	1	1	1	1	1	1	1			0	0	0.152667	0.276667	0.4455	0.634667	0.734667	0.866333	1.08867	1.17067	1.226	1.29967			0	0	154	154	154	154	154	154
228	0.00966667	0.0258333	0.153667	0.281667	0.4505	0.640667	0.737667	0.866333	1.09267	1.17067	1.23	1.29767		0	0	1	1	1	1	1	1	1	1	1	1			0	0	0.153667	0.281667	0.4505	0.640667	0.737667	0.866333	1.09267	1.17067	1.23	1.29767			0	0	155	155	155	155	155	155
229.5	0.00966667	0.0278333	0.155667	0.281667	0.4555	0.645667	0.733667	0.867333	1.09567	1.17467	1.237	1.30167		0	0	1	1	1	1	1	1	1	1	1	1			0	0	0.155667	0.281667	0.4555	0.645667	0.733667	0.867333	1.09567	1.17467	1.237	1.30167			0	0	156	156	156	156	156	156
231	0.0106667	0.0288333	0.154667	0.288667	0.4605	0.645667	0.740667	0.873333	1.09667	1.17367	1.237	1.30667		0	0	1	1	1	1	1	1	1	1	1	1			0	0	0.154667	0.288667	0.4605	0.645667	0.740667	0.873333	1.09667	1.17367	1.237	1.30667			0	0	157	157	157	157	157	157
232.5	0.0106667	0.0298333	0.156667	0.282667	0.4635	0.643667	0.743667	0.877333	1.09867	1.17467	1.236	1.30767		0	0	1	1	1	1	1	1	1	1	1	1			0	0	0.156667	0.282667	0.4635	0.643667	0.743667	0.877333	1.09867	1.17467	1.236	1.30767			0	0	158	158	158	158	158	158
234	0.0106667	0.0308333	0.156667	0.286667	0.4705	0.652667	0.741667	0.874333	1.09967	1.17567	1.237	1.30267		0	0	1	1	1	1	1	1	1	1	1	1			0	0	0.156667	0.286667	0.4705	0.652667	0.741667	0.874333	1.09967	1.17567	1.237	1.30267			0	0	159	159	159	159	159	159
235.5	0.0106667	0.0298333	0.156667	0.291667	0.4605	0.654667	0.739667	0.878333	1.09767	1.17467	1.238	1.30667		0	0	1	1	1	1	1	1	1	1	1	1			0	0	0.156667	0.291667	0.4605	0.654667	0.739667	0.878333	1.09767	1.17467	1.238	1.30667			0	0	160	160	160	160	160	160
237	0.0106667	0.0328333	0.158667	0.297667	0.4645	0.652667	0.744667	0.883333	1.10267	1.17667	1.238	1.31267		0	0	1	1	1	1	1	1	1	1	1	1			0	0	0.158667	0.297667	0.4645	0.652667	0.744667	0.883333	1.10267	1.17667	1.238	1.31267			0	0	161	161	161	161	161	161
238.5	0.0116667	0.0348333	0.157667	0.298667	0.4625	0.655667	0.748667	0.885333	1.10367	1.17267	1.241	1.31367		0	0	1	1	1	1	1	1	1	1	1	1			0	0	0.157667	0.298667	0.4625	0.655667	0.748667	0.885333	1.10367	1.17267	1.241	1.31367			0	0	162	162	162	162	162	162
240	0.0116667	0.0358333	0.158667	0.298667	0.4675	0.657667	0.750667	0.889333	1.10967	1.17267	1.241	1.31167		0	0	1	1	1	1	1	1	1	1	1	1			0	0	0.158667	0.298667	0.4675	0.657667	0.750667	0.889333	1.10967	1.17267	1.241	1.31167			0	0	163	163	163	163	163	163
241.5	0.0136667	0.0388333	0.162667	0.298667	0.4785	0.661667	0.748667	0.890333	1.10967	1.17267	1.244	1.31567		0	0	1	1	1	1	1	1	1	1	1	1			0	0	0.162667	0.298667	0.4785	0.661667	0.748667	0.890333	1.10967	1.17267	1.244	1.31567			0	0	164	164	164	164	164	164
243	0.0136667	0.0398333	0.158667	0.298667	0.4765	0.667667	0.745667	0.892333	1.10967	1.17467	1.242	1.31567		0	0	1	1	1	1	1	1	1	1	1	1			0	0	0.158667	0.298667	0.4765	0.667667	0.745667	0.892333	1.10967	1.17467	1.242	1.31567			0	0	165	165	165	165	165	165
244.5	0.0136667	0.0408333	0.162667	0.304667	0.4765	0.670667	0.748667	0.893333	1.11267	1.17467	1.241	1.31567		0	1	1	1	1	1	1	1	1	1	1	1			0	0.0408333	0.162667	0.304667	0.4765	0.670667	0.748667	0.893333	1.11267	1.17467	1.241	1.31567			0	166	166	166	166	166	166	166
246	0.0116667	0.0418333	0.162667	0.303667	0.4715	0.668667	0.756667	0.891333	1.11367	1.17567	1.241	1.31867		0	1	1	1	1	1	1	1	1	1	1	1			0	0.0418333	0.162667	0.303667	0.4715	0.668667	0.756667	0.891333	1.11367	1.17567	1.241	1.31867			0	167	167	167	167	167	167	167
247.5	0.0136667	0.0448333	0.161667	0.307667	0.4735	0.673667	0.757667	0.893333	1.11467	1.17867	1.243	1.32067		0	1	1	1	1	1	1	1	1	1	1	1			0	0.0448333	0.161667	0.307667	0.4735	0.673667	0.757667	0.893333	1.11467	1.17867	1.243	1.32067			0	168	168	168	168	168	168	168
249	0.0146667	0.0448333	0.163667	0.311667	0.4795	0.670667	0.759667	0.894333	1.11567	1.17767	1.243	1.32167		0	1	1	1	1	1	1	1	1	1	1	1			0	0.0448333	0.163667	0.311667	0.4795	0.670667	0.759667	0.894333	1.11567	1.17767	1.243	1.32167			0	169	169	169	169	169	169	169
250.5	0.0156667	0.0468333	0.164667	0.313667	0.4765	0.669667	0.759667	0.898333	1.11967	1.17567	1.243	1.32167		0	1	1	1	1	1	1	1	1	1	1	1			0	0.0468333	0.164667	0.313667	0.4765	0.669667	0.759667	0.898333	1.11967	1.17567	1.243	1.32167			0	170	170	170	170	170	170	170
252	0.0146667	0.0478333	0.167667	0.312667	0.4785	0.669667	0.762667	0.897333	1.11767	1.17967	1.243	1.32367		0	1	1	1	1	1	1	1	1	1	1	1			0	0.0478333	0.167667	0.312667	0.4785	0.669667	0.762667	0.897333	1.11767	1.17967	1.243	1.32367			0	171	171	171	171	171	171	171
253.5	0.0146667	0.0498333	0.163667	0.314667	0.4755	0.672667	0.760667	0.901333	1.11867	1.18167	1.245	1.32567		0	1	1	1	1	1	1	1	1	1	1	1			0	0.0498333	0.163667	0.314667	0.4755	0.672667	0.760667	0.901333	1.11867	1.18167	1.245	1.32567			0	172	172	172	172	172	172	172
255	0.0166667	0.0528333	0.166667	0.318667	0.4805	0.671667	0.762667	0.901333	1.11767	1.18367	1.248	1.32967		0	1	1	1	1	1	1	1	1	1	1	1			0	0.0528333	0.166667	0.318667	0.4805	0.671667	0.762667	0.901333	1.11767	1.18367	1.248	1.32967			0	173	173	173	173	173	173	173
256.5	0.0166667	0.0548333	0.167667	0.316667	0.4795	0.674667	0.768667	0.902333	1.11967	1.18467	1.248	1.33167		0	1	1	1	1	1	1	1	1	1	1	1			0	0.0548333	0.167667	0.316667	0.4795	0.674667	0.768667	0.902333	1.11967	1.18467	1.248	1.33167			0	174	174	174	174	174	174	174
258	0.0166667	0.0548333	0.167667	0.320667	0.4785	0.679667	0.770667	0.905333	1.12067	1.18967	1.248	1.33167		0	1	1	1	1	1	1	1	1	1	1	1			0	0.0548333	0.167667	0.320667	0.4785	0.679667	0.770667	0.905333	1.12067	1.18967	1.248	1.33167			0	175	175	175	175	175	175	175
259.5	0.0166667	0.0568333	0.165667	0.319667	0.4795	0.681667	0.768667	0.902333	1.11867	1.18967	1.248	1.33267		0	1	1	1	1	1	1	1	1	1	1	1			0	0.0568333	0.165667	0.319667	0.4795	0.681667	0.768667	0.902333	1.11867	1.18967	1.248	1.33267			0	176	176	176	176	176	176	176
261	0.0166667	0.0588333	0.170667	0.321667	0.4855	0.683667	0.774667	0.901333	1.12167	1.19267	1.25	1.33367		0	1	1	1	1	1	1	1	1	1	1	1			0	0.0588333	0.170667	0.321667	0.4855	0.683667	0.774667	0.901333	1.12167	1.19267	1.25	1.33367			0	177	177	177	177	177	177	177
262.5	0.0166667	0.0598333	0.168667	0.319667	0.4885	0.683667	0.775667	0.902333	1.11667	1.19367	1.252	1.33267		0	1	1	1	1	1	1	1	1	1	1	1			0	0.0598333	0.168667	0.319667	0.4885	0.683667	0.775667	0.902333	1.11667	1.19367	1.252	1.33267			0	178	178	178	178	178	178	178
264	0.0186667	0.0618333	0.168667	0.324667	0.4825	0.687667	0.778667	0.904333	1.11767	1.19567	1.252	1.33667		0	1	1	1	1	1	1	1	1	1	1	1			0	0.0618333	0.168667	0.324667	0.4825	0.687667	0.778667	0.904333	1.11767	1.19567	1.252	1.33667			0	179	179	179	179	179	179	179
265.5	0.0176667	0.0638333	0.170667	0.329667	0.4865	0.685667	0.777667	0.903333	1.11767	1.19767	1.256	1.33267		0	1	1	1	1	1	1	1	1	1	1	1			0	0.0638333	0.170667	0.329667	0.4865	0.685667	0.777667	0.903333	1.11767	1.19767	1.256	1.33267			0	180	180	180	180	180	180	180
267	0.0176667	0.0648333	0.172667	0.331667	0.4875	0.691667	0.778667	0.904333	1.11767	1.19767	1.256	1.33367		0	1	1	1	1	1	1	1	1	1	1	1			0	0.0648333	0.172667	0.331667	0.4875	0.691667	0.778667	0.904333	1.11767	1.19767	1.256	1.33367			0	181	181	181	181	181	181	181
268.5	0.0186667	0.0658333	0.171667	0.328667	0.4825	0.691667	0.782667	0.905333	1.11867	1.19967	1.26	1.33567		0	1	1	1	1	1	1	1	1	1	1	1			0	0.0658333	0.171667	0.328667	0.4825	0.691667	0.782667	0.905333	1.11867	1.19967	1.26	1.33567			0	182	182	182	182	182	182	182
270	0.0186667	0.0658333	0.173667	0.325667	0.4815	0.688667	0.783667	0.900333	1.11867	1.19967	1.26	1.33667		0	1	1	1	1	1	1	1	1	1	1	1			0	0.0658333	0.173667	0.325667	0.4815	0.688667	0.783667	0.900333	1.11867	1.19967	1.26	1.33667			0	183	183	183	183	183	183	183
[truncated: 54 more columns]

## Sheet: 100mM_inositol
	2021-12-17 W42Q X uM with OxD 0.2, 2mM (GSH+2GSSG), EDTA 1 mM, PIPES 10 mM pH6.7 NaCl 150 mM T = 37 C, 100mM inositol													2021-12-17 W42Q X uM with OxD 0.2, 2mM (GSH+2GSSG), EDTA 1 mM, PIPES 10 mM pH6.7 NaCl 150 mM T = 37 C, 100mM inositol														2021-12-17 W42Q X uM with OxD 0.2, 2mM (GSH+2GSSG), EDTA 1 mM, PIPES 10 mM pH6.7 NaCl 150 mM T = 37 C, 100mM inositol														2021-12-17 W42Q X uM with OxD 0.2, 2mM (GSH+2GSSG), EDTA 1 mM, PIPES 10 mM pH6.7 NaCl 150 mM T = 37 C, 100mM inositol
	20	30	40	50	65	80	95	110	125	140	155	170		20	30	40	50	65	80	95	110	125	140	155	170			20	30	40	50	65	80	95	110	125	140	155	170			20	30	40	50	65	80	95	110
0	0.00366667	0.000333333	0.003	0.001	-0.0005	0.0005	0.001	0.00216667	0.000166667	-0.0005	0	0.000666667		0	0	0	0	0	0	0	0	0	0	0	0			0	0	0	0	0	0	0	0	0	0	0	0			0	0	0	0	0	0	0	0
1.5	0.00166667	0.000333333	0.003	0	0.0005	-0.0005	0.001	0.00116667	0.000166667	-0.0015	0.001	-0.00133333		0	0	0	0	0	0	0	0	0	0	0	0			0	0	0	0	0	0	0	0	0	0	0	0			0	0	0	0	0	0	0	0
3	0.00166667	-0.000666667	0.001	0	0.0005	0.0005	0	-0.000833333	-0.000833333	-0.0005	-0.001	-0.000333333		0	0	0	0	0	0	0	0	0	0	0	0			0	0	0	0	0	0	0	0	0	0	0	0			0	0	0	0	0	0	0	0
4.5	0.00266667	0.000333333	0.002	0.001	0.0005	0.0005	-0.001	-0.000833333	0.000166667	-0.0005	-0.001	0.000666667		0	0	0	0	0	0	0	0	0	0	0	0			0	0	0	0	0	0	0	0	0	0	0	0			0	0	0	0	0	0	0	0
6	0.00166667	-0.00166667	0.001	0.001	0.0005	0.0005	0	0.000166667	0.000166667	-0.0005	0	0.000666667		0	0	0	0	0	0	0	0	0	0	0	0			0	0	0	0	0	0	0	0	0	0	0	0			0	0	0	0	0	0	0	0
7.5	-0.000333333	0.000333333	0	0.001	0.0005	-0.0005	-0.001	-0.000833333	0.000166667	0.0005	-0.001	-0.000333333		0	0	0	0	0	0	0	0	0	0	0	0			0	0	0	0	0	0	0	0	0	0	0	0			0	0	0	0	0	0	0	0
9	0.00166667	0.000333333	0.001	0.001	0.0015	0.0015	0.001	0.00116667	0.00116667	-0.0005	0.002	0.000666667		0	0	0	0	0	0	0	0	0	0	0	0			0	0	0	0	0	0	0	0	0	0	0	0			0	0	0	0	0	0	0	0
10.5	-0.000333333	0.000333333	0	0	-0.0005	0.0005	0	0.00116667	-0.000833333	0.0005	0	0.000666667		0	0	0	0	0	0	0	0	0	0	0	0			0	0	0	0	0	0	0	0	0	0	0	0			0	0	0	0	0	0	0	0
12	-0.000333333	-0.000666667	-0.001	-0.001	-0.0015	-0.0005	-0.001	-0.000833333	-0.000833333	-0.0015	-0.001	-0.00133333		0	0	0	0	0	0	0	0	0	0	0	0			0	0	0	0	0	0	0	0	0	0	0	0			0	0	0	0	0	0	0	0
13.5	0.000666667	0.000333333	0	0	0.0005	0.0005	0.002	0.000166667	0.00116667	0.0015	0.001	0.000666667		0	0	0	0	0	0	0	0	0	0	0	0			0	0	0	0	0	0	0	0	0	0	0	0			0	0	0	0	0	0	0	0
15	-0.00133333	-0.000666667	0	-0.001	-0.0005	-0.0015	-0.001	-0.000833333	-0.000833333	-0.0005	-0.001	-0.000333333		0	0	0	0	0	0	0	0	0	0	0	0			0	0	0	0	0	0	0	0	0	0	0	0			0	0	0	0	0	0	0	0
16.5	-0.00133333	0.000333333	0	0.001	-0.0005	0.0005	-0.001	0.00116667	0.000166667	0.0015	0	-0.000333333		0	0	0	0	0	0	0	0	0	0	0	0			0	0	0	0	0	0	0	0	0	0	0	0			0	0	0	0	0	0	0	0
18	-0.00233333	0.000333333	-0.001	0	-0.0005	-0.0005	-0.001	0.000166667	0.000166667	-0.0005	-0.001	-0.000333333		0	0	0	0	0	0	0	0	0	0	0	0			0	0	0	0	0	0	0	0	0	0	0	0			0	0	0	0	0	0	0	0
19.5	-0.00133333	-0.000666667	0	0	-0.0005	-0.0005	-0.001	-0.000833333	-0.00183333	-0.0005	-0.001	-0.000333333		0	0	0	0	0	0	0	0	0	0	0	0			0	0	0	0	0	0	0	0	0	0	0	0			0	0	0	0	0	0	0	0
21	-0.00133333	0.00133333	0	-0.001	-0.0005	-0.0005	0.001	0.000166667	-0.000833333	-0.0005	0	0.000666667		0	0	0	0	0	0	0	0	0	0	0	0			0	0	0	0	0	0	0	0	0	0	0	0			0	0	0	0	0	0	0	0
22.5	-0.00233333	0.000333333	-0.001	-0.001	-0.0005	-0.0015	0.001	-0.00183333	-0.000833333	-0.0005	-0.001	-0.000333333		0	0	0	0	0	0	0	0	0	0	0	0			0	0	0	0	0	0	0	0	0	0	0	0			0	0	0	0	0	0	0	0
24	-0.000333333	0.000333333	0	0	0.0005	0.0005	0	0.00116667	0.00116667	-0.0005	0.002	0.00166667		0	0	0	0	0	0	0	0	0	0	0	0			0	0	0	0	0	0	0	0	0	0	0	0			0	0	0	0	0	0	0	0
25.5	-0.00133333	-0.000666667	-0.001	-0.001	0.0005	0.0005	0.001	0.000166667	0.000166667	-0.0005	0.001	0.00166667		0	0	0	0	0	0	0	0	0	0	0	0			0	0	0	0	0	0	0	0	0	0	0	0			0	0	0	0	0	0	0	0
27	-0.00233333	0.000333333	-0.001	-0.001	-0.0005	-0.0005	0	-0.000833333	0.000166667	-0.0005	0.001	0.00266667		0	0	0	0	0	0	0	0	0	0	0	0			0	0	0	0	0	0	0	0	0	0	0	0			0	0	0	0	0	0	0	0
28.5	-0.00133333	-0.000666667	0	-0.001	-0.0005	0.0005	0	0.000166667	0.000166667	0.0015	0	0.00366667		0	0	0	0	0	0	0	0	0	0	0	0			0	0	0	0	0	0	0	0	0	0	0	0			0	0	0	0	0	0	0	0
30	-0.00233333	0.000333333	-0.001	0	-0.0005	-0.0005	0	0.00116667	0.000166667	0.0005	0.001	0.00766667		0	0	0	0	0	0	0	0	0	0	0	0			0	0	0	0	0	0	0	0	0	0	0	0			0	0	0	0	0	0	0	0
31.5	-0.00233333	-0.00166667	-0.001	-0.001	-0.0015	-0.0015	0	-0.000833333	-0.00183333	0.0005	0.002	0.0156667		0	0	0	0	0	0	0	0	0	0	0	0			0	0	0	0	0	0	0	0	0	0	0	0			0	0	0	0	0	0	0	0
33	-0.00233333	-0.00166667	-0.001	-0.001	-0.0005	-0.0005	0	0.00116667	0.00116667	0.0015	0.005	0.0386667		0	0	0	0	0	0	0	0	0	0	0	0			0	0	0	0	0	0	0	0	0	0	0	0			0	0	0	0	0	0	0	0
34.5	-0.00233333	0.000333333	0	0	-0.0005	0.0005	0	0.00116667	0.000166667	0.0025	0.012	0.0646667		0	0	0	0	0	0	0	0	0	0	0	1			0	0	0	0	0	0	0	0	0	0	0	0.0646667			0	0	0	0	0	0	0	0
36	-0.00233333	0.000333333	-0.001	-0.001	-0.0015	0.0005	0	0.00116667	0.00216667	0.0035	0.02	0.101667		0	0	0	0	0	0	0	0	0	0	0	1			0	0	0	0	0	0	0	0	0	0	0	0.101667			0	0	0	0	0	0	0	0
37.5	-0.00233333	0.000333333	-0.003	-0.001	0.0005	0.0005	0	0.00116667	0.00216667	0.0085	0.035	0.150667		0	0	0	0	0	0	0	0	0	0	0	1			0	0	0	0	0	0	0	0	0	0	0	0.150667			0	0	0	0	0	0	0	0
39	-0.00333333	0.000333333	-0.001	0	-0.0005	-0.0005	-0.001	0.00216667	0.00416667	0.0145	0.058	0.203667		0	0	0	0	0	0	0	0	0	0	1	1			0	0	0	0	0	0	0	0	0	0	0.058	0.203667			0	0	0	0	0	0	0	0
40.5	-0.00233333	-0.000666667	-0.001	-0.001	0.0005	0.0005	0	0.00216667	0.00616667	0.0245	0.086	0.257667		0	0	0	0	0	0	0	0	0	0	1	1			0	0	0	0	0	0	0	0	0	0	0.086	0.257667			0	0	0	0	0	0	0	0
42	-0.00233333	-0.000666667	-0.001	-0.001	-0.0005	0.0005	0.001	0.00216667	0.0101667	0.0405	0.121	0.304667		0	0	0	0	0	0	0	0	0	0	1	1			0	0	0	0	0	0	0	0	0	0	0.121	0.304667			0	0	0	0	0	0	0	0
43.5	-0.00233333	0.000333333	0	-0.001	-0.0015	0.0005	0.001	0.00316667	0.0161667	0.0575	0.166	0.357667		0	0	0	0	0	0	0	0	0	0	1	1			0	0	0	0	0	0	0	0	0	0	0.166	0.357667			0	0	0	0	0	0	0	0
45	-0.00333333	-0.000666667	-0.001	0	-0.0015	-0.0005	0.002	0.00416667	0.0231667	0.0805	0.209	0.405667		0	0	0	0	0	0	0	0	0	1	1	1			0	0	0	0	0	0	0	0	0	0.0805	0.209	0.405667			0	0	0	0	0	0	0	0
46.5	-0.00233333	-0.000666667	0	0	-0.0005	-0.0005	0.002	0.00716667	0.0371667	0.1075	0.251	0.446667		0	0	0	0	0	0	0	0	0	1	1	1			0	0	0	0	0	0	0	0	0	0.1075	0.251	0.446667			0	0	0	0	0	0	0	0
48	-0.00133333	-0.000666667	0	0.001	0.0015	0.0025	0.002	0.0101667	0.0531667	0.1405	0.297	0.495667		0	0	0	0	0	0	0	0	0	1	1	1			0	0	0	0	0	0	0	0	0	0.1405	0.297	0.495667			0	0	0	0	0	0	0	0
49.5	-0.00233333	-0.000666667	-0.001	-0.002	-0.0015	0.0015	0.002	0.0151667	0.0721667	0.1765	0.34	0.525667		0	0	0	0	0	0	0	0	0	1	1	1			0	0	0	0	0	0	0	0	0	0.1765	0.34	0.525667			0	0	0	0	0	0	0	0
51	-0.00433333	0.000333333	-0.002	-0.002	-0.0005	0.0025	0.002	0.0211667	0.0941667	0.2115	0.378	0.555667		0	0	0	0	0	0	0	0	0	1	1	1			0	0	0	0	0	0	0	0	0	0.2115	0.378	0.555667			0	0	0	0	0	0	0	0
52.5	-0.00233333	0.000333333	0	0.001	0.0015	0.0035	0.006	0.0291667	0.122167	0.2465	0.417	0.586667		0	0	0	0	0	0	0	0	1	1	1	1			0	0	0	0	0	0	0	0	0.122167	0.2465	0.417	0.586667			0	0	0	0	0	0	0	0
54	-0.00433333	-0.000666667	-0.001	-0.001	0.0005	0.0035	0.005	0.0391667	0.148167	0.2795	0.446	0.607667		0	0	0	0	0	0	0	0	1	1	1	1			0	0	0	0	0	0	0	0	0.148167	0.2795	0.446	0.607667			0	0	0	0	0	0	0	0
55.5	-0.00133333	0.00133333	0	0.001	0.0015	0.0045	0.009	0.0521667	0.180167	0.3215	0.474	0.630667		0	0	0	0	0	0	0	1	1	1	1	1			0	0	0	0	0	0	0	0.0521667	0.180167	0.3215	0.474	0.630667			0	0	0	0	0	0	0	40
57	-0.00133333	0.00133333	0	0.001	0.0015	0.0045	0.011	0.0641667	0.203167	0.3505	0.499	0.655667		0	0	0	0	0	0	0	1	1	1	1	1			0	0	0	0	0	0	0	0.0641667	0.203167	0.3505	0.499	0.655667			0	0	0	0	0	0	0	41
58.5	-0.00233333	0.00133333	0	-0.001	0.0015	0.0055	0.013	0.0841667	0.231167	0.3785	0.522	0.666667		0	0	0	0	0	0	0	1	1	1	1	1			0	0	0	0	0	0	0	0.0841667	0.231167	0.3785	0.522	0.666667			0	0	0	0	0	0	0	42
60	-0.00233333	0.000333333	0	0.001	0.0005	0.0045	0.018	0.101167	0.264167	0.4085	0.538	0.675667		0	0	0	0	0	0	0	1	1	1	1	1			0	0	0	0	0	0	0	0.101167	0.264167	0.4085	0.538	0.675667			0	0	0	0	0	0	0	43
61.5	-0.00133333	0.000333333	0.001	0.001	0.0015	0.0055	0.023	0.119167	0.291167	0.4265	0.554	0.699667		0	0	0	0	0	0	0	1	1	1	1	1			0	0	0	0	0	0	0	0.119167	0.291167	0.4265	0.554	0.699667			0	0	0	0	0	0	0	44
63	-0.00333333	0.000333333	0	-0.001	0.0005	0.0065	0.03	0.137167	0.314167	0.4415	0.578	0.707667		0	0	0	0	0	0	0	1	1	1	1	1			0	0	0	0	0	0	0	0.137167	0.314167	0.4415	0.578	0.707667			0	0	0	0	0	0	0	45
64.5	-0.00133333	0.000333333	0	0	0.0005	0.0075	0.038	0.152167	0.330167	0.4695	0.595	0.728667		0	0	0	0	0	0	0	1	1	1	1	1			0	0	0	0	0	0	0	0.152167	0.330167	0.4695	0.595	0.728667			0	0	0	0	0	0	0	46
66	-0.000333333	0.00133333	0.001	0.002	0.0035	0.0115	0.049	0.174167	0.355167	0.4835	0.612	0.742667		0	0	0	0	0	0	0	1	1	1	1	1			0	0	0	0	0	0	0	0.174167	0.355167	0.4835	0.612	0.742667			0	0	0	0	0	0	0	47
67.5	-0.00333333	-0.000666667	-0.001	0	0.0015	0.0115	0.056	0.188167	0.379167	0.4915	0.622	0.737667		0	0	0	0	0	0	1	1	1	1	1	1			0	0	0	0	0	0	0.056	0.188167	0.379167	0.4915	0.622	0.737667			0	0	0	0	0	0	48	48
69	-0.00433333	0.000333333	-0.001	0	0.0025	0.0135	0.066	0.205167	0.392167	0.5085	0.626	0.752667		0	0	0	0	0	0	1	1	1	1	1	1			0	0	0	0	0	0	0.066	0.205167	0.392167	0.5085	0.626	0.752667			0	0	0	0	0	0	49	49
70.5	-0.00333333	-0.00166667	0	0	0.0015	0.0165	0.079	0.220167	0.406167	0.5295	0.641	0.778667		0	0	0	0	0	0	1	1	1	1	1	1			0	0	0	0	0	0	0.079	0.220167	0.406167	0.5295	0.641	0.778667			0	0	0	0	0	0	50	50
72	-0.00233333	0.00133333	0	-0.001	0.0025	0.0195	0.092	0.231167	0.419167	0.5425	0.664	0.761667		0	0	0	0	0	0	1	1	1	1	1	1			0	0	0	0	0	0	0.092	0.231167	0.419167	0.5425	0.664	0.761667			0	0	0	0	0	0	51	51
73.5	-0.00233333	0.000333333	-0.001	0.001	0.0035	0.0235	0.105	0.244167	0.440167	0.5495	0.665	0.794667		0	0	0	0	0	0	1	1	1	1	1	1			0	0	0	0	0	0	0.105	0.244167	0.440167	0.5495	0.665	0.794667			0	0	0	0	0	0	52	52
75	-0.00233333	0.00133333	0.001	0.001	0.0045	0.0295	0.117	0.260167	0.455167	0.5725	0.674	0.784667		0	0	0	0	0	0	1	1	1	1	1	1			0	0	0	0	0	0	0.117	0.260167	0.455167	0.5725	0.674	0.784667			0	0	0	0	0	0	53	53
76.5	-0.00233333	0.000333333	0	0	0.0035	0.0345	0.129	0.268167	0.467167	0.5905	0.7	0.794667		0	0	0	0	0	0	1	1	1	1	1	1			0	0	0	0	0	0	0.129	0.268167	0.467167	0.5905	0.7	0.794667			0	0	0	0	0	0	54	54
78	-0.00233333	0.000333333	0	0	0.0045	0.0405	0.143	0.271167	0.480167	0.5925	0.693	0.827667		0	0	0	0	0	0	1	1	1	1	1	1			0	0	0	0	0	0	0.143	0.271167	0.480167	0.5925	0.693	0.827667			0	0	0	0	0	0	55	55
79.5	-0.00333333	-0.00166667	-0.003	-0.001	0.0055	0.0455	0.149	0.280167	0.487167	0.5965	0.702	0.812667		0	0	0	0	0	0	1	1	1	1	1	1			0	0	0	0	0	0	0.149	0.280167	0.487167	0.5965	0.702	0.812667			0	0	0	0	0	0	56	56
81	-0.00233333	-0.000666667	-0.001	0	0.0065	0.0525	0.162	0.296167	0.501167	0.6195	0.71	0.819667		0	0	0	0	0	0	1	1	1	1	1	1			0	0	0	0	0	0	0.162	0.296167	0.501167	0.6195	0.71	0.819667			0	0	0	0	0	0	57	57
82.5	-0.00233333	0.000333333	-0.001	0.002	0.0065	0.0595	0.175	0.303167	0.515167	0.6295	0.716	0.828667		0	0	0	0	0	0	1	1	1	1	1	1			0	0	0	0	0	0	0.175	0.303167	0.515167	0.6295	0.716	0.828667			0	0	0	0	0	0	58	58
84	-0.00233333	0.00133333	0.001	0.001	0.0075	0.0665	0.185	0.317167	0.517167	0.6335	0.735	0.815667		0	0	0	0	0	0	1	1	1	1	1	1			0	0	0	0	0	0	0.185	0.317167	0.517167	0.6335	0.735	0.815667			0	0	0	0	0	0	59	59
85.5	-0.00333333	0.000333333	0	0.002	0.0075	0.0745	0.193	0.331167	0.534167	0.6245	0.725	0.815667		0	0	0	0	0	0	1	1	1	1	1	1			0	0	0	0	0	0	0.193	0.331167	0.534167	0.6245	0.725	0.815667			0	0	0	0	0	0	60	60
87	-0.00233333	0.00133333	0.001	0.002	0.0105	0.0835	0.202	0.337167	0.545167	0.6465	0.736	0.850667		0	0	0	0	0	0	1	1	1	1	1	1			0	0	0	0	0	0	0.202	0.337167	0.545167	0.6465	0.736	0.850667			0	0	0	0	0	0	61	61
88.5	-0.00333333	0.00133333	0	0.002	0.0105	0.0905	0.211	0.348167	0.557167	0.6545	0.758	0.855667		0	0	0	0	0	0	1	1	1	1	1	1			0	0	0	0	0	0	0.211	0.348167	0.557167	0.6545	0.758	0.855667			0	0	0	0	0	0	62	62
90	-0.00133333	0.00233333	0.001	0.003	0.0135	0.0985	0.215	0.363167	0.557167	0.6575	0.768	0.852667		0	0	0	0	0	0	1	1	1	1	1	1			0	0	0	0	0	0	0.215	0.363167	0.557167	0.6575	0.768	0.852667			0	0	0	0	0	0	63	63
91.5	-0.00233333	0.000333333	0.001	0.002	0.0145	0.1055	0.223	0.370167	0.565167	0.6625	0.766	0.856667		0	0	0	0	0	1	1	1	1	1	1	1			0	0	0	0	0	0.1055	0.223	0.370167	0.565167	0.6625	0.766	0.856667			0	0	0	0	0	64	64	64
93	-0.000333333	0.00233333	0.002	0.002	0.0165	0.1125	0.229	0.376167	0.581167	0.6595	0.74	0.860667		0	0	0	0	0	1	1	1	1	1	1	1			0	0	0	0	0	0.1125	0.229	0.376167	0.581167	0.6595	0.74	0.860667			0	0	0	0	0	65	65	65
94.5	-0.00133333	0.00133333	0	0.004	0.0175	0.1225	0.237	0.387167	0.591167	0.6785	0.776	0.864667		0	0	0	0	0	1	1	1	1	1	1	1			0	0	0	0	0	0.1225	0.237	0.387167	0.591167	0.6785	0.776	0.864667			0	0	0	0	0	66	66	66
96	-0.00133333	0.00233333	0.002	0.005	0.0215	0.1265	0.248	0.400167	0.585167	0.6895	0.786	0.897667		0	0	0	0	0	1	1	1	1	1	1	1			0	0	0	0	0	0.1265	0.248	0.400167	0.585167	0.6895	0.786	0.897667			0	0	0	0	0	67	67	67
97.5	-0.00133333	0.00133333	0.001	0.004	0.0225	0.1315	0.248	0.405167	0.592167	0.6995	0.781	0.891667		0	0	0	0	0	1	1	1	1	1	1	1			0	0	0	0	0	0.1315	0.248	0.405167	0.592167	0.6995	0.781	0.891667			0	0	0	0	0	68	68	68
99	-0.00333333	0.000333333	0.002	0.004	0.0245	0.1385	0.253	0.406167	0.604167	0.7055	0.773	0.878667		0	0	0	0	0	1	1	1	1	1	1	1			0	0	0	0	0	0.1385	0.253	0.406167	0.604167	0.7055	0.773	0.878667			0	0	0	0	0	69	69	69
100.5	-0.00233333	0.00233333	0.001	0.005	0.0265	0.1485	0.258	0.409167	0.612167	0.6995	0.779	0.891667		0	0	0	0	0	1	1	1	1	1	1	1			0	0	0	0	0	0.1485	0.258	0.409167	0.612167	0.6995	0.779	0.891667			0	0	0	0	0	70	70	70
102	-0.00233333	0.00333333	0.001	0.005	0.0295	0.1565	0.266	0.424167	0.623167	0.7225	0.777	0.879667		0	0	0	0	0	1	1	1	1	1	1	1			0	0	0	0	0	0.1565	0.266	0.424167	0.623167	0.7225	0.777	0.879667			0	0	0	0	0	71	71	71
103.5	-0.00233333	0.000333333	0.002	0.005	0.0315	0.1605	0.272	0.429167	0.636167	0.7165	0.788	0.900667		0	0	0	0	0	1	1	1	1	1	1	1			0	0	0	0	0	0.1605	0.272	0.429167	0.636167	0.7165	0.788	0.900667			0	0	0	0	0	72	72	72
105	-0.00333333	0.000333333	0.002	0.006	0.0355	0.1685	0.277	0.432167	0.628167	0.7235	0.777	0.890667		0	0	0	0	0	1	1	1	1	1	1	1			0	0	0	0	0	0.1685	0.277	0.432167	0.628167	0.7235	0.777	0.890667			0	0	0	0	0	73	73	73
106.5	-0.00233333	0.00133333	0.001	0.006	0.0365	0.1745	0.282	0.436167	0.626167	0.7145	0.796	0.900667		0	0	0	0	0	1	1	1	1	1	1	1			0	0	0	0	0	0.1745	0.282	0.436167	0.626167	0.7145	0.796	0.900667			0	0	0	0	0	74	74	74
108	-0.00333333	0.00233333	0.003	0.007	0.0405	0.1815	0.291	0.444167	0.617167	0.7315	0.802	0.901667		0	0	0	0	0	1	1	1	1	1	1	1			0	0	0	0	0	0.1815	0.291	0.444167	0.617167	0.7315	0.802	0.901667			0	0	0	0	0	75	75	75
109.5	-0.00233333	0.00233333	0.003	0.008	0.0445	0.1905	0.294	0.446167	0.642167	0.7315	0.826	0.925667		0	0	0	0	0	1	1	1	1	1	1	1			0	0	0	0	0	0.1905	0.294	0.446167	0.642167	0.7315	0.826	0.925667			0	0	0	0	0	76	76	76
111	-0.00133333	0.00133333	0.002	0.009	0.0465	0.1955	0.294	0.439167	0.641167	0.7335	0.806	0.922667		0	0	0	0	0	1	1	1	1	1	1	1			0	0	0	0	0	0.1955	0.294	0.439167	0.641167	0.7335	0.806	0.922667			0	0	0	0	0	77	77	77
112.5	-0.000333333	0.00233333	0.003	0.009	0.0515	0.2005	0.299	0.446167	0.636167	0.7475	0.825	0.923667		0	0	0	0	0	1	1	1	1	1	1	1			0	0	0	0	0	0.2005	0.299	0.446167	0.636167	0.7475	0.825	0.923667			0	0	0	0	0	78	78	78
114	-0.00133333	0.00233333	0.003	0.01	0.0535	0.2055	0.307	0.448167	0.641167	0.7445	0.833	0.938667		0	0	0	0	0	1	1	1	1	1	1	1			0	0	0	0	0	0.2055	0.307	0.448167	0.641167	0.7445	0.833	0.938667			0	0	0	0	0	79	79	79
115.5	-0.00233333	0.00233333	0.004	0.013	0.0565	0.2165	0.318	0.456167	0.638167	0.7445	0.842	0.951667		0	0	0	0	0	1	1	1	1	1	1	1			0	0	0	0	0	0.2165	0.318	0.456167	0.638167	0.7445	0.842	0.951667			0	0	0	0	0	80	80	80
117	-0.00333333	0.000333333	0.003	0.012	0.0585	0.2215	0.317	0.457167	0.645167	0.7515	0.831	0.950667		0	0	0	0	0	1	1	1	1	1	1	1			0	0	0	0	0	0.2215	0.317	0.457167	0.645167	0.7515	0.831	0.950667			0	0	0	0	0	81	81	81
118.5	-0.00233333	0.00233333	0.004	0.013	0.0625	0.2265	0.319	0.448167	0.654167	0.7525	0.85	0.961667		0	0	0	0	0	1	1	1	1	1	1	1			0	0	0	0	0	0.2265	0.319	0.448167	0.654167	0.7525	0.85	0.961667			0	0	0	0	0	82	82	82
120	-0.00233333	0.00233333	0.002	0.013	0.0645	0.2355	0.329	0.458167	0.666167	0.7715	0.859	0.940667		0	0	0	0	0	1	1	1	1	1	1	1			0	0	0	0	0	0.2355	0.329	0.458167	0.666167	0.7715	0.859	0.940667			0	0	0	0	0	83	83	83
121.5	-0.00133333	0.00133333	0.004	0.015	0.0665	0.2435	0.337	0.459167	0.668167	0.7675	0.861	0.957667		0	0	0	0	0	1	1	1	1	1	1	1			0	0	0	0	0	0.2435	0.337	0.459167	0.668167	0.7675	0.861	0.957667			0	0	0	0	0	84	84	84
123	-0.00133333	0.00233333	0.005	0.015	0.0695	0.2475	0.327	0.469167	0.663167	0.7645	0.865	0.955667		0	0	0	0	0	1	1	1	1	1	1	1			0	0	0	0	0	0.2475	0.327	0.469167	0.663167	0.7645	0.865	0.955667			0	0	0	0	0	85	85	85
124.5	-0.00233333	0.00233333	0.005	0.016	0.0725	0.2485	0.338	0.475167	0.672167	0.7585	0.861	0.971667		0	0	0	0	1	1	1	1	1	1	1	1			0	0	0	0	0.0725	0.2485	0.338	0.475167	0.672167	0.7585	0.861	0.971667			0	0	0	0	86	86	86	86
126	-0.00233333	0.00133333	0.006	0.017	0.0765	0.2535	0.347	0.476167	0.676167	0.7605	0.873	0.998667		0	0	0	0	1	1	1	1	1	1	1	1			0	0	0	0	0.0765	0.2535	0.347	0.476167	0.676167	0.7605	0.873	0.998667			0	0	0	0	87	87	87	87
127.5	-0.00133333	0.00233333	0.006	0.021	0.0785	0.2625	0.339	0.483167	0.664167	0.7845	0.906	0.992667		0	0	0	0	1	1	1	1	1	1	1	1			0	0	0	0	0.0785	0.2625	0.339	0.483167	0.664167	0.7845	0.906	0.992667			0	0	0	0	88	88	88	88
129	-0.00233333	0.00233333	0.004	0.02	0.0815	0.2695	0.343	0.467167	0.656167	0.7805	0.91	0.995667		0	0	0	0	1	1	1	1	1	1	1	1			0	0	0	0	0.0815	0.2695	0.343	0.467167	0.656167	0.7805	0.91	0.995667			0	0	0	0	89	89	89	89
130.5	-0.00233333	0.00233333	0.006	0.021	0.0865	0.2715	0.343	0.471167	0.673167	0.7855	0.9	0.994667		0	0	0	0	1	1	1	1	1	1	1	1			0	0	0	0	0.0865	0.2715	0.343	0.471167	0.673167	0.7855	0.9	0.994667			0	0	0	0	90	90	90	90
132	-0.00233333	0.00233333	0.007	0.023	0.0895	0.2775	0.347	0.462167	0.689167	0.7945	0.914	0.997667		0	0	0	0	1	1	1	1	1	1	1	1			0	0	0	0	0.0895	0.2775	0.347	0.462167	0.689167	0.7945	0.914	0.997667			0	0	0	0	91	91	91	91
133.5	-0.00233333	0.00233333	0.006	0.023	0.0925	0.2755	0.364	0.485167	0.688167	0.8005	0.916	1.00367		0	0	0	0	1	1	1	1	1	1	1	1			0	0	0	0	0.0925	0.2755	0.364	0.485167	0.688167	0.8005	0.916	1.00367			0	0	0	0	92	92	92	92
135	-0.00233333	0.00333333	0.007	0.024	0.0975	0.2865	0.36	0.494167	0.680167	0.8015	0.923	1.01667		0	0	0	0	1	1	1	1	1	1	1	1			0	0	0	0	0.0975	0.2865	0.36	0.494167	0.680167	0.8015	0.923	1.01667			0	0	0	0	93	93	93	93
136.5	-0.00133333	0.00433333	0.008	0.025	0.1025	0.2855	0.365	0.497167	0.694167	0.7935	0.922	1.02467		0	0	0	0	1	1	1	1	1	1	1	1			0	0	0	0	0.1025	0.2855	0.365	0.497167	0.694167	0.7935	0.922	1.02467			0	0	0	0	94	94	94	94
138	-0.00133333	0.00333333	0.006	0.026	0.1055	0.2925	0.371	0.483167	0.699167	0.8055	0.936	1.02167		0	0	0	0	1	1	1	1	1	1	1	1			0	0	0	0	0.1055	0.2925	0.371	0.483167	0.699167	0.8055	0.936	1.02167			0	0	0	0	95	95	95	95
139.5	-0.00233333	0.00533333	0.009	0.028	0.1125	0.2965	0.364	0.509167	0.706167	0.8215	0.928	1.01667		0	0	0	0	1	1	1	1	1	1	1	1			0	0	0	0	0.1125	0.2965	0.364	0.509167	0.706167	0.8215	0.928	1.01667			0	0	0	0	96	96	96	96
141	-0.00233333	0.00433333	0.009	0.028	0.1135	0.3005	0.365	0.504167	0.708167	0.8305	0.921	1.02167		0	0	0	0	1	1	1	1	1	1	1	1			0	0	0	0	0.1135	0.3005	0.365	0.504167	0.708167	0.8305	0.921	1.02167			0	0	0	0	97	97	97	97
142.5	-0.000333333	0.00433333	0.01	0.03	0.1215	0.2935	0.368	0.509167	0.720167	0.8325	0.935	1.01667		0	0	0	0	1	1	1	1	1	1	1	1			0	0	0	0	0.1215	0.2935	0.368	0.509167	0.720167	0.8325	0.935	1.01667			0	0	0	0	98	98	98	98
144	-0.00333333	0.00333333	0.008	0.029	0.1245	0.2955	0.365	0.507167	0.706167	0.8605	0.934	1.03767		0	0	0	0	1	1	1	1	1	1	1	1			0	0	0	0	0.1245	0.2955	0.365	0.507167	0.706167	0.8605	0.934	1.03767			0	0	0	0	99	99	99	99
145.5	-0.00133333	0.00333333	0.009	0.031	0.1265	0.2965	0.377	0.518167	0.715167	0.8525	0.934	1.04067		0	0	0	0	1	1	1	1	1	1	1	1			0	0	0	0	0.1265	0.2965	0.377	0.518167	0.715167	0.8525	0.934	1.04067			0	0	0	0	100	100	100	100
147	0.000666667	0.00533333	0.013	0.033	0.1335	0.3035	0.384	0.521167	0.726167	0.8525	0.919	1.02367		0	0	0	0	1	1	1	1	1	1	1	1			0	0	0	0	0.1335	0.3035	0.384	0.521167	0.726167	0.8525	0.919	1.02367			0	0	0	0	101	101	101	101
148.5	-0.00133333	0.00433333	0.011	0.033	0.1395	0.3125	0.372	0.525167	0.708167	0.8655	0.926	1.02467		0	0	0	0	1	1	1	1	1	1	1	1			0	0	0	0	0.1395	0.3125	0.372	0.525167	0.708167	0.8655	0.926	1.02467			0	0	0	0	102	102	102	102
150	-0.00133333	0.00433333	0.01	0.034	0.1445	0.3065	0.369	0.523167	0.713167	0.8565	0.938	1.04967		0	0	0	0	1	1	1	1	1	1	1	1			0	0	0	0	0.1445	0.3065	0.369	0.523167	0.713167	0.8565	0.938	1.04967			0	0	0	0	103	103	103	103
151.5	-0.00233333	0.00433333	0.012	0.034	0.1455	0.3055	0.377	0.527167	0.728167	0.8595	0.94	1.04867		0	0	0	0	1	1	1	1	1	1	1	1			0	0	0	0	0.1455	0.3055	0.377	0.527167	0.728167	0.8595	0.94	1.04867			0	0	0	0	104	104	104	104
153	-0.00433333	0.00433333	0.012	0.034	0.1525	0.2995	0.383	0.527167	0.740167	0.8605	0.971	1.05667		0	0	0	0	1	1	1	1	1	1	1	1			0	0	0	0	0.1525	0.2995	0.383	0.527167	0.740167	0.8605	0.971	1.05667			0	0	0	0	105	105	105	105
154.5	-0.00133333	0.00633333	0.014	0.037	0.1595	0.3025	0.389	0.532167	0.753167	0.8585	0.95	1.05567		0	0	0	0	1	1	1	1	1	1	1	1			0	0	0	0	0.1595	0.3025	0.389	0.532167	0.753167	0.8585	0.95	1.05567			0	0	0	0	106	106	106	106
156	-0.000333333	0.00433333	0.014	0.038	0.1605	0.3025	0.383	0.534167	0.761167	0.8615	0.965	1.06167		0	0	0	0	1	1	1	1	1	1	1	1			0	0	0	0	0.1605	0.3025	0.383	0.534167	0.761167	0.8615	0.965	1.06167			0	0	0	0	107	107	107	107
157.5	-0.00233333	0.00633333	0.015	0.037	0.1635	0.3105	0.379	0.536167	0.758167	0.8595	0.958	1.06567		0	0	0	0	1	1	1	1	1	1	1	1			0	0	0	0	0.1635	0.3105	0.379	0.536167	0.758167	0.8595	0.958	1.06567			0	0	0	0	108	108	108	108
159	-0.00233333	0.00433333	0.015	0.04	0.1685	0.3095	0.385	0.520167	0.761167	0.8675	0.956	1.05267		0	0	0	0	1	1	1	1	1	1	1	1			0	0	0	0	0.1685	0.3095	0.385	0.520167	0.761167	0.8675	0.956	1.05267			0	0	0	0	109	109	109	109
160.5	-0.00233333	0.00533333	0.014	0.039	0.1725	0.3135	0.395	0.540167	0.753167	0.8725	0.966	1.07067		0	0	0	0	1	1	1	1	1	1	1	1			0	0	0	0	0.1725	0.3135	0.395	0.540167	0.753167	0.8725	0.966	1.07067			0	0	0	0	110	110	110	110
162	-0.00133333	0.00733333	0.017	0.042	0.1815	0.3145	0.387	0.537167	0.770167	0.8745	0.987	1.07467		0	0	0	0	1	1	1	1	1	1	1	1			0	0	0	0	0.1815	0.3145	0.387	0.537167	0.770167	0.8745	0.987	1.07467			0	0	0	0	111	111	111	111
163.5	-0.00133333	0.00533333	0.017	0.042	0.1795	0.3065	0.368	0.547167	0.771167	0.8815	0.97	1.07867		0	0	0	0	1	1	1	1	1	1	1	1			0	0	0	0	0.1795	0.3065	0.368	0.547167	0.771167	0.8815	0.97	1.07867			0	0	0	0	112	112	112	112
165	-0.00233333	0.00533333	0.017	0.043	0.1845	0.3165	0.377	0.548167	0.768167	0.8935	0.98	1.07067		0	0	0	0	1	1	1	1	1	1	1	1			0	0	0	0	0.1845	0.3165	0.377	0.548167	0.768167	0.8935	0.98	1.07067			0	0	0	0	113	113	113	113
166.5	-0.000333333	0.00733333	0.018	0.046	0.1825	0.3235	0.39	0.562167	0.780167	0.8815	0.99	1.08767		0	0	0	0	1	1	1	1	1	1	1	1			0	0	0	0	0.1825	0.3235	0.39	0.562167	0.780167	0.8815	0.99	1.08767			0	0	0	0	114	114	114	114
168	-0.00133333	0.00633333	0.018	0.045	0.1845	0.3235	0.389	0.544167	0.789167	0.8925	0.997	1.08967		0	0	0	0	1	1	1	1	1	1	1	1			0	0	0	0	0.1845	0.3235	0.389	0.544167	0.789167	0.8925	0.997	1.08967			0	0	0	0	115	115	115	115
169.5	-0.00233333	0.00633333	0.018	0.046	0.1885	0.3215	0.393	0.538167	0.773167	0.8915	0.997	1.10567		0	0	0	0	1	1	1	1	1	1	1	1			0	0	0	0	0.1885	0.3215	0.393	0.538167	0.773167	0.8915	0.997	1.10567			0	0	0	0	116	116	116	116
171	-0.00133333	0.00633333	0.018	0.048	0.1895	0.3275	0.393	0.548167	0.780167	0.8965	0.993	1.09567		0	0	0	0	1	1	1	1	1	1	1	1			0	0	0	0	0.1895	0.3275	0.393	0.548167	0.780167	0.8965	0.993	1.09567			0	0	0	0	117	117	117	117
172.5	-0.00133333	0.00733333	0.019	0.049	0.1905	0.3205	0.388	0.557167	0.777167	0.8865	1.006	1.10367		0	0	0	0	1	1	1	1	1	1	1	1			0	0	0	0	0.1905	0.3205	0.388	0.557167	0.777167	0.8865	1.006	1.10367			0	0	0	0	118	118	118	118
174	-0.00133333	0.00733333	0.02	0.053	0.1985	0.3255	0.39	0.541167	0.793167	0.8905	1.003	1.10467		0	0	0	1	1	1	1	1	1	1	1	1			0	0	0	0.053	0.1985	0.3255	0.39	0.541167	0.793167	0.8905	1.003	1.10467			0	0	0	119	119	119	119	119
175.5	-0.00133333	0.00733333	0.018	0.056	0.1965	0.3345	0.394	0.556167	0.776167	0.8865	1.011	1.10967		0	0	0	1	1	1	1	1	1	1	1	1			0	0	0	0.056	0.1965	0.3345	0.394	0.556167	0.776167	0.8865	1.011	1.10967			0	0	0	120	120	120	120	120
177	-0.00133333	0.00933333	0.021	0.058	0.1985	0.3305	0.391	0.563167	0.790167	0.8805	1.005	1.10467		0	0	0	1	1	1	1	1	1	1	1	1			0	0	0	0.058	0.1985	0.3305	0.391	0.563167	0.790167	0.8805	1.005	1.10467			0	0	0	121	121	121	121	121
178.5	-0.00133333	0.00733333	0.018	0.061	0.1975	0.3155	0.4	0.556167	0.784167	0.9025	1.009	1.11067		0	0	0	1	1	1	1	1	1	1	1	1			0	0	0	0.061	0.1975	0.3155	0.4	0.556167	0.784167	0.9025	1.009	1.11067			0	0	0	122	122	122	122	122
180	-0.000333333	0.00833333	0.02	0.063	0.1945	0.3345	0.392	0.565167	0.801167	0.8935	1.015	1.11167		0	0	0	1	1	1	1	1	1	1	1	1			0	0	0	0.063	0.1945	0.3345	0.392	0.565167	0.801167	0.8935	1.015	1.11167			0	0	0	123	123	123	123	123
181.5	-0.00233333	0.00833333	0.02	0.066	0.1995	0.3405	0.393	0.567167	0.811167	0.9095	1.017	1.10967		0	0	0	1	1	1	1	1	1	1	1	1			0	0	0	0.066	0.1995	0.3405	0.393	0.567167	0.811167	0.9095	1.017	1.10967			0	0	0	124	124	124	124	124
183	-0.000333333	0.00933333	0.019	0.069	0.1985	0.3365	0.403	0.573167	0.801167	0.8965	1.023	1.11767		0	0	0	1	1	1	1	1	1	1	1	1			0	0	0	0.069	0.1985	0.3365	0.403	0.573167	0.801167	0.8965	1.023	1.11767			0	0	0	125	125	125	125	125
184.5	-0.000333333	0.00933333	0.02	0.072	0.1995	0.3295	0.402	0.555167	0.810167	0.8975	1.02	1.10767		0	0	0	1	1	1	1	1	1	1	1	1			0	0	0	0.072	0.1995	0.3295	0.402	0.555167	0.810167	0.8975	1.02	1.10767			0	0	0	126	126	126	126	126
186	-0.00233333	0.00833333	0.018	0.073	0.2025	0.3375	0.402	0.555167	0.803167	0.9105	1.031	1.11667		0	0	0	1	1	1	1	1	1	1	1	1			0	0	0	0.073	0.2025	0.3375	0.402	0.555167	0.803167	0.9105	1.031	1.11667			0	0	0	127	127	127	127	127
187.5	-0.00233333	0.00933333	0.018	0.076	0.2025	0.3485	0.397	0.571167	0.789167	0.9165	1.032	1.12867		0	0	0	1	1	1	1	1	1	1	1	1			0	0	0	0.076	0.2025	0.3485	0.397	0.571167	0.789167	0.9165	1.032	1.12867			0	0	0	128	128	128	128	128
189	-0.00233333	0.00933333	0.018	0.078	0.2035	0.3495	0.403	0.563167	0.800167	0.9115	1.037	1.12467		0	0	0	1	1	1	1	1	1	1	1	1			0	0	0	0.078	0.2035	0.3495	0.403	0.563167	0.800167	0.9115	1.037	1.12467			0	0	0	129	129	129	129	129
190.5	-0.00133333	0.0103333	0.019	0.083	0.2015	0.3365	0.396	0.563167	0.808167	0.9185	1.038	1.12467		0	0	0	1	1	1	1	1	1	1	1	1			0	0	0	0.083	0.2015	0.3365	0.396	0.563167	0.808167	0.9185	1.038	1.12467			0	0	0	130	130	130	130	130
192	-0.000333333	0.0103333	0.018	0.086	0.2035	0.3425	0.411	0.560167	0.808167	0.9235	1.041	1.13167		0	0	0	1	1	1	1	1	1	1	1	1			0	0	0	0.086	0.2035	0.3425	0.411	0.560167	0.808167	0.9235	1.041	1.13167			0	0	0	131	131	131	131	131
193.5	-0.00133333	0.0113333	0.018	0.087	0.2095	0.3465	0.427	0.558167	0.812167	0.9145	1.042	1.12467		0	0	0	1	1	1	1	1	1	1	1	1			0	0	0	0.087	0.2095	0.3465	0.427	0.558167	0.812167	0.9145	1.042	1.12467			0	0	0	132	132	132	132	132
195	-0.00133333	0.0123333	0.018	0.092	0.2085	0.3515	0.416	0.568167	0.808167	0.9245	1.049	1.12567		0	0	0	1	1	1	1	1	1	1	1	1			0	0	0	0.092	0.2085	0.3515	0.416	0.568167	0.808167	0.9245	1.049	1.12567			0	0	0	133	133	133	133	133
196.5	-0.00233333	0.0103333	0.016	0.096	0.2065	0.3535	0.42	0.570167	0.802167	0.9235	1.053	1.12267		0	0	0	1	1	1	1	1	1	1	1	1			0	0	0	0.096	0.2065	0.3535	0.42	0.570167	0.802167	0.9235	1.053	1.12267			0	0	0	134	134	134	134	134
198	-0.00133333	0.0113333	0.016	0.097	0.2045	0.3525	0.42	0.572167	0.805167	0.9405	1.05	1.12767		0	0	0	1	1	1	1	1	1	1	1	1			0	0	0	0.097	0.2045	0.3525	0.42	0.572167	0.805167	0.9405	1.05	1.12767			0	0	0	135	135	135	135	135
199.5	-0.00133333	0.0123333	0.016	0.098	0.2075	0.3615	0.422	0.582167	0.825167	0.9345	1.048	1.12967		0	0	0	1	1	1	1	1	1	1	1	1			0	0	0	0.098	0.2075	0.3615	0.422	0.582167	0.825167	0.9345	1.048	1.12967			0	0	0	136	136	136	136	136
201	-0.00133333	0.0123333	0.015	0.1	0.2075	0.3625	0.422	0.574167	0.824167	0.9385	1.058	1.12767		0	0	0	1	1	1	1	1	1	1	1	1			0	0	0	0.1	0.2075	0.3625	0.422	0.574167	0.824167	0.9385	1.058	1.12767			0	0	0	137	137	137	137	137
202.5	0.000666667	0.0133333	0.015	0.102	0.2055	0.3605	0.417	0.565167	0.819167	0.9445	1.06	1.12867		0	0	0	1	1	1	1	1	1	1	1	1			0	0	0	0.102	0.2055	0.3605	0.417	0.565167	0.819167	0.9445	1.06	1.12867			0	0	0	138	138	138	138	138
204	-0.000333333	0.0133333	0.015	0.105	0.2065	0.3625	0.417	0.563167	0.830167	0.9415	1.055	1.13167		0	0	0	1	1	1	1	1	1	1	1	1			0	0	0	0.105	0.2065	0.3625	0.417	0.563167	0.830167	0.9415	1.055	1.13167			0	0	0	139	139	139	139	139
205.5	-0.00233333	0.0113333	0.014	0.106	0.2095	0.3675	0.418	0.563167	0.833167	0.9385	1.06	1.13867		0	0	0	1	1	1	1	1	1	1	1	1			0	0	0	0.106	0.2095	0.3675	0.418	0.563167	0.833167	0.9385	1.06	1.13867			0	0	0	140	140	140	140	140
207	-0.000333333	0.0153333	0.016	0.111	0.2105	0.3615	0.433	0.570167	0.833167	0.9505	1.059	1.14067		0	0	0	1	1	1	1	1	1	1	1	1			0	0	0	0.111	0.2105	0.3615	0.433	0.570167	0.833167	0.9505	1.059	1.14067			0	0	0	141	141	141	141	141
208.5	0.000666667	0.0133333	0.015	0.113	0.2025	0.3725	0.43	0.580167	0.828167	0.9465	1.057	1.13867		0	0	0	1	1	1	1	1	1	1	1	1			0	0	0	0.113	0.2025	0.3725	0.43	0.580167	0.828167	0.9465	1.057	1.13867			0	0	0	142	142	142	142	142
210	-0.000333333	0.0133333	0.014	0.112	0.2115	0.3605	0.437	0.588167	0.836167	0.9595	1.063	1.14067		0	0	0	1	1	1	1	1	1	1	1	1			0	0	0	0.112	0.2115	0.3605	0.437	0.588167	0.836167	0.9595	1.063	1.14067			0	0	0	143	143	143	143	143
211.5	-0.000333333	0.0153333	0.014	0.118	0.2195	0.3715	0.439	0.578167	0.831167	0.9645	1.063	1.13967		0	0	0	1	1	1	1	1	1	1	1	1			0	0	0	0.118	0.2195	0.3715	0.439	0.578167	0.831167	0.9645	1.063	1.13967			0	0	0	144	144	144	144	144
213	-0.00233333	0.0153333	0.013	0.12	0.2175	0.3705	0.444	0.588167	0.843167	0.9605	1.053	1.14267		0	0	0	1	1	1	1	1	1	1	1	1			0	0	0	0.12	0.2175	0.3705	0.444	0.588167	0.843167	0.9605	1.053	1.14267			0	0	0	145	145	145	145	145
214.5	-0.00233333	0.0153333	0.014	0.12	0.2155	0.3735	0.435	0.592167	0.844167	0.9695	1.056	1.14667		0	0	0	1	1	1	1	1	1	1	1	1			0	0	0	0.12	0.2155	0.3735	0.435	0.592167	0.844167	0.9695	1.056	1.14667			0	0	0	146	146	146	146	146
216	-0.00133333	0.0153333	0.014	0.12	0.2185	0.3665	0.436	0.587167	0.842167	0.9685	1.065	1.14467		0	0	0	1	1	1	1	1	1	1	1	1			0	0	0	0.12	0.2185	0.3665	0.436	0.587167	0.842167	0.9685	1.065	1.14467			0	0	0	147	147	147	147	147
217.5	0.00166667	0.0163333	0.016	0.125	0.2195	0.3655	0.44	0.580167	0.836167	0.9655	1.068	1.14467		0	0	0	1	1	1	1	1	1	1	1	1			0	0	0	0.125	0.2195	0.3655	0.44	0.580167	0.836167	0.9655	1.068	1.14467			0	0	0	148	148	148	148	148
219	-0.00133333	0.0163333	0.014	0.126	0.2215	0.3705	0.429	0.594167	0.850167	0.9715	1.066	1.14567		0	0	0	1	1	1	1	1	1	1	1	1			0	0	0	0.126	0.2215	0.3705	0.429	0.594167	0.850167	0.9715	1.066	1.14567			0	0	0	149	149	149	149	149
220.5	-0.00133333	0.0163333	0.015	0.125	0.2135	0.3735	0.443	0.586167	0.844167	0.9685	1.065	1.14967		0	0	0	1	1	1	1	1	1	1	1	1			0	0	0	0.125	0.2135	0.3735	0.443	0.586167	0.844167	0.9685	1.065	1.14967			0	0	0	150	150	150	150	150
222	0.000666667	0.0183333	0.017	0.127	0.2205	0.3735	0.449	0.581167	0.842167	0.9705	1.07	1.15167		0	0	0	1	1	1	1	1	1	1	1	1			0	0	0	0.127	0.2205	0.3735	0.449	0.581167	0.842167	0.9705	1.07	1.15167			0	0	0	151	151	151	151	151
223.5	-0.00133333	0.0173333	0.018	0.126	0.2165	0.3785	0.453	0.586167	0.843167	0.9795	1.074	1.15567		0	0	0	1	1	1	1	1	1	1	1	1			0	0	0	0.126	0.2165	0.3785	0.453	0.586167	0.843167	0.9795	1.074	1.15567			0	0	0	152	152	152	152	152
225	-0.000333333	0.0173333	0.019	0.128	0.2175	0.3775	0.451	0.590167	0.844167	0.9755	1.068	1.15667		0	0	0	1	1	1	1	1	1	1	1	1			0	0	0	0.128	0.2175	0.3775	0.451	0.590167	0.844167	0.9755	1.068	1.15667			0	0	0	153	153	153	153	153
226.5	-0.00133333	0.0173333	0.019	0.129	0.2225	0.3685	0.44	0.600167	0.847167	0.9815	1.068	1.16167		0	0	0	1	1	1	1	1	1	1	1	1			0	0	0	0.129	0.2225	0.3685	0.44	0.600167	0.847167	0.9815	1.068	1.16167			0	0	0	154	154	154	154	154
228	-0.000333333	0.0173333	0.022	0.13	0.2245	0.3725	0.44	0.604167	0.843167	0.9765	1.066	1.16167		0	0	0	1	1	1	1	1	1	1	1	1			0	0	0	0.13	0.2245	0.3725	0.44	0.604167	0.843167	0.9765	1.066	1.16167			0	0	0	155	155	155	155	155
229.5	0.000666667	0.0193333	0.022	0.13	0.2295	0.3735	0.444	0.606167	0.849167	0.9685	1.071	1.15767		0	0	0	1	1	1	1	1	1	1	1	1			0	0	0	0.13	0.2295	0.3735	0.444	0.606167	0.849167	0.9685	1.071	1.15767			0	0	0	156	156	156	156	156
231	0.00166667	0.0183333	0.023	0.129	0.2285	0.3745	0.45	0.601167	0.850167	0.9735	1.072	1.16467		0	0	0	1	1	1	1	1	1	1	1	1			0	0	0	0.129	0.2285	0.3745	0.45	0.601167	0.850167	0.9735	1.072	1.16467			0	0	0	157	157	157	157	157
232.5	0.000666667	0.0193333	0.025	0.135	0.2285	0.3785	0.449	0.605167	0.860167	0.9695	1.068	1.16167		0	0	1	1	1	1	1	1	1	1	1	1			0	0	0.025	0.135	0.2285	0.3785	0.449	0.605167	0.860167	0.9695	1.068	1.16167			0	0	158	158	158	158	158	158
234	-0.000333333	0.0183333	0.027	0.132	0.2245	0.3825	0.448	0.604167	0.849167	0.9755	1.067	1.15767		0	0	1	1	1	1	1	1	1	1	1	1			0	0	0.027	0.132	0.2245	0.3825	0.448	0.604167	0.849167	0.9755	1.067	1.15767			0	0	159	159	159	159	159	159
235.5	-0.00233333	0.0183333	0.027	0.13	0.2285	0.3715	0.448	0.605167	0.848167	0.9755	1.072	1.15967		0	0	1	1	1	1	1	1	1	1	1	1			0	0	0.027	0.13	0.2285	0.3715	0.448	0.605167	0.848167	0.9755	1.072	1.15967			0	0	160	160	160	160	160	160
237	0.000666667	0.0193333	0.028	0.133	0.2385	0.3875	0.446	0.606167	0.865167	0.9745	1.068	1.16167		0	0	1	1	1	1	1	1	1	1	1	1			0	0	0.028	0.133	0.2385	0.3875	0.446	0.606167	0.865167	0.9745	1.068	1.16167			0	0	161	161	161	161	161	161
238.5	-0.000333333	0.0183333	0.03	0.134	0.2405	0.3965	0.449	0.600167	0.858167	0.9705	1.072	1.16267		0	0	1	1	1	1	1	1	1	1	1	1			0	0	0.03	0.134	0.2405	0.3965	0.449	0.600167	0.858167	0.9705	1.072	1.16267			0	0	162	162	162	162	162	162
240	-0.000333333	0.0173333	0.031	0.135	0.2325	0.3865	0.455	0.607167	0.863167	0.9755	1.077	1.16867		0	0	1	1	1	1	1	1	1	1	1	1			0	0	0.031	0.135	0.2325	0.3865	0.455	0.607167	0.863167	0.9755	1.077	1.16867			0	0	163	163	163	163	163	163
241.5	0.00166667	0.0193333	0.035	0.136	0.2395	0.3845	0.451	0.609167	0.867167	0.9785	1.075	1.17067		0	0	1	1	1	1	1	1	1	1	1	1			0	0	0.035	0.136	0.2395	0.3845	0.451	0.609167	0.867167	0.9785	1.075	1.17067			0	0	164	164	164	164	164	164
243	0.000666667	0.0183333	0.035	0.135	0.2445	0.3825	0.446	0.613167	0.857167	0.9745	1.079	1.16667		0	0	1	1	1	1	1	1	1	1	1	1			0	0	0.035	0.135	0.2445	0.3825	0.446	0.613167	0.857167	0.9745	1.079	1.16667			0	0	165	165	165	165	165	165
244.5	0.000666667	0.0193333	0.038	0.135	0.2455	0.3885	0.445	0.606167	0.856167	0.9725	1.082	1.16767		0	0	1	1	1	1	1	1	1	1	1	1			0	0	0.038	0.135	0.2455	0.3885	0.445	0.606167	0.856167	0.9725	1.082	1.16767			0	0	166	166	166	166	166	166
246	-0.00133333	0.0183333	0.037	0.135	0.2425	0.3845	0.449	0.608167	0.864167	0.9755	1.083	1.16667		0	0	1	1	1	1	1	1	1	1	1	1			0	0	0.037	0.135	0.2425	0.3845	0.449	0.608167	0.864167	0.9755	1.083	1.16667			0	0	167	167	167	167	167	167
247.5	0.00166667	0.0193333	0.041	0.136	0.2415	0.3825	0.453	0.614167	0.864167	0.9695	1.089	1.16767		0	0	1	1	1	1	1	1	1	1	1	1			0	0	0.041	0.136	0.2415	0.3825	0.453	0.614167	0.864167	0.9695	1.089	1.16767			0	0	168	168	168	168	168	168
249	0.000666667	0.0183333	0.043	0.14	0.2485	0.3915	0.447	0.615167	0.864167	0.9725	1.091	1.16267		0	0	1	1	1	1	1	1	1	1	1	1			0	0	0.043	0.14	0.2485	0.3915	0.447	0.615167	0.864167	0.9725	1.091	1.16267			0	0	169	169	169	169	169	169
250.5	0.000666667	0.0173333	0.044	0.138	0.2465	0.3925	0.444	0.613167	0.864167	0.9775	1.089	1.16267		0	0	1	1	1	1	1	1	1	1	1	1			0	0	0.044	0.138	0.2465	0.3925	0.444	0.613167	0.864167	0.9775	1.089	1.16267			0	0	170	170	170	170	170	170
252	-0.000333333	0.0173333	0.046	0.138	0.2425	0.3955	0.452	0.616167	0.865167	0.9825	1.09	1.16267		0	0	1	1	1	1	1	1	1	1	1	1			0	0	0.046	0.138	0.2425	0.3955	0.452	0.616167	0.865167	0.9825	1.09	1.16267			0	0	171	171	171	171	171	171
253.5	-0.000333333	0.0163333	0.045	0.136	0.2495	0.3925	0.448	0.615167	0.873167	0.9805	1.092	1.16067		0	0	1	1	1	1	1	1	1	1	1	1			0	0	0.045	0.136	0.2495	0.3925	0.448	0.615167	0.873167	0.9805	1.092	1.16067			0	0	172	172	172	172	172	172
255	0.00166667	0.0173333	0.048	0.141	0.2475	0.3895	0.445	0.614167	0.871167	0.9815	1.094	1.16467		0	0	1	1	1	1	1	1	1	1	1	1			0	0	0.048	0.141	0.2475	0.3895	0.445	0.614167	0.871167	0.9815	1.094	1.16467			0	0	173	173	173	173	173	173
256.5	0.00266667	0.0153333	0.05	0.14	0.2465	0.3915	0.449	0.616167	0.866167	0.9795	1.095	1.16467		0	0	1	1	1	1	1	1	1	1	1	1			0	0	0.05	0.14	0.2465	0.3915	0.449	0.616167	0.866167	0.9795	1.095	1.16467			0	0	174	174	174	174	174	174
258	0.000666667	0.0183333	0.051	0.141	0.2535	0.3935	0.445	0.617167	0.867167	0.9845	1.097	1.16267		0	0	1	1	1	1	1	1	1	1	1	1			0	0	0.051	0.141	0.2535	0.3935	0.445	0.617167	0.867167	0.9845	1.097	1.16267			0	0	175	175	175	175	175	175
259.5	0.000666667	0.0143333	0.051	0.139	0.2505	0.3865	0.445	0.611167	0.867167	0.9795	1.096	1.16067		0	0	1	1	1	1	1	1	1	1	1	1			0	0	0.051	0.139	0.2505	0.3865	0.445	0.611167	0.867167	0.9795	1.096	1.16067			0	0	176	176	176	176	176	176
261	0.000666667	0.0163333	0.054	0.139	0.2515	0.3925	0.451	0.613167	0.868167	0.9795	1.096	1.16267		0	0	1	1	1	1	1	1	1	1	1	1			0	0	0.054	0.139	0.2515	0.3925	0.451	0.613167	0.868167	0.9795	1.096	1.16267			0	0	177	177	177	177	177	177
262.5	0.00166667	0.0133333	0.053	0.138	0.2505	0.3865	0.447	0.614167	0.870167	0.9835	1.097	1.16167		0	0	1	1	1	1	1	1	1	1	1	1			0	0	0.053	0.138	0.2505	0.3865	0.447	0.614167	0.870167	0.9835	1.097	1.16167			0	0	178	178	178	178	178	178
264	0.00166667	0.0143333	0.056	0.14	0.2495	0.3915	0.451	0.620167	0.871167	0.9825	1.096	1.16267		0	0	1	1	1	1	1	1	1	1	1	1			0	0	0.056	0.14	0.2495	0.3915	0.451	0.620167	0.871167	0.9825	1.096	1.16267			0	0	179	179	179	179	179	179
265.5	0.00266667	0.0143333	0.057	0.144	0.2485	0.3885	0.451	0.616167	0.875167	0.9835	1.101	1.16267		0	0	1	1	1	1	1	1	1	1	1	1			0	0	0.057	0.144	0.2485	0.3885	0.451	0.616167	0.875167	0.9835	1.101	1.16267			0	0	180	180	180	180	180	180
267	0.00166667	0.0143333	0.058	0.141	0.2545	0.3865	0.449	0.613167	0.876167	0.9825	1.102	1.16267		0	0	1	1	1	1	1	1	1	1	1	1			0	0	0.058	0.141	0.2545	0.3865	0.449	0.613167	0.876167	0.9825	1.102	1.16267			0	0	181	181	181	181	181	181
268.5	0.00266667	0.0123333	0.057	0.139	0.2555	0.3875	0.45	0.615167	0.874167	0.9865	1.1	1.16367		0	0	1	1	1	1	1	1	1	1	1	1			0	0	0.057	0.139	0.2555	0.3875	0.45	0.615167	0.874167	0.9865	1.1	1.16367			0	0	182	182	182	182	182	182
270	0.00266667	0.0113333	0.059	0.142	0.2505	0.3865	0.445	0.618167	0.874167	0.9825	1.1	1.16367		0	0	1	1	1	1	1	1	1	1	1	1			0	0	0.059	0.142	0.2505	0.3865	0.445	0.618167	0.874167	0.9825	1.1	1.16367			0	0	183	183	183	183	183	183
[truncated: 54 more columns]
